# Supplementary material for: Ex vivo modeling of morphological, molecular and pharmacological tumor heterogeneity of metastatic colorectal cancer
Source: Research Square preprint supplement (doi:10.21203/rs.3.rs-6507406/v1), 2025-05-09
Supplement: Supplementary file 1 [file 0a19ee8091ef3e70130cb9c4.xlsx]

## Sheet: Data_Set_4_DSRT_RAW_211PDOs
PDO_id	run_id	assay_no	library_id	compound_name	compound_fimm	compound_type	concentration	concentration_unit	drow	dcol	plate	lum_readout	viability
Pt26_t1	KK143	1	lib1	5-FU	FIMM000439-004	combo	1	nM	I	1	p1	52829	0.942903
Pt26_t1	KK143	1	lib1	5-FU	FIMM000439-004	combo	3	nM	H	1	p1	62329	1.1166
Pt26_t1	KK143	1	lib1	5-FU	FIMM000439-004	combo	10	nM	G	1	p1	57450	1.02739
Pt26_t1	KK143	1	lib1	5-FU	FIMM000439-004	combo	30	nM	F	1	p1	57770	1.03325
Pt26_t1	KK143	1	lib1	5-FU	FIMM000439-004	combo	100	nM	D	1	p1	37660	0.665549
Pt26_t1	KK143	1	lib1	5-FU	FIMM000439-004	combo	1000	nM	B	1	p1	24520	0.425293
Pt26_t1	KK143	1	lib1	5-FU	FIMM000439-004	combo	3000	nM	C	1	p1	20240	0.347036
Pt26_t1	KK143	1	lib1	Gemcitabine	FIMM023798-003	combo	0.1	nM	I	1	p1	52829	0.942903
Pt26_t1	KK143	1	lib1	Gemcitabine	FIMM023798-003	combo	0.3	nM	H	1	p1	62329	1.1166
Pt26_t1	KK143	1	lib1	Gemcitabine	FIMM023798-003	combo	1	nM	G	1	p1	57450	1.02739
Pt26_t1	KK143	1	lib1	Gemcitabine	FIMM023798-003	combo	3	nM	F	1	p1	57770	1.03325
Pt26_t1	KK143	1	lib1	Gemcitabine	FIMM023798-003	combo	10	nM	D	1	p1	37660	0.665549
Pt26_t1	KK143	1	lib1	Gemcitabine	FIMM023798-003	combo	100	nM	B	1	p1	24520	0.425293
Pt26_t1	KK143	1	lib1	Gemcitabine	FIMM023798-003	combo	300	nM	C	1	p1	20240	0.347036
Pt26_t1	KK143	10	lib1	Lapatinib	FIMM000274-003	single	0.1	nM	O	6	p1	61010	1.09249
Pt26_t1	KK143	10	lib1	Lapatinib	FIMM000274-003	single	0.3	nM	N	6	p1	71540	1.28502
Pt26_t1	KK143	10	lib1	Lapatinib	FIMM000274-003	single	1	nM	M	6	p1	57810	1.03398
Pt26_t1	KK143	10	lib1	Lapatinib	FIMM000274-003	single	3	nM	L	6	p1	72700	1.30623
Pt26_t1	KK143	10	lib1	Lapatinib	FIMM000274-003	single	10	nM	K	6	p1	54429	0.972158
Pt26_t1	KK143	10	lib1	Lapatinib	FIMM000274-003	single	30	nM	J	6	p1	55090	0.984244
Pt26_t1	KK143	10	lib1	Lapatinib	FIMM000274-003	single	100	nM	I	6	p1	41480	0.735395
Pt26_t1	KK143	10	lib1	Lapatinib	FIMM000274-003	single	300	nM	H	6	p1	39380	0.696998
Pt26_t1	KK143	10	lib1	Lapatinib	FIMM000274-003	single	1000	nM	G	6	p1	22620	0.390553
Pt26_t1	KK143	11	lib1	Binimetinib	FIMM100407-001	single	0.1	nM	H	7	p1	66200	1.18738
Pt26_t1	KK143	11	lib1	Binimetinib	FIMM100407-001	single	0.3	nM	G	7	p1	66980	1.20164
Pt26_t1	KK143	11	lib1	Binimetinib	FIMM100407-001	single	1	nM	F	7	p1	68500	1.22944
Pt26_t1	KK143	11	lib1	Binimetinib	FIMM100407-001	single	3	nM	E	7	p1	59250	1.06031
Pt26_t1	KK143	11	lib1	Binimetinib	FIMM100407-001	single	10	nM	D	7	p1	53370	0.952795
Pt26_t1	KK143	11	lib1	Binimetinib	FIMM100407-001	single	30	nM	C	7	p1	46250	0.822611
Pt26_t1	KK143	11	lib1	Binimetinib	FIMM100407-001	single	100	nM	B	7	p1	51310	0.915129
Pt26_t1	KK143	11	lib1	Binimetinib	FIMM100407-001	single	300	nM	A	7	p1	34960	0.616181
Pt26_t1	KK143	11	lib1	Binimetinib	FIMM100407-001	single	1000	nM	P	6	p1	38340	0.677982
Pt26_t1	KK143	12	lib1	Sirolimus	FIMM023795-004	single	0.01	nM	B	8	p1	60970	1.09176
Pt26_t1	KK143	12	lib1	Sirolimus	FIMM023795-004	single	0.03	nM	A	8	p1	57729	1.0325
Pt26_t1	KK143	12	lib1	Sirolimus	FIMM023795-004	single	0.1	nM	P	7	p1	55850	0.99814
Pt26_t1	KK143	12	lib1	Sirolimus	FIMM023795-004	single	0.3	nM	O	7	p1	57910	1.03581
Pt26_t1	KK143	12	lib1	Sirolimus	FIMM023795-004	single	1	nM	N	7	p1	43720	0.776351
Pt26_t1	KK143	12	lib1	Sirolimus	FIMM023795-004	single	3	nM	M	7	p1	28780	0.503184
Pt26_t1	KK143	12	lib1	Sirolimus	FIMM023795-004	single	10	nM	L	7	p1	41940	0.743805
Pt26_t1	KK143	12	lib1	Sirolimus	FIMM023795-004	single	30	nM	K	7	p1	29780	0.521468
Pt26_t1	KK143	13	lib1	Alisertib	FIMM003761-002	single	1	nM	K	8	p1	63920	1.14569
Pt26_t1	KK143	13	lib1	Alisertib	FIMM003761-002	single	3	nM	J	8	p1	63340	1.13509
Pt26_t1	KK143	13	lib1	Alisertib	FIMM003761-002	single	10	nM	I	8	p1	51229	0.913648
Pt26_t1	KK143	13	lib1	Alisertib	FIMM003761-002	single	30	nM	H	8	p1	62350	1.11699
Pt26_t1	KK143	13	lib1	Alisertib	FIMM003761-002	single	100	nM	G	8	p1	50390	0.898308
Pt26_t1	KK143	13	lib1	Alisertib	FIMM003761-002	single	300	nM	F	8	p1	41960	0.744171
Pt26_t1	KK143	13	lib1	Alisertib	FIMM003761-002	single	1000	nM	E	8	p1	31520	0.553283
Pt26_t1	KK143	13	lib1	Alisertib	FIMM003761-002	single	3000	nM	D	8	p1	41780	0.74088
Pt26_t1	KK143	13	lib1	Alisertib	FIMM003761-002	single	10000	nM	C	8	p1	32620	0.573396
Pt26_t1	KK143	14	lib1	Navitoclax	FIMM003707-003	single	1	nM	E	9	p1	54029	0.964844
Pt26_t1	KK143	14	lib1	Navitoclax	FIMM003707-003	single	3	nM	D	9	p1	68920	1.23712
Pt26_t1	KK143	14	lib1	Navitoclax	FIMM003707-003	single	10	nM	C	9	p1	64020	1.14752
Pt26_t1	KK143	14	lib1	Navitoclax	FIMM003707-003	single	30	nM	B	9	p1	62129	1.11295
Pt26_t1	KK143	14	lib1	Navitoclax	FIMM003707-003	single	100	nM	A	9	p1	52290	0.933048
Pt26_t1	KK143	14	lib1	Navitoclax	FIMM003707-003	single	300	nM	P	8	p1	42620	0.756239
Pt26_t1	KK143	14	lib1	Navitoclax	FIMM003707-003	single	1000	nM	O	8	p1	20940	0.359835
Pt26_t1	KK143	14	lib1	Navitoclax	FIMM003707-003	single	3000	nM	N	8	p1	8840	0.138595
Pt26_t1	KK143	14	lib1	Navitoclax	FIMM003707-003	single	10000	nM	M	8	p1	2480	0.0223068
Pt26_t1	KK143	15	lib1	Atorvastatin	FIMM109447-001	single	1	nM	O	9	p1	64479	1.15592
Pt26_t1	KK143	15	lib1	Atorvastatin	FIMM109447-001	single	3	nM	N	9	p1	64160	1.15008
Pt26_t1	KK143	15	lib1	Atorvastatin	FIMM109447-001	single	10	nM	M	9	p1	56970	1.01862
Pt26_t1	KK143	15	lib1	Atorvastatin	FIMM109447-001	single	30	nM	L	9	p1	72240	1.29782
Pt26_t1	KK143	15	lib1	Atorvastatin	FIMM109447-001	single	100	nM	K	9	p1	51490	0.91842
Pt26_t1	KK143	15	lib1	Atorvastatin	FIMM109447-001	single	300	nM	J	9	p1	44850	0.797013
Pt26_t1	KK143	15	lib1	Atorvastatin	FIMM109447-001	single	1000	nM	I	9	p1	31880	0.559865
Pt26_t1	KK143	15	lib1	Atorvastatin	FIMM109447-001	single	3000	nM	H	9	p1	24280	0.420905
Pt26_t1	KK143	15	lib1	Atorvastatin	FIMM109447-001	single	10000	nM	G	9	p1	22860	0.394941
Pt26_t1	KK143	16	lib1	Luminespib	FIMM003764-001	single	0.1	nM	H	10	p1	65800	1.18007
Pt26_t1	KK143	16	lib1	Luminespib	FIMM003764-001	single	0.3	nM	G	10	p1	70160	1.25979
Pt26_t1	KK143	16	lib1	Luminespib	FIMM003764-001	single	1	nM	F	10	p1	71460	1.28356
Pt26_t1	KK143	16	lib1	Luminespib	FIMM003764-001	single	3	nM	E	10	p1	49110	0.874904
Pt26_t1	KK143	16	lib1	Luminespib	FIMM003764-001	single	10	nM	D	10	p1	15640	0.262928
Pt26_t1	KK143	16	lib1	Luminespib	FIMM003764-001	single	30	nM	C	10	p1	13000	0.214658
Pt26_t1	KK143	16	lib1	Luminespib	FIMM003764-001	single	100	nM	B	10	p1	10900	0.176261
Pt26_t1	KK143	16	lib1	Luminespib	FIMM003764-001	single	300	nM	A	10	p1	10260	0.164559
Pt26_t1	KK143	16	lib1	Luminespib	FIMM003764-001	single	1000	nM	P	9	p1	11120	0.180283
Pt26_t1	KK143	17	lib1	Palbociclib	FIMM003705-003	single	1	nM	B	11	p1	59050	1.05665
Pt26_t1	KK143	17	lib1	Palbociclib	FIMM003705-003	single	3	nM	A	11	p1	59710	1.06872
Pt26_t1	KK143	17	lib1	Palbociclib	FIMM003705-003	single	10	nM	P	10	p1	70840	1.27222
Pt26_t1	KK143	17	lib1	Palbociclib	FIMM003705-003	single	30	nM	O	10	p1	59770	1.06981
Pt26_t1	KK143	17	lib1	Palbociclib	FIMM003705-003	single	100	nM	N	10	p1	43660	0.775254
Pt26_t1	KK143	17	lib1	Palbociclib	FIMM003705-003	single	300	nM	M	10	p1	40600	0.719304
Pt26_t1	KK143	17	lib1	Palbociclib	FIMM003705-003	single	1000	nM	L	10	p1	57650	1.03105
Pt26_t1	KK143	17	lib1	Palbociclib	FIMM003705-003	single	3000	nM	K	10	p1	44280	0.786591
Pt26_t1	KK143	17	lib1	Palbociclib	FIMM003705-003	single	10000	nM	J	10	p1	60750	1.08773
Pt26_t1	KK143	18	lib1	Methotrexate	FIMM000649-004	single	0.5	nM	K	11	p1	64440	1.1552
Pt26_t1	KK143	18	lib1	Methotrexate	FIMM000649-004	single	1.5	nM	J	11	p1	68840	1.23565
Pt26_t1	KK143	18	lib1	Methotrexate	FIMM000649-004	single	5	nM	I	11	p1	55490	0.991558
Pt26_t1	KK143	18	lib1	Methotrexate	FIMM000649-004	single	15	nM	H	11	p1	67140	1.20457
Pt26_t1	KK143	18	lib1	Methotrexate	FIMM000649-004	single	50	nM	G	11	p1	48470	0.863202
Pt26_t1	KK143	18	lib1	Methotrexate	FIMM000649-004	single	150	nM	F	11	p1	37040	0.654212
Pt26_t1	KK143	18	lib1	Methotrexate	FIMM000649-004	single	500	nM	E	11	p1	33960	0.597897
Pt26_t1	KK143	18	lib1	Methotrexate	FIMM000649-004	single	1500	nM	D	11	p1	34540	0.608502
Pt26_t1	KK143	18	lib1	Methotrexate	FIMM000649-004	single	5000	nM	C	11	p1	37680	0.665914
Pt26_t1	KK143	19	lib1	Panobinostat	FIMM003783-001	single	0.1	nM	E	12	p1	51950	0.926831
Pt26_t1	KK143	19	lib1	Panobinostat	FIMM003783-001	single	0.3	nM	D	12	p1	60729	1.08735
Pt26_t1	KK143	19	lib1	Panobinostat	FIMM003783-001	single	1	nM	C	12	p1	74040	1.33073
Pt26_t1	KK143	19	lib1	Panobinostat	FIMM003783-001	single	3	nM	B	12	p1	63920	1.14569
Pt26_t1	KK143	19	lib1	Panobinostat	FIMM003783-001	single	10	nM	P	11	p1	37760	0.667377
Pt26_t1	KK143	19	lib1	Panobinostat	FIMM003783-001	single	30	nM	O	11	p1	35580	0.627517
Pt26_t1	KK143	19	lib1	Panobinostat	FIMM003783-001	single	100	nM	N	11	p1	5760	0.0822794
Pt26_t1	KK143	19	lib1	Panobinostat	FIMM003783-001	single	300	nM	M	11	p1	800	-0.00841078
Pt26_t1	KK143	19	lib1	Panobinostat	FIMM003783-001	single	1000	nM	L	11	p1	1160	-0.00182843
Pt26_t1	KK143	2	lib1	Erlotinib	FIMM000183-004	single	1	nM	C	2	p1	63779	1.14312
Pt26_t1	KK143	2	lib1	Erlotinib	FIMM000183-004	single	3	nM	B	2	p1	69460	1.24699
Pt26_t1	KK143	2	lib1	Erlotinib	FIMM000183-004	single	10	nM	P	1	p1	56590	1.01167
Pt26_t1	KK143	2	lib1	Erlotinib	FIMM000183-004	single	30	nM	O	1	p1	56729	1.01421
Pt26_t1	KK143	2	lib1	Erlotinib	FIMM000183-004	single	100	nM	N	1	p1	43380	0.770135
Pt26_t1	KK143	2	lib1	Erlotinib	FIMM000183-004	single	300	nM	M	1	p1	30280	0.53061
Pt26_t1	KK143	2	lib1	Erlotinib	FIMM000183-004	single	1000	nM	L	1	p1	17780	0.302057
Pt26_t1	KK143	2	lib1	Erlotinib	FIMM000183-004	single	3000	nM	K	1	p1	14019	0.233289
Pt26_t1	KK143	2	lib1	Erlotinib	FIMM000183-004	single	10000	nM	J	1	p1	13519	0.224147
Pt26_t1	KK143	20	lib1	Olaparib	FIMM003790-001	single	1	nM	N	12	p1	61750	1.10602
Pt26_t1	KK143	20	lib1	Olaparib	FIMM003790-001	single	3	nM	M	12	p1	43920	0.780008
Pt26_t1	KK143	20	lib1	Olaparib	FIMM003790-001	single	10	nM	L	12	p1	72640	1.30513
Pt26_t1	KK143	20	lib1	Olaparib	FIMM003790-001	single	30	nM	K	12	p1	61629	1.1038
Pt26_t1	KK143	20	lib1	Olaparib	FIMM003790-001	single	100	nM	J	12	p1	64579	1.15774
Pt26_t1	KK143	20	lib1	Olaparib	FIMM003790-001	single	300	nM	I	12	p1	53690	0.958646
Pt26_t1	KK143	20	lib1	Olaparib	FIMM003790-001	single	1000	nM	H	12	p1	52429	0.935589
Pt26_t1	KK143	20	lib1	Olaparib	FIMM003790-001	single	3000	nM	G	12	p1	46570	0.828462
Pt26_t1	KK143	21	lib1	Disulfiram+Cu	FIMM000416-004	single	5	nM	H	13	p1	56050	1.0018
Pt26_t1	KK143	21	lib1	Disulfiram+Cu	FIMM000416-004	single	15	nM	G	13	p1	64279	1.15226
Pt26_t1	KK143	21	lib1	Disulfiram+Cu	FIMM000416-004	single	50	nM	F	13	p1	63920	1.14569
Pt26_t1	KK143	21	lib1	Disulfiram+Cu	FIMM000416-004	single	150	nM	E	13	p1	53050	0.946944
Pt26_t1	KK143	21	lib1	Disulfiram+Cu	FIMM000416-004	single	1500	nM	D	13	p1	65880	1.18153
Pt26_t1	KK143	22	lib1	Linsitinib	FIMM003772-002	single	1	nM	B	14	p1	60870	1.08993
Pt26_t1	KK143	22	lib1	Linsitinib	FIMM003772-002	single	3	nM	A	14	p1	46370	0.824805
Pt26_t1	KK143	22	lib1	Linsitinib	FIMM003772-002	single	10	nM	P	13	p1	55710	0.99558
Pt26_t1	KK143	22	lib1	Linsitinib	FIMM003772-002	single	30	nM	O	13	p1	55570	0.99302
Pt26_t1	KK143	22	lib1	Linsitinib	FIMM003772-002	single	100	nM	N	13	p1	46630	0.829559
Pt26_t1	KK143	22	lib1	Linsitinib	FIMM003772-002	single	300	nM	M	13	p1	28039	0.489635
Pt26_t1	KK143	22	lib1	Linsitinib	FIMM003772-002	single	1000	nM	L	13	p1	36420	0.642876
Pt26_t1	KK143	22	lib1	Linsitinib	FIMM003772-002	single	3000	nM	K	13	p1	27060	0.471735
Pt26_t1	KK143	22	lib1	Linsitinib	FIMM003772-002	single	10000	nM	J	13	p1	13160	0.217583
Pt26_t1	KK143	23	lib1	Idasanutlin	FIMM136384-001	single	1	nM	K	14	p1	58529	1.04712
Pt26_t1	KK143	23	lib1	Idasanutlin	FIMM136384-001	single	3	nM	J	14	p1	59370	1.0625
Pt26_t1	KK143	23	lib1	Idasanutlin	FIMM136384-001	single	10	nM	I	14	p1	46630	0.829559
Pt26_t1	KK143	23	lib1	Idasanutlin	FIMM136384-001	single	30	nM	H	14	p1	63229	1.13306
Pt26_t1	KK143	23	lib1	Idasanutlin	FIMM136384-001	single	100	nM	G	14	p1	61870	1.10821
Pt26_t1	KK143	23	lib1	Idasanutlin	FIMM136384-001	single	300	nM	F	14	p1	64020	1.14752
Pt26_t1	KK143	23	lib1	Idasanutlin	FIMM136384-001	single	1000	nM	E	14	p1	51470	0.918055
Pt26_t1	KK143	23	lib1	Idasanutlin	FIMM136384-001	single	3000	nM	D	14	p1	54590	0.975102
Pt26_t1	KK143	23	lib1	Idasanutlin	FIMM136384-001	single	10000	nM	C	14	p1	48230	0.858814
Pt26_t1	KK143	24	lib1	Erastin	FIMM136615-001	single	1	nM	E	15	p1	58810	1.05226
Pt26_t1	KK143	24	lib1	Erastin	FIMM136615-001	single	3	nM	D	15	p1	65760	1.17934
Pt26_t1	KK143	24	lib1	Erastin	FIMM136615-001	single	10	nM	C	15	p1	56570	1.0113
Pt26_t1	KK143	24	lib1	Erastin	FIMM136615-001	single	30	nM	B	15	p1	55770	0.996677
Pt26_t1	KK143	24	lib1	Erastin	FIMM136615-001	single	100	nM	A	15	p1	55150	0.985341
Pt26_t1	KK143	24	lib1	Erastin	FIMM136615-001	single	300	nM	P	14	p1	62990	1.12869
Pt26_t1	KK143	24	lib1	Erastin	FIMM136615-001	single	1000	nM	O	14	p1	56229	1.00507
Pt26_t1	KK143	24	lib1	Erastin	FIMM136615-001	single	3000	nM	N	14	p1	57210	1.02301
Pt26_t1	KK143	25	lib1	2-methoxyestradiol	FIMM003765-001	single	1	nM	O	15	p1	55010	0.982781
Pt26_t1	KK143	25	lib1	2-methoxyestradiol	FIMM003765-001	single	3	nM	N	15	p1	45790	0.8142
Pt26_t1	KK143	25	lib1	2-methoxyestradiol	FIMM003765-001	single	10	nM	M	15	p1	38560	0.682004
Pt26_t1	KK143	25	lib1	2-methoxyestradiol	FIMM003765-001	single	30	nM	L	15	p1	34260	0.603382
Pt26_t1	KK143	25	lib1	2-methoxyestradiol	FIMM003765-001	single	100	nM	K	15	p1	17240	0.292183
Pt26_t1	KK143	25	lib1	2-methoxyestradiol	FIMM003765-001	single	300	nM	J	15	p1	14960	0.250495
Pt26_t1	KK143	25	lib1	2-methoxyestradiol	FIMM003765-001	single	1000	nM	I	15	p1	35820	0.631905
Pt26_t1	KK143	25	lib1	2-methoxyestradiol	FIMM003765-001	single	3000	nM	H	15	p1	16660	0.281578
Pt26_t1	KK143	25	lib1	2-methoxyestradiol	FIMM003765-001	single	10000	nM	G	15	p1	13719	0.227804
Pt26_t1	KK143	26	lib1	Vitamin C	NA	single	1	nM	I	16	p1	48410	0.862105
Pt26_t1	KK143	26	lib1	Vitamin C	NA	single	3	nM	H	16	p1	61850	1.10785
Pt26_t1	KK143	26	lib1	Vitamin C	NA	single	10	nM	G	16	p1	57510	1.02849
Pt26_t1	KK143	26	lib1	Vitamin C	NA	single	30	nM	F	16	p1	57610	1.03032
Pt26_t1	KK143	26	lib1	Vitamin C	NA	single	100	nM	E	16	p1	52050	0.92866
Pt26_t1	KK143	26	lib1	Vitamin C	NA	single	300	nM	D	16	p1	59810	1.07055
Pt26_t1	KK143	26	lib1	Vitamin C	NA	single	1000	nM	C	16	p1	52970	0.945481
Pt26_t1	KK143	26	lib1	Vitamin C	NA	single	3000	nM	B	16	p1	64479	1.15592
Pt26_t1	KK143	26	lib1	Vitamin C	NA	single	10000	nM	P	15	p1	58510	1.04678
Pt26_t1	KK143	27	lib1	Pevonedistat	FIMM115472-001	single	1	nM	B	17	p1	52829	0.942903
Pt26_t1	KK143	27	lib1	Pevonedistat	FIMM115472-001	single	3	nM	A	17	p1	52290	0.933048
Pt26_t1	KK143	27	lib1	Pevonedistat	FIMM115472-001	single	10	nM	P	16	p1	68580	1.2309
Pt26_t1	KK143	27	lib1	Pevonedistat	FIMM115472-001	single	30	nM	O	16	p1	65460	1.17385
Pt26_t1	KK143	27	lib1	Pevonedistat	FIMM115472-001	single	100	nM	N	16	p1	46110	0.820051
Pt26_t1	KK143	27	lib1	Pevonedistat	FIMM115472-001	single	300	nM	M	16	p1	29980	0.525125
Pt26_t1	KK143	27	lib1	Pevonedistat	FIMM115472-001	single	1000	nM	L	16	p1	27920	0.487459
Pt26_t1	KK143	27	lib1	Pevonedistat	FIMM115472-001	single	3000	nM	K	16	p1	13619	0.225976
Pt26_t1	KK143	27	lib1	Pevonedistat	FIMM115472-001	single	10000	nM	J	16	p1	7900	0.121408
Pt26_t1	KK143	28	lib1	Gedatolisib	FIMM133857-001	single	0.1	nM	K	17	p1	52350	0.934145
Pt26_t1	KK143	28	lib1	Gedatolisib	FIMM133857-001	single	0.3	nM	J	17	p1	59370	1.0625
Pt26_t1	KK143	28	lib1	Gedatolisib	FIMM133857-001	single	1	nM	I	17	p1	55090	0.984244
Pt26_t1	KK143	28	lib1	Gedatolisib	FIMM133857-001	single	3	nM	H	17	p1	58010	1.03763
Pt26_t1	KK143	28	lib1	Gedatolisib	FIMM133857-001	single	10	nM	G	17	p1	54210	0.968154
Pt26_t1	KK143	28	lib1	Gedatolisib	FIMM133857-001	single	30	nM	F	17	p1	44100	0.783299
Pt26_t1	KK143	28	lib1	Gedatolisib	FIMM133857-001	single	100	nM	E	17	p1	28339	0.495121
Pt26_t1	KK143	28	lib1	Gedatolisib	FIMM133857-001	single	300	nM	D	17	p1	21860	0.376657
Pt26_t1	KK143	28	lib1	Gedatolisib	FIMM133857-001	single	1000	nM	C	17	p1	11780	0.192351
Pt26_t1	KK143	29	lib1	Volasertib	FIMM100375-001	single	0.1	nM	E	18	p1	56990	1.01898
Pt26_t1	KK143	29	lib1	Volasertib	FIMM100375-001	single	0.3	nM	D	18	p1	64279	1.15226
Pt26_t1	KK143	29	lib1	Volasertib	FIMM100375-001	single	1	nM	C	18	p1	62090	1.11223
Pt26_t1	KK143	29	lib1	Volasertib	FIMM100375-001	single	3	nM	B	18	p1	54529	0.973986
Pt26_t1	KK143	29	lib1	Volasertib	FIMM100375-001	single	10	nM	P	17	p1	36680	0.64763
Pt26_t1	KK143	29	lib1	Volasertib	FIMM100375-001	single	30	nM	A	18	p1	16900	0.285966
Pt26_t1	KK143	29	lib1	Volasertib	FIMM100375-001	single	100	nM	O	17	p1	16780	0.283772
Pt26_t1	KK143	29	lib1	Volasertib	FIMM100375-001	single	300	nM	N	17	p1	16600	0.280481
Pt26_t1	KK143	29	lib1	Volasertib	FIMM100375-001	single	1000	nM	M	17	p1	16540	0.279384
Pt26_t1	KK143	3	lib1	Encorafenib	FIMM136367-001	single	0.1	nM	K	2	p1	57470	1.02776
Pt26_t1	KK143	3	lib1	Encorafenib	FIMM136367-001	single	0.3	nM	L	2	p1	61550	1.10236
Pt26_t1	KK143	3	lib1	Encorafenib	FIMM136367-001	single	1	nM	I	2	p1	58029	1.03798
Pt26_t1	KK143	3	lib1	Encorafenib	FIMM136367-001	single	3	nM	J	2	p1	54950	0.981684
Pt26_t1	KK143	3	lib1	Encorafenib	FIMM136367-001	single	10	nM	G	2	p1	58770	1.05153
Pt26_t1	KK143	3	lib1	Encorafenib	FIMM136367-001	single	30	nM	H	2	p1	63090	1.13052
Pt26_t1	KK143	3	lib1	Encorafenib	FIMM136367-001	single	100	nM	E	2	p1	61270	1.09724
Pt26_t1	KK143	3	lib1	Encorafenib	FIMM136367-001	single	300	nM	F	2	p1	61290	1.09761
Pt26_t1	KK143	3	lib1	Encorafenib	FIMM136367-001	single	1000	nM	D	2	p1	35740	0.630443
Pt26_t1	KK143	30	lib1	Tretinoin	FIMM000249-005	single	1	nM	N	18	p1	59450	1.06396
Pt26_t1	KK143	30	lib1	Tretinoin	FIMM000249-005	single	3	nM	M	18	p1	45790	0.8142
Pt26_t1	KK143	30	lib1	Tretinoin	FIMM000249-005	single	10	nM	L	18	p1	59070	1.05702
Pt26_t1	KK143	30	lib1	Tretinoin	FIMM000249-005	single	30	nM	K	18	p1	53970	0.963766
Pt26_t1	KK143	30	lib1	Tretinoin	FIMM000249-005	single	100	nM	J	18	p1	59650	1.06762
Pt26_t1	KK143	30	lib1	Tretinoin	FIMM000249-005	single	300	nM	I	18	p1	55390	0.989729
Pt26_t1	KK143	30	lib1	Tretinoin	FIMM000249-005	single	1000	nM	H	18	p1	63379	1.1358
Pt26_t1	KK143	30	lib1	Tretinoin	FIMM000249-005	single	3000	nM	G	18	p1	61250	1.09688
Pt26_t1	KK143	30	lib1	Tretinoin	FIMM000249-005	single	10000	nM	F	18	p1	57390	1.0263
Pt26_t1	KK143	31	lib1	Napabucasin	FIMM136507-001	single	2	nM	H	19	p1	65179	1.16871
Pt26_t1	KK143	31	lib1	Napabucasin	FIMM136507-001	single	6	nM	G	19	p1	55190	0.986072
Pt26_t1	KK143	31	lib1	Napabucasin	FIMM136507-001	single	20	nM	F	19	p1	64479	1.15592
Pt26_t1	KK143	31	lib1	Napabucasin	FIMM136507-001	single	60	nM	E	19	p1	51529	0.919134
Pt26_t1	KK143	31	lib1	Napabucasin	FIMM136507-001	single	200	nM	D	19	p1	59829	1.07089
Pt26_t1	KK143	31	lib1	Napabucasin	FIMM136507-001	single	600	nM	C	19	p1	14719	0.246088
Pt26_t1	KK143	31	lib1	Napabucasin	FIMM136507-001	single	2000	nM	B	19	p1	1019	-0.00440652
Pt26_t1	KK143	31	lib1	Napabucasin	FIMM136507-001	single	6000	nM	A	19	p1	420	-0.0153588
Pt26_t1	KK143	31	lib1	Napabucasin	FIMM136507-001	single	20000	nM	O	18	p1	580	-0.0124333
Pt26_t1	KK143	32	lib1	LCL161	FIMM133892-001	single	2.5	nM	B	20	p1	58750	1.05116
Pt26_t1	KK143	32	lib1	LCL161	FIMM133892-001	single	7.5	nM	A	20	p1	47610	0.847477
Pt26_t1	KK143	32	lib1	LCL161	FIMM133892-001	single	250	nM	N	19	p1	54570	0.974736
Pt26_t1	KK143	32	lib1	LCL161	FIMM133892-001	single	750	nM	M	19	p1	14440	0.240987
Pt26_t1	KK143	32	lib1	LCL161	FIMM133892-001	single	25000	nM	J	19	p1	37860	0.669205
Pt26_t1	KK143	33	lib1	Eltanexor	FIMM136587-001	single	1	nM	L	20	p1	71980	1.29307
Pt26_t1	KK143	33	lib1	Eltanexor	FIMM136587-001	single	3	nM	K	20	p1	71980	1.29307
Pt26_t1	KK143	33	lib1	Eltanexor	FIMM136587-001	single	10	nM	J	20	p1	60390	1.08115
Pt26_t1	KK143	33	lib1	Eltanexor	FIMM136587-001	single	30	nM	I	20	p1	53529	0.955702
Pt26_t1	KK143	33	lib1	Eltanexor	FIMM136587-001	single	100	nM	H	20	p1	44040	0.782202
Pt26_t1	KK143	33	lib1	Eltanexor	FIMM136587-001	single	300	nM	G	20	p1	25739	0.447581
Pt26_t1	KK143	33	lib1	Eltanexor	FIMM136587-001	single	1000	nM	F	20	p1	18080	0.307542
Pt26_t1	KK143	33	lib1	Eltanexor	FIMM136587-001	single	3000	nM	E	20	p1	13800	0.229285
Pt26_t1	KK143	33	lib1	Eltanexor	FIMM136587-001	single	10000	nM	D	20	p1	18520	0.315587
Pt26_t1	KK143	34	lib1	Bemcentinib	FIMM136394-002	single	1	nM	E	21	p1	53010	0.946213
Pt26_t1	KK143	34	lib1	Bemcentinib	FIMM136394-002	single	3	nM	D	21	p1	69980	1.2565
Pt26_t1	KK143	34	lib1	Bemcentinib	FIMM136394-002	single	10	nM	C	21	p1	57650	1.03105
Pt26_t1	KK143	34	lib1	Bemcentinib	FIMM136394-002	single	30	nM	B	21	p1	59910	1.07237
Pt26_t1	KK143	34	lib1	Bemcentinib	FIMM136394-002	single	100	nM	P	20	p1	57150	1.02191
Pt26_t1	KK143	34	lib1	Bemcentinib	FIMM136394-002	single	300	nM	A	21	p1	54150	0.967057
Pt26_t1	KK143	34	lib1	Bemcentinib	FIMM136394-002	single	1000	nM	O	20	p1	60770	1.0881
Pt26_t1	KK143	34	lib1	Bemcentinib	FIMM136394-002	single	3000	nM	N	20	p1	35320	0.622763
Pt26_t1	KK143	34	lib1	Bemcentinib	FIMM136394-002	single	10000	nM	M	20	p1	1980	0.0131647
Pt26_t1	KK143	35	lib1	Regorafenib	FIMM100364-001	single	1	nM	N	21	p1	60929	1.09101
Pt26_t1	KK143	35	lib1	Regorafenib	FIMM100364-001	single	3	nM	M	21	p1	51470	0.918055
Pt26_t1	KK143	35	lib1	Regorafenib	FIMM100364-001	single	10	nM	L	21	p1	67980	1.21993
Pt26_t1	KK143	35	lib1	Regorafenib	FIMM100364-001	single	30	nM	K	21	p1	64160	1.15008
Pt26_t1	KK143	35	lib1	Regorafenib	FIMM100364-001	single	100	nM	J	21	p1	63360	1.13546
Pt26_t1	KK143	35	lib1	Regorafenib	FIMM100364-001	single	300	nM	I	21	p1	56129	1.00324
Pt26_t1	KK143	35	lib1	Regorafenib	FIMM100364-001	single	1000	nM	H	21	p1	64220	1.15118
Pt26_t1	KK143	35	lib1	Regorafenib	FIMM100364-001	single	3000	nM	G	21	p1	50110	0.893188
Pt26_t1	KK143	35	lib1	Regorafenib	FIMM100364-001	single	10000	nM	F	21	p1	35500	0.626054
Pt26_t1	KK143	36	lib1	AZD7762	FIMM003741-001	single	0.1	nM	I	22	p1	50970	0.908913
Pt26_t1	KK143	36	lib1	AZD7762	FIMM003741-001	single	0.3	nM	H	22	p1	62410	1.11809
Pt26_t1	KK143	36	lib1	AZD7762	FIMM003741-001	single	1	nM	G	22	p1	56350	1.00728
Pt26_t1	KK143	36	lib1	AZD7762	FIMM003741-001	single	3	nM	F	22	p1	59629	1.06724
Pt26_t1	KK143	36	lib1	AZD7762	FIMM003741-001	single	10	nM	E	22	p1	54070	0.965594
Pt26_t1	KK143	36	lib1	AZD7762	FIMM003741-001	single	30	nM	D	22	p1	57629	1.03067
Pt26_t1	KK143	36	lib1	AZD7762	FIMM003741-001	single	100	nM	C	22	p1	38460	0.680176
Pt26_t1	KK143	36	lib1	AZD7762	FIMM003741-001	single	300	nM	B	22	p1	18320	0.31193
Pt26_t1	KK143	36	lib1	AZD7762	FIMM003741-001	single	1000	nM	P	21	p1	10400	0.167119
Pt26_t1	KK143	37	lib1	Crizotinib	FIMM003713-001	single	0.1	nM	C	23	p1	59950	1.07311
Pt26_t1	KK143	37	lib1	Crizotinib	FIMM003713-001	single	0.3	nM	B	23	p1	62490	1.11955
Pt26_t1	KK143	37	lib1	Crizotinib	FIMM003713-001	single	1	nM	O	22	p1	66280	1.18885
Pt26_t1	KK143	37	lib1	Crizotinib	FIMM003713-001	single	3	nM	A	23	p1	52190	0.931219
Pt26_t1	KK143	37	lib1	Crizotinib	FIMM003713-001	single	10	nM	N	22	p1	61090	1.09395
Pt26_t1	KK143	37	lib1	Crizotinib	FIMM003713-001	single	30	nM	M	22	p1	59510	1.06506
Pt26_t1	KK143	37	lib1	Crizotinib	FIMM003713-001	single	100	nM	L	22	p1	57650	1.03105
Pt26_t1	KK143	37	lib1	Crizotinib	FIMM003713-001	single	300	nM	K	22	p1	58710	1.05043
Pt26_t1	KK143	37	lib1	Crizotinib	FIMM003713-001	single	1000	nM	J	22	p1	51370	0.916226
Pt26_t1	KK143	38	lib1	LGK974	FIMM136372-001	single	1	nM	L	23	p1	59910	1.07237
Pt26_t1	KK143	38	lib1	LGK974	FIMM136372-001	single	3	nM	K	23	p1	55090	0.984244
Pt26_t1	KK143	38	lib1	LGK974	FIMM136372-001	single	10	nM	J	23	p1	60750	1.08773
Pt26_t1	KK143	38	lib1	LGK974	FIMM136372-001	single	30	nM	I	23	p1	46450	0.826268
Pt26_t1	KK143	38	lib1	LGK974	FIMM136372-001	single	100	nM	H	23	p1	56229	1.00507
Pt26_t1	KK143	38	lib1	LGK974	FIMM136372-001	single	300	nM	G	23	p1	63260	1.13363
Pt26_t1	KK143	38	lib1	LGK974	FIMM136372-001	single	1000	nM	F	23	p1	57970	1.0369
Pt26_t1	KK143	38	lib1	LGK974	FIMM136372-001	single	3000	nM	E	23	p1	52029	0.928276
Pt26_t1	KK143	38	lib1	LGK974	FIMM136372-001	single	10000	nM	D	23	p1	48250	0.859179
Pt26_t1	KK143	4	lib1	5-FU	FIMM000439-004	single	1	nM	E	3	p1	50230	0.895382
Pt26_t1	KK143	4	lib1	5-FU	FIMM000439-004	single	3	nM	D	3	p1	63129	1.13123
Pt26_t1	KK143	4	lib1	5-FU	FIMM000439-004	single	10	nM	C	3	p1	60129	1.07638
Pt26_t1	KK143	4	lib1	5-FU	FIMM000439-004	single	30	nM	B	3	p1	61029	1.09283
Pt26_t1	KK143	4	lib1	5-FU	FIMM000439-004	single	100	nM	P	2	p1	55350	0.988998
Pt26_t1	KK143	4	lib1	5-FU	FIMM000439-004	single	300	nM	A	3	p1	50650	0.903062
Pt26_t1	KK143	4	lib1	5-FU	FIMM000439-004	single	1000	nM	O	2	p1	47510	0.845649
Pt26_t1	KK143	4	lib1	5-FU	FIMM000439-004	single	3000	nM	N	2	p1	38000	0.671765
Pt26_t1	KK143	4	lib1	5-FU	FIMM000439-004	single	10000	nM	M	2	p1	27420	0.478317
Pt26_t1	KK143	40	lib1	Trametinib	FIMM003751-001	single	0.025	nM	G	24	p1	50930	0.908181
Pt26_t1	KK143	40	lib1	Trametinib	FIMM003751-001	single	0.075	nM	F	24	p1	62350	1.11699
Pt26_t1	KK143	40	lib1	Trametinib	FIMM003751-001	single	0.25	nM	E	24	p1	53350	0.952429
Pt26_t1	KK143	40	lib1	Trametinib	FIMM003751-001	single	0.75	nM	D	24	p1	71920	1.29197
Pt26_t1	KK143	40	lib1	Trametinib	FIMM003751-001	single	2.5	nM	C	24	p1	48070	0.855888
Pt26_t1	KK143	40	lib1	Trametinib	FIMM003751-001	single	7.5	nM	B	24	p1	41900	0.743074
Pt26_t1	KK143	40	lib1	Trametinib	FIMM003751-001	single	25	nM	A	24	p1	19620	0.3357
Pt26_t1	KK143	40	lib1	Trametinib	FIMM003751-001	single	75	nM	P	23	p1	20260	0.347402
Pt26_t1	KK143	40	lib1	Trametinib	FIMM003751-001	single	250	nM	O	23	p1	14019	0.233289
Pt26_t1	KK143	41	lib1	Ipatasertib	FIMM115486-003	single	1	nM	P	24	p1	59129	1.05809
Pt26_t1	KK143	41	lib1	Ipatasertib	FIMM115486-003	single	3	nM	O	24	p1	53129	0.948388
Pt26_t1	KK143	41	lib1	Ipatasertib	FIMM115486-003	single	10	nM	N	24	p1	56250	1.00545
Pt26_t1	KK143	41	lib1	Ipatasertib	FIMM115486-003	single	30	nM	M	24	p1	14280	0.238062
Pt26_t1	KK143	41	lib1	Ipatasertib	FIMM115486-003	single	100	nM	L	24	p1	55590	0.993386
Pt26_t1	KK143	41	lib1	Ipatasertib	FIMM115486-003	single	300	nM	K	24	p1	40840	0.723693
Pt26_t1	KK143	41	lib1	Ipatasertib	FIMM115486-003	single	1000	nM	J	24	p1	20580	0.353253
Pt26_t1	KK143	41	lib1	Ipatasertib	FIMM115486-003	single	3000	nM	I	24	p1	8059	0.124315
Pt26_t1	KK143	41	lib1	Ipatasertib	FIMM115486-003	single	10000	nM	H	24	p1	11040	0.17882
Pt26_t1	KK143	42	lib1	Cetuximab	NA	single	35	nM	M	23	p1	40740	0.721864
Pt26_t1	KK143	42	lib1	Cetuximab	NA	single	350	nM	N	23	p1	31520	0.553283
Pt26_t1	KK143	5	lib1	SN-38	FIMM002374-001	single	1	nM	N	3	p1	52250	0.932317
Pt26_t1	KK143	5	lib1	SN-38	FIMM002374-001	single	3	nM	M	3	p1	42740	0.758433
Pt26_t1	KK143	5	lib1	SN-38	FIMM002374-001	single	100	nM	J	3	p1	16980	0.287429
Pt26_t1	KK143	5	lib1	SN-38	FIMM002374-001	single	300	nM	I	3	p1	6820	0.101661
Pt26_t1	KK143	5	lib1	SN-38	FIMM002374-001	single	10000	nM	F	3	p1	5500	0.0775254
Pt26_t1	KK143	6	lib1	Gemcitabine	FIMM023798-003	single	0.1	nM	H	4	p1	69320	1.24443
Pt26_t1	KK143	6	lib1	Gemcitabine	FIMM023798-003	single	0.3	nM	G	4	p1	60810	1.08883
Pt26_t1	KK143	6	lib1	Gemcitabine	FIMM023798-003	single	1	nM	F	4	p1	66120	1.18592
Pt26_t1	KK143	6	lib1	Gemcitabine	FIMM023798-003	single	3	nM	E	4	p1	49030	0.873441
Pt26_t1	KK143	6	lib1	Gemcitabine	FIMM023798-003	single	10	nM	D	4	p1	46970	0.835775
Pt26_t1	KK143	6	lib1	Gemcitabine	FIMM023798-003	single	30	nM	C	4	p1	34220	0.602651
Pt26_t1	KK143	6	lib1	Gemcitabine	FIMM023798-003	single	100	nM	B	4	p1	21100	0.362761
Pt26_t1	KK143	6	lib1	Gemcitabine	FIMM023798-003	single	300	nM	A	4	p1	21320	0.366783
Pt26_t1	KK143	6	lib1	Gemcitabine	FIMM023798-003	single	1000	nM	O	3	p1	15919	0.26803
Pt26_t1	KK143	8	lib1	TAS-102	NA	single	1	nM	L	5	p1	73840	1.32707
Pt26_t1	KK143	8	lib1	TAS-102	NA	single	3	nM	K	5	p1	65780	1.1797
Pt26_t1	KK143	8	lib1	TAS-102	NA	single	10	nM	J	5	p1	64020	1.14752
Pt26_t1	KK143	8	lib1	TAS-102	NA	single	30	nM	I	5	p1	54610	0.975467
Pt26_t1	KK143	8	lib1	TAS-102	NA	single	100	nM	H	5	p1	64779	1.1614
Pt26_t1	KK143	8	lib1	TAS-102	NA	single	300	nM	G	5	p1	58850	1.05299
Pt26_t1	KK143	8	lib1	TAS-102	NA	single	1000	nM	F	5	p1	57750	1.03288
Pt26_t1	KK143	8	lib1	TAS-102	NA	single	3000	nM	E	5	p1	40780	0.722596
Pt26_t1	KK143	8	lib1	TAS-102	NA	single	10000	nM	D	5	p1	36060	0.636294
Pt26_t1	KK143	9	lib1	Afatinib	FIMM003710-001	single	0.1	nM	E	6	p1	55150	0.985341
Pt26_t1	KK143	9	lib1	Afatinib	FIMM003710-001	single	0.3	nM	D	6	p1	59029	1.05627
Pt26_t1	KK143	9	lib1	Afatinib	FIMM003710-001	single	1	nM	C	6	p1	58190	1.04093
Pt26_t1	KK143	9	lib1	Afatinib	FIMM003710-001	single	3	nM	B	6	p1	61990	1.11041
Pt26_t1	KK143	9	lib1	Afatinib	FIMM003710-001	single	10	nM	P	5	p1	54570	0.974736
Pt26_t1	KK143	9	lib1	Afatinib	FIMM003710-001	single	30	nM	A	6	p1	36480	0.643973
Pt26_t1	KK143	9	lib1	Afatinib	FIMM003710-001	single	100	nM	O	5	p1	20020	0.343013
Pt26_t1	KK143	9	lib1	Afatinib	FIMM003710-001	single	300	nM	N	5	p1	18340	0.312296
Pt26_t1	KK143	9	lib1	Afatinib	FIMM003710-001	single	1000	nM	M	5	p1	14800	0.247569
Pt26_t1	KK143	nc	lib1	DMSO	NA	control_negative	0.1	percent	A	2	p1	58890	1.05372
Pt26_t1	KK143	nc	lib1	DMSO	NA	control_negative	0.1	percent	A	12	p1	51090	0.911107
Pt26_t1	KK143	nc	lib1	DMSO	NA	control_negative	0.1	percent	C	5	p1	60110	1.07603
Pt26_t1	KK143	nc	lib1	DMSO	NA	control_negative	0.1	percent	C	20	p1	52910	0.944384
Pt26_t1	KK143	nc	lib1	DMSO	NA	control_negative	0.1	percent	F	9	p1	65360	1.17202
Pt26_t1	KK143	nc	lib1	DMSO	NA	control_negative	0.1	percent	F	15	p1	54790	0.978759
Pt26_t1	KK143	nc	lib1	DMSO	NA	control_negative	0.1	percent	I	7	p1	54050	0.965228
Pt26_t1	KK143	nc	lib1	DMSO	NA	control_negative	0.1	percent	I	13	p1	49390	0.880023
Pt26_t1	KK143	nc	lib1	DMSO	NA	control_negative	0.1	percent	I	19	p1	54590	0.975102
Pt26_t1	KK143	nc	lib1	DMSO	NA	control_negative	0.1	percent	L	8	p1	57390	1.0263
Pt26_t1	KK143	nc	lib1	DMSO	NA	control_negative	0.1	percent	L	17	p1	54270	0.969251
Pt26_t1	KK143	nc	lib1	DMSO	NA	control_negative	0.1	percent	P	3	p1	57529	1.02884
Pt26_t1	KK143	nc	lib1	DMSO	NA	control_negative	0.1	percent	P	22	p1	59850	1.07128
Pt26_t1	KK143	pc	lib1	BzCl	NA	control_positive	100000	nM	A	16	p1	1880	0.0113363
Pt26_t1	KK143	pc	lib1	BzCl	NA	control_positive	100000	nM	A	22	p1	1120	-0.0025598
Pt26_t1	KK143	pc	lib1	BzCl	NA	control_positive	100000	nM	F	6	p1	1580	0.00585098
Pt26_t1	KK143	pc	lib1	BzCl	NA	control_positive	100000	nM	I	4	p1	1100	-0.00292549
Pt26_t1	KK143	pc	lib1	BzCl	NA	control_positive	100000	nM	I	10	p1	1520	0.00475392
Pt26_t1	KK143	pc	lib1	BzCl	NA	control_positive	100000	nM	L	14	p1	1400	0.0025598
Pt26_t1	KK143	pc	lib1	BzCl	NA	control_positive	100000	nM	O	12	p1	1100	-0.00292549
Pt26_t1	KK143	pc	lib1	BzCl	NA	control_positive	100000	nM	O	21	p1	1060	-0.00365686
Pt26_t1	KK143	pc	lib1	BzCl	NA	control_positive	100000	nM	P	18	p1	580	-0.0124333
Pt26_t1	KK143	1	lib1	5-FU	FIMM000439-004	combo	1	nM	I	1	p2	49190	0.854622
Pt26_t1	KK143	1	lib1	5-FU	FIMM000439-004	combo	3	nM	H	1	p2	72600	1.27105
Pt26_t1	KK143	1	lib1	5-FU	FIMM000439-004	combo	10	nM	G	1	p2	51970	0.904075
Pt26_t1	KK143	1	lib1	5-FU	FIMM000439-004	combo	30	nM	F	1	p2	55450	0.965979
Pt26_t1	KK143	1	lib1	5-FU	FIMM000439-004	combo	100	nM	D	1	p2	49790	0.865296
Pt26_t1	KK143	1	lib1	5-FU	FIMM000439-004	combo	1000	nM	B	1	p2	21060	0.354231
Pt26_t1	KK143	1	lib1	5-FU	FIMM000439-004	combo	3000	nM	C	1	p2	20340	0.341423
Pt26_t1	KK143	1	lib1	Gemcitabine	FIMM023798-003	combo	0.1	nM	I	1	p2	49190	0.854622
Pt26_t1	KK143	1	lib1	Gemcitabine	FIMM023798-003	combo	0.3	nM	H	1	p2	72600	1.27105
Pt26_t1	KK143	1	lib1	Gemcitabine	FIMM023798-003	combo	1	nM	G	1	p2	51970	0.904075
Pt26_t1	KK143	1	lib1	Gemcitabine	FIMM023798-003	combo	3	nM	F	1	p2	55450	0.965979
Pt26_t1	KK143	1	lib1	Gemcitabine	FIMM023798-003	combo	10	nM	D	1	p2	49790	0.865296
Pt26_t1	KK143	1	lib1	Gemcitabine	FIMM023798-003	combo	100	nM	B	1	p2	21060	0.354231
Pt26_t1	KK143	1	lib1	Gemcitabine	FIMM023798-003	combo	300	nM	C	1	p2	20340	0.341423
Pt26_t1	KK143	10	lib1	Lapatinib	FIMM000274-003	single	0.1	nM	O	6	p2	64900	1.13408
Pt26_t1	KK143	10	lib1	Lapatinib	FIMM000274-003	single	0.3	nM	N	6	p2	56270	0.980565
Pt26_t1	KK143	10	lib1	Lapatinib	FIMM000274-003	single	1	nM	M	6	p2	50750	0.882373
Pt26_t1	KK143	10	lib1	Lapatinib	FIMM000274-003	single	3	nM	L	6	p2	77710	1.36195
Pt26_t1	KK143	10	lib1	Lapatinib	FIMM000274-003	single	10	nM	K	6	p2	54250	0.944632
Pt26_t1	KK143	10	lib1	Lapatinib	FIMM000274-003	single	30	nM	J	6	p2	49530	0.860671
Pt26_t1	KK143	10	lib1	Lapatinib	FIMM000274-003	single	100	nM	I	6	p2	41560	0.718896
Pt26_t1	KK143	10	lib1	Lapatinib	FIMM000274-003	single	300	nM	H	6	p2	39280	0.678338
Pt26_t1	KK143	10	lib1	Lapatinib	FIMM000274-003	single	1000	nM	G	6	p2	22920	0.387318
Pt26_t1	KK143	11	lib1	Binimetinib	FIMM100407-001	single	0.1	nM	H	7	p2	59290	1.03429
Pt26_t1	KK143	11	lib1	Binimetinib	FIMM100407-001	single	0.3	nM	G	7	p2	63740	1.11345
Pt26_t1	KK143	11	lib1	Binimetinib	FIMM100407-001	single	1	nM	F	7	p2	50610	0.879882
Pt26_t1	KK143	11	lib1	Binimetinib	FIMM100407-001	single	3	nM	E	7	p2	53970	0.939652
Pt26_t1	KK143	11	lib1	Binimetinib	FIMM100407-001	single	10	nM	D	7	p2	55770	0.971671
Pt26_t1	KK143	11	lib1	Binimetinib	FIMM100407-001	single	30	nM	C	7	p2	51470	0.89518
Pt26_t1	KK143	11	lib1	Binimetinib	FIMM100407-001	single	100	nM	B	7	p2	41720	0.721742
Pt26_t1	KK143	11	lib1	Binimetinib	FIMM100407-001	single	300	nM	A	7	p2	36120	0.622126
Pt26_t1	KK143	11	lib1	Binimetinib	FIMM100407-001	single	1000	nM	P	6	p2	38640	0.666953
Pt26_t1	KK143	12	lib1	Sirolimus	FIMM023795-004	single	0.01	nM	B	8	p2	59070	1.03037
Pt26_t1	KK143	12	lib1	Sirolimus	FIMM023795-004	single	0.03	nM	A	8	p2	58490	1.02006
Pt26_t1	KK143	12	lib1	Sirolimus	FIMM023795-004	single	0.1	nM	P	7	p2	62290	1.08765
Pt26_t1	KK143	12	lib1	Sirolimus	FIMM023795-004	single	0.3	nM	O	7	p2	55450	0.965979
Pt26_t1	KK143	12	lib1	Sirolimus	FIMM023795-004	single	1	nM	N	7	p2	42520	0.735973
Pt26_t1	KK143	12	lib1	Sirolimus	FIMM023795-004	single	3	nM	M	7	p2	33340	0.572674
Pt26_t1	KK143	12	lib1	Sirolimus	FIMM023795-004	single	10	nM	L	7	p2	34360	0.590818
Pt26_t1	KK143	12	lib1	Sirolimus	FIMM023795-004	single	30	nM	K	7	p2	28900	0.493693
Pt26_t1	KK143	13	lib1	Alisertib	FIMM003761-002	single	1	nM	K	8	p2	68340	1.19527
Pt26_t1	KK143	13	lib1	Alisertib	FIMM003761-002	single	3	nM	J	8	p2	65540	1.14546
Pt26_t1	KK143	13	lib1	Alisertib	FIMM003761-002	single	10	nM	I	8	p2	49250	0.85569
Pt26_t1	KK143	13	lib1	Alisertib	FIMM003761-002	single	30	nM	H	8	p2	67380	1.1782
Pt26_t1	KK143	13	lib1	Alisertib	FIMM003761-002	single	100	nM	G	8	p2	53870	0.937873
Pt26_t1	KK143	13	lib1	Alisertib	FIMM003761-002	single	300	nM	F	8	p2	44580	0.772617
Pt26_t1	KK143	13	lib1	Alisertib	FIMM003761-002	single	1000	nM	E	8	p2	39920	0.689723
Pt26_t1	KK143	13	lib1	Alisertib	FIMM003761-002	single	3000	nM	D	8	p2	42340	0.732771
Pt26_t1	KK143	13	lib1	Alisertib	FIMM003761-002	single	10000	nM	C	8	p2	28760	0.491203
Pt26_t1	KK143	14	lib1	Navitoclax	FIMM003707-003	single	1	nM	E	9	p2	53050	0.923286
Pt26_t1	KK143	14	lib1	Navitoclax	FIMM003707-003	single	3	nM	D	9	p2	64579	1.12837
Pt26_t1	KK143	14	lib1	Navitoclax	FIMM003707-003	single	10	nM	C	9	p2	61850	1.07983
Pt26_t1	KK143	14	lib1	Navitoclax	FIMM003707-003	single	30	nM	B	9	p2	58090	1.01294
Pt26_t1	KK143	14	lib1	Navitoclax	FIMM003707-003	single	100	nM	A	9	p2	43380	0.751271
Pt26_t1	KK143	14	lib1	Navitoclax	FIMM003707-003	single	300	nM	P	8	p2	39220	0.677271
Pt26_t1	KK143	14	lib1	Navitoclax	FIMM003707-003	single	1000	nM	O	8	p2	19260	0.322212
Pt26_t1	KK143	14	lib1	Navitoclax	FIMM003707-003	single	3000	nM	N	8	p2	6120	0.0884703
Pt26_t1	KK143	14	lib1	Navitoclax	FIMM003707-003	single	10000	nM	M	8	p2	2380	0.0219412
Pt26_t1	KK143	15	lib1	Atorvastatin	FIMM109447-001	single	1	nM	O	9	p2	61710	1.07733
Pt26_t1	KK143	15	lib1	Atorvastatin	FIMM109447-001	single	3	nM	N	9	p2	56210	0.979498
Pt26_t1	KK143	15	lib1	Atorvastatin	FIMM109447-001	single	10	nM	M	9	p2	51590	0.897315
Pt26_t1	KK143	15	lib1	Atorvastatin	FIMM109447-001	single	30	nM	L	9	p2	70980	1.24223
Pt26_t1	KK143	15	lib1	Atorvastatin	FIMM109447-001	single	100	nM	K	9	p2	46770	0.811574
Pt26_t1	KK143	15	lib1	Atorvastatin	FIMM109447-001	single	300	nM	J	9	p2	41360	0.715338
Pt26_t1	KK143	15	lib1	Atorvastatin	FIMM109447-001	single	1000	nM	I	9	p2	26180	0.445308
Pt26_t1	KK143	15	lib1	Atorvastatin	FIMM109447-001	single	3000	nM	H	9	p2	26400	0.449222
Pt26_t1	KK143	15	lib1	Atorvastatin	FIMM109447-001	single	10000	nM	G	9	p2	23320	0.394433
Pt26_t1	KK143	16	lib1	Luminespib	FIMM003764-001	single	0.1	nM	H	10	p2	68020	1.18958
Pt26_t1	KK143	16	lib1	Luminespib	FIMM003764-001	single	0.3	nM	G	10	p2	65920	1.15222
Pt26_t1	KK143	16	lib1	Luminespib	FIMM003764-001	single	1	nM	F	10	p2	64940	1.13479
Pt26_t1	KK143	16	lib1	Luminespib	FIMM003764-001	single	3	nM	E	10	p2	59310	1.03464
Pt26_t1	KK143	16	lib1	Luminespib	FIMM003764-001	single	10	nM	D	10	p2	20900	0.351385
Pt26_t1	KK143	16	lib1	Luminespib	FIMM003764-001	single	30	nM	C	10	p2	11980	0.192711
Pt26_t1	KK143	16	lib1	Luminespib	FIMM003764-001	single	100	nM	B	10	p2	10100	0.159269
Pt26_t1	KK143	16	lib1	Luminespib	FIMM003764-001	single	300	nM	A	10	p2	9100	0.14148
Pt26_t1	KK143	16	lib1	Luminespib	FIMM003764-001	single	1000	nM	P	9	p2	10740	0.170653
Pt26_t1	KK143	17	lib1	Palbociclib	FIMM003705-003	single	1	nM	B	11	p2	62950	1.09939
Pt26_t1	KK143	17	lib1	Palbociclib	FIMM003705-003	single	3	nM	A	11	p2	48670	0.845372
Pt26_t1	KK143	17	lib1	Palbociclib	FIMM003705-003	single	10	nM	P	10	p2	64860	1.13337
Pt26_t1	KK143	17	lib1	Palbociclib	FIMM003705-003	single	30	nM	O	10	p2	66260	1.15827
Pt26_t1	KK143	17	lib1	Palbociclib	FIMM003705-003	single	100	nM	N	10	p2	51210	0.890555
Pt26_t1	KK143	17	lib1	Palbociclib	FIMM003705-003	single	300	nM	M	10	p2	39740	0.686521
Pt26_t1	KK143	17	lib1	Palbociclib	FIMM003705-003	single	1000	nM	L	10	p2	53129	0.924691
Pt26_t1	KK143	17	lib1	Palbociclib	FIMM003705-003	single	3000	nM	K	10	p2	46990	0.815488
Pt26_t1	KK143	17	lib1	Palbociclib	FIMM003705-003	single	10000	nM	J	10	p2	53729	0.935365
Pt26_t1	KK143	18	lib1	Methotrexate	FIMM000649-004	single	0.5	nM	K	11	p2	59650	1.04069
Pt26_t1	KK143	18	lib1	Methotrexate	FIMM000649-004	single	1.5	nM	J	11	p2	59850	1.04425
Pt26_t1	KK143	18	lib1	Methotrexate	FIMM000649-004	single	5	nM	I	11	p2	58370	1.01792
Pt26_t1	KK143	18	lib1	Methotrexate	FIMM000649-004	single	15	nM	H	11	p2	54870	0.955661
Pt26_t1	KK143	18	lib1	Methotrexate	FIMM000649-004	single	50	nM	G	11	p2	49410	0.858536
Pt26_t1	KK143	18	lib1	Methotrexate	FIMM000649-004	single	150	nM	F	11	p2	37700	0.650232
Pt26_t1	KK143	18	lib1	Methotrexate	FIMM000649-004	single	500	nM	E	11	p2	33180	0.569828
Pt26_t1	KK143	18	lib1	Methotrexate	FIMM000649-004	single	1500	nM	D	11	p2	34500	0.593309
Pt26_t1	KK143	18	lib1	Methotrexate	FIMM000649-004	single	5000	nM	C	11	p2	32120	0.550972
Pt26_t1	KK143	19	lib1	Panobinostat	FIMM003783-001	single	0.1	nM	E	12	p2	65240	1.14013
Pt26_t1	KK143	19	lib1	Panobinostat	FIMM003783-001	single	0.3	nM	D	12	p2	58690	1.02361
Pt26_t1	KK143	19	lib1	Panobinostat	FIMM003783-001	single	1	nM	C	12	p2	56310	0.981277
Pt26_t1	KK143	19	lib1	Panobinostat	FIMM003783-001	single	3	nM	B	12	p2	59750	1.04247
Pt26_t1	KK143	19	lib1	Panobinostat	FIMM003783-001	single	10	nM	P	11	p2	45570	0.790228
Pt26_t1	KK143	19	lib1	Panobinostat	FIMM003783-001	single	30	nM	O	11	p2	24360	0.412933
Pt26_t1	KK143	19	lib1	Panobinostat	FIMM003783-001	single	100	nM	N	11	p2	5860	0.0838453
Pt26_t1	KK143	19	lib1	Panobinostat	FIMM003783-001	single	300	nM	M	11	p2	819	-0.00582673
Pt26_t1	KK143	19	lib1	Panobinostat	FIMM003783-001	single	1000	nM	L	11	p2	980	-0.00296278
Pt26_t1	KK143	2	lib1	Erlotinib	FIMM000183-004	single	1	nM	C	2	p2	60429	1.05455
Pt26_t1	KK143	2	lib1	Erlotinib	FIMM000183-004	single	3	nM	B	2	p2	58829	1.02609
Pt26_t1	KK143	2	lib1	Erlotinib	FIMM000183-004	single	10	nM	P	1	p2	58790	1.02539
Pt26_t1	KK143	2	lib1	Erlotinib	FIMM000183-004	single	30	nM	O	1	p2	59390	1.03607
Pt26_t1	KK143	2	lib1	Erlotinib	FIMM000183-004	single	100	nM	N	1	p2	50510	0.878103
Pt26_t1	KK143	2	lib1	Erlotinib	FIMM000183-004	single	300	nM	M	1	p2	28239	0.481935
Pt26_t1	KK143	2	lib1	Erlotinib	FIMM000183-004	single	1000	nM	L	1	p2	20100	0.337154
Pt26_t1	KK143	2	lib1	Erlotinib	FIMM000183-004	single	3000	nM	K	1	p2	15060	0.2475
Pt26_t1	KK143	2	lib1	Erlotinib	FIMM000183-004	single	10000	nM	J	1	p2	14160	0.23149
Pt26_t1	KK143	20	lib1	Olaparib	FIMM003790-001	single	1	nM	N	12	p2	59110	1.03108
Pt26_t1	KK143	20	lib1	Olaparib	FIMM003790-001	single	3	nM	M	12	p2	54470	0.948546
Pt26_t1	KK143	20	lib1	Olaparib	FIMM003790-001	single	10	nM	L	12	p2	73000	1.27817
Pt26_t1	KK143	20	lib1	Olaparib	FIMM003790-001	single	30	nM	K	12	p2	65960	1.15294
Pt26_t1	KK143	20	lib1	Olaparib	FIMM003790-001	single	100	nM	J	12	p2	58870	1.02682
Pt26_t1	KK143	20	lib1	Olaparib	FIMM003790-001	single	300	nM	I	12	p2	49910	0.86743
Pt26_t1	KK143	20	lib1	Olaparib	FIMM003790-001	single	1000	nM	H	12	p2	65620	1.14689
Pt26_t1	KK143	20	lib1	Olaparib	FIMM003790-001	single	3000	nM	G	12	p2	45590	0.790584
Pt26_t1	KK143	21	lib1	Disulfiram+Cu	FIMM000416-004	single	5	nM	H	13	p2	68880	1.20488
Pt26_t1	KK143	21	lib1	Disulfiram+Cu	FIMM000416-004	single	15	nM	G	13	p2	57490	1.00227
Pt26_t1	KK143	21	lib1	Disulfiram+Cu	FIMM000416-004	single	50	nM	F	13	p2	59570	1.03927
Pt26_t1	KK143	21	lib1	Disulfiram+Cu	FIMM000416-004	single	150	nM	E	13	p2	60650	1.05848
Pt26_t1	KK143	21	lib1	Disulfiram+Cu	FIMM000416-004	single	1500	nM	D	13	p2	55490	0.96669
Pt26_t1	KK143	22	lib1	Linsitinib	FIMM003772-002	single	1	nM	B	14	p2	62950	1.09939
Pt26_t1	KK143	22	lib1	Linsitinib	FIMM003772-002	single	3	nM	A	14	p2	44320	0.767992
Pt26_t1	KK143	22	lib1	Linsitinib	FIMM003772-002	single	10	nM	P	13	p2	68980	1.20666
Pt26_t1	KK143	22	lib1	Linsitinib	FIMM003772-002	single	30	nM	O	13	p2	48650	0.845017
Pt26_t1	KK143	22	lib1	Linsitinib	FIMM003772-002	single	100	nM	N	13	p2	38560	0.66553
Pt26_t1	KK143	22	lib1	Linsitinib	FIMM003772-002	single	300	nM	M	13	p2	24900	0.422539
Pt26_t1	KK143	22	lib1	Linsitinib	FIMM003772-002	single	1000	nM	L	13	p2	41940	0.725656
Pt26_t1	KK143	22	lib1	Linsitinib	FIMM003772-002	single	3000	nM	K	13	p2	25939	0.441021
Pt26_t1	KK143	22	lib1	Linsitinib	FIMM003772-002	single	10000	nM	J	13	p2	14360	0.235048
Pt26_t1	KK143	23	lib1	Idasanutlin	FIMM136384-001	single	1	nM	K	14	p2	59410	1.03642
Pt26_t1	KK143	23	lib1	Idasanutlin	FIMM136384-001	single	3	nM	J	14	p2	52190	0.907988
Pt26_t1	KK143	23	lib1	Idasanutlin	FIMM136384-001	single	10	nM	I	14	p2	52210	0.908344
Pt26_t1	KK143	23	lib1	Idasanutlin	FIMM136384-001	single	30	nM	H	14	p2	72340	1.26643
Pt26_t1	KK143	23	lib1	Idasanutlin	FIMM136384-001	single	100	nM	G	14	p2	56670	0.987681
Pt26_t1	KK143	23	lib1	Idasanutlin	FIMM136384-001	single	300	nM	F	14	p2	68300	1.19456
Pt26_t1	KK143	23	lib1	Idasanutlin	FIMM136384-001	single	1000	nM	E	14	p2	53290	0.927555
Pt26_t1	KK143	23	lib1	Idasanutlin	FIMM136384-001	single	3000	nM	D	14	p2	58270	1.01614
Pt26_t1	KK143	23	lib1	Idasanutlin	FIMM136384-001	single	10000	nM	C	14	p2	59329	1.03498
Pt26_t1	KK143	24	lib1	Erastin	FIMM136615-001	single	1	nM	E	15	p2	59329	1.03498
Pt26_t1	KK143	24	lib1	Erastin	FIMM136615-001	single	3	nM	D	15	p2	66700	1.1661
Pt26_t1	KK143	24	lib1	Erastin	FIMM136615-001	single	10	nM	C	15	p2	61210	1.06844
Pt26_t1	KK143	24	lib1	Erastin	FIMM136615-001	single	30	nM	B	15	p2	60629	1.05811
Pt26_t1	KK143	24	lib1	Erastin	FIMM136615-001	single	100	nM	A	15	p2	56050	0.976652
Pt26_t1	KK143	24	lib1	Erastin	FIMM136615-001	single	300	nM	P	14	p2	62670	1.09441
Pt26_t1	KK143	24	lib1	Erastin	FIMM136615-001	single	1000	nM	O	14	p2	53050	0.923286
Pt26_t1	KK143	24	lib1	Erastin	FIMM136615-001	single	3000	nM	N	14	p2	54770	0.953882
Pt26_t1	KK143	25	lib1	2-methoxyestradiol	FIMM003765-001	single	1	nM	O	15	p2	51629	0.898009
Pt26_t1	KK143	25	lib1	2-methoxyestradiol	FIMM003765-001	single	3	nM	N	15	p2	46070	0.799122
Pt26_t1	KK143	25	lib1	2-methoxyestradiol	FIMM003765-001	single	10	nM	M	15	p2	35860	0.617501
Pt26_t1	KK143	25	lib1	2-methoxyestradiol	FIMM003765-001	single	30	nM	L	15	p2	37280	0.642761
Pt26_t1	KK143	25	lib1	2-methoxyestradiol	FIMM003765-001	single	100	nM	K	15	p2	16960	0.281298
Pt26_t1	KK143	25	lib1	2-methoxyestradiol	FIMM003765-001	single	300	nM	J	15	p2	12960	0.210144
Pt26_t1	KK143	25	lib1	2-methoxyestradiol	FIMM003765-001	single	1000	nM	I	15	p2	13280	0.215836
Pt26_t1	KK143	25	lib1	2-methoxyestradiol	FIMM003765-001	single	3000	nM	H	15	p2	15260	0.251057
Pt26_t1	KK143	25	lib1	2-methoxyestradiol	FIMM003765-001	single	10000	nM	G	15	p2	12160	0.195913
Pt26_t1	KK143	26	lib1	Vitamin C	NA	single	1	nM	I	16	p2	45610	0.790939
Pt26_t1	KK143	26	lib1	Vitamin C	NA	single	3	nM	H	16	p2	65620	1.14689
Pt26_t1	KK143	26	lib1	Vitamin C	NA	single	10	nM	G	16	p2	65160	1.13871
Pt26_t1	KK143	26	lib1	Vitamin C	NA	single	30	nM	F	16	p2	54910	0.956373
Pt26_t1	KK143	26	lib1	Vitamin C	NA	single	100	nM	E	16	p2	60729	1.05988
Pt26_t1	KK143	26	lib1	Vitamin C	NA	single	300	nM	D	16	p2	58010	1.01152
Pt26_t1	KK143	26	lib1	Vitamin C	NA	single	1000	nM	C	16	p2	68540	1.19883
Pt26_t1	KK143	26	lib1	Vitamin C	NA	single	3000	nM	B	16	p2	59470	1.03749
Pt26_t1	KK143	26	lib1	Vitamin C	NA	single	10000	nM	P	15	p2	69000	1.20701
Pt26_t1	KK143	27	lib1	Pevonedistat	FIMM115472-001	single	1	nM	B	17	p2	53750	0.935738
Pt26_t1	KK143	27	lib1	Pevonedistat	FIMM115472-001	single	3	nM	A	17	p2	54010	0.940363
Pt26_t1	KK143	27	lib1	Pevonedistat	FIMM115472-001	single	10	nM	P	16	p2	64600	1.12874
Pt26_t1	KK143	27	lib1	Pevonedistat	FIMM115472-001	single	30	nM	O	16	p2	57110	0.995508
Pt26_t1	KK143	27	lib1	Pevonedistat	FIMM115472-001	single	100	nM	N	16	p2	45530	0.789516
Pt26_t1	KK143	27	lib1	Pevonedistat	FIMM115472-001	single	300	nM	M	16	p2	30780	0.527136
Pt26_t1	KK143	27	lib1	Pevonedistat	FIMM115472-001	single	1000	nM	L	16	p2	27639	0.471262
Pt26_t1	KK143	27	lib1	Pevonedistat	FIMM115472-001	single	3000	nM	K	16	p2	15280	0.251413
Pt26_t1	KK143	27	lib1	Pevonedistat	FIMM115472-001	single	10000	nM	J	16	p2	7440	0.111951
Pt26_t1	KK143	28	lib1	Gedatolisib	FIMM133857-001	single	0.1	nM	K	17	p2	55210	0.961709
Pt26_t1	KK143	28	lib1	Gedatolisib	FIMM133857-001	single	0.3	nM	J	17	p2	58510	1.02041
Pt26_t1	KK143	28	lib1	Gedatolisib	FIMM133857-001	single	1	nM	I	17	p2	49650	0.862805
Pt26_t1	KK143	28	lib1	Gedatolisib	FIMM133857-001	single	3	nM	H	17	p2	74460	1.30414
Pt26_t1	KK143	28	lib1	Gedatolisib	FIMM133857-001	single	10	nM	G	17	p2	61290	1.06986
Pt26_t1	KK143	28	lib1	Gedatolisib	FIMM133857-001	single	30	nM	F	17	p2	49050	0.852132
Pt26_t1	KK143	28	lib1	Gedatolisib	FIMM133857-001	single	100	nM	E	17	p2	29820	0.510059
Pt26_t1	KK143	28	lib1	Gedatolisib	FIMM133857-001	single	300	nM	D	17	p2	20560	0.345337
Pt26_t1	KK143	28	lib1	Gedatolisib	FIMM133857-001	single	1000	nM	C	17	p2	13219	0.214751
Pt26_t1	KK143	29	lib1	Volasertib	FIMM100375-001	single	0.1	nM	E	18	p2	57529	1.00296
Pt26_t1	KK143	29	lib1	Volasertib	FIMM100375-001	single	0.3	nM	D	18	p2	67120	1.17357
Pt26_t1	KK143	29	lib1	Volasertib	FIMM100375-001	single	1	nM	C	18	p2	58290	1.0165
Pt26_t1	KK143	29	lib1	Volasertib	FIMM100375-001	single	3	nM	B	18	p2	61310	1.07022
Pt26_t1	KK143	29	lib1	Volasertib	FIMM100375-001	single	10	nM	P	17	p2	38080	0.656992
Pt26_t1	KK143	29	lib1	Volasertib	FIMM100375-001	single	30	nM	A	18	p2	15800	0.260663
Pt26_t1	KK143	29	lib1	Volasertib	FIMM100375-001	single	100	nM	O	17	p2	16500	0.273115
Pt26_t1	KK143	29	lib1	Volasertib	FIMM100375-001	single	300	nM	N	17	p2	18860	0.315096
Pt26_t1	KK143	29	lib1	Volasertib	FIMM100375-001	single	1000	nM	M	17	p2	14740	0.241807
Pt26_t1	KK143	3	lib1	Encorafenib	FIMM136367-001	single	0.1	nM	K	2	p2	49270	0.856045
Pt26_t1	KK143	3	lib1	Encorafenib	FIMM136367-001	single	0.3	nM	L	2	p2	60290	1.05208
Pt26_t1	KK143	3	lib1	Encorafenib	FIMM136367-001	single	1	nM	I	2	p2	48310	0.838968
Pt26_t1	KK143	3	lib1	Encorafenib	FIMM136367-001	single	3	nM	J	2	p2	51570	0.896959
Pt26_t1	KK143	3	lib1	Encorafenib	FIMM136367-001	single	10	nM	G	2	p2	65640	1.14724
Pt26_t1	KK143	3	lib1	Encorafenib	FIMM136367-001	single	30	nM	H	2	p2	68100	1.191
Pt26_t1	KK143	3	lib1	Encorafenib	FIMM136367-001	single	100	nM	E	2	p2	56190	0.979142
Pt26_t1	KK143	3	lib1	Encorafenib	FIMM136367-001	single	300	nM	F	2	p2	52470	0.912969
Pt26_t1	KK143	3	lib1	Encorafenib	FIMM136367-001	single	1000	nM	D	2	p2	38040	0.65628
Pt26_t1	KK143	30	lib1	Tretinoin	FIMM000249-005	single	1	nM	N	18	p2	53629	0.933586
Pt26_t1	KK143	30	lib1	Tretinoin	FIMM000249-005	single	3	nM	M	18	p2	39680	0.685453
Pt26_t1	KK143	30	lib1	Tretinoin	FIMM000249-005	single	10	nM	L	18	p2	53690	0.934671
Pt26_t1	KK143	30	lib1	Tretinoin	FIMM000249-005	single	30	nM	K	18	p2	46850	0.812997
Pt26_t1	KK143	30	lib1	Tretinoin	FIMM000249-005	single	100	nM	J	18	p2	62270	1.0873
Pt26_t1	KK143	30	lib1	Tretinoin	FIMM000249-005	single	300	nM	I	18	p2	54190	0.943565
Pt26_t1	KK143	30	lib1	Tretinoin	FIMM000249-005	single	1000	nM	H	18	p2	74760	1.30948
Pt26_t1	KK143	30	lib1	Tretinoin	FIMM000249-005	single	3000	nM	G	18	p2	56810	0.990171
Pt26_t1	KK143	30	lib1	Tretinoin	FIMM000249-005	single	10000	nM	F	18	p2	58650	1.0229
Pt26_t1	KK143	31	lib1	Napabucasin	FIMM136507-001	single	2	nM	H	19	p2	68160	1.19207
Pt26_t1	KK143	31	lib1	Napabucasin	FIMM136507-001	single	6	nM	G	19	p2	63010	1.10046
Pt26_t1	KK143	31	lib1	Napabucasin	FIMM136507-001	single	20	nM	F	19	p2	54729	0.953153
Pt26_t1	KK143	31	lib1	Napabucasin	FIMM136507-001	single	60	nM	E	19	p2	55490	0.96669
Pt26_t1	KK143	31	lib1	Napabucasin	FIMM136507-001	single	200	nM	D	19	p2	63300	1.10562
Pt26_t1	KK143	31	lib1	Napabucasin	FIMM136507-001	single	600	nM	C	19	p2	22200	0.37451
Pt26_t1	KK143	31	lib1	Napabucasin	FIMM136507-001	single	2000	nM	B	19	p2	1300	0.00272955
Pt26_t1	KK143	31	lib1	Napabucasin	FIMM136507-001	single	6000	nM	A	19	p2	340	-0.0143474
Pt26_t1	KK143	31	lib1	Napabucasin	FIMM136507-001	single	20000	nM	O	18	p2	400	-0.0132801
Pt26_t1	KK143	32	lib1	LCL161	FIMM133892-001	single	2.5	nM	B	20	p2	66140	1.15614
Pt26_t1	KK143	32	lib1	LCL161	FIMM133892-001	single	7.5	nM	A	20	p2	41960	0.726011
Pt26_t1	KK143	32	lib1	LCL161	FIMM133892-001	single	250	nM	N	19	p2	56370	0.982344
Pt26_t1	KK143	32	lib1	LCL161	FIMM133892-001	single	750	nM	M	19	p2	41380	0.715694
Pt26_t1	KK143	32	lib1	LCL161	FIMM133892-001	single	25000	nM	J	19	p2	37120	0.639915
Pt26_t1	KK143	33	lib1	Eltanexor	FIMM136587-001	single	1	nM	L	20	p2	59190	1.03251
Pt26_t1	KK143	33	lib1	Eltanexor	FIMM136587-001	single	3	nM	K	20	p2	54970	0.95744
Pt26_t1	KK143	33	lib1	Eltanexor	FIMM136587-001	single	10	nM	J	20	p2	61850	1.07983
Pt26_t1	KK143	33	lib1	Eltanexor	FIMM136587-001	single	30	nM	I	20	p2	55970	0.975229
Pt26_t1	KK143	33	lib1	Eltanexor	FIMM136587-001	single	100	nM	H	20	p2	47750	0.829007
Pt26_t1	KK143	33	lib1	Eltanexor	FIMM136587-001	single	300	nM	G	20	p2	32239	0.553089
Pt26_t1	KK143	33	lib1	Eltanexor	FIMM136587-001	single	1000	nM	F	20	p2	18180	0.303
Pt26_t1	KK143	33	lib1	Eltanexor	FIMM136587-001	single	3000	nM	E	20	p2	14160	0.23149
Pt26_t1	KK143	33	lib1	Eltanexor	FIMM136587-001	single	10000	nM	D	20	p2	17680	0.294106
Pt26_t1	KK143	34	lib1	Bemcentinib	FIMM136394-002	single	1	nM	E	21	p2	50090	0.870632
Pt26_t1	KK143	34	lib1	Bemcentinib	FIMM136394-002	single	3	nM	D	21	p2	61850	1.07983
Pt26_t1	KK143	34	lib1	Bemcentinib	FIMM136394-002	single	10	nM	C	21	p2	59829	1.04387
Pt26_t1	KK143	34	lib1	Bemcentinib	FIMM136394-002	single	30	nM	B	21	p2	57770	1.00725
Pt26_t1	KK143	34	lib1	Bemcentinib	FIMM136394-002	single	100	nM	P	20	p2	68120	1.19136
Pt26_t1	KK143	34	lib1	Bemcentinib	FIMM136394-002	single	300	nM	A	21	p2	56350	0.981988
Pt26_t1	KK143	34	lib1	Bemcentinib	FIMM136394-002	single	1000	nM	O	20	p2	61590	1.0752
Pt26_t1	KK143	34	lib1	Bemcentinib	FIMM136394-002	single	3000	nM	N	20	p2	34900	0.600424
Pt26_t1	KK143	34	lib1	Bemcentinib	FIMM136394-002	single	10000	nM	M	20	p2	5640	0.0799318
Pt26_t1	KK143	35	lib1	Regorafenib	FIMM100364-001	single	1	nM	N	21	p2	54710	0.952815
Pt26_t1	KK143	35	lib1	Regorafenib	FIMM100364-001	single	3	nM	M	21	p2	59250	1.03358
Pt26_t1	KK143	35	lib1	Regorafenib	FIMM100364-001	single	10	nM	L	21	p2	58070	1.01258
Pt26_t1	KK143	35	lib1	Regorafenib	FIMM100364-001	single	30	nM	K	21	p2	50390	0.875969
Pt26_t1	KK143	35	lib1	Regorafenib	FIMM100364-001	single	100	nM	J	21	p2	67080	1.17286
Pt26_t1	KK143	35	lib1	Regorafenib	FIMM100364-001	single	300	nM	I	21	p2	51629	0.898009
Pt26_t1	KK143	35	lib1	Regorafenib	FIMM100364-001	single	1000	nM	H	21	p2	68320	1.19492
Pt26_t1	KK143	35	lib1	Regorafenib	FIMM100364-001	single	3000	nM	G	21	p2	51910	0.903007
Pt26_t1	KK143	35	lib1	Regorafenib	FIMM100364-001	single	10000	nM	F	21	p2	30839	0.528185
Pt26_t1	KK143	36	lib1	AZD7762	FIMM003741-001	single	0.1	nM	I	22	p2	50390	0.875969
Pt26_t1	KK143	36	lib1	AZD7762	FIMM003741-001	single	0.3	nM	H	22	p2	65740	1.14902
Pt26_t1	KK143	36	lib1	AZD7762	FIMM003741-001	single	1	nM	G	22	p2	63190	1.10366
Pt26_t1	KK143	36	lib1	AZD7762	FIMM003741-001	single	3	nM	F	22	p2	54410	0.947479
Pt26_t1	KK143	36	lib1	AZD7762	FIMM003741-001	single	10	nM	E	22	p2	56170	0.978786
Pt26_t1	KK143	36	lib1	AZD7762	FIMM003741-001	single	30	nM	D	22	p2	65160	1.13871
Pt26_t1	KK143	36	lib1	AZD7762	FIMM003741-001	single	100	nM	C	22	p2	36700	0.632444
Pt26_t1	KK143	36	lib1	AZD7762	FIMM003741-001	single	300	nM	B	22	p2	20900	0.351385
Pt26_t1	KK143	36	lib1	AZD7762	FIMM003741-001	single	1000	nM	P	21	p2	12480	0.201605
Pt26_t1	KK143	37	lib1	Crizotinib	FIMM003713-001	single	0.1	nM	C	23	p2	58529	1.02075
Pt26_t1	KK143	37	lib1	Crizotinib	FIMM003713-001	single	0.3	nM	B	23	p2	60950	1.06382
Pt26_t1	KK143	37	lib1	Crizotinib	FIMM003713-001	single	1	nM	O	22	p2	53410	0.92969
Pt26_t1	KK143	37	lib1	Crizotinib	FIMM003713-001	single	3	nM	A	23	p2	60510	1.05599
Pt26_t1	KK143	37	lib1	Crizotinib	FIMM003713-001	single	10	nM	N	22	p2	53610	0.933248
Pt26_t1	KK143	37	lib1	Crizotinib	FIMM003713-001	single	30	nM	M	22	p2	49050	0.852132
Pt26_t1	KK143	37	lib1	Crizotinib	FIMM003713-001	single	100	nM	L	22	p2	63879	1.11592
Pt26_t1	KK143	37	lib1	Crizotinib	FIMM003713-001	single	300	nM	K	22	p2	50950	0.88593
Pt26_t1	KK143	37	lib1	Crizotinib	FIMM003713-001	single	1000	nM	J	22	p2	59929	1.04565
Pt26_t1	KK143	38	lib1	LGK974	FIMM136372-001	single	1	nM	L	23	p2	57090	0.995152
Pt26_t1	KK143	38	lib1	LGK974	FIMM136372-001	single	3	nM	K	23	p2	48170	0.836478
Pt26_t1	KK143	38	lib1	LGK974	FIMM136372-001	single	10	nM	J	23	p2	51510	0.895892
Pt26_t1	KK143	38	lib1	LGK974	FIMM136372-001	single	30	nM	I	23	p2	46910	0.814065
Pt26_t1	KK143	38	lib1	LGK974	FIMM136372-001	single	100	nM	H	23	p2	71480	1.25113
Pt26_t1	KK143	38	lib1	LGK974	FIMM136372-001	single	300	nM	G	23	p2	59110	1.03108
Pt26_t1	KK143	38	lib1	LGK974	FIMM136372-001	single	1000	nM	F	23	p2	56329	0.981615
Pt26_t1	KK143	38	lib1	LGK974	FIMM136372-001	single	3000	nM	E	23	p2	45050	0.780978
Pt26_t1	KK143	38	lib1	LGK974	FIMM136372-001	single	10000	nM	D	23	p2	42280	0.731704
Pt26_t1	KK143	4	lib1	5-FU	FIMM000439-004	single	1	nM	E	3	p2	52270	0.909411
Pt26_t1	KK143	4	lib1	5-FU	FIMM000439-004	single	3	nM	D	3	p2	60310	1.05243
Pt26_t1	KK143	4	lib1	5-FU	FIMM000439-004	single	10	nM	C	3	p2	63440	1.10811
Pt26_t1	KK143	4	lib1	5-FU	FIMM000439-004	single	30	nM	B	3	p2	63229	1.10436
Pt26_t1	KK143	4	lib1	5-FU	FIMM000439-004	single	100	nM	P	2	p2	63320	1.10597
Pt26_t1	KK143	4	lib1	5-FU	FIMM000439-004	single	300	nM	A	3	p2	48750	0.846795
Pt26_t1	KK143	4	lib1	5-FU	FIMM000439-004	single	1000	nM	O	2	p2	49170	0.854267
Pt26_t1	KK143	4	lib1	5-FU	FIMM000439-004	single	3000	nM	N	2	p2	38500	0.664463
Pt26_t1	KK143	4	lib1	5-FU	FIMM000439-004	single	10000	nM	M	2	p2	25000	0.424318
Pt26_t1	KK143	40	lib1	Trametinib	FIMM003751-001	single	0.025	nM	G	24	p2	56250	0.980209
Pt26_t1	KK143	40	lib1	Trametinib	FIMM003751-001	single	0.075	nM	F	24	p2	57670	1.00547
Pt26_t1	KK143	40	lib1	Trametinib	FIMM003751-001	single	0.25	nM	E	24	p2	54650	0.951748
Pt26_t1	KK143	40	lib1	Trametinib	FIMM003751-001	single	0.75	nM	D	24	p2	57350	0.999777
Pt26_t1	KK143	40	lib1	Trametinib	FIMM003751-001	single	2.5	nM	C	24	p2	46370	0.804459
Pt26_t1	KK143	40	lib1	Trametinib	FIMM003751-001	single	7.5	nM	B	24	p2	33480	0.575165
Pt26_t1	KK143	40	lib1	Trametinib	FIMM003751-001	single	25	nM	A	24	p2	21280	0.358144
Pt26_t1	KK143	40	lib1	Trametinib	FIMM003751-001	single	75	nM	P	23	p2	18920	0.316164
Pt26_t1	KK143	40	lib1	Trametinib	FIMM003751-001	single	250	nM	O	23	p2	15440	0.254259
Pt26_t1	KK143	41	lib1	Ipatasertib	FIMM115486-003	single	1	nM	P	24	p2	53829	0.937143
Pt26_t1	KK143	41	lib1	Ipatasertib	FIMM115486-003	single	3	nM	O	24	p2	50610	0.879882
Pt26_t1	KK143	41	lib1	Ipatasertib	FIMM115486-003	single	10	nM	N	24	p2	53190	0.925777
Pt26_t1	KK143	41	lib1	Ipatasertib	FIMM115486-003	single	30	nM	M	24	p2	48250	0.837901
Pt26_t1	KK143	41	lib1	Ipatasertib	FIMM115486-003	single	100	nM	L	24	p2	46130	0.800189
Pt26_t1	KK143	41	lib1	Ipatasertib	FIMM115486-003	single	300	nM	K	24	p2	32480	0.557376
Pt26_t1	KK143	41	lib1	Ipatasertib	FIMM115486-003	single	1000	nM	J	24	p2	18000	0.299798
Pt26_t1	KK143	41	lib1	Ipatasertib	FIMM115486-003	single	3000	nM	I	24	p2	9780	0.153576
Pt26_t1	KK143	41	lib1	Ipatasertib	FIMM115486-003	single	10000	nM	H	24	p2	11640	0.186663
Pt26_t1	KK143	42	lib1	Cetuximab	NA	single	35	nM	M	23	p2	37460	0.645963
Pt26_t1	KK143	42	lib1	Cetuximab	NA	single	350	nM	N	23	p2	33720	0.579434
Pt26_t1	KK143	5	lib1	SN-38	FIMM002374-001	single	1	nM	N	3	p2	53350	0.928623
Pt26_t1	KK143	5	lib1	SN-38	FIMM002374-001	single	3	nM	M	3	p2	38320	0.661261
Pt26_t1	KK143	5	lib1	SN-38	FIMM002374-001	single	100	nM	J	3	p2	14560	0.238606
Pt26_t1	KK143	5	lib1	SN-38	FIMM002374-001	single	300	nM	I	3	p2	8840	0.136855
Pt26_t1	KK143	5	lib1	SN-38	FIMM002374-001	single	10000	nM	F	3	p2	6160	0.0891818
Pt26_t1	KK143	6	lib1	Gemcitabine	FIMM023798-003	single	0.1	nM	H	4	p2	69300	1.21235
Pt26_t1	KK143	6	lib1	Gemcitabine	FIMM023798-003	single	0.3	nM	G	4	p2	58070	1.01258
Pt26_t1	KK143	6	lib1	Gemcitabine	FIMM023798-003	single	1	nM	F	4	p2	61810	1.07911
Pt26_t1	KK143	6	lib1	Gemcitabine	FIMM023798-003	single	3	nM	E	4	p2	55829	0.97272
Pt26_t1	KK143	6	lib1	Gemcitabine	FIMM023798-003	single	10	nM	D	4	p2	47650	0.827228
Pt26_t1	KK143	6	lib1	Gemcitabine	FIMM023798-003	single	30	nM	C	4	p2	32120	0.550972
Pt26_t1	KK143	6	lib1	Gemcitabine	FIMM023798-003	single	100	nM	B	4	p2	23320	0.394433
Pt26_t1	KK143	6	lib1	Gemcitabine	FIMM023798-003	single	300	nM	A	4	p2	17520	0.29126
Pt26_t1	KK143	6	lib1	Gemcitabine	FIMM023798-003	single	1000	nM	O	3	p2	18860	0.315096
Pt26_t1	KK143	8	lib1	TAS-102	NA	single	1	nM	L	5	p2	76140	1.33402
Pt26_t1	KK143	8	lib1	TAS-102	NA	single	3	nM	K	5	p2	58529	1.02075
Pt26_t1	KK143	8	lib1	TAS-102	NA	single	10	nM	J	5	p2	59610	1.03998
Pt26_t1	KK143	8	lib1	TAS-102	NA	single	30	nM	I	5	p2	58010	1.01152
Pt26_t1	KK143	8	lib1	TAS-102	NA	single	100	nM	H	5	p2	67800	1.18567
Pt26_t1	KK143	8	lib1	TAS-102	NA	single	300	nM	G	5	p2	62429	1.09012
Pt26_t1	KK143	8	lib1	TAS-102	NA	single	1000	nM	F	5	p2	55010	0.958152
Pt26_t1	KK143	8	lib1	TAS-102	NA	single	3000	nM	E	5	p2	41780	0.722809
Pt26_t1	KK143	8	lib1	TAS-102	NA	single	10000	nM	D	5	p2	39980	0.69079
Pt26_t1	KK143	9	lib1	Afatinib	FIMM003710-001	single	0.1	nM	E	6	p2	61110	1.06666
Pt26_t1	KK143	9	lib1	Afatinib	FIMM003710-001	single	0.3	nM	D	6	p2	64440	1.1259
Pt26_t1	KK143	9	lib1	Afatinib	FIMM003710-001	single	1	nM	C	6	p2	65240	1.14013
Pt26_t1	KK143	9	lib1	Afatinib	FIMM003710-001	single	3	nM	B	6	p2	54270	0.944988
Pt26_t1	KK143	9	lib1	Afatinib	FIMM003710-001	single	10	nM	P	5	p2	53429	0.930028
Pt26_t1	KK143	9	lib1	Afatinib	FIMM003710-001	single	30	nM	A	6	p2	31680	0.543145
Pt26_t1	KK143	9	lib1	Afatinib	FIMM003710-001	single	100	nM	O	5	p2	23580	0.399058
Pt26_t1	KK143	9	lib1	Afatinib	FIMM003710-001	single	300	nM	N	5	p2	17740	0.295173
Pt26_t1	KK143	9	lib1	Afatinib	FIMM003710-001	single	1000	nM	M	5	p2	15440	0.254259
Pt26_t1	KK143	nc	lib1	DMSO	NA	control_negative	0.1	percent	A	2	p2	51010	0.886998
Pt26_t1	KK143	nc	lib1	DMSO	NA	control_negative	0.1	percent	A	12	p2	55450	0.965979
Pt26_t1	KK143	nc	lib1	DMSO	NA	control_negative	0.1	percent	C	5	p2	54190	0.943565
Pt26_t1	KK143	nc	lib1	DMSO	NA	control_negative	0.1	percent	C	20	p2	58170	1.01436
Pt26_t1	KK143	nc	lib1	DMSO	NA	control_negative	0.1	percent	F	9	p2	58090	1.01294
Pt26_t1	KK143	nc	lib1	DMSO	NA	control_negative	0.1	percent	F	15	p2	57790	1.0076
Pt26_t1	KK143	nc	lib1	DMSO	NA	control_negative	0.1	percent	I	7	p2	60670	1.05883
Pt26_t1	KK143	nc	lib1	DMSO	NA	control_negative	0.1	percent	I	13	p2	34900	0.600424
Pt26_t1	KK143	nc	lib1	DMSO	NA	control_negative	0.1	percent	I	19	p2	52729	0.917576
Pt26_t1	KK143	nc	lib1	DMSO	NA	control_negative	0.1	percent	L	8	p2	65320	1.14155
Pt26_t1	KK143	nc	lib1	DMSO	NA	control_negative	0.1	percent	L	17	p2	61850	1.07983
Pt26_t1	KK143	nc	lib1	DMSO	NA	control_negative	0.1	percent	P	3	p2	61010	1.06488
Pt26_t1	KK143	nc	lib1	DMSO	NA	control_negative	0.1	percent	P	22	p2	60029	1.04743
Pt26_t1	KK143	pc	lib1	BzCl	NA	control_positive	100000	nM	A	16	p2	1739	0.0105387
Pt26_t1	KK143	pc	lib1	BzCl	NA	control_positive	100000	nM	A	22	p2	1060	-0.0015397
Pt26_t1	KK143	pc	lib1	BzCl	NA	control_positive	100000	nM	F	6	p2	1260	0.00201801
Pt26_t1	KK143	pc	lib1	BzCl	NA	control_positive	100000	nM	I	4	p2	1000	-0.00260701
Pt26_t1	KK143	pc	lib1	BzCl	NA	control_positive	100000	nM	I	10	p2	1280	0.00237378
Pt26_t1	KK143	pc	lib1	BzCl	NA	control_positive	100000	nM	L	14	p2	980	-0.00296278
Pt26_t1	KK143	pc	lib1	BzCl	NA	control_positive	100000	nM	O	12	p2	1160	0.000239157
Pt26_t1	KK143	pc	lib1	BzCl	NA	control_positive	100000	nM	O	21	p2	1280	0.00237378
Pt26_t1	KK143	pc	lib1	BzCl	NA	control_positive	100000	nM	P	18	p2	560	-0.010434
Pt26_t2	KK138	1	lib1	5-FU	FIMM000439-004	combo	1	nM	I	1	p1	143240	1.0104
Pt26_t2	KK138	1	lib1	5-FU	FIMM000439-004	combo	3	nM	H	1	p1	139790	0.985614
Pt26_t2	KK138	1	lib1	5-FU	FIMM000439-004	combo	10	nM	G	1	p1	159080	1.12418
Pt26_t2	KK138	1	lib1	5-FU	FIMM000439-004	combo	30	nM	F	1	p1	162530	1.14896
Pt26_t2	KK138	1	lib1	5-FU	FIMM000439-004	combo	100	nM	D	1	p1	91300	0.637299
Pt26_t2	KK138	1	lib1	5-FU	FIMM000439-004	combo	1000	nM	B	1	p1	36720	0.245238
Pt26_t2	KK138	1	lib1	5-FU	FIMM000439-004	combo	3000	nM	C	1	p1	32400	0.214206
Pt26_t2	KK138	1	lib1	Gemcitabine	FIMM023798-003	combo	0.1	nM	I	1	p1	143240	1.0104
Pt26_t2	KK138	1	lib1	Gemcitabine	FIMM023798-003	combo	0.3	nM	H	1	p1	139790	0.985614
Pt26_t2	KK138	1	lib1	Gemcitabine	FIMM023798-003	combo	1	nM	G	1	p1	159080	1.12418
Pt26_t2	KK138	1	lib1	Gemcitabine	FIMM023798-003	combo	3	nM	F	1	p1	162530	1.14896
Pt26_t2	KK138	1	lib1	Gemcitabine	FIMM023798-003	combo	10	nM	D	1	p1	91300	0.637299
Pt26_t2	KK138	1	lib1	Gemcitabine	FIMM023798-003	combo	100	nM	B	1	p1	36720	0.245238
Pt26_t2	KK138	1	lib1	Gemcitabine	FIMM023798-003	combo	300	nM	C	1	p1	32400	0.214206
Pt26_t2	KK138	10	lib1	Lapatinib	FIMM000274-003	single	0.1	nM	O	6	p1	165650	1.17137
Pt26_t2	KK138	10	lib1	Lapatinib	FIMM000274-003	single	0.3	nM	N	6	p1	150750	1.06434
Pt26_t2	KK138	10	lib1	Lapatinib	FIMM000274-003	single	1	nM	M	6	p1	148890	1.05098
Pt26_t2	KK138	10	lib1	Lapatinib	FIMM000274-003	single	3	nM	L	6	p1	158240	1.11814
Pt26_t2	KK138	10	lib1	Lapatinib	FIMM000274-003	single	10	nM	K	6	p1	141210	0.995814
Pt26_t2	KK138	10	lib1	Lapatinib	FIMM000274-003	single	30	nM	J	6	p1	94820	0.662584
Pt26_t2	KK138	10	lib1	Lapatinib	FIMM000274-003	single	100	nM	I	6	p1	65540	0.452259
Pt26_t2	KK138	10	lib1	Lapatinib	FIMM000274-003	single	300	nM	H	6	p1	45510	0.308379
Pt26_t2	KK138	10	lib1	Lapatinib	FIMM000274-003	single	1000	nM	G	6	p1	39100	0.262334
Pt26_t2	KK138	11	lib1	Binimetinib	FIMM100407-001	single	0.1	nM	H	7	p1	176910	1.25226
Pt26_t2	KK138	11	lib1	Binimetinib	FIMM100407-001	single	0.3	nM	G	7	p1	169020	1.19558
Pt26_t2	KK138	11	lib1	Binimetinib	FIMM100407-001	single	1	nM	F	7	p1	179880	1.27359
Pt26_t2	KK138	11	lib1	Binimetinib	FIMM100407-001	single	3	nM	E	7	p1	152070	1.07382
Pt26_t2	KK138	11	lib1	Binimetinib	FIMM100407-001	single	10	nM	D	7	p1	110140	0.772631
Pt26_t2	KK138	11	lib1	Binimetinib	FIMM100407-001	single	30	nM	C	7	p1	126130	0.887491
Pt26_t2	KK138	11	lib1	Binimetinib	FIMM100407-001	single	100	nM	B	7	p1	116500	0.818316
Pt26_t2	KK138	11	lib1	Binimetinib	FIMM100407-001	single	300	nM	A	7	p1	62290	0.428913
Pt26_t2	KK138	11	lib1	Binimetinib	FIMM100407-001	single	1000	nM	P	6	p1	44300	0.299687
Pt26_t2	KK138	12	lib1	Sirolimus	FIMM023795-004	single	0.01	nM	B	8	p1	157680	1.11412
Pt26_t2	KK138	12	lib1	Sirolimus	FIMM023795-004	single	0.03	nM	A	8	p1	127080	0.894315
Pt26_t2	KK138	12	lib1	Sirolimus	FIMM023795-004	single	0.1	nM	P	7	p1	128340	0.903366
Pt26_t2	KK138	12	lib1	Sirolimus	FIMM023795-004	single	0.3	nM	O	7	p1	168880	1.19457
Pt26_t2	KK138	12	lib1	Sirolimus	FIMM023795-004	single	1	nM	N	7	p1	121630	0.855166
Pt26_t2	KK138	12	lib1	Sirolimus	FIMM023795-004	single	3	nM	M	7	p1	104950	0.73535
Pt26_t2	KK138	12	lib1	Sirolimus	FIMM023795-004	single	10	nM	L	7	p1	119950	0.843099
Pt26_t2	KK138	12	lib1	Sirolimus	FIMM023795-004	single	30	nM	K	7	p1	107470	0.753452
Pt26_t2	KK138	13	lib1	Alisertib	FIMM003761-002	single	1	nM	K	8	p1	173690	1.22913
Pt26_t2	KK138	13	lib1	Alisertib	FIMM003761-002	single	3	nM	J	8	p1	152530	1.07713
Pt26_t2	KK138	13	lib1	Alisertib	FIMM003761-002	single	10	nM	I	8	p1	171560	1.21383
Pt26_t2	KK138	13	lib1	Alisertib	FIMM003761-002	single	30	nM	H	8	p1	148490	1.04811
Pt26_t2	KK138	13	lib1	Alisertib	FIMM003761-002	single	100	nM	G	8	p1	95880	0.670198
Pt26_t2	KK138	13	lib1	Alisertib	FIMM003761-002	single	300	nM	F	8	p1	105030	0.735925
Pt26_t2	KK138	13	lib1	Alisertib	FIMM003761-002	single	1000	nM	E	8	p1	88370	0.616252
Pt26_t2	KK138	13	lib1	Alisertib	FIMM003761-002	single	3000	nM	D	8	p1	92600	0.646637
Pt26_t2	KK138	13	lib1	Alisertib	FIMM003761-002	single	10000	nM	C	8	p1	70360	0.486882
Pt26_t2	KK138	14	lib1	Navitoclax	FIMM003707-003	single	1	nM	E	9	p1	165210	1.16821
Pt26_t2	KK138	14	lib1	Navitoclax	FIMM003707-003	single	3	nM	D	9	p1	162950	1.15198
Pt26_t2	KK138	14	lib1	Navitoclax	FIMM003707-003	single	10	nM	C	9	p1	152690	1.07828
Pt26_t2	KK138	14	lib1	Navitoclax	FIMM003707-003	single	30	nM	B	9	p1	168780	1.19386
Pt26_t2	KK138	14	lib1	Navitoclax	FIMM003707-003	single	100	nM	A	9	p1	132080	0.930231
Pt26_t2	KK138	14	lib1	Navitoclax	FIMM003707-003	single	300	nM	P	8	p1	122890	0.864217
Pt26_t2	KK138	14	lib1	Navitoclax	FIMM003707-003	single	1000	nM	O	8	p1	105690	0.740666
Pt26_t2	KK138	14	lib1	Navitoclax	FIMM003707-003	single	3000	nM	N	8	p1	61050	0.420006
Pt26_t2	KK138	14	lib1	Navitoclax	FIMM003707-003	single	10000	nM	M	8	p1	29680	0.194668
Pt26_t2	KK138	15	lib1	Atorvastatin	FIMM109447-001	single	1	nM	O	9	p1	152450	1.07655
Pt26_t2	KK138	15	lib1	Atorvastatin	FIMM109447-001	single	3	nM	N	9	p1	155060	1.0953
Pt26_t2	KK138	15	lib1	Atorvastatin	FIMM109447-001	single	10	nM	M	9	p1	153130	1.08144
Pt26_t2	KK138	15	lib1	Atorvastatin	FIMM109447-001	single	30	nM	L	9	p1	164950	1.16634
Pt26_t2	KK138	15	lib1	Atorvastatin	FIMM109447-001	single	100	nM	K	9	p1	128020	0.901067
Pt26_t2	KK138	15	lib1	Atorvastatin	FIMM109447-001	single	300	nM	J	9	p1	116380	0.817454
Pt26_t2	KK138	15	lib1	Atorvastatin	FIMM109447-001	single	1000	nM	I	9	p1	102670	0.718972
Pt26_t2	KK138	15	lib1	Atorvastatin	FIMM109447-001	single	3000	nM	H	9	p1	80350	0.558643
Pt26_t2	KK138	15	lib1	Atorvastatin	FIMM109447-001	single	10000	nM	G	9	p1	62110	0.42762
Pt26_t2	KK138	16	lib1	Luminespib	FIMM003764-001	single	0.1	nM	H	10	p1	159580	1.12777
Pt26_t2	KK138	16	lib1	Luminespib	FIMM003764-001	single	0.3	nM	G	10	p1	171280	1.21181
Pt26_t2	KK138	16	lib1	Luminespib	FIMM003764-001	single	1	nM	F	10	p1	179040	1.26756
Pt26_t2	KK138	16	lib1	Luminespib	FIMM003764-001	single	3	nM	E	10	p1	173160	1.22532
Pt26_t2	KK138	16	lib1	Luminespib	FIMM003764-001	single	10	nM	D	10	p1	76100	0.528114
Pt26_t2	KK138	16	lib1	Luminespib	FIMM003764-001	single	30	nM	C	10	p1	30680	0.201851
Pt26_t2	KK138	16	lib1	Luminespib	FIMM003764-001	single	100	nM	B	10	p1	28720	0.187772
Pt26_t2	KK138	16	lib1	Luminespib	FIMM003764-001	single	300	nM	A	10	p1	20560	0.129157
Pt26_t2	KK138	16	lib1	Luminespib	FIMM003764-001	single	1000	nM	P	9	p1	19300	0.120106
Pt26_t2	KK138	17	lib1	Palbociclib	FIMM003705-003	single	1	nM	B	11	p1	168920	1.19486
Pt26_t2	KK138	17	lib1	Palbociclib	FIMM003705-003	single	3	nM	A	11	p1	133600	0.94115
Pt26_t2	KK138	17	lib1	Palbociclib	FIMM003705-003	single	10	nM	P	10	p1	113620	0.797629
Pt26_t2	KK138	17	lib1	Palbociclib	FIMM003705-003	single	30	nM	O	10	p1	184000	1.30318
Pt26_t2	KK138	17	lib1	Palbociclib	FIMM003705-003	single	100	nM	N	10	p1	100530	0.7036
Pt26_t2	KK138	17	lib1	Palbociclib	FIMM003705-003	single	300	nM	M	10	p1	70940	0.491048
Pt26_t2	KK138	17	lib1	Palbociclib	FIMM003705-003	single	1000	nM	L	10	p1	94820	0.662584
Pt26_t2	KK138	17	lib1	Palbociclib	FIMM003705-003	single	3000	nM	K	10	p1	106670	0.747705
Pt26_t2	KK138	17	lib1	Palbociclib	FIMM003705-003	single	10000	nM	J	10	p1	148570	1.04868
Pt26_t2	KK138	18	lib1	Methotrexate	FIMM000649-004	single	0.5	nM	K	11	p1	159720	1.12878
Pt26_t2	KK138	18	lib1	Methotrexate	FIMM000649-004	single	1.5	nM	J	11	p1	161390	1.14077
Pt26_t2	KK138	18	lib1	Methotrexate	FIMM000649-004	single	5	nM	I	11	p1	175950	1.24536
Pt26_t2	KK138	18	lib1	Methotrexate	FIMM000649-004	single	15	nM	H	11	p1	141780	0.999909
Pt26_t2	KK138	18	lib1	Methotrexate	FIMM000649-004	single	50	nM	G	11	p1	88910	0.620131
Pt26_t2	KK138	18	lib1	Methotrexate	FIMM000649-004	single	150	nM	F	11	p1	77570	0.538673
Pt26_t2	KK138	18	lib1	Methotrexate	FIMM000649-004	single	500	nM	E	11	p1	74840	0.519063
Pt26_t2	KK138	18	lib1	Methotrexate	FIMM000649-004	single	1500	nM	D	11	p1	66980	0.462603
Pt26_t2	KK138	18	lib1	Methotrexate	FIMM000649-004	single	5000	nM	C	11	p1	68940	0.476682
Pt26_t2	KK138	19	lib1	Panobinostat	FIMM003783-001	single	0.1	nM	E	12	p1	163370	1.15499
Pt26_t2	KK138	19	lib1	Panobinostat	FIMM003783-001	single	0.3	nM	D	12	p1	158380	1.11915
Pt26_t2	KK138	19	lib1	Panobinostat	FIMM003783-001	single	1	nM	C	12	p1	163810	1.15816
Pt26_t2	KK138	19	lib1	Panobinostat	FIMM003783-001	single	3	nM	B	12	p1	175930	1.24522
Pt26_t2	KK138	19	lib1	Panobinostat	FIMM003783-001	single	10	nM	P	11	p1	140890	0.993515
Pt26_t2	KK138	19	lib1	Panobinostat	FIMM003783-001	single	30	nM	O	11	p1	86470	0.602604
Pt26_t2	KK138	19	lib1	Panobinostat	FIMM003783-001	single	100	nM	N	11	p1	6840	0.030603
Pt26_t2	KK138	19	lib1	Panobinostat	FIMM003783-001	single	300	nM	M	11	p1	1480	-0.00789916
Pt26_t2	KK138	19	lib1	Panobinostat	FIMM003783-001	single	1000	nM	L	11	p1	1780	-0.00574419
Pt26_t2	KK138	2	lib1	Erlotinib	FIMM000183-004	single	1	nM	C	2	p1	138690	0.977712
Pt26_t2	KK138	2	lib1	Erlotinib	FIMM000183-004	single	3	nM	B	2	p1	156440	1.10521
Pt26_t2	KK138	2	lib1	Erlotinib	FIMM000183-004	single	10	nM	P	1	p1	101930	0.713657
Pt26_t2	KK138	2	lib1	Erlotinib	FIMM000183-004	single	30	nM	O	1	p1	133240	0.938564
Pt26_t2	KK138	2	lib1	Erlotinib	FIMM000183-004	single	100	nM	N	1	p1	104070	0.729029
Pt26_t2	KK138	2	lib1	Erlotinib	FIMM000183-004	single	300	nM	M	1	p1	59210	0.406789
Pt26_t2	KK138	2	lib1	Erlotinib	FIMM000183-004	single	1000	nM	L	1	p1	29020	0.189927
Pt26_t2	KK138	2	lib1	Erlotinib	FIMM000183-004	single	3000	nM	K	1	p1	32760	0.216792
Pt26_t2	KK138	2	lib1	Erlotinib	FIMM000183-004	single	10000	nM	J	1	p1	25180	0.162343
Pt26_t2	KK138	20	lib1	Olaparib	FIMM003790-001	single	1	nM	N	12	p1	126509	0.890213
Pt26_t2	KK138	20	lib1	Olaparib	FIMM003790-001	single	3	nM	M	12	p1	142880	1.00781
Pt26_t2	KK138	20	lib1	Olaparib	FIMM003790-001	single	10	nM	L	12	p1	157980	1.11628
Pt26_t2	KK138	20	lib1	Olaparib	FIMM003790-001	single	30	nM	K	12	p1	154370	1.09035
Pt26_t2	KK138	20	lib1	Olaparib	FIMM003790-001	single	100	nM	J	12	p1	165390	1.1695
Pt26_t2	KK138	20	lib1	Olaparib	FIMM003790-001	single	300	nM	I	12	p1	157000	1.10924
Pt26_t2	KK138	20	lib1	Olaparib	FIMM003790-001	single	1000	nM	H	12	p1	162090	1.1458
Pt26_t2	KK138	20	lib1	Olaparib	FIMM003790-001	single	3000	nM	G	12	p1	127520	0.897476
Pt26_t2	KK138	21	lib1	Disulfiram+Cu	FIMM000416-004	single	5	nM	H	13	p1	123130	0.865941
Pt26_t2	KK138	21	lib1	Disulfiram+Cu	FIMM000416-004	single	15	nM	G	13	p1	142540	1.00537
Pt26_t2	KK138	21	lib1	Disulfiram+Cu	FIMM000416-004	single	50	nM	F	13	p1	138950	0.97958
Pt26_t2	KK138	21	lib1	Disulfiram+Cu	FIMM000416-004	single	150	nM	E	13	p1	143300	1.01083
Pt26_t2	KK138	21	lib1	Disulfiram+Cu	FIMM000416-004	single	1500	nM	D	13	p1	118550	0.833042
Pt26_t2	KK138	22	lib1	Linsitinib	FIMM003772-002	single	1	nM	B	14	p1	120090	0.844104
Pt26_t2	KK138	22	lib1	Linsitinib	FIMM003772-002	single	3	nM	A	14	p1	129720	0.913279
Pt26_t2	KK138	22	lib1	Linsitinib	FIMM003772-002	single	10	nM	P	13	p1	76220	0.528976
Pt26_t2	KK138	22	lib1	Linsitinib	FIMM003772-002	single	30	nM	O	13	p1	71800	0.497226
Pt26_t2	KK138	22	lib1	Linsitinib	FIMM003772-002	single	100	nM	N	13	p1	83250	0.579474
Pt26_t2	KK138	22	lib1	Linsitinib	FIMM003772-002	single	300	nM	M	13	p1	80830	0.56209
Pt26_t2	KK138	22	lib1	Linsitinib	FIMM003772-002	single	1000	nM	L	13	p1	47010	0.319153
Pt26_t2	KK138	22	lib1	Linsitinib	FIMM003772-002	single	3000	nM	K	13	p1	56890	0.390124
Pt26_t2	KK138	22	lib1	Linsitinib	FIMM003772-002	single	10000	nM	J	13	p1	33520	0.222252
Pt26_t2	KK138	23	lib1	Idasanutlin	FIMM136384-001	single	1	nM	K	14	p1	112520	0.789727
Pt26_t2	KK138	23	lib1	Idasanutlin	FIMM136384-001	single	3	nM	J	14	p1	138610	0.977138
Pt26_t2	KK138	23	lib1	Idasanutlin	FIMM136384-001	single	10	nM	I	14	p1	110140	0.772631
Pt26_t2	KK138	23	lib1	Idasanutlin	FIMM136384-001	single	30	nM	H	14	p1	146580	1.03439
Pt26_t2	KK138	23	lib1	Idasanutlin	FIMM136384-001	single	100	nM	G	14	p1	145380	1.02577
Pt26_t2	KK138	23	lib1	Idasanutlin	FIMM136384-001	single	300	nM	F	14	p1	121150	0.851718
Pt26_t2	KK138	23	lib1	Idasanutlin	FIMM136384-001	single	1000	nM	E	14	p1	138270	0.974695
Pt26_t2	KK138	23	lib1	Idasanutlin	FIMM136384-001	single	3000	nM	D	14	p1	121990	0.857752
Pt26_t2	KK138	23	lib1	Idasanutlin	FIMM136384-001	single	10000	nM	C	14	p1	130640	0.919887
Pt26_t2	KK138	24	lib1	Erastin	FIMM136615-001	single	1	nM	E	15	p1	148390	1.04739
Pt26_t2	KK138	24	lib1	Erastin	FIMM136615-001	single	3	nM	D	15	p1	144960	1.02275
Pt26_t2	KK138	24	lib1	Erastin	FIMM136615-001	single	10	nM	C	15	p1	141070	0.994808
Pt26_t2	KK138	24	lib1	Erastin	FIMM136615-001	single	30	nM	B	15	p1	158680	1.12131
Pt26_t2	KK138	24	lib1	Erastin	FIMM136615-001	single	100	nM	A	15	p1	163230	1.15399
Pt26_t2	KK138	24	lib1	Erastin	FIMM136615-001	single	300	nM	P	14	p1	113500	0.796767
Pt26_t2	KK138	24	lib1	Erastin	FIMM136615-001	single	1000	nM	O	14	p1	100870	0.706042
Pt26_t2	KK138	24	lib1	Erastin	FIMM136615-001	single	3000	nM	N	14	p1	118930	0.835772
Pt26_t2	KK138	25	lib1	2-methoxyestradiol	FIMM003765-001	single	1	nM	O	15	p1	120030	0.843673
Pt26_t2	KK138	25	lib1	2-methoxyestradiol	FIMM003765-001	single	3	nM	N	15	p1	112759	0.791444
Pt26_t2	KK138	25	lib1	2-methoxyestradiol	FIMM003765-001	single	10	nM	M	15	p1	64720	0.446369
Pt26_t2	KK138	25	lib1	2-methoxyestradiol	FIMM003765-001	single	30	nM	L	15	p1	44340	0.299974
Pt26_t2	KK138	25	lib1	2-methoxyestradiol	FIMM003765-001	single	100	nM	K	15	p1	29660	0.194524
Pt26_t2	KK138	25	lib1	2-methoxyestradiol	FIMM003765-001	single	300	nM	J	15	p1	26280	0.170245
Pt26_t2	KK138	25	lib1	2-methoxyestradiol	FIMM003765-001	single	1000	nM	I	15	p1	24280	0.155879
Pt26_t2	KK138	25	lib1	2-methoxyestradiol	FIMM003765-001	single	3000	nM	H	15	p1	29780	0.195386
Pt26_t2	KK138	25	lib1	2-methoxyestradiol	FIMM003765-001	single	10000	nM	G	15	p1	29760	0.195243
Pt26_t2	KK138	26	lib1	Vitamin C	NA	single	1	nM	I	16	p1	114880	0.80668
Pt26_t2	KK138	26	lib1	Vitamin C	NA	single	3	nM	H	16	p1	152030	1.07354
Pt26_t2	KK138	26	lib1	Vitamin C	NA	single	10	nM	G	16	p1	150290	1.06104
Pt26_t2	KK138	26	lib1	Vitamin C	NA	single	30	nM	F	16	p1	142960	1.00838
Pt26_t2	KK138	26	lib1	Vitamin C	NA	single	100	nM	E	16	p1	145260	1.02491
Pt26_t2	KK138	26	lib1	Vitamin C	NA	single	300	nM	D	16	p1	159440	1.12676
Pt26_t2	KK138	26	lib1	Vitamin C	NA	single	1000	nM	C	16	p1	142260	1.00336
Pt26_t2	KK138	26	lib1	Vitamin C	NA	single	3000	nM	B	16	p1	141290	0.996389
Pt26_t2	KK138	26	lib1	Vitamin C	NA	single	10000	nM	P	15	p1	104970	0.735494
Pt26_t2	KK138	27	lib1	Pevonedistat	FIMM115472-001	single	1	nM	B	17	p1	161470	1.14135
Pt26_t2	KK138	27	lib1	Pevonedistat	FIMM115472-001	single	3	nM	A	17	p1	149650	1.05644
Pt26_t2	KK138	27	lib1	Pevonedistat	FIMM115472-001	single	10	nM	P	16	p1	132400	0.93253
Pt26_t2	KK138	27	lib1	Pevonedistat	FIMM115472-001	single	30	nM	O	16	p1	112859	0.792162
Pt26_t2	KK138	27	lib1	Pevonedistat	FIMM115472-001	single	100	nM	N	16	p1	97760	0.683703
Pt26_t2	KK138	27	lib1	Pevonedistat	FIMM115472-001	single	300	nM	M	16	p1	76500	0.530987
Pt26_t2	KK138	27	lib1	Pevonedistat	FIMM115472-001	single	1000	nM	L	16	p1	55890	0.382941
Pt26_t2	KK138	27	lib1	Pevonedistat	FIMM115472-001	single	3000	nM	K	16	p1	27580	0.179583
Pt26_t2	KK138	27	lib1	Pevonedistat	FIMM115472-001	single	10000	nM	J	16	p1	23100	0.147402
Pt26_t2	KK138	28	lib1	Gedatolisib	FIMM133857-001	single	0.1	nM	K	17	p1	132700	0.934685
Pt26_t2	KK138	28	lib1	Gedatolisib	FIMM133857-001	single	0.3	nM	J	17	p1	141190	0.99567
Pt26_t2	KK138	28	lib1	Gedatolisib	FIMM133857-001	single	1	nM	I	17	p1	105770	0.74124
Pt26_t2	KK138	28	lib1	Gedatolisib	FIMM133857-001	single	3	nM	H	17	p1	142220	1.00307
Pt26_t2	KK138	28	lib1	Gedatolisib	FIMM133857-001	single	10	nM	G	17	p1	167720	1.18624
Pt26_t2	KK138	28	lib1	Gedatolisib	FIMM133857-001	single	30	nM	F	17	p1	151330	1.06851
Pt26_t2	KK138	28	lib1	Gedatolisib	FIMM133857-001	single	100	nM	E	17	p1	135450	0.954439
Pt26_t2	KK138	28	lib1	Gedatolisib	FIMM133857-001	single	300	nM	D	17	p1	64400	0.44407
Pt26_t2	KK138	28	lib1	Gedatolisib	FIMM133857-001	single	1000	nM	C	17	p1	40920	0.275408
Pt26_t2	KK138	29	lib1	Volasertib	FIMM100375-001	single	0.1	nM	E	18	p1	161120	1.13883
Pt26_t2	KK138	29	lib1	Volasertib	FIMM100375-001	single	0.3	nM	D	18	p1	136770	0.963921
Pt26_t2	KK138	29	lib1	Volasertib	FIMM100375-001	single	1	nM	C	18	p1	132880	0.935978
Pt26_t2	KK138	29	lib1	Volasertib	FIMM100375-001	single	3	nM	B	18	p1	147040	1.03769
Pt26_t2	KK138	29	lib1	Volasertib	FIMM100375-001	single	10	nM	P	17	p1	68220	0.47151
Pt26_t2	KK138	29	lib1	Volasertib	FIMM100375-001	single	30	nM	A	18	p1	38160	0.255582
Pt26_t2	KK138	29	lib1	Volasertib	FIMM100375-001	single	100	nM	O	17	p1	22160	0.14065
Pt26_t2	KK138	29	lib1	Volasertib	FIMM100375-001	single	300	nM	N	17	p1	30139	0.197965
Pt26_t2	KK138	29	lib1	Volasertib	FIMM100375-001	single	1000	nM	M	17	p1	17660	0.108326
Pt26_t2	KK138	3	lib1	Encorafenib	FIMM136367-001	single	0.1	nM	K	2	p1	147240	1.03913
Pt26_t2	KK138	3	lib1	Encorafenib	FIMM136367-001	single	0.3	nM	L	2	p1	152370	1.07598
Pt26_t2	KK138	3	lib1	Encorafenib	FIMM136367-001	single	1	nM	I	2	p1	160160	1.13194
Pt26_t2	KK138	3	lib1	Encorafenib	FIMM136367-001	single	3	nM	J	2	p1	152270	1.07526
Pt26_t2	KK138	3	lib1	Encorafenib	FIMM136367-001	single	10	nM	G	2	p1	163570	1.15643
Pt26_t2	KK138	3	lib1	Encorafenib	FIMM136367-001	single	30	nM	H	2	p1	152710	1.07842
Pt26_t2	KK138	3	lib1	Encorafenib	FIMM136367-001	single	100	nM	E	2	p1	171320	1.2121
Pt26_t2	KK138	3	lib1	Encorafenib	FIMM136367-001	single	300	nM	F	2	p1	153670	1.08532
Pt26_t2	KK138	3	lib1	Encorafenib	FIMM136367-001	single	1000	nM	D	2	p1	80390	0.55893
Pt26_t2	KK138	30	lib1	Tretinoin	FIMM000249-005	single	1	nM	N	18	p1	119950	0.843099
Pt26_t2	KK138	30	lib1	Tretinoin	FIMM000249-005	single	3	nM	M	18	p1	161530	1.14178
Pt26_t2	KK138	30	lib1	Tretinoin	FIMM000249-005	single	10	nM	L	18	p1	121890	0.857034
Pt26_t2	KK138	30	lib1	Tretinoin	FIMM000249-005	single	30	nM	K	18	p1	148120	1.04545
Pt26_t2	KK138	30	lib1	Tretinoin	FIMM000249-005	single	100	nM	J	18	p1	145020	1.02318
Pt26_t2	KK138	30	lib1	Tretinoin	FIMM000249-005	single	300	nM	I	18	p1	124509	0.875847
Pt26_t2	KK138	30	lib1	Tretinoin	FIMM000249-005	single	1000	nM	H	18	p1	143020	1.00882
Pt26_t2	KK138	30	lib1	Tretinoin	FIMM000249-005	single	3000	nM	G	18	p1	141800	1.00005
Pt26_t2	KK138	30	lib1	Tretinoin	FIMM000249-005	single	10000	nM	F	18	p1	118970	0.836059
Pt26_t2	KK138	31	lib1	Napabucasin	FIMM136507-001	single	2	nM	H	19	p1	145040	1.02333
Pt26_t2	KK138	31	lib1	Napabucasin	FIMM136507-001	single	6	nM	G	19	p1	123709	0.8701
Pt26_t2	KK138	31	lib1	Napabucasin	FIMM136507-001	single	20	nM	F	19	p1	149110	1.05256
Pt26_t2	KK138	31	lib1	Napabucasin	FIMM136507-001	single	60	nM	E	19	p1	162250	1.14695
Pt26_t2	KK138	31	lib1	Napabucasin	FIMM136507-001	single	200	nM	D	19	p1	149630	1.0563
Pt26_t2	KK138	31	lib1	Napabucasin	FIMM136507-001	single	600	nM	C	19	p1	133760	0.942299
Pt26_t2	KK138	31	lib1	Napabucasin	FIMM136507-001	single	2000	nM	B	19	p1	40540	0.272678
Pt26_t2	KK138	31	lib1	Napabucasin	FIMM136507-001	single	6000	nM	A	19	p1	1540	-0.00746817
Pt26_t2	KK138	31	lib1	Napabucasin	FIMM136507-001	single	20000	nM	O	18	p1	1460	-0.00804283
Pt26_t2	KK138	32	lib1	LCL161	FIMM133892-001	single	2.5	nM	B	20	p1	142200	1.00293
Pt26_t2	KK138	32	lib1	LCL161	FIMM133892-001	single	7.5	nM	A	20	p1	158880	1.12274
Pt26_t2	KK138	32	lib1	LCL161	FIMM133892-001	single	250	nM	N	19	p1	111220	0.780389
Pt26_t2	KK138	32	lib1	LCL161	FIMM133892-001	single	750	nM	M	19	p1	117300	0.824063
Pt26_t2	KK138	32	lib1	LCL161	FIMM133892-001	single	25000	nM	J	19	p1	79230	0.550597
Pt26_t2	KK138	33	lib1	Eltanexor	FIMM136587-001	single	1	nM	L	20	p1	121290	0.852724
Pt26_t2	KK138	33	lib1	Eltanexor	FIMM136587-001	single	3	nM	K	20	p1	137210	0.967081
Pt26_t2	KK138	33	lib1	Eltanexor	FIMM136587-001	single	10	nM	J	20	p1	142400	1.00436
Pt26_t2	KK138	33	lib1	Eltanexor	FIMM136587-001	single	30	nM	I	20	p1	147260	1.03927
Pt26_t2	KK138	33	lib1	Eltanexor	FIMM136587-001	single	100	nM	H	20	p1	125930	0.886054
Pt26_t2	KK138	33	lib1	Eltanexor	FIMM136587-001	single	300	nM	G	20	p1	84090	0.585508
Pt26_t2	KK138	33	lib1	Eltanexor	FIMM136587-001	single	1000	nM	F	20	p1	51690	0.352771
Pt26_t2	KK138	33	lib1	Eltanexor	FIMM136587-001	single	3000	nM	E	20	p1	52210	0.356506
Pt26_t2	KK138	33	lib1	Eltanexor	FIMM136587-001	single	10000	nM	D	20	p1	41980	0.283022
Pt26_t2	KK138	34	lib1	Bemcentinib	FIMM136394-002	single	1	nM	E	21	p1	163930	1.15902
Pt26_t2	KK138	34	lib1	Bemcentinib	FIMM136394-002	single	3	nM	D	21	p1	158060	1.11685
Pt26_t2	KK138	34	lib1	Bemcentinib	FIMM136394-002	single	10	nM	C	21	p1	142340	1.00393
Pt26_t2	KK138	34	lib1	Bemcentinib	FIMM136394-002	single	30	nM	B	21	p1	118690	0.834048
Pt26_t2	KK138	34	lib1	Bemcentinib	FIMM136394-002	single	100	nM	P	20	p1	155020	1.09501
Pt26_t2	KK138	34	lib1	Bemcentinib	FIMM136394-002	single	300	nM	A	21	p1	123050	0.865367
Pt26_t2	KK138	34	lib1	Bemcentinib	FIMM136394-002	single	1000	nM	O	20	p1	124990	0.879302
Pt26_t2	KK138	34	lib1	Bemcentinib	FIMM136394-002	single	3000	nM	N	20	p1	118390	0.831893
Pt26_t2	KK138	34	lib1	Bemcentinib	FIMM136394-002	single	10000	nM	M	20	p1	35260	0.23475
Pt26_t2	KK138	35	lib1	Regorafenib	FIMM100364-001	single	1	nM	N	21	p1	152530	1.07713
Pt26_t2	KK138	35	lib1	Regorafenib	FIMM100364-001	single	3	nM	M	21	p1	136550	0.96234
Pt26_t2	KK138	35	lib1	Regorafenib	FIMM100364-001	single	10	nM	L	21	p1	125050	0.879733
Pt26_t2	KK138	35	lib1	Regorafenib	FIMM100364-001	single	30	nM	K	21	p1	157800	1.11498
Pt26_t2	KK138	35	lib1	Regorafenib	FIMM100364-001	single	100	nM	J	21	p1	160780	1.13639
Pt26_t2	KK138	35	lib1	Regorafenib	FIMM100364-001	single	300	nM	I	21	p1	140830	0.993085
Pt26_t2	KK138	35	lib1	Regorafenib	FIMM100364-001	single	1000	nM	H	21	p1	149190	1.05314
Pt26_t2	KK138	35	lib1	Regorafenib	FIMM100364-001	single	3000	nM	G	21	p1	130820	0.92118
Pt26_t2	KK138	35	lib1	Regorafenib	FIMM100364-001	single	10000	nM	F	21	p1	89740	0.626093
Pt26_t2	KK138	36	lib1	AZD7762	FIMM003741-001	single	0.1	nM	I	22	p1	129659	0.912841
Pt26_t2	KK138	36	lib1	AZD7762	FIMM003741-001	single	0.3	nM	H	22	p1	129200	0.909543
Pt26_t2	KK138	36	lib1	AZD7762	FIMM003741-001	single	1	nM	G	22	p1	146180	1.03151
Pt26_t2	KK138	36	lib1	AZD7762	FIMM003741-001	single	3	nM	F	22	p1	148240	1.04631
Pt26_t2	KK138	36	lib1	AZD7762	FIMM003741-001	single	10	nM	E	22	p1	146060	1.03065
Pt26_t2	KK138	36	lib1	AZD7762	FIMM003741-001	single	30	nM	D	22	p1	155280	1.09688
Pt26_t2	KK138	36	lib1	AZD7762	FIMM003741-001	single	100	nM	C	22	p1	89430	0.623866
Pt26_t2	KK138	36	lib1	AZD7762	FIMM003741-001	single	300	nM	B	22	p1	29460	0.193088
Pt26_t2	KK138	36	lib1	AZD7762	FIMM003741-001	single	1000	nM	P	21	p1	15900	0.0956831
Pt26_t2	KK138	37	lib1	Crizotinib	FIMM003713-001	single	0.1	nM	C	23	p1	132260	0.931524
Pt26_t2	KK138	37	lib1	Crizotinib	FIMM003713-001	single	0.3	nM	B	23	p1	133240	0.938564
Pt26_t2	KK138	37	lib1	Crizotinib	FIMM003713-001	single	1	nM	O	22	p1	116520	0.81846
Pt26_t2	KK138	37	lib1	Crizotinib	FIMM003713-001	single	3	nM	A	23	p1	145880	1.02936
Pt26_t2	KK138	37	lib1	Crizotinib	FIMM003713-001	single	10	nM	N	22	p1	142400	1.00436
Pt26_t2	KK138	37	lib1	Crizotinib	FIMM003713-001	single	30	nM	M	22	p1	130780	0.920893
Pt26_t2	KK138	37	lib1	Crizotinib	FIMM003713-001	single	100	nM	L	22	p1	114300	0.802513
Pt26_t2	KK138	37	lib1	Crizotinib	FIMM003713-001	single	300	nM	K	22	p1	147980	1.04444
Pt26_t2	KK138	37	lib1	Crizotinib	FIMM003713-001	single	1000	nM	J	22	p1	147980	1.04444
Pt26_t2	KK138	38	lib1	LGK974	FIMM136372-001	single	1	nM	L	23	p1	131640	0.927071
Pt26_t2	KK138	38	lib1	LGK974	FIMM136372-001	single	3	nM	K	23	p1	149990	1.05888
Pt26_t2	KK138	38	lib1	LGK974	FIMM136372-001	single	10	nM	J	23	p1	135910	0.957743
Pt26_t2	KK138	38	lib1	LGK974	FIMM136372-001	single	30	nM	I	23	p1	114820	0.806249
Pt26_t2	KK138	38	lib1	LGK974	FIMM136372-001	single	100	nM	H	23	p1	161770	1.1435
Pt26_t2	KK138	38	lib1	LGK974	FIMM136372-001	single	300	nM	G	23	p1	165730	1.17195
Pt26_t2	KK138	38	lib1	LGK974	FIMM136372-001	single	1000	nM	F	23	p1	149090	1.05242
Pt26_t2	KK138	38	lib1	LGK974	FIMM136372-001	single	3000	nM	E	23	p1	136970	0.965357
Pt26_t2	KK138	38	lib1	LGK974	FIMM136372-001	single	10000	nM	D	23	p1	103530	0.72515
Pt26_t2	KK138	4	lib1	5-FU	FIMM000439-004	single	1	nM	E	3	p1	159980	1.13064
Pt26_t2	KK138	4	lib1	5-FU	FIMM000439-004	single	3	nM	D	3	p1	152710	1.07842
Pt26_t2	KK138	4	lib1	5-FU	FIMM000439-004	single	10	nM	C	3	p1	163570	1.15643
Pt26_t2	KK138	4	lib1	5-FU	FIMM000439-004	single	30	nM	B	3	p1	173100	1.22489
Pt26_t2	KK138	4	lib1	5-FU	FIMM000439-004	single	100	nM	P	2	p1	121170	0.851862
Pt26_t2	KK138	4	lib1	5-FU	FIMM000439-004	single	300	nM	A	3	p1	131720	0.927645
Pt26_t2	KK138	4	lib1	5-FU	FIMM000439-004	single	1000	nM	O	2	p1	126880	0.892878
Pt26_t2	KK138	4	lib1	5-FU	FIMM000439-004	single	3000	nM	N	2	p1	104209	0.730027
Pt26_t2	KK138	4	lib1	5-FU	FIMM000439-004	single	10000	nM	M	2	p1	67820	0.468637
Pt26_t2	KK138	40	lib1	Trametinib	FIMM003751-001	single	0.025	nM	G	24	p1	128980	0.907963
Pt26_t2	KK138	40	lib1	Trametinib	FIMM003751-001	single	0.075	nM	F	24	p1	156960	1.10895
Pt26_t2	KK138	40	lib1	Trametinib	FIMM003751-001	single	0.25	nM	E	24	p1	120670	0.848271
Pt26_t2	KK138	40	lib1	Trametinib	FIMM003751-001	single	0.75	nM	D	24	p1	136390	0.961191
Pt26_t2	KK138	40	lib1	Trametinib	FIMM003751-001	single	2.5	nM	C	24	p1	97700	0.683272
Pt26_t2	KK138	40	lib1	Trametinib	FIMM003751-001	single	7.5	nM	B	24	p1	58490	0.401617
Pt26_t2	KK138	40	lib1	Trametinib	FIMM003751-001	single	25	nM	A	24	p1	50170	0.341853
Pt26_t2	KK138	40	lib1	Trametinib	FIMM003751-001	single	75	nM	P	23	p1	31180	0.205443
Pt26_t2	KK138	40	lib1	Trametinib	FIMM003751-001	single	250	nM	O	23	p1	22920	0.146109
Pt26_t2	KK138	41	lib1	Ipatasertib	FIMM115486-003	single	1	nM	P	24	p1	83030	0.577894
Pt26_t2	KK138	41	lib1	Ipatasertib	FIMM115486-003	single	3	nM	O	24	p1	95080	0.664452
Pt26_t2	KK138	41	lib1	Ipatasertib	FIMM115486-003	single	10	nM	N	24	p1	111959	0.785697
Pt26_t2	KK138	41	lib1	Ipatasertib	FIMM115486-003	single	30	nM	M	24	p1	117700	0.826936
Pt26_t2	KK138	41	lib1	Ipatasertib	FIMM115486-003	single	100	nM	L	24	p1	128200	0.90236
Pt26_t2	KK138	41	lib1	Ipatasertib	FIMM115486-003	single	300	nM	K	24	p1	108470	0.760635
Pt26_t2	KK138	41	lib1	Ipatasertib	FIMM115486-003	single	1000	nM	J	24	p1	88010	0.613666
Pt26_t2	KK138	41	lib1	Ipatasertib	FIMM115486-003	single	3000	nM	I	24	p1	48350	0.328779
Pt26_t2	KK138	41	lib1	Ipatasertib	FIMM115486-003	single	10000	nM	H	24	p1	33840	0.22455
Pt26_t2	KK138	42	lib1	Cetuximab	NA	single	35	nM	M	23	p1	44790	0.303207
Pt26_t2	KK138	42	lib1	Cetuximab	NA	single	350	nM	N	23	p1	36880	0.246387
Pt26_t2	KK138	5	lib1	SN-38	FIMM002374-001	single	1	nM	N	3	p1	141660	0.999047
Pt26_t2	KK138	5	lib1	SN-38	FIMM002374-001	single	3	nM	M	3	p1	71940	0.498232
Pt26_t2	KK138	5	lib1	SN-38	FIMM002374-001	single	100	nM	J	3	p1	21520	0.136053
Pt26_t2	KK138	5	lib1	SN-38	FIMM002374-001	single	300	nM	I	3	p1	16420	0.0994184
Pt26_t2	KK138	5	lib1	SN-38	FIMM002374-001	single	10000	nM	F	3	p1	7900	0.0382172
Pt26_t2	KK138	6	lib1	Gemcitabine	FIMM023798-003	single	0.1	nM	H	4	p1	157920	1.11585
Pt26_t2	KK138	6	lib1	Gemcitabine	FIMM023798-003	single	0.3	nM	G	4	p1	145960	1.02993
Pt26_t2	KK138	6	lib1	Gemcitabine	FIMM023798-003	single	1	nM	F	4	p1	163270	1.15428
Pt26_t2	KK138	6	lib1	Gemcitabine	FIMM023798-003	single	3	nM	E	4	p1	166170	1.17511
Pt26_t2	KK138	6	lib1	Gemcitabine	FIMM023798-003	single	10	nM	D	4	p1	116140	0.81573
Pt26_t2	KK138	6	lib1	Gemcitabine	FIMM023798-003	single	30	nM	C	4	p1	56210	0.385239
Pt26_t2	KK138	6	lib1	Gemcitabine	FIMM023798-003	single	100	nM	B	4	p1	44120	0.298394
Pt26_t2	KK138	6	lib1	Gemcitabine	FIMM023798-003	single	300	nM	A	4	p1	22120	0.140363
Pt26_t2	KK138	6	lib1	Gemcitabine	FIMM023798-003	single	1000	nM	O	3	p1	18220	0.112348
Pt26_t2	KK138	8	lib1	TAS-102	NA	single	1	nM	L	5	p1	167560	1.18509
Pt26_t2	KK138	8	lib1	TAS-102	NA	single	3	nM	K	5	p1	162110	1.14594
Pt26_t2	KK138	8	lib1	TAS-102	NA	single	10	nM	J	5	p1	143020	1.00882
Pt26_t2	KK138	8	lib1	TAS-102	NA	single	30	nM	I	5	p1	161630	1.1425
Pt26_t2	KK138	8	lib1	TAS-102	NA	single	100	nM	H	5	p1	152370	1.07598
Pt26_t2	KK138	8	lib1	TAS-102	NA	single	300	nM	G	5	p1	154670	1.0925
Pt26_t2	KK138	8	lib1	TAS-102	NA	single	1000	nM	F	5	p1	158200	1.11786
Pt26_t2	KK138	8	lib1	TAS-102	NA	single	3000	nM	E	5	p1	129780	0.91371
Pt26_t2	KK138	8	lib1	TAS-102	NA	single	10000	nM	D	5	p1	57990	0.398025
Pt26_t2	KK138	9	lib1	Afatinib	FIMM003710-001	single	0.1	nM	E	6	p1	142360	1.00407
Pt26_t2	KK138	9	lib1	Afatinib	FIMM003710-001	single	0.3	nM	D	6	p1	160740	1.1361
Pt26_t2	KK138	9	lib1	Afatinib	FIMM003710-001	single	1	nM	C	6	p1	184550	1.30714
Pt26_t2	KK138	9	lib1	Afatinib	FIMM003710-001	single	3	nM	B	6	p1	146620	1.03468
Pt26_t2	KK138	9	lib1	Afatinib	FIMM003710-001	single	10	nM	P	5	p1	111720	0.783981
Pt26_t2	KK138	9	lib1	Afatinib	FIMM003710-001	single	30	nM	A	6	p1	103430	0.724432
Pt26_t2	KK138	9	lib1	Afatinib	FIMM003710-001	single	100	nM	O	5	p1	61670	0.42446
Pt26_t2	KK138	9	lib1	Afatinib	FIMM003710-001	single	300	nM	N	5	p1	35280	0.234894
Pt26_t2	KK138	9	lib1	Afatinib	FIMM003710-001	single	1000	nM	M	5	p1	28539	0.186472
Pt26_t2	KK138	nc	lib1	DMSO	NA	control_negative	0.1	percent	A	2	p1	119570	0.840369
Pt26_t2	KK138	nc	lib1	DMSO	NA	control_negative	0.1	percent	A	12	p1	146960	1.03712
Pt26_t2	KK138	nc	lib1	DMSO	NA	control_negative	0.1	percent	C	5	p1	154850	1.09379
Pt26_t2	KK138	nc	lib1	DMSO	NA	control_negative	0.1	percent	C	20	p1	137290	0.967656
Pt26_t2	KK138	nc	lib1	DMSO	NA	control_negative	0.1	percent	F	9	p1	153710	1.0856
Pt26_t2	KK138	nc	lib1	DMSO	NA	control_negative	0.1	percent	F	15	p1	142200	1.00293
Pt26_t2	KK138	nc	lib1	DMSO	NA	control_negative	0.1	percent	I	7	p1	165590	1.17094
Pt26_t2	KK138	nc	lib1	DMSO	NA	control_negative	0.1	percent	I	13	p1	106490	0.746412
Pt26_t2	KK138	nc	lib1	DMSO	NA	control_negative	0.1	percent	I	19	p1	135910	0.957743
Pt26_t2	KK138	nc	lib1	DMSO	NA	control_negative	0.1	percent	L	8	p1	141620	0.998759
Pt26_t2	KK138	nc	lib1	DMSO	NA	control_negative	0.1	percent	L	17	p1	132120	0.930519
Pt26_t2	KK138	nc	lib1	DMSO	NA	control_negative	0.1	percent	P	3	p1	142980	1.00853
Pt26_t2	KK138	nc	lib1	DMSO	NA	control_negative	0.1	percent	P	22	p1	152510	1.07698
Pt26_t2	KK138	pc	lib1	BzCl	NA	control_positive	100000	nM	A	16	p1	3979	0.0100517
Pt26_t2	KK138	pc	lib1	BzCl	NA	control_positive	100000	nM	A	22	p1	2320	-0.00186525
Pt26_t2	KK138	pc	lib1	BzCl	NA	control_positive	100000	nM	F	6	p1	2940	0.00258836
Pt26_t2	KK138	pc	lib1	BzCl	NA	control_positive	100000	nM	I	4	p1	2660	0.000577053
Pt26_t2	KK138	pc	lib1	BzCl	NA	control_positive	100000	nM	I	10	p1	3479	0.00646012
Pt26_t2	KK138	pc	lib1	BzCl	NA	control_positive	100000	nM	L	14	p1	2039	-0.00388374
Pt26_t2	KK138	pc	lib1	BzCl	NA	control_positive	100000	nM	O	12	p1	2640	0.000433388
Pt26_t2	KK138	pc	lib1	BzCl	NA	control_positive	100000	nM	O	21	p1	2220	-0.00258357
Pt26_t2	KK138	pc	lib1	BzCl	NA	control_positive	100000	nM	P	18	p1	940	-0.0117781
Pt26_t2	KK138	1	lib1	5-FU	FIMM000439-004	combo	1	nM	I	1	p2	156440	1.0944
Pt26_t2	KK138	1	lib1	5-FU	FIMM000439-004	combo	3	nM	H	1	p2	155540	1.088
Pt26_t2	KK138	1	lib1	5-FU	FIMM000439-004	combo	10	nM	G	1	p2	136670	0.953682
Pt26_t2	KK138	1	lib1	5-FU	FIMM000439-004	combo	30	nM	F	1	p2	162470	1.13732
Pt26_t2	KK138	1	lib1	5-FU	FIMM000439-004	combo	100	nM	D	1	p2	96520	0.667898
Pt26_t2	KK138	1	lib1	5-FU	FIMM000439-004	combo	1000	nM	B	1	p2	36580	0.24125
Pt26_t2	KK138	1	lib1	5-FU	FIMM000439-004	combo	3000	nM	C	1	p2	35300	0.232139
Pt26_t2	KK138	1	lib1	Gemcitabine	FIMM023798-003	combo	0.1	nM	I	1	p2	156440	1.0944
Pt26_t2	KK138	1	lib1	Gemcitabine	FIMM023798-003	combo	0.3	nM	H	1	p2	155540	1.088
Pt26_t2	KK138	1	lib1	Gemcitabine	FIMM023798-003	combo	1	nM	G	1	p2	136670	0.953682
Pt26_t2	KK138	1	lib1	Gemcitabine	FIMM023798-003	combo	3	nM	F	1	p2	162470	1.13732
Pt26_t2	KK138	1	lib1	Gemcitabine	FIMM023798-003	combo	10	nM	D	1	p2	96520	0.667898
Pt26_t2	KK138	1	lib1	Gemcitabine	FIMM023798-003	combo	100	nM	B	1	p2	36580	0.24125
Pt26_t2	KK138	1	lib1	Gemcitabine	FIMM023798-003	combo	300	nM	C	1	p2	35300	0.232139
Pt26_t2	KK138	10	lib1	Lapatinib	FIMM000274-003	single	0.1	nM	O	6	p2	170960	1.19776
Pt26_t2	KK138	10	lib1	Lapatinib	FIMM000274-003	single	0.3	nM	N	6	p2	155020	1.0843
Pt26_t2	KK138	10	lib1	Lapatinib	FIMM000274-003	single	1	nM	M	6	p2	131620	0.917737
Pt26_t2	KK138	10	lib1	Lapatinib	FIMM000274-003	single	3	nM	L	6	p2	153390	1.07269
Pt26_t2	KK138	10	lib1	Lapatinib	FIMM000274-003	single	10	nM	K	6	p2	114659	0.79701
Pt26_t2	KK138	10	lib1	Lapatinib	FIMM000274-003	single	30	nM	J	6	p2	86850	0.599068
Pt26_t2	KK138	10	lib1	Lapatinib	FIMM000274-003	single	100	nM	I	6	p2	56210	0.380975
Pt26_t2	KK138	10	lib1	Lapatinib	FIMM000274-003	single	300	nM	H	6	p2	40080	0.266163
Pt26_t2	KK138	10	lib1	Lapatinib	FIMM000274-003	single	1000	nM	G	6	p2	31480	0.204949
Pt26_t2	KK138	11	lib1	Binimetinib	FIMM100407-001	single	0.1	nM	H	7	p2	163630	1.14558
Pt26_t2	KK138	11	lib1	Binimetinib	FIMM100407-001	single	0.3	nM	G	7	p2	125790	0.876239
Pt26_t2	KK138	11	lib1	Binimetinib	FIMM100407-001	single	1	nM	F	7	p2	162710	1.13903
Pt26_t2	KK138	11	lib1	Binimetinib	FIMM100407-001	single	3	nM	E	7	p2	140370	0.980019
Pt26_t2	KK138	11	lib1	Binimetinib	FIMM100407-001	single	10	nM	D	7	p2	130840	0.912185
Pt26_t2	KK138	11	lib1	Binimetinib	FIMM100407-001	single	30	nM	C	7	p2	115700	0.80442
Pt26_t2	KK138	11	lib1	Binimetinib	FIMM100407-001	single	100	nM	B	7	p2	92380	0.63843
Pt26_t2	KK138	11	lib1	Binimetinib	FIMM100407-001	single	300	nM	A	7	p2	72540	0.49721
Pt26_t2	KK138	11	lib1	Binimetinib	FIMM100407-001	single	1000	nM	P	6	p2	38160	0.252496
Pt26_t2	KK138	12	lib1	Sirolimus	FIMM023795-004	single	0.01	nM	B	8	p2	165410	1.15825
Pt26_t2	KK138	12	lib1	Sirolimus	FIMM023795-004	single	0.03	nM	A	8	p2	148650	1.03896
Pt26_t2	KK138	12	lib1	Sirolimus	FIMM023795-004	single	0.1	nM	P	7	p2	152110	1.06358
Pt26_t2	KK138	12	lib1	Sirolimus	FIMM023795-004	single	0.3	nM	O	7	p2	170900	1.19733
Pt26_t2	KK138	12	lib1	Sirolimus	FIMM023795-004	single	1	nM	N	7	p2	141540	0.988347
Pt26_t2	KK138	12	lib1	Sirolimus	FIMM023795-004	single	3	nM	M	7	p2	108430	0.752672
Pt26_t2	KK138	12	lib1	Sirolimus	FIMM023795-004	single	10	nM	L	7	p2	121350	0.844636
Pt26_t2	KK138	12	lib1	Sirolimus	FIMM023795-004	single	30	nM	K	7	p2	98880	0.684696
Pt26_t2	KK138	13	lib1	Alisertib	FIMM003761-002	single	1	nM	K	8	p2	167760	1.17498
Pt26_t2	KK138	13	lib1	Alisertib	FIMM003761-002	single	3	nM	J	8	p2	152250	1.06458
Pt26_t2	KK138	13	lib1	Alisertib	FIMM003761-002	single	10	nM	I	8	p2	171140	1.19904
Pt26_t2	KK138	13	lib1	Alisertib	FIMM003761-002	single	30	nM	H	8	p2	150310	1.05077
Pt26_t2	KK138	13	lib1	Alisertib	FIMM003761-002	single	100	nM	G	8	p2	92400	0.638572
Pt26_t2	KK138	13	lib1	Alisertib	FIMM003761-002	single	300	nM	F	8	p2	95720	0.662204
Pt26_t2	KK138	13	lib1	Alisertib	FIMM003761-002	single	1000	nM	E	8	p2	84770	0.584262
Pt26_t2	KK138	13	lib1	Alisertib	FIMM003761-002	single	3000	nM	D	8	p2	72120	0.494221
Pt26_t2	KK138	13	lib1	Alisertib	FIMM003761-002	single	10000	nM	C	8	p2	85350	0.588391
Pt26_t2	KK138	14	lib1	Navitoclax	FIMM003707-003	single	1	nM	E	9	p2	156700	1.09625
Pt26_t2	KK138	14	lib1	Navitoclax	FIMM003707-003	single	3	nM	D	9	p2	157740	1.10366
Pt26_t2	KK138	14	lib1	Navitoclax	FIMM003707-003	single	10	nM	C	9	p2	155800	1.08985
Pt26_t2	KK138	14	lib1	Navitoclax	FIMM003707-003	single	30	nM	B	9	p2	171840	1.20402
Pt26_t2	KK138	14	lib1	Navitoclax	FIMM003707-003	single	100	nM	A	9	p2	150710	1.05362
Pt26_t2	KK138	14	lib1	Navitoclax	FIMM003707-003	single	300	nM	P	8	p2	97560	0.675301
Pt26_t2	KK138	14	lib1	Navitoclax	FIMM003707-003	single	1000	nM	O	8	p2	115880	0.805701
Pt26_t2	KK138	14	lib1	Navitoclax	FIMM003707-003	single	3000	nM	N	8	p2	58029	0.393922
Pt26_t2	KK138	14	lib1	Navitoclax	FIMM003707-003	single	10000	nM	M	8	p2	29780	0.192848
Pt26_t2	KK138	15	lib1	Atorvastatin	FIMM109447-001	single	1	nM	O	9	p2	158360	1.10807
Pt26_t2	KK138	15	lib1	Atorvastatin	FIMM109447-001	single	3	nM	N	9	p2	132960	0.927275
Pt26_t2	KK138	15	lib1	Atorvastatin	FIMM109447-001	single	10	nM	M	9	p2	138090	0.96379
Pt26_t2	KK138	15	lib1	Atorvastatin	FIMM109447-001	single	30	nM	L	9	p2	146040	1.02038
Pt26_t2	KK138	15	lib1	Atorvastatin	FIMM109447-001	single	100	nM	K	9	p2	143080	0.999308
Pt26_t2	KK138	15	lib1	Atorvastatin	FIMM109447-001	single	300	nM	J	9	p2	95260	0.658929
Pt26_t2	KK138	15	lib1	Atorvastatin	FIMM109447-001	single	1000	nM	I	9	p2	109959	0.763556
Pt26_t2	KK138	15	lib1	Atorvastatin	FIMM109447-001	single	3000	nM	H	9	p2	78050	0.53643
Pt26_t2	KK138	15	lib1	Atorvastatin	FIMM109447-001	single	10000	nM	G	9	p2	51770	0.349371
Pt26_t2	KK138	16	lib1	Luminespib	FIMM003764-001	single	0.1	nM	H	10	p2	165770	1.16081
Pt26_t2	KK138	16	lib1	Luminespib	FIMM003764-001	single	0.3	nM	G	10	p2	154950	1.0838
Pt26_t2	KK138	16	lib1	Luminespib	FIMM003764-001	single	1	nM	F	10	p2	164950	1.15498
Pt26_t2	KK138	16	lib1	Luminespib	FIMM003764-001	single	3	nM	E	10	p2	162990	1.14103
Pt26_t2	KK138	16	lib1	Luminespib	FIMM003764-001	single	10	nM	D	10	p2	57650	0.391225
Pt26_t2	KK138	16	lib1	Luminespib	FIMM003764-001	single	30	nM	C	10	p2	34080	0.223455
Pt26_t2	KK138	16	lib1	Luminespib	FIMM003764-001	single	100	nM	B	10	p2	26500	0.169501
Pt26_t2	KK138	16	lib1	Luminespib	FIMM003764-001	single	300	nM	A	10	p2	22140	0.138467
Pt26_t2	KK138	16	lib1	Luminespib	FIMM003764-001	single	1000	nM	P	9	p2	18060	0.109426
Pt26_t2	KK138	17	lib1	Palbociclib	FIMM003705-003	single	1	nM	B	11	p2	153590	1.07412
Pt26_t2	KK138	17	lib1	Palbociclib	FIMM003705-003	single	3	nM	A	11	p2	164170	1.14943
Pt26_t2	KK138	17	lib1	Palbociclib	FIMM003705-003	single	10	nM	P	10	p2	146000	1.02009
Pt26_t2	KK138	17	lib1	Palbociclib	FIMM003705-003	single	30	nM	O	10	p2	145300	1.01511
Pt26_t2	KK138	17	lib1	Palbociclib	FIMM003705-003	single	100	nM	N	10	p2	110100	0.764559
Pt26_t2	KK138	17	lib1	Palbociclib	FIMM003705-003	single	300	nM	M	10	p2	75360	0.517283
Pt26_t2	KK138	17	lib1	Palbociclib	FIMM003705-003	single	1000	nM	L	10	p2	84410	0.5817
Pt26_t2	KK138	17	lib1	Palbociclib	FIMM003705-003	single	3000	nM	K	10	p2	87090	0.600776
Pt26_t2	KK138	17	lib1	Palbociclib	FIMM003705-003	single	10000	nM	J	10	p2	160660	1.12444
Pt26_t2	KK138	18	lib1	Methotrexate	FIMM000649-004	single	0.5	nM	K	11	p2	157540	1.10223
Pt26_t2	KK138	18	lib1	Methotrexate	FIMM000649-004	single	1.5	nM	J	11	p2	140050	0.977741
Pt26_t2	KK138	18	lib1	Methotrexate	FIMM000649-004	single	5	nM	I	11	p2	153110	1.0707
Pt26_t2	KK138	18	lib1	Methotrexate	FIMM000649-004	single	15	nM	H	11	p2	158520	1.10921
Pt26_t2	KK138	18	lib1	Methotrexate	FIMM000649-004	single	50	nM	G	11	p2	88190	0.608606
Pt26_t2	KK138	18	lib1	Methotrexate	FIMM000649-004	single	150	nM	F	11	p2	67420	0.460767
Pt26_t2	KK138	18	lib1	Methotrexate	FIMM000649-004	single	500	nM	E	11	p2	69800	0.477707
Pt26_t2	KK138	18	lib1	Methotrexate	FIMM000649-004	single	1500	nM	D	11	p2	62229	0.423817
Pt26_t2	KK138	18	lib1	Methotrexate	FIMM000649-004	single	5000	nM	C	11	p2	69400	0.47486
Pt26_t2	KK138	19	lib1	Panobinostat	FIMM003783-001	single	0.1	nM	E	12	p2	155680	1.08899
Pt26_t2	KK138	19	lib1	Panobinostat	FIMM003783-001	single	0.3	nM	D	12	p2	153490	1.07341
Pt26_t2	KK138	19	lib1	Panobinostat	FIMM003783-001	single	1	nM	C	12	p2	133900	0.933966
Pt26_t2	KK138	19	lib1	Panobinostat	FIMM003783-001	single	3	nM	B	12	p2	136130	0.949839
Pt26_t2	KK138	19	lib1	Panobinostat	FIMM003783-001	single	10	nM	P	11	p2	152790	1.06842
Pt26_t2	KK138	19	lib1	Panobinostat	FIMM003783-001	single	30	nM	O	11	p2	94680	0.654801
Pt26_t2	KK138	19	lib1	Panobinostat	FIMM003783-001	single	100	nM	N	11	p2	7020	0.0308443
Pt26_t2	KK138	19	lib1	Panobinostat	FIMM003783-001	single	300	nM	M	11	p2	1400	-0.00915839
Pt26_t2	KK138	19	lib1	Panobinostat	FIMM003783-001	single	1000	nM	L	11	p2	1760	-0.00659594
Pt26_t2	KK138	2	lib1	Erlotinib	FIMM000183-004	single	1	nM	C	2	p2	145100	1.01369
Pt26_t2	KK138	2	lib1	Erlotinib	FIMM000183-004	single	3	nM	B	2	p2	163390	1.14387
Pt26_t2	KK138	2	lib1	Erlotinib	FIMM000183-004	single	10	nM	P	1	p2	100750	0.698007
Pt26_t2	KK138	2	lib1	Erlotinib	FIMM000183-004	single	30	nM	O	1	p2	151230	1.05732
Pt26_t2	KK138	2	lib1	Erlotinib	FIMM000183-004	single	100	nM	N	1	p2	126170	0.878944
Pt26_t2	KK138	2	lib1	Erlotinib	FIMM000183-004	single	300	nM	M	1	p2	56610	0.383822
Pt26_t2	KK138	2	lib1	Erlotinib	FIMM000183-004	single	1000	nM	L	1	p2	34680	0.227726
Pt26_t2	KK138	2	lib1	Erlotinib	FIMM000183-004	single	3000	nM	K	1	p2	35760	0.235413
Pt26_t2	KK138	2	lib1	Erlotinib	FIMM000183-004	single	10000	nM	J	1	p2	25980	0.1658
Pt26_t2	KK138	20	lib1	Olaparib	FIMM003790-001	single	1	nM	N	12	p2	135850	0.947846
Pt26_t2	KK138	20	lib1	Olaparib	FIMM003790-001	single	3	nM	M	12	p2	132680	0.925282
Pt26_t2	KK138	20	lib1	Olaparib	FIMM003790-001	single	10	nM	L	12	p2	149610	1.04579
Pt26_t2	KK138	20	lib1	Olaparib	FIMM003790-001	single	30	nM	K	12	p2	168600	1.18096
Pt26_t2	KK138	20	lib1	Olaparib	FIMM003790-001	single	100	nM	J	12	p2	159980	1.1196
Pt26_t2	KK138	20	lib1	Olaparib	FIMM003790-001	single	300	nM	I	12	p2	165230	1.15697
Pt26_t2	KK138	20	lib1	Olaparib	FIMM003790-001	single	1000	nM	H	12	p2	148180	1.03561
Pt26_t2	KK138	20	lib1	Olaparib	FIMM003790-001	single	3000	nM	G	12	p2	129020	0.89923
Pt26_t2	KK138	21	lib1	Disulfiram+Cu	FIMM000416-004	single	5	nM	H	13	p2	120050	0.835383
Pt26_t2	KK138	21	lib1	Disulfiram+Cu	FIMM000416-004	single	15	nM	G	13	p2	146680	1.02493
Pt26_t2	KK138	21	lib1	Disulfiram+Cu	FIMM000416-004	single	50	nM	F	13	p2	135710	0.946849
Pt26_t2	KK138	21	lib1	Disulfiram+Cu	FIMM000416-004	single	150	nM	E	13	p2	158820	1.11134
Pt26_t2	KK138	21	lib1	Disulfiram+Cu	FIMM000416-004	single	1500	nM	D	13	p2	165190	1.15669
Pt26_t2	KK138	22	lib1	Linsitinib	FIMM003772-002	single	1	nM	B	14	p2	153890	1.07625
Pt26_t2	KK138	22	lib1	Linsitinib	FIMM003772-002	single	3	nM	A	14	p2	146620	1.02451
Pt26_t2	KK138	22	lib1	Linsitinib	FIMM003772-002	single	10	nM	P	13	p2	81450	0.560631
Pt26_t2	KK138	22	lib1	Linsitinib	FIMM003772-002	single	30	nM	O	13	p2	117120	0.814527
Pt26_t2	KK138	22	lib1	Linsitinib	FIMM003772-002	single	100	nM	N	13	p2	79670	0.547961
Pt26_t2	KK138	22	lib1	Linsitinib	FIMM003772-002	single	300	nM	M	13	p2	68600	0.469166
Pt26_t2	KK138	22	lib1	Linsitinib	FIMM003772-002	single	1000	nM	L	13	p2	57829	0.392499
Pt26_t2	KK138	22	lib1	Linsitinib	FIMM003772-002	single	3000	nM	K	13	p2	52110	0.351791
Pt26_t2	KK138	22	lib1	Linsitinib	FIMM003772-002	single	10000	nM	J	13	p2	42780	0.285381
Pt26_t2	KK138	23	lib1	Idasanutlin	FIMM136384-001	single	1	nM	K	14	p2	120009	0.835091
Pt26_t2	KK138	23	lib1	Idasanutlin	FIMM136384-001	single	3	nM	J	14	p2	133660	0.932257
Pt26_t2	KK138	23	lib1	Idasanutlin	FIMM136384-001	single	10	nM	I	14	p2	101450	0.702989
Pt26_t2	KK138	23	lib1	Idasanutlin	FIMM136384-001	single	30	nM	H	14	p2	130920	0.912754
Pt26_t2	KK138	23	lib1	Idasanutlin	FIMM136384-001	single	100	nM	G	14	p2	142140	0.992617
Pt26_t2	KK138	23	lib1	Idasanutlin	FIMM136384-001	single	300	nM	F	14	p2	129159	0.90022
Pt26_t2	KK138	23	lib1	Idasanutlin	FIMM136384-001	single	1000	nM	E	14	p2	153490	1.07341
Pt26_t2	KK138	23	lib1	Idasanutlin	FIMM136384-001	single	3000	nM	D	14	p2	124730	0.868694
Pt26_t2	KK138	23	lib1	Idasanutlin	FIMM136384-001	single	10000	nM	C	14	p2	115500	0.802996
Pt26_t2	KK138	24	lib1	Erastin	FIMM136615-001	single	1	nM	E	15	p2	156120	1.09213
Pt26_t2	KK138	24	lib1	Erastin	FIMM136615-001	single	3	nM	D	15	p2	154670	1.0818
Pt26_t2	KK138	24	lib1	Erastin	FIMM136615-001	single	10	nM	C	15	p2	143520	1.00244
Pt26_t2	KK138	24	lib1	Erastin	FIMM136615-001	single	30	nM	B	15	p2	157300	1.10053
Pt26_t2	KK138	24	lib1	Erastin	FIMM136615-001	single	100	nM	A	15	p2	163450	1.1443
Pt26_t2	KK138	24	lib1	Erastin	FIMM136615-001	single	300	nM	P	14	p2	105990	0.735305
Pt26_t2	KK138	24	lib1	Erastin	FIMM136615-001	single	1000	nM	O	14	p2	125709	0.875663
Pt26_t2	KK138	24	lib1	Erastin	FIMM136615-001	single	3000	nM	N	14	p2	125950	0.877378
Pt26_t2	KK138	25	lib1	2-methoxyestradiol	FIMM003765-001	single	1	nM	O	15	p2	100110	0.693451
Pt26_t2	KK138	25	lib1	2-methoxyestradiol	FIMM003765-001	single	3	nM	N	15	p2	105909	0.734728
Pt26_t2	KK138	25	lib1	2-methoxyestradiol	FIMM003765-001	single	10	nM	M	15	p2	85930	0.592519
Pt26_t2	KK138	25	lib1	2-methoxyestradiol	FIMM003765-001	single	30	nM	L	15	p2	41300	0.274847
Pt26_t2	KK138	25	lib1	2-methoxyestradiol	FIMM003765-001	single	100	nM	K	15	p2	36420	0.240111
Pt26_t2	KK138	25	lib1	2-methoxyestradiol	FIMM003765-001	single	300	nM	J	15	p2	29680	0.192136
Pt26_t2	KK138	25	lib1	2-methoxyestradiol	FIMM003765-001	single	1000	nM	I	15	p2	23860	0.15071
Pt26_t2	KK138	25	lib1	2-methoxyestradiol	FIMM003765-001	single	3000	nM	H	15	p2	29960	0.194129
Pt26_t2	KK138	25	lib1	2-methoxyestradiol	FIMM003765-001	single	10000	nM	G	15	p2	33340	0.218188
Pt26_t2	KK138	26	lib1	Vitamin C	NA	single	1	nM	I	16	p2	113740	0.790469
Pt26_t2	KK138	26	lib1	Vitamin C	NA	single	3	nM	H	16	p2	148710	1.03938
Pt26_t2	KK138	26	lib1	Vitamin C	NA	single	10	nM	G	16	p2	138210	0.964644
Pt26_t2	KK138	26	lib1	Vitamin C	NA	single	30	nM	F	16	p2	139910	0.976744
Pt26_t2	KK138	26	lib1	Vitamin C	NA	single	100	nM	E	16	p2	153590	1.07412
Pt26_t2	KK138	26	lib1	Vitamin C	NA	single	300	nM	D	16	p2	170980	1.1979
Pt26_t2	KK138	26	lib1	Vitamin C	NA	single	1000	nM	C	16	p2	155520	1.08786
Pt26_t2	KK138	26	lib1	Vitamin C	NA	single	3000	nM	B	16	p2	157200	1.09981
Pt26_t2	KK138	26	lib1	Vitamin C	NA	single	10000	nM	P	15	p2	103990	0.721069
Pt26_t2	KK138	27	lib1	Pevonedistat	FIMM115472-001	single	1	nM	B	17	p2	160260	1.12159
Pt26_t2	KK138	27	lib1	Pevonedistat	FIMM115472-001	single	3	nM	A	17	p2	157080	1.09896
Pt26_t2	KK138	27	lib1	Pevonedistat	FIMM115472-001	single	10	nM	P	16	p2	122090	0.849903
Pt26_t2	KK138	27	lib1	Pevonedistat	FIMM115472-001	single	30	nM	O	16	p2	97040	0.671599
Pt26_t2	KK138	27	lib1	Pevonedistat	FIMM115472-001	single	100	nM	N	16	p2	95680	0.661919
Pt26_t2	KK138	27	lib1	Pevonedistat	FIMM115472-001	single	300	nM	M	16	p2	80150	0.551378
Pt26_t2	KK138	27	lib1	Pevonedistat	FIMM115472-001	single	1000	nM	L	16	p2	58510	0.397346
Pt26_t2	KK138	27	lib1	Pevonedistat	FIMM115472-001	single	3000	nM	K	16	p2	36900	0.243528
Pt26_t2	KK138	27	lib1	Pevonedistat	FIMM115472-001	single	10000	nM	J	16	p2	19960	0.12295
Pt26_t2	KK138	28	lib1	Gedatolisib	FIMM133857-001	single	0.1	nM	K	17	p2	154230	1.07867
Pt26_t2	KK138	28	lib1	Gedatolisib	FIMM133857-001	single	0.3	nM	J	17	p2	134910	0.941155
Pt26_t2	KK138	28	lib1	Gedatolisib	FIMM133857-001	single	1	nM	I	17	p2	116000	0.806555
Pt26_t2	KK138	28	lib1	Gedatolisib	FIMM133857-001	single	3	nM	H	17	p2	144900	1.01226
Pt26_t2	KK138	28	lib1	Gedatolisib	FIMM133857-001	single	10	nM	G	17	p2	144760	1.01127
Pt26_t2	KK138	28	lib1	Gedatolisib	FIMM133857-001	single	30	nM	F	17	p2	140190	0.978737
Pt26_t2	KK138	28	lib1	Gedatolisib	FIMM133857-001	single	100	nM	E	17	p2	137830	0.961939
Pt26_t2	KK138	28	lib1	Gedatolisib	FIMM133857-001	single	300	nM	D	17	p2	77870	0.535149
Pt26_t2	KK138	28	lib1	Gedatolisib	FIMM133857-001	single	1000	nM	C	17	p2	34740	0.228153
Pt26_t2	KK138	29	lib1	Volasertib	FIMM100375-001	single	0.1	nM	E	18	p2	159220	1.11419
Pt26_t2	KK138	29	lib1	Volasertib	FIMM100375-001	single	0.3	nM	D	18	p2	156740	1.09654
Pt26_t2	KK138	29	lib1	Volasertib	FIMM100375-001	single	1	nM	C	18	p2	141900	0.990909
Pt26_t2	KK138	29	lib1	Volasertib	FIMM100375-001	single	3	nM	B	18	p2	166850	1.1685
Pt26_t2	KK138	29	lib1	Volasertib	FIMM100375-001	single	10	nM	P	17	p2	69060	0.47244
Pt26_t2	KK138	29	lib1	Volasertib	FIMM100375-001	single	30	nM	A	18	p2	40620	0.270006
Pt26_t2	KK138	29	lib1	Volasertib	FIMM100375-001	single	100	nM	O	17	p2	24820	0.157543
Pt26_t2	KK138	29	lib1	Volasertib	FIMM100375-001	single	300	nM	N	17	p2	28020	0.180321
Pt26_t2	KK138	29	lib1	Volasertib	FIMM100375-001	single	1000	nM	M	17	p2	19240	0.117825
Pt26_t2	KK138	3	lib1	Encorafenib	FIMM136367-001	single	0.1	nM	K	2	p2	166470	1.1658
Pt26_t2	KK138	3	lib1	Encorafenib	FIMM136367-001	single	0.3	nM	L	2	p2	154470	1.08038
Pt26_t2	KK138	3	lib1	Encorafenib	FIMM136367-001	single	1	nM	I	2	p2	160060	1.12017
Pt26_t2	KK138	3	lib1	Encorafenib	FIMM136367-001	single	3	nM	J	2	p2	161890	1.1332
Pt26_t2	KK138	3	lib1	Encorafenib	FIMM136367-001	single	10	nM	G	2	p2	143740	1.00401
Pt26_t2	KK138	3	lib1	Encorafenib	FIMM136367-001	single	30	nM	H	2	p2	159100	1.11334
Pt26_t2	KK138	3	lib1	Encorafenib	FIMM136367-001	single	100	nM	E	2	p2	146660	1.02479
Pt26_t2	KK138	3	lib1	Encorafenib	FIMM136367-001	single	300	nM	F	2	p2	148610	1.03867
Pt26_t2	KK138	3	lib1	Encorafenib	FIMM136367-001	single	1000	nM	D	2	p2	68980	0.471871
Pt26_t2	KK138	30	lib1	Tretinoin	FIMM000249-005	single	1	nM	N	18	p2	146520	1.02379
Pt26_t2	KK138	30	lib1	Tretinoin	FIMM000249-005	single	3	nM	M	18	p2	146520	1.02379
Pt26_t2	KK138	30	lib1	Tretinoin	FIMM000249-005	single	10	nM	L	18	p2	159500	1.11618
Pt26_t2	KK138	30	lib1	Tretinoin	FIMM000249-005	single	30	nM	K	18	p2	149470	1.04479
Pt26_t2	KK138	30	lib1	Tretinoin	FIMM000249-005	single	100	nM	J	18	p2	146440	1.02322
Pt26_t2	KK138	30	lib1	Tretinoin	FIMM000249-005	single	300	nM	I	18	p2	127280	0.886845
Pt26_t2	KK138	30	lib1	Tretinoin	FIMM000249-005	single	1000	nM	H	18	p2	144060	1.00628
Pt26_t2	KK138	30	lib1	Tretinoin	FIMM000249-005	single	3000	nM	G	18	p2	132020	0.920584
Pt26_t2	KK138	30	lib1	Tretinoin	FIMM000249-005	single	10000	nM	F	18	p2	108590	0.753811
Pt26_t2	KK138	31	lib1	Napabucasin	FIMM136507-001	single	2	nM	H	19	p2	157740	1.10366
Pt26_t2	KK138	31	lib1	Napabucasin	FIMM136507-001	single	6	nM	G	19	p2	137290	0.958096
Pt26_t2	KK138	31	lib1	Napabucasin	FIMM136507-001	single	20	nM	F	19	p2	138370	0.965783
Pt26_t2	KK138	31	lib1	Napabucasin	FIMM136507-001	single	60	nM	E	19	p2	171020	1.19818
Pt26_t2	KK138	31	lib1	Napabucasin	FIMM136507-001	single	200	nM	D	19	p2	178710	1.25292
Pt26_t2	KK138	31	lib1	Napabucasin	FIMM136507-001	single	600	nM	C	19	p2	122850	0.855313
Pt26_t2	KK138	31	lib1	Napabucasin	FIMM136507-001	single	2000	nM	B	19	p2	71460	0.489523
Pt26_t2	KK138	31	lib1	Napabucasin	FIMM136507-001	single	6000	nM	A	19	p2	1980	-0.00503
Pt26_t2	KK138	31	lib1	Napabucasin	FIMM136507-001	single	20000	nM	O	18	p2	960	-0.0122903
Pt26_t2	KK138	32	lib1	LCL161	FIMM133892-001	single	2.5	nM	B	20	p2	176870	1.23982
Pt26_t2	KK138	32	lib1	LCL161	FIMM133892-001	single	7.5	nM	A	20	p2	151450	1.05889
Pt26_t2	KK138	32	lib1	LCL161	FIMM133892-001	single	250	nM	N	19	p2	117200	0.815097
Pt26_t2	KK138	32	lib1	LCL161	FIMM133892-001	single	750	nM	M	19	p2	90360	0.624052
Pt26_t2	KK138	32	lib1	LCL161	FIMM133892-001	single	25000	nM	J	19	p2	87070	0.600634
Pt26_t2	KK138	33	lib1	Eltanexor	FIMM136587-001	single	1	nM	L	20	p2	141290	0.986567
Pt26_t2	KK138	33	lib1	Eltanexor	FIMM136587-001	single	3	nM	K	20	p2	149750	1.04678
Pt26_t2	KK138	33	lib1	Eltanexor	FIMM136587-001	single	10	nM	J	20	p2	157940	1.10508
Pt26_t2	KK138	33	lib1	Eltanexor	FIMM136587-001	single	30	nM	I	20	p2	148810	1.04009
Pt26_t2	KK138	33	lib1	Eltanexor	FIMM136587-001	single	100	nM	H	20	p2	119270	0.829831
Pt26_t2	KK138	33	lib1	Eltanexor	FIMM136587-001	single	300	nM	G	20	p2	89370	0.617005
Pt26_t2	KK138	33	lib1	Eltanexor	FIMM136587-001	single	1000	nM	F	20	p2	57490	0.390086
Pt26_t2	KK138	33	lib1	Eltanexor	FIMM136587-001	single	3000	nM	E	20	p2	52250	0.352788
Pt26_t2	KK138	33	lib1	Eltanexor	FIMM136587-001	single	10000	nM	D	20	p2	47030	0.315632
Pt26_t2	KK138	34	lib1	Bemcentinib	FIMM136394-002	single	1	nM	E	21	p2	155500	1.08771
Pt26_t2	KK138	34	lib1	Bemcentinib	FIMM136394-002	single	3	nM	D	21	p2	145480	1.01639
Pt26_t2	KK138	34	lib1	Bemcentinib	FIMM136394-002	single	10	nM	C	21	p2	136050	0.949269
Pt26_t2	KK138	34	lib1	Bemcentinib	FIMM136394-002	single	30	nM	B	21	p2	170640	1.19548
Pt26_t2	KK138	34	lib1	Bemcentinib	FIMM136394-002	single	100	nM	P	20	p2	151310	1.05789
Pt26_t2	KK138	34	lib1	Bemcentinib	FIMM136394-002	single	300	nM	A	21	p2	160600	1.12401
Pt26_t2	KK138	34	lib1	Bemcentinib	FIMM136394-002	single	1000	nM	O	20	p2	136150	0.949981
Pt26_t2	KK138	34	lib1	Bemcentinib	FIMM136394-002	single	3000	nM	N	20	p2	107570	0.746551
Pt26_t2	KK138	34	lib1	Bemcentinib	FIMM136394-002	single	10000	nM	M	20	p2	48110	0.32332
Pt26_t2	KK138	35	lib1	Regorafenib	FIMM100364-001	single	1	nM	N	21	p2	160160	1.12088
Pt26_t2	KK138	35	lib1	Regorafenib	FIMM100364-001	single	3	nM	M	21	p2	149410	1.04436
Pt26_t2	KK138	35	lib1	Regorafenib	FIMM100364-001	single	10	nM	L	21	p2	147500	1.03077
Pt26_t2	KK138	35	lib1	Regorafenib	FIMM100364-001	single	30	nM	K	21	p2	162190	1.13533
Pt26_t2	KK138	35	lib1	Regorafenib	FIMM100364-001	single	100	nM	J	21	p2	169400	1.18665
Pt26_t2	KK138	35	lib1	Regorafenib	FIMM100364-001	single	300	nM	I	21	p2	121830	0.848053
Pt26_t2	KK138	35	lib1	Regorafenib	FIMM100364-001	single	1000	nM	H	21	p2	147160	1.02835
Pt26_t2	KK138	35	lib1	Regorafenib	FIMM100364-001	single	3000	nM	G	21	p2	131340	0.915744
Pt26_t2	KK138	35	lib1	Regorafenib	FIMM100364-001	single	10000	nM	F	21	p2	80090	0.550951
Pt26_t2	KK138	36	lib1	AZD7762	FIMM003741-001	single	0.1	nM	I	22	p2	136970	0.955818
Pt26_t2	KK138	36	lib1	AZD7762	FIMM003741-001	single	0.3	nM	H	22	p2	167230	1.17121
Pt26_t2	KK138	36	lib1	AZD7762	FIMM003741-001	single	1	nM	G	22	p2	157900	1.1048
Pt26_t2	KK138	36	lib1	AZD7762	FIMM003741-001	single	3	nM	F	22	p2	135350	0.944287
Pt26_t2	KK138	36	lib1	AZD7762	FIMM003741-001	single	10	nM	E	22	p2	138390	0.965925
Pt26_t2	KK138	36	lib1	AZD7762	FIMM003741-001	single	30	nM	D	22	p2	161850	1.13291
Pt26_t2	KK138	36	lib1	AZD7762	FIMM003741-001	single	100	nM	C	22	p2	88430	0.610314
Pt26_t2	KK138	36	lib1	AZD7762	FIMM003741-001	single	300	nM	B	22	p2	35120	0.230858
Pt26_t2	KK138	36	lib1	AZD7762	FIMM003741-001	single	1000	nM	P	21	p2	16260	0.0966139
Pt26_t2	KK138	37	lib1	Crizotinib	FIMM003713-001	single	0.1	nM	C	23	p2	136230	0.950551
Pt26_t2	KK138	37	lib1	Crizotinib	FIMM003713-001	single	0.3	nM	B	23	p2	163850	1.14715
Pt26_t2	KK138	37	lib1	Crizotinib	FIMM003713-001	single	1	nM	O	22	p2	141150	0.985571
Pt26_t2	KK138	37	lib1	Crizotinib	FIMM003713-001	single	3	nM	A	23	p2	151570	1.05974
Pt26_t2	KK138	37	lib1	Crizotinib	FIMM003713-001	single	10	nM	N	22	p2	137330	0.95838
Pt26_t2	KK138	37	lib1	Crizotinib	FIMM003713-001	single	30	nM	M	22	p2	149710	1.0465
Pt26_t2	KK138	37	lib1	Crizotinib	FIMM003713-001	single	100	nM	L	22	p2	150670	1.05333
Pt26_t2	KK138	37	lib1	Crizotinib	FIMM003713-001	single	300	nM	K	22	p2	137490	0.959519
Pt26_t2	KK138	37	lib1	Crizotinib	FIMM003713-001	single	1000	nM	J	22	p2	152450	1.066
Pt26_t2	KK138	38	lib1	LGK974	FIMM136372-001	single	1	nM	L	23	p2	131600	0.917595
Pt26_t2	KK138	38	lib1	LGK974	FIMM136372-001	single	3	nM	K	23	p2	162610	1.13832
Pt26_t2	KK138	38	lib1	LGK974	FIMM136372-001	single	10	nM	J	23	p2	158660	1.11021
Pt26_t2	KK138	38	lib1	LGK974	FIMM136372-001	single	30	nM	I	23	p2	127740	0.890119
Pt26_t2	KK138	38	lib1	LGK974	FIMM136372-001	single	100	nM	H	23	p2	163430	1.14416
Pt26_t2	KK138	38	lib1	LGK974	FIMM136372-001	single	300	nM	G	23	p2	150090	1.0492
Pt26_t2	KK138	38	lib1	LGK974	FIMM136372-001	single	1000	nM	F	23	p2	131780	0.918876
Pt26_t2	KK138	38	lib1	LGK974	FIMM136372-001	single	3000	nM	E	23	p2	134020	0.93482
Pt26_t2	KK138	38	lib1	LGK974	FIMM136372-001	single	10000	nM	D	23	p2	136710	0.953967
Pt26_t2	KK138	4	lib1	5-FU	FIMM000439-004	single	1	nM	E	3	p2	150030	1.04878
Pt26_t2	KK138	4	lib1	5-FU	FIMM000439-004	single	3	nM	D	3	p2	138630	0.967634
Pt26_t2	KK138	4	lib1	5-FU	FIMM000439-004	single	10	nM	C	3	p2	153750	1.07526
Pt26_t2	KK138	4	lib1	5-FU	FIMM000439-004	single	30	nM	B	3	p2	159060	1.11305
Pt26_t2	KK138	4	lib1	5-FU	FIMM000439-004	single	100	nM	P	2	p2	114980	0.799295
Pt26_t2	KK138	4	lib1	5-FU	FIMM000439-004	single	300	nM	A	3	p2	112200	0.779507
Pt26_t2	KK138	4	lib1	5-FU	FIMM000439-004	single	1000	nM	O	2	p2	126700	0.882717
Pt26_t2	KK138	4	lib1	5-FU	FIMM000439-004	single	3000	nM	N	2	p2	97500	0.674874
Pt26_t2	KK138	4	lib1	5-FU	FIMM000439-004	single	10000	nM	M	2	p2	83790	0.577287
Pt26_t2	KK138	40	lib1	Trametinib	FIMM003751-001	single	0.025	nM	G	24	p2	139670	0.975036
Pt26_t2	KK138	40	lib1	Trametinib	FIMM003751-001	single	0.075	nM	F	24	p2	124270	0.86542
Pt26_t2	KK138	40	lib1	Trametinib	FIMM003751-001	single	0.25	nM	E	24	p2	132940	0.927133
Pt26_t2	KK138	40	lib1	Trametinib	FIMM003751-001	single	0.75	nM	D	24	p2	167600	1.17384
Pt26_t2	KK138	40	lib1	Trametinib	FIMM003751-001	single	2.5	nM	C	24	p2	72820	0.499203
Pt26_t2	KK138	40	lib1	Trametinib	FIMM003751-001	single	7.5	nM	B	24	p2	56490	0.382968
Pt26_t2	KK138	40	lib1	Trametinib	FIMM003751-001	single	25	nM	A	24	p2	47470	0.318764
Pt26_t2	KK138	40	lib1	Trametinib	FIMM003751-001	single	75	nM	P	23	p2	35860	0.236125
Pt26_t2	KK138	40	lib1	Trametinib	FIMM003751-001	single	250	nM	O	23	p2	29320	0.189574
Pt26_t2	KK138	41	lib1	Ipatasertib	FIMM115486-003	single	1	nM	P	24	p2	103950	0.720784
Pt26_t2	KK138	41	lib1	Ipatasertib	FIMM115486-003	single	3	nM	O	24	p2	91100	0.629319
Pt26_t2	KK138	41	lib1	Ipatasertib	FIMM115486-003	single	10	nM	N	24	p2	120990	0.842073
Pt26_t2	KK138	41	lib1	Ipatasertib	FIMM115486-003	single	30	nM	M	24	p2	137450	0.959234
Pt26_t2	KK138	41	lib1	Ipatasertib	FIMM115486-003	single	100	nM	L	24	p2	123770	0.861861
Pt26_t2	KK138	41	lib1	Ipatasertib	FIMM115486-003	single	300	nM	K	24	p2	139830	0.976175
Pt26_t2	KK138	41	lib1	Ipatasertib	FIMM115486-003	single	1000	nM	J	24	p2	97280	0.673308
Pt26_t2	KK138	41	lib1	Ipatasertib	FIMM115486-003	single	3000	nM	I	24	p2	52150	0.352076
Pt26_t2	KK138	41	lib1	Ipatasertib	FIMM115486-003	single	10000	nM	H	24	p2	34420	0.225875
Pt26_t2	KK138	42	lib1	Cetuximab	NA	single	35	nM	M	23	p2	56390	0.382256
Pt26_t2	KK138	42	lib1	Cetuximab	NA	single	350	nM	N	23	p2	43220	0.288513
Pt26_t2	KK138	5	lib1	SN-38	FIMM002374-001	single	1	nM	N	3	p2	142240	0.993329
Pt26_t2	KK138	5	lib1	SN-38	FIMM002374-001	single	3	nM	M	3	p2	63940	0.435996
Pt26_t2	KK138	5	lib1	SN-38	FIMM002374-001	single	100	nM	J	3	p2	23160	0.145728
Pt26_t2	KK138	5	lib1	SN-38	FIMM002374-001	single	300	nM	I	3	p2	21060	0.13078
Pt26_t2	KK138	5	lib1	SN-38	FIMM002374-001	single	10000	nM	F	3	p2	6620	0.0279971
Pt26_t2	KK138	6	lib1	Gemcitabine	FIMM023798-003	single	0.1	nM	H	4	p2	156280	1.09326
Pt26_t2	KK138	6	lib1	Gemcitabine	FIMM023798-003	single	0.3	nM	G	4	p2	157920	1.10494
Pt26_t2	KK138	6	lib1	Gemcitabine	FIMM023798-003	single	1	nM	F	4	p2	157300	1.10053
Pt26_t2	KK138	6	lib1	Gemcitabine	FIMM023798-003	single	3	nM	E	4	p2	161790	1.13248
Pt26_t2	KK138	6	lib1	Gemcitabine	FIMM023798-003	single	10	nM	D	4	p2	101030	0.7
Pt26_t2	KK138	6	lib1	Gemcitabine	FIMM023798-003	single	30	nM	C	4	p2	67520	0.461478
Pt26_t2	KK138	6	lib1	Gemcitabine	FIMM023798-003	single	100	nM	B	4	p2	35820	0.23584
Pt26_t2	KK138	6	lib1	Gemcitabine	FIMM023798-003	single	300	nM	A	4	p2	23840	0.150568
Pt26_t2	KK138	6	lib1	Gemcitabine	FIMM023798-003	single	1000	nM	O	3	p2	21280	0.132346
Pt26_t2	KK138	8	lib1	TAS-102	NA	single	1	nM	L	5	p2	172460	1.20843
Pt26_t2	KK138	8	lib1	TAS-102	NA	single	3	nM	K	5	p2	151370	1.05832
Pt26_t2	KK138	8	lib1	TAS-102	NA	single	10	nM	J	5	p2	145880	1.01924
Pt26_t2	KK138	8	lib1	TAS-102	NA	single	30	nM	I	5	p2	156480	1.09469
Pt26_t2	KK138	8	lib1	TAS-102	NA	single	100	nM	H	5	p2	164050	1.14857
Pt26_t2	KK138	8	lib1	TAS-102	NA	single	300	nM	G	5	p2	148710	1.03938
Pt26_t2	KK138	8	lib1	TAS-102	NA	single	1000	nM	F	5	p2	147680	1.03205
Pt26_t2	KK138	8	lib1	TAS-102	NA	single	3000	nM	E	5	p2	108870	0.755804
Pt26_t2	KK138	8	lib1	TAS-102	NA	single	10000	nM	D	5	p2	57110	0.387381
Pt26_t2	KK138	9	lib1	Afatinib	FIMM003710-001	single	0.1	nM	E	6	p2	132940	0.927133
Pt26_t2	KK138	9	lib1	Afatinib	FIMM003710-001	single	0.3	nM	D	6	p2	127740	0.890119
Pt26_t2	KK138	9	lib1	Afatinib	FIMM003710-001	single	1	nM	C	6	p2	154170	1.07825
Pt26_t2	KK138	9	lib1	Afatinib	FIMM003710-001	single	3	nM	B	6	p2	148570	1.03839
Pt26_t2	KK138	9	lib1	Afatinib	FIMM003710-001	single	10	nM	P	5	p2	124770	0.868979
Pt26_t2	KK138	9	lib1	Afatinib	FIMM003710-001	single	30	nM	A	6	p2	90160	0.622628
Pt26_t2	KK138	9	lib1	Afatinib	FIMM003710-001	single	100	nM	O	5	p2	49350	0.332146
Pt26_t2	KK138	9	lib1	Afatinib	FIMM003710-001	single	300	nM	N	5	p2	37860	0.250361
Pt26_t2	KK138	9	lib1	Afatinib	FIMM003710-001	single	1000	nM	M	5	p2	28920	0.186727
Pt26_t2	KK138	nc	lib1	DMSO	NA	control_negative	0.1	percent	A	2	p2	128659	0.896661
Pt26_t2	KK138	nc	lib1	DMSO	NA	control_negative	0.1	percent	A	12	p2	158060	1.10593
Pt26_t2	KK138	nc	lib1	DMSO	NA	control_negative	0.1	percent	C	5	p2	148280	1.03632
Pt26_t2	KK138	nc	lib1	DMSO	NA	control_negative	0.1	percent	C	20	p2	138790	0.968772
Pt26_t2	KK138	nc	lib1	DMSO	NA	control_negative	0.1	percent	F	9	p2	160320	1.12202
Pt26_t2	KK138	nc	lib1	DMSO	NA	control_negative	0.1	percent	F	15	p2	135370	0.944429
Pt26_t2	KK138	nc	lib1	DMSO	NA	control_negative	0.1	percent	I	7	p2	168660	1.18138
Pt26_t2	KK138	nc	lib1	DMSO	NA	control_negative	0.1	percent	I	13	p2	119990	0.834956
Pt26_t2	KK138	nc	lib1	DMSO	NA	control_negative	0.1	percent	I	19	p2	131660	0.918022
Pt26_t2	KK138	nc	lib1	DMSO	NA	control_negative	0.1	percent	L	8	p2	158440	1.10864
Pt26_t2	KK138	nc	lib1	DMSO	NA	control_negative	0.1	percent	L	17	p2	132780	0.925994
Pt26_t2	KK138	nc	lib1	DMSO	NA	control_negative	0.1	percent	P	3	p2	151290	1.05775
Pt26_t2	KK138	nc	lib1	DMSO	NA	control_negative	0.1	percent	P	22	p2	131300	0.915459
Pt26_t2	KK138	pc	lib1	BzCl	NA	control_positive	100000	nM	A	16	p2	4420	0.0123377
Pt26_t2	KK138	pc	lib1	BzCl	NA	control_positive	100000	nM	A	22	p2	2420	-0.00189811
Pt26_t2	KK138	pc	lib1	BzCl	NA	control_positive	100000	nM	F	6	p2	2480	-0.00147104
Pt26_t2	KK138	pc	lib1	BzCl	NA	control_positive	100000	nM	I	4	p2	2620	-0.000474528
Pt26_t2	KK138	pc	lib1	BzCl	NA	control_positive	100000	nM	I	10	p2	3420	0.00521981
Pt26_t2	KK138	pc	lib1	BzCl	NA	control_positive	100000	nM	L	14	p2	2320	-0.0026099
Pt26_t2	KK138	pc	lib1	BzCl	NA	control_positive	100000	nM	O	12	p2	3120	0.00308443
Pt26_t2	KK138	pc	lib1	BzCl	NA	control_positive	100000	nM	O	21	p2	2340	-0.00246754
Pt26_t2	KK138	pc	lib1	BzCl	NA	control_positive	100000	nM	P	18	p2	1040	-0.0117208
Pt12_t1	KK83	1	lib1	5-FU	FIMM000439-004	combo	1	nM	I	1	p1	213680	0.901466
Pt12_t1	KK83	1	lib1	5-FU	FIMM000439-004	combo	3	nM	H	1	p1	258830	1.09531
Pt12_t1	KK83	1	lib1	5-FU	FIMM000439-004	combo	10	nM	G	1	p1	209810	0.884851
Pt12_t1	KK83	1	lib1	5-FU	FIMM000439-004	combo	30	nM	F	1	p1	272290	1.15309
Pt12_t1	KK83	1	lib1	5-FU	FIMM000439-004	combo	100	nM	D	1	p1	207269	0.873942
Pt12_t1	KK83	1	lib1	5-FU	FIMM000439-004	combo	1000	nM	B	1	p1	164950	0.692257
Pt12_t1	KK83	1	lib1	5-FU	FIMM000439-004	combo	3000	nM	C	1	p1	138790	0.579945
Pt12_t1	KK83	1	lib1	Gemcitabine	FIMM023798-003	combo	0.1	nM	I	1	p1	213680	0.901466
Pt12_t1	KK83	1	lib1	Gemcitabine	FIMM023798-003	combo	0.3	nM	H	1	p1	258830	1.09531
Pt12_t1	KK83	1	lib1	Gemcitabine	FIMM023798-003	combo	1	nM	G	1	p1	209810	0.884851
Pt12_t1	KK83	1	lib1	Gemcitabine	FIMM023798-003	combo	3	nM	F	1	p1	272290	1.15309
Pt12_t1	KK83	1	lib1	Gemcitabine	FIMM023798-003	combo	10	nM	D	1	p1	207269	0.873942
Pt12_t1	KK83	1	lib1	Gemcitabine	FIMM023798-003	combo	100	nM	B	1	p1	164950	0.692257
Pt12_t1	KK83	1	lib1	Gemcitabine	FIMM023798-003	combo	300	nM	C	1	p1	138790	0.579945
Pt12_t1	KK83	10	lib1	Lapatinib	FIMM000274-003	single	0.1	nM	O	6	p1	242210	1.02395
Pt12_t1	KK83	10	lib1	Lapatinib	FIMM000274-003	single	0.3	nM	N	6	p1	241330	1.02017
Pt12_t1	KK83	10	lib1	Lapatinib	FIMM000274-003	single	1	nM	M	6	p1	245640	1.03868
Pt12_t1	KK83	10	lib1	Lapatinib	FIMM000274-003	single	3	nM	L	6	p1	268700	1.13768
Pt12_t1	KK83	10	lib1	Lapatinib	FIMM000274-003	single	10	nM	K	6	p1	261819	1.10814
Pt12_t1	KK83	10	lib1	Lapatinib	FIMM000274-003	single	30	nM	J	6	p1	230500	0.973679
Pt12_t1	KK83	10	lib1	Lapatinib	FIMM000274-003	single	100	nM	I	6	p1	135170	0.564404
Pt12_t1	KK83	10	lib1	Lapatinib	FIMM000274-003	single	300	nM	H	6	p1	141820	0.592954
Pt12_t1	KK83	10	lib1	Lapatinib	FIMM000274-003	single	1000	nM	G	6	p1	145040	0.606778
Pt12_t1	KK83	11	lib1	Binimetinib	FIMM100407-001	single	0.1	nM	H	7	p1	273230	1.15713
Pt12_t1	KK83	11	lib1	Binimetinib	FIMM100407-001	single	0.3	nM	G	7	p1	294770	1.24961
Pt12_t1	KK83	11	lib1	Binimetinib	FIMM100407-001	single	1	nM	F	7	p1	255140	1.07946
Pt12_t1	KK83	11	lib1	Binimetinib	FIMM100407-001	single	3	nM	E	7	p1	256700	1.08616
Pt12_t1	KK83	11	lib1	Binimetinib	FIMM100407-001	single	10	nM	D	7	p1	261500	1.10677
Pt12_t1	KK83	11	lib1	Binimetinib	FIMM100407-001	single	30	nM	C	7	p1	212240	0.895284
Pt12_t1	KK83	11	lib1	Binimetinib	FIMM100407-001	single	100	nM	B	7	p1	195390	0.822943
Pt12_t1	KK83	11	lib1	Binimetinib	FIMM100407-001	single	300	nM	A	7	p1	156580	0.656322
Pt12_t1	KK83	11	lib1	Binimetinib	FIMM100407-001	single	1000	nM	P	6	p1	193140	0.813283
Pt12_t1	KK83	12	lib1	Sirolimus	FIMM023795-004	single	0.01	nM	B	8	p1	250090	1.05778
Pt12_t1	KK83	12	lib1	Sirolimus	FIMM023795-004	single	0.03	nM	A	8	p1	264120	1.11802
Pt12_t1	KK83	12	lib1	Sirolimus	FIMM023795-004	single	0.1	nM	P	7	p1	263700	1.11621
Pt12_t1	KK83	12	lib1	Sirolimus	FIMM023795-004	single	0.3	nM	O	7	p1	242430	1.0249
Pt12_t1	KK83	12	lib1	Sirolimus	FIMM023795-004	single	1	nM	N	7	p1	228660	0.965779
Pt12_t1	KK83	12	lib1	Sirolimus	FIMM023795-004	single	3	nM	M	7	p1	173590	0.72935
Pt12_t1	KK83	12	lib1	Sirolimus	FIMM023795-004	single	10	nM	L	7	p1	107909	0.447366
Pt12_t1	KK83	12	lib1	Sirolimus	FIMM023795-004	single	30	nM	K	7	p1	83090	0.340812
Pt12_t1	KK83	13	lib1	Alisertib	FIMM003761-002	single	1	nM	K	8	p1	259250	1.09711
Pt12_t1	KK83	13	lib1	Alisertib	FIMM003761-002	single	3	nM	J	8	p1	249230	1.05409
Pt12_t1	KK83	13	lib1	Alisertib	FIMM003761-002	single	10	nM	I	8	p1	237119	1.0021
Pt12_t1	KK83	13	lib1	Alisertib	FIMM003761-002	single	30	nM	H	8	p1	282550	1.19714
Pt12_t1	KK83	13	lib1	Alisertib	FIMM003761-002	single	100	nM	G	8	p1	192600	0.810965
Pt12_t1	KK83	13	lib1	Alisertib	FIMM003761-002	single	300	nM	F	8	p1	211140	0.890561
Pt12_t1	KK83	13	lib1	Alisertib	FIMM003761-002	single	1000	nM	E	8	p1	214710	0.905888
Pt12_t1	KK83	13	lib1	Alisertib	FIMM003761-002	single	3000	nM	D	8	p1	168380	0.706982
Pt12_t1	KK83	13	lib1	Alisertib	FIMM003761-002	single	10000	nM	C	8	p1	197670	0.832731
Pt12_t1	KK83	14	lib1	Navitoclax	FIMM003707-003	single	1	nM	E	9	p1	236010	0.997334
Pt12_t1	KK83	14	lib1	Navitoclax	FIMM003707-003	single	3	nM	D	9	p1	276040	1.16919
Pt12_t1	KK83	14	lib1	Navitoclax	FIMM003707-003	single	10	nM	C	9	p1	268720	1.13777
Pt12_t1	KK83	14	lib1	Navitoclax	FIMM003707-003	single	30	nM	B	9	p1	224269	0.946927
Pt12_t1	KK83	14	lib1	Navitoclax	FIMM003707-003	single	100	nM	A	9	p1	216569	0.913869
Pt12_t1	KK83	14	lib1	Navitoclax	FIMM003707-003	single	300	nM	P	8	p1	227510	0.960842
Pt12_t1	KK83	14	lib1	Navitoclax	FIMM003707-003	single	1000	nM	O	8	p1	150230	0.62906
Pt12_t1	KK83	14	lib1	Navitoclax	FIMM003707-003	single	3000	nM	N	8	p1	103209	0.427188
Pt12_t1	KK83	14	lib1	Navitoclax	FIMM003707-003	single	10000	nM	M	8	p1	39080	0.151866
Pt12_t1	KK83	15	lib1	Atorvastatin	FIMM109447-001	single	1	nM	O	9	p1	239719	1.01326
Pt12_t1	KK83	15	lib1	Atorvastatin	FIMM109447-001	single	3	nM	N	9	p1	203260	0.856731
Pt12_t1	KK83	15	lib1	Atorvastatin	FIMM109447-001	single	10	nM	M	9	p1	183720	0.772841
Pt12_t1	KK83	15	lib1	Atorvastatin	FIMM109447-001	single	30	nM	L	9	p1	260350	1.10183
Pt12_t1	KK83	15	lib1	Atorvastatin	FIMM109447-001	single	100	nM	K	9	p1	202360	0.852867
Pt12_t1	KK83	15	lib1	Atorvastatin	FIMM109447-001	single	300	nM	J	9	p1	193960	0.816803
Pt12_t1	KK83	15	lib1	Atorvastatin	FIMM109447-001	single	1000	nM	I	9	p1	124350	0.517951
Pt12_t1	KK83	15	lib1	Atorvastatin	FIMM109447-001	single	3000	nM	H	9	p1	140590	0.587673
Pt12_t1	KK83	15	lib1	Atorvastatin	FIMM109447-001	single	10000	nM	G	9	p1	116340	0.483562
Pt12_t1	KK83	16	lib1	Luminespib	FIMM003764-001	single	0.1	nM	H	10	p1	263860	1.1169
Pt12_t1	KK83	16	lib1	Luminespib	FIMM003764-001	single	0.3	nM	G	10	p1	245600	1.03851
Pt12_t1	KK83	16	lib1	Luminespib	FIMM003764-001	single	1	nM	F	10	p1	284400	1.20508
Pt12_t1	KK83	16	lib1	Luminespib	FIMM003764-001	single	3	nM	E	10	p1	230119	0.972043
Pt12_t1	KK83	16	lib1	Luminespib	FIMM003764-001	single	10	nM	D	10	p1	223519	0.943707
Pt12_t1	KK83	16	lib1	Luminespib	FIMM003764-001	single	30	nM	C	10	p1	188870	0.794951
Pt12_t1	KK83	16	lib1	Luminespib	FIMM003764-001	single	100	nM	B	10	p1	86370	0.354894
Pt12_t1	KK83	16	lib1	Luminespib	FIMM003764-001	single	300	nM	A	10	p1	52490	0.209439
Pt12_t1	KK83	16	lib1	Luminespib	FIMM003764-001	single	1000	nM	P	9	p1	72380	0.294831
Pt12_t1	KK83	17	lib1	Palbociclib	FIMM003705-003	single	1	nM	B	11	p1	257369	1.08903
Pt12_t1	KK83	17	lib1	Palbociclib	FIMM003705-003	single	3	nM	A	11	p1	171480	0.720291
Pt12_t1	KK83	17	lib1	Palbociclib	FIMM003705-003	single	10	nM	P	10	p1	280750	1.18941
Pt12_t1	KK83	17	lib1	Palbociclib	FIMM003705-003	single	30	nM	O	10	p1	243110	1.02782
Pt12_t1	KK83	17	lib1	Palbociclib	FIMM003705-003	single	100	nM	N	10	p1	243410	1.0291
Pt12_t1	KK83	17	lib1	Palbociclib	FIMM003705-003	single	300	nM	M	10	p1	184360	0.775588
Pt12_t1	KK83	17	lib1	Palbociclib	FIMM003705-003	single	1000	nM	L	10	p1	213260	0.899663
Pt12_t1	KK83	17	lib1	Palbociclib	FIMM003705-003	single	3000	nM	K	10	p1	163070	0.684185
Pt12_t1	KK83	17	lib1	Palbociclib	FIMM003705-003	single	10000	nM	J	10	p1	74640	0.304534
Pt12_t1	KK83	18	lib1	Methotrexate	FIMM000649-004	single	0.5	nM	K	11	p1	299120	1.26828
Pt12_t1	KK83	18	lib1	Methotrexate	FIMM000649-004	single	1.5	nM	J	11	p1	257369	1.08903
Pt12_t1	KK83	18	lib1	Methotrexate	FIMM000649-004	single	5	nM	I	11	p1	220840	0.932206
Pt12_t1	KK83	18	lib1	Methotrexate	FIMM000649-004	single	15	nM	H	11	p1	233610	0.987031
Pt12_t1	KK83	18	lib1	Methotrexate	FIMM000649-004	single	50	nM	G	11	p1	186430	0.784475
Pt12_t1	KK83	18	lib1	Methotrexate	FIMM000649-004	single	150	nM	F	11	p1	146700	0.613905
Pt12_t1	KK83	18	lib1	Methotrexate	FIMM000649-004	single	500	nM	E	11	p1	145460	0.608581
Pt12_t1	KK83	18	lib1	Methotrexate	FIMM000649-004	single	1500	nM	D	11	p1	136450	0.569899
Pt12_t1	KK83	18	lib1	Methotrexate	FIMM000649-004	single	5000	nM	C	11	p1	139550	0.583208
Pt12_t1	KK83	19	lib1	Panobinostat	FIMM003783-001	single	0.1	nM	E	12	p1	236410	0.999052
Pt12_t1	KK83	19	lib1	Panobinostat	FIMM003783-001	single	0.3	nM	D	12	p1	267830	1.13395
Pt12_t1	KK83	19	lib1	Panobinostat	FIMM003783-001	single	1	nM	C	12	p1	246519	1.04245
Pt12_t1	KK83	19	lib1	Panobinostat	FIMM003783-001	single	3	nM	B	12	p1	268960	1.1388
Pt12_t1	KK83	19	lib1	Panobinostat	FIMM003783-001	single	10	nM	P	11	p1	246419	1.04202
Pt12_t1	KK83	19	lib1	Panobinostat	FIMM003783-001	single	30	nM	O	11	p1	154270	0.646405
Pt12_t1	KK83	19	lib1	Panobinostat	FIMM003783-001	single	100	nM	N	11	p1	45190	0.178098
Pt12_t1	KK83	19	lib1	Panobinostat	FIMM003783-001	single	300	nM	M	11	p1	11300	0.0326
Pt12_t1	KK83	19	lib1	Panobinostat	FIMM003783-001	single	1000	nM	L	11	p1	9000	0.0227256
Pt12_t1	KK83	2	lib1	Erlotinib	FIMM000183-004	single	1	nM	C	2	p1	255460	1.08084
Pt12_t1	KK83	2	lib1	Erlotinib	FIMM000183-004	single	3	nM	B	2	p1	241869	1.02249
Pt12_t1	KK83	2	lib1	Erlotinib	FIMM000183-004	single	10	nM	P	1	p1	211080	0.890304
Pt12_t1	KK83	2	lib1	Erlotinib	FIMM000183-004	single	30	nM	O	1	p1	188110	0.791688
Pt12_t1	KK83	2	lib1	Erlotinib	FIMM000183-004	single	100	nM	N	1	p1	185830	0.781899
Pt12_t1	KK83	2	lib1	Erlotinib	FIMM000183-004	single	300	nM	M	1	p1	124170	0.517178
Pt12_t1	KK83	2	lib1	Erlotinib	FIMM000183-004	single	1000	nM	L	1	p1	112559	0.467329
Pt12_t1	KK83	2	lib1	Erlotinib	FIMM000183-004	single	3000	nM	K	1	p1	97540	0.402849
Pt12_t1	KK83	2	lib1	Erlotinib	FIMM000183-004	single	10000	nM	J	1	p1	80710	0.330594
Pt12_t1	KK83	20	lib1	Olaparib	FIMM003790-001	single	1	nM	N	12	p1	210280	0.886869
Pt12_t1	KK83	20	lib1	Olaparib	FIMM003790-001	single	3	nM	M	12	p1	184690	0.777005
Pt12_t1	KK83	20	lib1	Olaparib	FIMM003790-001	single	10	nM	L	12	p1	324160	1.37578
Pt12_t1	KK83	20	lib1	Olaparib	FIMM003790-001	single	30	nM	K	12	p1	276240	1.17005
Pt12_t1	KK83	20	lib1	Olaparib	FIMM003790-001	single	100	nM	J	12	p1	283960	1.2032
Pt12_t1	KK83	20	lib1	Olaparib	FIMM003790-001	single	300	nM	I	12	p1	209330	0.882791
Pt12_t1	KK83	20	lib1	Olaparib	FIMM003790-001	single	1000	nM	H	12	p1	118450	0.492621
Pt12_t1	KK83	20	lib1	Olaparib	FIMM003790-001	single	3000	nM	G	12	p1	111940	0.464672
Pt12_t1	KK83	21	lib1	Disulfiram+Cu	FIMM000416-004	single	5	nM	H	13	p1	277700	1.17632
Pt12_t1	KK83	21	lib1	Disulfiram+Cu	FIMM000416-004	single	15	nM	G	13	p1	269100	1.1394
Pt12_t1	KK83	21	lib1	Disulfiram+Cu	FIMM000416-004	single	50	nM	F	13	p1	220840	0.932206
Pt12_t1	KK83	21	lib1	Disulfiram+Cu	FIMM000416-004	single	150	nM	E	13	p1	181920	0.765113
Pt12_t1	KK83	21	lib1	Disulfiram+Cu	FIMM000416-004	single	1500	nM	D	13	p1	186750	0.785849
Pt12_t1	KK83	22	lib1	Linsitinib	FIMM003772-002	single	1	nM	B	14	p1	235690	0.99596
Pt12_t1	KK83	22	lib1	Linsitinib	FIMM003772-002	single	3	nM	A	14	p1	198030	0.834277
Pt12_t1	KK83	22	lib1	Linsitinib	FIMM003772-002	single	10	nM	P	13	p1	247300	1.0458
Pt12_t1	KK83	22	lib1	Linsitinib	FIMM003772-002	single	30	nM	O	13	p1	232000	0.980118
Pt12_t1	KK83	22	lib1	Linsitinib	FIMM003772-002	single	100	nM	N	13	p1	207390	0.874462
Pt12_t1	KK83	22	lib1	Linsitinib	FIMM003772-002	single	300	nM	M	13	p1	187530	0.789198
Pt12_t1	KK83	22	lib1	Linsitinib	FIMM003772-002	single	1000	nM	L	13	p1	190180	0.800575
Pt12_t1	KK83	22	lib1	Linsitinib	FIMM003772-002	single	3000	nM	K	13	p1	175450	0.737336
Pt12_t1	KK83	22	lib1	Linsitinib	FIMM003772-002	single	10000	nM	J	13	p1	109959	0.456167
Pt12_t1	KK83	23	lib1	Idasanutlin	FIMM136384-001	single	1	nM	K	14	p1	284200	1.20423
Pt12_t1	KK83	23	lib1	Idasanutlin	FIMM136384-001	single	3	nM	J	14	p1	301050	1.27657
Pt12_t1	KK83	23	lib1	Idasanutlin	FIMM136384-001	single	10	nM	I	14	p1	197670	0.832731
Pt12_t1	KK83	23	lib1	Idasanutlin	FIMM136384-001	single	30	nM	H	14	p1	293530	1.24428
Pt12_t1	KK83	23	lib1	Idasanutlin	FIMM136384-001	single	100	nM	G	14	p1	254819	1.07809
Pt12_t1	KK83	23	lib1	Idasanutlin	FIMM136384-001	single	300	nM	F	14	p1	245719	1.03902
Pt12_t1	KK83	23	lib1	Idasanutlin	FIMM136384-001	single	1000	nM	E	14	p1	172100	0.722953
Pt12_t1	KK83	23	lib1	Idasanutlin	FIMM136384-001	single	3000	nM	D	14	p1	189470	0.797527
Pt12_t1	KK83	23	lib1	Idasanutlin	FIMM136384-001	single	10000	nM	C	14	p1	107370	0.445052
Pt12_t1	KK83	24	lib1	Erastin	FIMM136615-001	single	1	nM	E	15	p1	179320	0.75395
Pt12_t1	KK83	24	lib1	Erastin	FIMM136615-001	single	3	nM	D	15	p1	220160	0.929286
Pt12_t1	KK83	24	lib1	Erastin	FIMM136615-001	single	10	nM	C	15	p1	169700	0.712649
Pt12_t1	KK83	24	lib1	Erastin	FIMM136615-001	single	30	nM	B	15	p1	218930	0.924006
Pt12_t1	KK83	24	lib1	Erastin	FIMM136615-001	single	100	nM	A	15	p1	238519	1.00811
Pt12_t1	KK83	24	lib1	Erastin	FIMM136615-001	single	300	nM	P	14	p1	275270	1.16589
Pt12_t1	KK83	24	lib1	Erastin	FIMM136615-001	single	1000	nM	O	14	p1	268210	1.13558
Pt12_t1	KK83	24	lib1	Erastin	FIMM136615-001	single	3000	nM	N	14	p1	193340	0.814142
Pt12_t1	KK83	25	lib1	2-methoxyestradiol	FIMM003765-001	single	1	nM	O	15	p1	228600	0.965521
Pt12_t1	KK83	25	lib1	2-methoxyestradiol	FIMM003765-001	single	3	nM	N	15	p1	205019	0.864282
Pt12_t1	KK83	25	lib1	2-methoxyestradiol	FIMM003765-001	single	10	nM	M	15	p1	178710	0.751332
Pt12_t1	KK83	25	lib1	2-methoxyestradiol	FIMM003765-001	single	30	nM	L	15	p1	174730	0.734244
Pt12_t1	KK83	25	lib1	2-methoxyestradiol	FIMM003765-001	single	100	nM	K	15	p1	122970	0.512026
Pt12_t1	KK83	25	lib1	2-methoxyestradiol	FIMM003765-001	single	300	nM	J	15	p1	95060	0.392202
Pt12_t1	KK83	25	lib1	2-methoxyestradiol	FIMM003765-001	single	1000	nM	I	15	p1	97900	0.404395
Pt12_t1	KK83	25	lib1	2-methoxyestradiol	FIMM003765-001	single	3000	nM	H	15	p1	147480	0.617254
Pt12_t1	KK83	25	lib1	2-methoxyestradiol	FIMM003765-001	single	10000	nM	G	15	p1	89660	0.369018
Pt12_t1	KK83	26	lib1	Vitamin C	NA	single	1	nM	I	16	p1	204780	0.863256
Pt12_t1	KK83	26	lib1	Vitamin C	NA	single	3	nM	H	16	p1	263080	1.11355
Pt12_t1	KK83	26	lib1	Vitamin C	NA	single	10	nM	G	16	p1	300930	1.27605
Pt12_t1	KK83	26	lib1	Vitamin C	NA	single	30	nM	F	16	p1	199230	0.839429
Pt12_t1	KK83	26	lib1	Vitamin C	NA	single	100	nM	E	16	p1	255940	1.0829
Pt12_t1	KK83	26	lib1	Vitamin C	NA	single	300	nM	D	16	p1	228069	0.963242
Pt12_t1	KK83	26	lib1	Vitamin C	NA	single	1000	nM	C	16	p1	198510	0.836338
Pt12_t1	KK83	26	lib1	Vitamin C	NA	single	3000	nM	B	16	p1	211860	0.893653
Pt12_t1	KK83	26	lib1	Vitamin C	NA	single	10000	nM	P	15	p1	288690	1.2235
Pt12_t1	KK83	27	lib1	Pevonedistat	FIMM115472-001	single	1	nM	B	17	p1	192040	0.80856
Pt12_t1	KK83	27	lib1	Pevonedistat	FIMM115472-001	single	3	nM	A	17	p1	184320	0.775417
Pt12_t1	KK83	27	lib1	Pevonedistat	FIMM115472-001	single	10	nM	P	16	p1	291860	1.23711
Pt12_t1	KK83	27	lib1	Pevonedistat	FIMM115472-001	single	30	nM	O	16	p1	200700	0.84574
Pt12_t1	KK83	27	lib1	Pevonedistat	FIMM115472-001	single	100	nM	N	16	p1	208110	0.877553
Pt12_t1	KK83	27	lib1	Pevonedistat	FIMM115472-001	single	300	nM	M	16	p1	177590	0.746523
Pt12_t1	KK83	27	lib1	Pevonedistat	FIMM115472-001	single	1000	nM	L	16	p1	162530	0.681867
Pt12_t1	KK83	27	lib1	Pevonedistat	FIMM115472-001	single	3000	nM	K	16	p1	68500	0.278173
Pt12_t1	KK83	27	lib1	Pevonedistat	FIMM115472-001	single	10000	nM	J	16	p1	31720	0.120268
Pt12_t1	KK83	28	lib1	Gedatolisib	FIMM133857-001	single	0.1	nM	K	17	p1	209050	0.881588
Pt12_t1	KK83	28	lib1	Gedatolisib	FIMM133857-001	single	0.3	nM	J	17	p1	244490	1.03374
Pt12_t1	KK83	28	lib1	Gedatolisib	FIMM133857-001	single	1	nM	I	17	p1	204060	0.860165
Pt12_t1	KK83	28	lib1	Gedatolisib	FIMM133857-001	single	3	nM	H	17	p1	256140	1.08376
Pt12_t1	KK83	28	lib1	Gedatolisib	FIMM133857-001	single	10	nM	G	17	p1	229460	0.969214
Pt12_t1	KK83	28	lib1	Gedatolisib	FIMM133857-001	single	30	nM	F	17	p1	239940	1.01421
Pt12_t1	KK83	28	lib1	Gedatolisib	FIMM133857-001	single	100	nM	E	17	p1	200600	0.845311
Pt12_t1	KK83	28	lib1	Gedatolisib	FIMM133857-001	single	300	nM	D	17	p1	140870	0.588875
Pt12_t1	KK83	28	lib1	Gedatolisib	FIMM133857-001	single	1000	nM	C	17	p1	77930	0.318659
Pt12_t1	KK83	29	lib1	Volasertib	FIMM100375-001	single	0.1	nM	E	18	p1	185330	0.779753
Pt12_t1	KK83	29	lib1	Volasertib	FIMM100375-001	single	0.3	nM	D	18	p1	193400	0.814399
Pt12_t1	KK83	29	lib1	Volasertib	FIMM100375-001	single	1	nM	C	18	p1	179400	0.754294
Pt12_t1	KK83	29	lib1	Volasertib	FIMM100375-001	single	3	nM	B	18	p1	201940	0.851064
Pt12_t1	KK83	29	lib1	Volasertib	FIMM100375-001	single	10	nM	P	17	p1	163950	0.687963
Pt12_t1	KK83	29	lib1	Volasertib	FIMM100375-001	single	30	nM	A	18	p1	76300	0.311661
Pt12_t1	KK83	29	lib1	Volasertib	FIMM100375-001	single	100	nM	O	17	p1	83050	0.34064
Pt12_t1	KK83	29	lib1	Volasertib	FIMM100375-001	single	300	nM	N	17	p1	86830	0.356869
Pt12_t1	KK83	29	lib1	Volasertib	FIMM100375-001	single	1000	nM	M	17	p1	51510	0.205231
Pt12_t1	KK83	3	lib1	Encorafenib	FIMM136367-001	single	0.1	nM	K	2	p1	219680	0.927226
Pt12_t1	KK83	3	lib1	Encorafenib	FIMM136367-001	single	0.3	nM	L	2	p1	259310	1.09737
Pt12_t1	KK83	3	lib1	Encorafenib	FIMM136367-001	single	1	nM	I	2	p1	177470	0.746008
Pt12_t1	KK83	3	lib1	Encorafenib	FIMM136367-001	single	3	nM	J	2	p1	267230	1.13137
Pt12_t1	KK83	3	lib1	Encorafenib	FIMM136367-001	single	10	nM	G	2	p1	241169	1.01948
Pt12_t1	KK83	3	lib1	Encorafenib	FIMM136367-001	single	30	nM	H	2	p1	310940	1.31903
Pt12_t1	KK83	3	lib1	Encorafenib	FIMM136367-001	single	100	nM	E	2	p1	210819	0.889183
Pt12_t1	KK83	3	lib1	Encorafenib	FIMM136367-001	single	300	nM	F	2	p1	258690	1.09471
Pt12_t1	KK83	3	lib1	Encorafenib	FIMM136367-001	single	1000	nM	D	2	p1	195470	0.823286
Pt12_t1	KK83	30	lib1	Tretinoin	FIMM000249-005	single	1	nM	N	18	p1	238300	1.00717
Pt12_t1	KK83	30	lib1	Tretinoin	FIMM000249-005	single	3	nM	M	18	p1	186110	0.783102
Pt12_t1	KK83	30	lib1	Tretinoin	FIMM000249-005	single	10	nM	L	18	p1	266690	1.12905
Pt12_t1	KK83	30	lib1	Tretinoin	FIMM000249-005	single	30	nM	K	18	p1	264850	1.12115
Pt12_t1	KK83	30	lib1	Tretinoin	FIMM000249-005	single	100	nM	J	18	p1	230840	0.975138
Pt12_t1	KK83	30	lib1	Tretinoin	FIMM000249-005	single	300	nM	I	18	p1	212060	0.894511
Pt12_t1	KK83	30	lib1	Tretinoin	FIMM000249-005	single	1000	nM	H	18	p1	212340	0.895713
Pt12_t1	KK83	30	lib1	Tretinoin	FIMM000249-005	single	3000	nM	G	18	p1	192380	0.81002
Pt12_t1	KK83	30	lib1	Tretinoin	FIMM000249-005	single	10000	nM	F	18	p1	163790	0.687276
Pt12_t1	KK83	31	lib1	Napabucasin	FIMM136507-001	single	2	nM	H	19	p1	233369	0.985996
Pt12_t1	KK83	31	lib1	Napabucasin	FIMM136507-001	single	6	nM	G	19	p1	272180	1.15262
Pt12_t1	KK83	31	lib1	Napabucasin	FIMM136507-001	single	20	nM	F	19	p1	255640	1.08161
Pt12_t1	KK83	31	lib1	Napabucasin	FIMM136507-001	single	60	nM	E	19	p1	208210	0.877982
Pt12_t1	KK83	31	lib1	Napabucasin	FIMM136507-001	single	200	nM	D	19	p1	196670	0.828438
Pt12_t1	KK83	31	lib1	Napabucasin	FIMM136507-001	single	600	nM	C	19	p1	145540	0.608925
Pt12_t1	KK83	31	lib1	Napabucasin	FIMM136507-001	single	2000	nM	B	19	p1	3940	0.00100176
Pt12_t1	KK83	31	lib1	Napabucasin	FIMM136507-001	single	6000	nM	A	19	p1	1360	-0.0100748
Pt12_t1	KK83	31	lib1	Napabucasin	FIMM136507-001	single	20000	nM	O	18	p1	2400	-0.00560984
Pt12_t1	KK83	32	lib1	LCL161	FIMM133892-001	single	2.5	nM	B	20	p1	199450	0.840373
Pt12_t1	KK83	32	lib1	LCL161	FIMM133892-001	single	7.5	nM	A	20	p1	201060	0.847286
Pt12_t1	KK83	32	lib1	LCL161	FIMM133892-001	single	250	nM	N	19	p1	184160	0.77473
Pt12_t1	KK83	32	lib1	LCL161	FIMM133892-001	single	750	nM	M	19	p1	193140	0.813283
Pt12_t1	KK83	32	lib1	LCL161	FIMM133892-001	single	25000	nM	J	19	p1	126700	0.52804
Pt12_t1	KK83	33	lib1	Eltanexor	FIMM136587-001	single	1	nM	L	20	p1	251069	1.06199
Pt12_t1	KK83	33	lib1	Eltanexor	FIMM136587-001	single	3	nM	K	20	p1	242090	1.02344
Pt12_t1	KK83	33	lib1	Eltanexor	FIMM136587-001	single	10	nM	J	20	p1	242910	1.02696
Pt12_t1	KK83	33	lib1	Eltanexor	FIMM136587-001	single	30	nM	I	20	p1	265010	1.12184
Pt12_t1	KK83	33	lib1	Eltanexor	FIMM136587-001	single	100	nM	H	20	p1	190940	0.803838
Pt12_t1	KK83	33	lib1	Eltanexor	FIMM136587-001	single	300	nM	G	20	p1	162050	0.679806
Pt12_t1	KK83	33	lib1	Eltanexor	FIMM136587-001	single	1000	nM	F	20	p1	105109	0.435345
Pt12_t1	KK83	33	lib1	Eltanexor	FIMM136587-001	single	3000	nM	E	20	p1	94760	0.390914
Pt12_t1	KK83	33	lib1	Eltanexor	FIMM136587-001	single	10000	nM	D	20	p1	62690	0.25323
Pt12_t1	KK83	34	lib1	Bemcentinib	FIMM136394-002	single	1	nM	E	21	p1	206390	0.870168
Pt12_t1	KK83	34	lib1	Bemcentinib	FIMM136394-002	single	3	nM	D	21	p1	200920	0.846684
Pt12_t1	KK83	34	lib1	Bemcentinib	FIMM136394-002	single	10	nM	C	21	p1	213219	0.899487
Pt12_t1	KK83	34	lib1	Bemcentinib	FIMM136394-002	single	30	nM	B	21	p1	214690	0.905802
Pt12_t1	KK83	34	lib1	Bemcentinib	FIMM136394-002	single	100	nM	P	20	p1	257950	1.09153
Pt12_t1	KK83	34	lib1	Bemcentinib	FIMM136394-002	single	300	nM	A	21	p1	202240	0.852352
Pt12_t1	KK83	34	lib1	Bemcentinib	FIMM136394-002	single	1000	nM	O	20	p1	228500	0.965092
Pt12_t1	KK83	34	lib1	Bemcentinib	FIMM136394-002	single	3000	nM	N	20	p1	131400	0.548218
Pt12_t1	KK83	34	lib1	Bemcentinib	FIMM136394-002	single	10000	nM	M	20	p1	80250	0.328619
Pt12_t1	KK83	35	lib1	Regorafenib	FIMM100364-001	single	1	nM	N	21	p1	187110	0.787395
Pt12_t1	KK83	35	lib1	Regorafenib	FIMM100364-001	single	3	nM	M	21	p1	201820	0.850548
Pt12_t1	KK83	35	lib1	Regorafenib	FIMM100364-001	single	10	nM	L	21	p1	259510	1.09823
Pt12_t1	KK83	35	lib1	Regorafenib	FIMM100364-001	single	30	nM	K	21	p1	251050	1.0619
Pt12_t1	KK83	35	lib1	Regorafenib	FIMM100364-001	single	100	nM	J	21	p1	255580	1.08135
Pt12_t1	KK83	35	lib1	Regorafenib	FIMM100364-001	single	300	nM	I	21	p1	233569	0.986854
Pt12_t1	KK83	35	lib1	Regorafenib	FIMM100364-001	single	1000	nM	H	21	p1	254340	1.07603
Pt12_t1	KK83	35	lib1	Regorafenib	FIMM100364-001	single	3000	nM	G	21	p1	192540	0.810707
Pt12_t1	KK83	35	lib1	Regorafenib	FIMM100364-001	single	10000	nM	F	21	p1	99460	0.411092
Pt12_t1	KK83	36	lib1	AZD7762	FIMM003741-001	single	0.1	nM	I	22	p1	215490	0.909237
Pt12_t1	KK83	36	lib1	AZD7762	FIMM003741-001	single	0.3	nM	H	22	p1	242810	1.02653
Pt12_t1	KK83	36	lib1	AZD7762	FIMM003741-001	single	1	nM	G	22	p1	271840	1.15116
Pt12_t1	KK83	36	lib1	AZD7762	FIMM003741-001	single	3	nM	F	22	p1	201700	0.850033
Pt12_t1	KK83	36	lib1	AZD7762	FIMM003741-001	single	10	nM	E	22	p1	215169	0.907859
Pt12_t1	KK83	36	lib1	AZD7762	FIMM003741-001	single	30	nM	D	22	p1	245519	1.03816
Pt12_t1	KK83	36	lib1	AZD7762	FIMM003741-001	single	100	nM	C	22	p1	183860	0.773442
Pt12_t1	KK83	36	lib1	AZD7762	FIMM003741-001	single	300	nM	B	22	p1	132780	0.554143
Pt12_t1	KK83	36	lib1	AZD7762	FIMM003741-001	single	1000	nM	P	21	p1	48710	0.19321
Pt12_t1	KK83	37	lib1	Crizotinib	FIMM003713-001	single	0.1	nM	C	23	p1	186210	0.783531
Pt12_t1	KK83	37	lib1	Crizotinib	FIMM003713-001	single	0.3	nM	B	23	p1	195330	0.822685
Pt12_t1	KK83	37	lib1	Crizotinib	FIMM003713-001	single	1	nM	O	22	p1	225450	0.951998
Pt12_t1	KK83	37	lib1	Crizotinib	FIMM003713-001	single	3	nM	A	23	p1	206130	0.869052
Pt12_t1	KK83	37	lib1	Crizotinib	FIMM003713-001	single	10	nM	N	22	p1	206750	0.871714
Pt12_t1	KK83	37	lib1	Crizotinib	FIMM003713-001	single	30	nM	M	22	p1	190220	0.800747
Pt12_t1	KK83	37	lib1	Crizotinib	FIMM003713-001	single	100	nM	L	22	p1	230800	0.974966
Pt12_t1	KK83	37	lib1	Crizotinib	FIMM003713-001	single	300	nM	K	22	p1	240680	1.01738
Pt12_t1	KK83	37	lib1	Crizotinib	FIMM003713-001	single	1000	nM	J	22	p1	257410	1.08921
Pt12_t1	KK83	38	lib1	LGK974	FIMM136372-001	single	1	nM	L	23	p1	257469	1.08946
Pt12_t1	KK83	38	lib1	LGK974	FIMM136372-001	single	3	nM	K	23	p1	259590	1.09857
Pt12_t1	KK83	38	lib1	LGK974	FIMM136372-001	single	10	nM	J	23	p1	237400	1.0033
Pt12_t1	KK83	38	lib1	LGK974	FIMM136372-001	single	30	nM	I	23	p1	180680	0.759789
Pt12_t1	KK83	38	lib1	LGK974	FIMM136372-001	single	100	nM	H	23	p1	238300	1.00717
Pt12_t1	KK83	38	lib1	LGK974	FIMM136372-001	single	300	nM	G	23	p1	241410	1.02052
Pt12_t1	KK83	38	lib1	LGK974	FIMM136372-001	single	1000	nM	F	23	p1	206190	0.86931
Pt12_t1	KK83	38	lib1	LGK974	FIMM136372-001	single	3000	nM	E	23	p1	148000	0.619486
Pt12_t1	KK83	38	lib1	LGK974	FIMM136372-001	single	10000	nM	D	23	p1	91540	0.37709
Pt12_t1	KK83	4	lib1	5-FU	FIMM000439-004	single	1	nM	E	3	p1	237619	1.00424
Pt12_t1	KK83	4	lib1	5-FU	FIMM000439-004	single	3	nM	D	3	p1	213040	0.898719
Pt12_t1	KK83	4	lib1	5-FU	FIMM000439-004	single	10	nM	C	3	p1	211340	0.89142
Pt12_t1	KK83	4	lib1	5-FU	FIMM000439-004	single	30	nM	B	3	p1	223719	0.944566
Pt12_t1	KK83	4	lib1	5-FU	FIMM000439-004	single	100	nM	P	2	p1	264770	1.12081
Pt12_t1	KK83	4	lib1	5-FU	FIMM000439-004	single	300	nM	A	3	p1	189670	0.798385
Pt12_t1	KK83	4	lib1	5-FU	FIMM000439-004	single	1000	nM	O	2	p1	208430	0.878927
Pt12_t1	KK83	4	lib1	5-FU	FIMM000439-004	single	3000	nM	N	2	p1	145920	0.610556
Pt12_t1	KK83	4	lib1	5-FU	FIMM000439-004	single	10000	nM	M	2	p1	117600	0.488972
Pt12_t1	KK83	40	lib1	Trametinib	FIMM003751-001	single	0.025	nM	G	24	p1	249060	1.05336
Pt12_t1	KK83	40	lib1	Trametinib	FIMM003751-001	single	0.075	nM	F	24	p1	226150	0.955003
Pt12_t1	KK83	40	lib1	Trametinib	FIMM003751-001	single	0.25	nM	E	24	p1	211080	0.890304
Pt12_t1	KK83	40	lib1	Trametinib	FIMM003751-001	single	0.75	nM	D	24	p1	177870	0.747725
Pt12_t1	KK83	40	lib1	Trametinib	FIMM003751-001	single	2.5	nM	C	24	p1	167460	0.703033
Pt12_t1	KK83	40	lib1	Trametinib	FIMM003751-001	single	7.5	nM	B	24	p1	138630	0.579258
Pt12_t1	KK83	40	lib1	Trametinib	FIMM003751-001	single	25	nM	A	24	p1	99500	0.411264
Pt12_t1	KK83	40	lib1	Trametinib	FIMM003751-001	single	75	nM	P	23	p1	108290	0.449001
Pt12_t1	KK83	40	lib1	Trametinib	FIMM003751-001	single	250	nM	O	23	p1	99000	0.409117
Pt12_t1	KK83	41	lib1	Ipatasertib	FIMM115486-003	single	1	nM	P	24	p1	224169	0.946498
Pt12_t1	KK83	41	lib1	Ipatasertib	FIMM115486-003	single	3	nM	O	24	p1	218410	0.921773
Pt12_t1	KK83	41	lib1	Ipatasertib	FIMM115486-003	single	10	nM	N	24	p1	168340	0.706811
Pt12_t1	KK83	41	lib1	Ipatasertib	FIMM115486-003	single	30	nM	M	24	p1	199490	0.840545
Pt12_t1	KK83	41	lib1	Ipatasertib	FIMM115486-003	single	100	nM	L	24	p1	228740	0.966122
Pt12_t1	KK83	41	lib1	Ipatasertib	FIMM115486-003	single	300	nM	K	24	p1	228919	0.966891
Pt12_t1	KK83	41	lib1	Ipatasertib	FIMM115486-003	single	1000	nM	J	24	p1	199910	0.842348
Pt12_t1	KK83	41	lib1	Ipatasertib	FIMM115486-003	single	3000	nM	I	24	p1	186150	0.783273
Pt12_t1	KK83	41	lib1	Ipatasertib	FIMM115486-003	single	10000	nM	H	24	p1	182760	0.768719
Pt12_t1	KK83	42	lib1	Cetuximab	NA	single	35	nM	M	23	p1	221840	0.936499
Pt12_t1	KK83	42	lib1	Cetuximab	NA	single	350	nM	N	23	p1	165190	0.693287
Pt12_t1	KK83	5	lib1	SN-38	FIMM002374-001	single	1	nM	N	3	p1	243410	1.0291
Pt12_t1	KK83	5	lib1	SN-38	FIMM002374-001	single	3	nM	M	3	p1	244250	1.03271
Pt12_t1	KK83	5	lib1	SN-38	FIMM002374-001	single	100	nM	J	3	p1	134290	0.560626
Pt12_t1	KK83	5	lib1	SN-38	FIMM002374-001	single	300	nM	I	3	p1	115800	0.481244
Pt12_t1	KK83	5	lib1	SN-38	FIMM002374-001	single	10000	nM	F	3	p1	46510	0.183765
Pt12_t1	KK83	6	lib1	Gemcitabine	FIMM023798-003	single	0.1	nM	H	4	p1	262520	1.11115
Pt12_t1	KK83	6	lib1	Gemcitabine	FIMM023798-003	single	0.3	nM	G	4	p1	227850	0.962301
Pt12_t1	KK83	6	lib1	Gemcitabine	FIMM023798-003	single	1	nM	F	4	p1	261840	1.10823
Pt12_t1	KK83	6	lib1	Gemcitabine	FIMM023798-003	single	3	nM	E	4	p1	234930	0.992698
Pt12_t1	KK83	6	lib1	Gemcitabine	FIMM023798-003	single	10	nM	D	4	p1	205750	0.867421
Pt12_t1	KK83	6	lib1	Gemcitabine	FIMM023798-003	single	30	nM	C	4	p1	191980	0.808303
Pt12_t1	KK83	6	lib1	Gemcitabine	FIMM023798-003	single	100	nM	B	4	p1	146040	0.611071
Pt12_t1	KK83	6	lib1	Gemcitabine	FIMM023798-003	single	300	nM	A	4	p1	112280	0.466132
Pt12_t1	KK83	6	lib1	Gemcitabine	FIMM023798-003	single	1000	nM	O	3	p1	102670	0.424873
Pt12_t1	KK83	8	lib1	TAS-102	NA	single	1	nM	L	5	p1	288090	1.22093
Pt12_t1	KK83	8	lib1	TAS-102	NA	single	3	nM	K	5	p1	267270	1.13154
Pt12_t1	KK83	8	lib1	TAS-102	NA	single	10	nM	J	5	p1	262920	1.11287
Pt12_t1	KK83	8	lib1	TAS-102	NA	single	30	nM	I	5	p1	204000	0.859908
Pt12_t1	KK83	8	lib1	TAS-102	NA	single	100	nM	H	5	p1	279510	1.18409
Pt12_t1	KK83	8	lib1	TAS-102	NA	single	300	nM	G	5	p1	230719	0.974619
Pt12_t1	KK83	8	lib1	TAS-102	NA	single	1000	nM	F	5	p1	272530	1.15412
Pt12_t1	KK83	8	lib1	TAS-102	NA	single	3000	nM	E	5	p1	236010	0.997334
Pt12_t1	KK83	8	lib1	TAS-102	NA	single	10000	nM	D	5	p1	223769	0.944781
Pt12_t1	KK83	9	lib1	Afatinib	FIMM003710-001	single	0.1	nM	E	6	p1	260980	1.10454
Pt12_t1	KK83	9	lib1	Afatinib	FIMM003710-001	single	0.3	nM	D	6	p1	258650	1.09453
Pt12_t1	KK83	9	lib1	Afatinib	FIMM003710-001	single	1	nM	C	6	p1	240840	1.01807
Pt12_t1	KK83	9	lib1	Afatinib	FIMM003710-001	single	3	nM	B	6	p1	252750	1.0692
Pt12_t1	KK83	9	lib1	Afatinib	FIMM003710-001	single	10	nM	P	5	p1	240119	1.01498
Pt12_t1	KK83	9	lib1	Afatinib	FIMM003710-001	single	30	nM	A	6	p1	145700	0.609612
Pt12_t1	KK83	9	lib1	Afatinib	FIMM003710-001	single	100	nM	O	5	p1	102870	0.425732
Pt12_t1	KK83	9	lib1	Afatinib	FIMM003710-001	single	300	nM	N	5	p1	94540	0.389969
Pt12_t1	KK83	9	lib1	Afatinib	FIMM003710-001	single	1000	nM	M	5	p1	74320	0.30316
Pt12_t1	KK83	nc	lib1	DMSO	NA	control_negative	0.1	percent	A	2	p1	229180	0.968011
Pt12_t1	KK83	nc	lib1	DMSO	NA	control_negative	0.1	percent	A	12	p1	222040	0.937358
Pt12_t1	KK83	nc	lib1	DMSO	NA	control_negative	0.1	percent	C	5	p1	247080	1.04486
Pt12_t1	KK83	nc	lib1	DMSO	NA	control_negative	0.1	percent	C	20	p1	202640	0.854069
Pt12_t1	KK83	nc	lib1	DMSO	NA	control_negative	0.1	percent	F	9	p1	276640	1.17177
Pt12_t1	KK83	nc	lib1	DMSO	NA	control_negative	0.1	percent	F	15	p1	266590	1.12862
Pt12_t1	KK83	nc	lib1	DMSO	NA	control_negative	0.1	percent	I	7	p1	191620	0.806757
Pt12_t1	KK83	nc	lib1	DMSO	NA	control_negative	0.1	percent	I	13	p1	230160	0.972219
Pt12_t1	KK83	nc	lib1	DMSO	NA	control_negative	0.1	percent	I	19	p1	242290	1.0243
Pt12_t1	KK83	nc	lib1	DMSO	NA	control_negative	0.1	percent	L	8	p1	281990	1.19474
Pt12_t1	KK83	nc	lib1	DMSO	NA	control_negative	0.1	percent	L	17	p1	202580	0.853811
Pt12_t1	KK83	nc	lib1	DMSO	NA	control_negative	0.1	percent	P	3	p1	241290	1.02
Pt12_t1	KK83	nc	lib1	DMSO	NA	control_negative	0.1	percent	P	22	p1	242450	1.02498
Pt12_t1	KK83	pc	lib1	BzCl	NA	control_positive	100000	nM	A	16	p1	3500	-0.00088727
Pt12_t1	KK83	pc	lib1	BzCl	NA	control_positive	100000	nM	A	22	p1	3240	-0.00200351
Pt12_t1	KK83	pc	lib1	BzCl	NA	control_positive	100000	nM	F	6	p1	5060	0.00581019
Pt12_t1	KK83	pc	lib1	BzCl	NA	control_positive	100000	nM	I	4	p1	3720	5.72432e-05
Pt12_t1	KK83	pc	lib1	BzCl	NA	control_positive	100000	nM	I	10	p1	3640	-0.000286216
Pt12_t1	KK83	pc	lib1	BzCl	NA	control_positive	100000	nM	L	14	p1	4000	0.00125935
Pt12_t1	KK83	pc	lib1	BzCl	NA	control_positive	100000	nM	O	12	p1	4020	0.00134522
Pt12_t1	KK83	pc	lib1	BzCl	NA	control_positive	100000	nM	O	21	p1	4000	0.00125935
Pt12_t1	KK83	pc	lib1	BzCl	NA	control_positive	100000	nM	P	18	p1	2180	-0.00655435
Pt12_t1	KK83	1	lib1	5-FU	FIMM000439-004	combo	1	nM	I	1	p2	226569	1.01877
Pt12_t1	KK83	1	lib1	5-FU	FIMM000439-004	combo	3	nM	H	1	p2	247700	1.11528
Pt12_t1	KK83	1	lib1	5-FU	FIMM000439-004	combo	10	nM	G	1	p2	214710	0.964609
Pt12_t1	KK83	1	lib1	5-FU	FIMM000439-004	combo	30	nM	F	1	p2	216569	0.973099
Pt12_t1	KK83	1	lib1	5-FU	FIMM000439-004	combo	100	nM	D	1	p2	228150	1.02599
Pt12_t1	KK83	1	lib1	5-FU	FIMM000439-004	combo	1000	nM	B	1	p2	151090	0.674043
Pt12_t1	KK83	1	lib1	5-FU	FIMM000439-004	combo	3000	nM	C	1	p2	121350	0.538215
Pt12_t1	KK83	1	lib1	Gemcitabine	FIMM023798-003	combo	0.1	nM	I	1	p2	226569	1.01877
Pt12_t1	KK83	1	lib1	Gemcitabine	FIMM023798-003	combo	0.3	nM	H	1	p2	247700	1.11528
Pt12_t1	KK83	1	lib1	Gemcitabine	FIMM023798-003	combo	1	nM	G	1	p2	214710	0.964609
Pt12_t1	KK83	1	lib1	Gemcitabine	FIMM023798-003	combo	3	nM	F	1	p2	216569	0.973099
Pt12_t1	KK83	1	lib1	Gemcitabine	FIMM023798-003	combo	10	nM	D	1	p2	228150	1.02599
Pt12_t1	KK83	1	lib1	Gemcitabine	FIMM023798-003	combo	100	nM	B	1	p2	151090	0.674043
Pt12_t1	KK83	1	lib1	Gemcitabine	FIMM023798-003	combo	300	nM	C	1	p2	121350	0.538215
Pt12_t1	KK83	10	lib1	Lapatinib	FIMM000274-003	single	0.1	nM	O	6	p2	257040	1.15794
Pt12_t1	KK83	10	lib1	Lapatinib	FIMM000274-003	single	0.3	nM	N	6	p2	239000	1.07555
Pt12_t1	KK83	10	lib1	Lapatinib	FIMM000274-003	single	1	nM	M	6	p2	233110	1.04865
Pt12_t1	KK83	10	lib1	Lapatinib	FIMM000274-003	single	3	nM	L	6	p2	266410	1.20073
Pt12_t1	KK83	10	lib1	Lapatinib	FIMM000274-003	single	10	nM	K	6	p2	246480	1.10971
Pt12_t1	KK83	10	lib1	Lapatinib	FIMM000274-003	single	30	nM	J	6	p2	215830	0.969724
Pt12_t1	KK83	10	lib1	Lapatinib	FIMM000274-003	single	100	nM	I	6	p2	140270	0.624626
Pt12_t1	KK83	10	lib1	Lapatinib	FIMM000274-003	single	300	nM	H	6	p2	133720	0.594711
Pt12_t1	KK83	10	lib1	Lapatinib	FIMM000274-003	single	1000	nM	G	6	p2	85610	0.374983
Pt12_t1	KK83	11	lib1	Binimetinib	FIMM100407-001	single	0.1	nM	H	7	p2	274370	1.23709
Pt12_t1	KK83	11	lib1	Binimetinib	FIMM100407-001	single	0.3	nM	G	7	p2	229000	1.02987
Pt12_t1	KK83	11	lib1	Binimetinib	FIMM100407-001	single	1	nM	F	7	p2	234750	1.05614
Pt12_t1	KK83	11	lib1	Binimetinib	FIMM100407-001	single	3	nM	E	7	p2	240360	1.08176
Pt12_t1	KK83	11	lib1	Binimetinib	FIMM100407-001	single	10	nM	D	7	p2	279400	1.26006
Pt12_t1	KK83	11	lib1	Binimetinib	FIMM100407-001	single	30	nM	C	7	p2	187710	0.841294
Pt12_t1	KK83	11	lib1	Binimetinib	FIMM100407-001	single	100	nM	B	7	p2	223700	1.00567
Pt12_t1	KK83	11	lib1	Binimetinib	FIMM100407-001	single	300	nM	A	7	p2	158900	0.709713
Pt12_t1	KK83	11	lib1	Binimetinib	FIMM100407-001	single	1000	nM	P	6	p2	165450	0.739628
Pt12_t1	KK83	12	lib1	Sirolimus	FIMM023795-004	single	0.01	nM	B	8	p2	221080	0.993702
Pt12_t1	KK83	12	lib1	Sirolimus	FIMM023795-004	single	0.03	nM	A	8	p2	204180	0.916516
Pt12_t1	KK83	12	lib1	Sirolimus	FIMM023795-004	single	0.1	nM	P	7	p2	281790	1.27098
Pt12_t1	KK83	12	lib1	Sirolimus	FIMM023795-004	single	0.3	nM	O	7	p2	246700	1.11071
Pt12_t1	KK83	12	lib1	Sirolimus	FIMM023795-004	single	1	nM	N	7	p2	237460	1.06851
Pt12_t1	KK83	12	lib1	Sirolimus	FIMM023795-004	single	3	nM	M	7	p2	182440	0.817225
Pt12_t1	KK83	12	lib1	Sirolimus	FIMM023795-004	single	10	nM	L	7	p2	111540	0.493411
Pt12_t1	KK83	12	lib1	Sirolimus	FIMM023795-004	single	30	nM	K	7	p2	81470	0.356075
Pt12_t1	KK83	13	lib1	Alisertib	FIMM003761-002	single	1	nM	K	8	p2	242690	1.0924
Pt12_t1	KK83	13	lib1	Alisertib	FIMM003761-002	single	3	nM	J	8	p2	226950	1.02051
Pt12_t1	KK83	13	lib1	Alisertib	FIMM003761-002	single	10	nM	I	8	p2	218390	0.981416
Pt12_t1	KK83	13	lib1	Alisertib	FIMM003761-002	single	30	nM	H	8	p2	238940	1.07527
Pt12_t1	KK83	13	lib1	Alisertib	FIMM003761-002	single	100	nM	G	8	p2	165070	0.737893
Pt12_t1	KK83	13	lib1	Alisertib	FIMM003761-002	single	300	nM	F	8	p2	193520	0.86783
Pt12_t1	KK83	13	lib1	Alisertib	FIMM003761-002	single	1000	nM	E	8	p2	197670	0.886784
Pt12_t1	KK83	13	lib1	Alisertib	FIMM003761-002	single	3000	nM	D	8	p2	172660	0.772558
Pt12_t1	KK83	13	lib1	Alisertib	FIMM003761-002	single	10000	nM	C	8	p2	168080	0.75164
Pt12_t1	KK83	14	lib1	Navitoclax	FIMM003707-003	single	1	nM	E	9	p2	217830	0.978858
Pt12_t1	KK83	14	lib1	Navitoclax	FIMM003707-003	single	3	nM	D	9	p2	285980	1.29011
Pt12_t1	KK83	14	lib1	Navitoclax	FIMM003707-003	single	10	nM	C	9	p2	221800	0.99699
Pt12_t1	KK83	14	lib1	Navitoclax	FIMM003707-003	single	30	nM	B	9	p2	261400	1.17785
Pt12_t1	KK83	14	lib1	Navitoclax	FIMM003707-003	single	100	nM	A	9	p2	255140	1.14926
Pt12_t1	KK83	14	lib1	Navitoclax	FIMM003707-003	single	300	nM	P	8	p2	202040	0.906742
Pt12_t1	KK83	14	lib1	Navitoclax	FIMM003707-003	single	1000	nM	O	8	p2	167520	0.749082
Pt12_t1	KK83	14	lib1	Navitoclax	FIMM003707-003	single	3000	nM	N	8	p2	103409	0.456275
Pt12_t1	KK83	14	lib1	Navitoclax	FIMM003707-003	single	10000	nM	M	8	p2	35100	0.144294
Pt12_t1	KK83	15	lib1	Atorvastatin	FIMM109447-001	single	1	nM	O	9	p2	207669	0.932451
Pt12_t1	KK83	15	lib1	Atorvastatin	FIMM109447-001	single	3	nM	N	9	p2	228050	1.02554
Pt12_t1	KK83	15	lib1	Atorvastatin	FIMM109447-001	single	10	nM	M	9	p2	243550	1.09633
Pt12_t1	KK83	15	lib1	Atorvastatin	FIMM109447-001	single	30	nM	L	9	p2	250150	1.12647
Pt12_t1	KK83	15	lib1	Atorvastatin	FIMM109447-001	single	100	nM	K	9	p2	195130	0.875183
Pt12_t1	KK83	15	lib1	Atorvastatin	FIMM109447-001	single	300	nM	J	9	p2	201820	0.905738
Pt12_t1	KK83	15	lib1	Atorvastatin	FIMM109447-001	single	1000	nM	I	9	p2	117480	0.52054
Pt12_t1	KK83	15	lib1	Atorvastatin	FIMM109447-001	single	3000	nM	H	9	p2	122550	0.543695
Pt12_t1	KK83	15	lib1	Atorvastatin	FIMM109447-001	single	10000	nM	G	9	p2	91440	0.40161
Pt12_t1	KK83	16	lib1	Luminespib	FIMM003764-001	single	0.1	nM	H	10	p2	261940	1.18032
Pt12_t1	KK83	16	lib1	Luminespib	FIMM003764-001	single	0.3	nM	G	10	p2	245880	1.10697
Pt12_t1	KK83	16	lib1	Luminespib	FIMM003764-001	single	1	nM	F	10	p2	232400	1.0454
Pt12_t1	KK83	16	lib1	Luminespib	FIMM003764-001	single	3	nM	E	10	p2	226569	1.01877
Pt12_t1	KK83	16	lib1	Luminespib	FIMM003764-001	single	10	nM	D	10	p2	257150	1.15844
Pt12_t1	KK83	16	lib1	Luminespib	FIMM003764-001	single	30	nM	C	10	p2	134790	0.599598
Pt12_t1	KK83	16	lib1	Luminespib	FIMM003764-001	single	100	nM	B	10	p2	68980	0.29903
Pt12_t1	KK83	16	lib1	Luminespib	FIMM003764-001	single	300	nM	A	10	p2	58470	0.251029
Pt12_t1	KK83	16	lib1	Luminespib	FIMM003764-001	single	1000	nM	P	9	p2	66360	0.287064
Pt12_t1	KK83	17	lib1	Palbociclib	FIMM003705-003	single	1	nM	B	11	p2	219219	0.985202
Pt12_t1	KK83	17	lib1	Palbociclib	FIMM003705-003	single	3	nM	A	11	p2	224690	1.01019
Pt12_t1	KK83	17	lib1	Palbociclib	FIMM003705-003	single	10	nM	P	10	p2	297860	1.34437
Pt12_t1	KK83	17	lib1	Palbociclib	FIMM003705-003	single	30	nM	O	10	p2	222919	1.0021
Pt12_t1	KK83	17	lib1	Palbociclib	FIMM003705-003	single	100	nM	N	10	p2	239860	1.07947
Pt12_t1	KK83	17	lib1	Palbociclib	FIMM003705-003	single	300	nM	M	10	p2	194800	0.873676
Pt12_t1	KK83	17	lib1	Palbociclib	FIMM003705-003	single	1000	nM	L	10	p2	205000	0.920261
Pt12_t1	KK83	17	lib1	Palbociclib	FIMM003705-003	single	3000	nM	K	10	p2	164670	0.736066
Pt12_t1	KK83	17	lib1	Palbociclib	FIMM003705-003	single	10000	nM	J	10	p2	81990	0.35845
Pt12_t1	KK83	18	lib1	Methotrexate	FIMM000649-004	single	0.5	nM	K	11	p2	236769	1.06536
Pt12_t1	KK83	18	lib1	Methotrexate	FIMM000649-004	single	1.5	nM	J	11	p2	261440	1.17803
Pt12_t1	KK83	18	lib1	Methotrexate	FIMM000649-004	single	5	nM	I	11	p2	206869	0.928797
Pt12_t1	KK83	18	lib1	Methotrexate	FIMM000649-004	single	15	nM	H	11	p2	305840	1.38082
Pt12_t1	KK83	18	lib1	Methotrexate	FIMM000649-004	single	50	nM	G	11	p2	167010	0.746753
Pt12_t1	KK83	18	lib1	Methotrexate	FIMM000649-004	single	150	nM	F	11	p2	141150	0.628645
Pt12_t1	KK83	18	lib1	Methotrexate	FIMM000649-004	single	500	nM	E	11	p2	144800	0.645316
Pt12_t1	KK83	18	lib1	Methotrexate	FIMM000649-004	single	1500	nM	D	11	p2	160700	0.717934
Pt12_t1	KK83	18	lib1	Methotrexate	FIMM000649-004	single	5000	nM	C	11	p2	124850	0.5542
Pt12_t1	KK83	19	lib1	Panobinostat	FIMM003783-001	single	0.1	nM	E	12	p2	240760	1.08358
Pt12_t1	KK83	19	lib1	Panobinostat	FIMM003783-001	single	0.3	nM	D	12	p2	301670	1.36177
Pt12_t1	KK83	19	lib1	Panobinostat	FIMM003783-001	single	1	nM	C	12	p2	229860	1.0338
Pt12_t1	KK83	19	lib1	Panobinostat	FIMM003783-001	single	3	nM	B	12	p2	258390	1.1641
Pt12_t1	KK83	19	lib1	Panobinostat	FIMM003783-001	single	10	nM	P	11	p2	229000	1.02987
Pt12_t1	KK83	19	lib1	Panobinostat	FIMM003783-001	single	30	nM	O	11	p2	172280	0.770822
Pt12_t1	KK83	19	lib1	Panobinostat	FIMM003783-001	single	100	nM	N	11	p2	78690	0.343378
Pt12_t1	KK83	19	lib1	Panobinostat	FIMM003783-001	single	300	nM	M	11	p2	11240	0.0353202
Pt12_t1	KK83	19	lib1	Panobinostat	FIMM003783-001	single	1000	nM	L	11	p2	9180	0.0259118
Pt12_t1	KK83	2	lib1	Erlotinib	FIMM000183-004	single	1	nM	C	2	p2	234930	1.05696
Pt12_t1	KK83	2	lib1	Erlotinib	FIMM000183-004	single	3	nM	B	2	p2	240960	1.0845
Pt12_t1	KK83	2	lib1	Erlotinib	FIMM000183-004	single	10	nM	P	1	p2	237300	1.06778
Pt12_t1	KK83	2	lib1	Erlotinib	FIMM000183-004	single	30	nM	O	1	p2	222960	1.00229
Pt12_t1	KK83	2	lib1	Erlotinib	FIMM000183-004	single	100	nM	N	1	p2	198810	0.89199
Pt12_t1	KK83	2	lib1	Erlotinib	FIMM000183-004	single	300	nM	M	1	p2	129600	0.575894
Pt12_t1	KK83	2	lib1	Erlotinib	FIMM000183-004	single	1000	nM	L	1	p2	124930	0.554565
Pt12_t1	KK83	2	lib1	Erlotinib	FIMM000183-004	single	3000	nM	K	1	p2	86910	0.38092
Pt12_t1	KK83	2	lib1	Erlotinib	FIMM000183-004	single	10000	nM	J	1	p2	71000	0.308256
Pt12_t1	KK83	20	lib1	Olaparib	FIMM003790-001	single	1	nM	N	12	p2	250930	1.13003
Pt12_t1	KK83	20	lib1	Olaparib	FIMM003790-001	single	3	nM	M	12	p2	239980	1.08002
Pt12_t1	KK83	20	lib1	Olaparib	FIMM003790-001	single	10	nM	L	12	p2	278260	1.25485
Pt12_t1	KK83	20	lib1	Olaparib	FIMM003790-001	single	30	nM	K	12	p2	253740	1.14287
Pt12_t1	KK83	20	lib1	Olaparib	FIMM003790-001	single	100	nM	J	12	p2	231660	1.04202
Pt12_t1	KK83	20	lib1	Olaparib	FIMM003790-001	single	300	nM	I	12	p2	221600	0.996077
Pt12_t1	KK83	20	lib1	Olaparib	FIMM003790-001	single	1000	nM	H	12	p2	113700	0.503276
Pt12_t1	KK83	20	lib1	Olaparib	FIMM003790-001	single	3000	nM	G	12	p2	101370	0.446962
Pt12_t1	KK83	21	lib1	Disulfiram+Cu	FIMM000416-004	single	5	nM	H	13	p2	223460	1.00457
Pt12_t1	KK83	21	lib1	Disulfiram+Cu	FIMM000416-004	single	15	nM	G	13	p2	214480	0.963558
Pt12_t1	KK83	21	lib1	Disulfiram+Cu	FIMM000416-004	single	50	nM	F	13	p2	221460	0.995437
Pt12_t1	KK83	21	lib1	Disulfiram+Cu	FIMM000416-004	single	150	nM	E	13	p2	179880	0.805533
Pt12_t1	KK83	21	lib1	Disulfiram+Cu	FIMM000416-004	single	1500	nM	D	13	p2	197790	0.887332
Pt12_t1	KK83	22	lib1	Linsitinib	FIMM003772-002	single	1	nM	B	14	p2	234930	1.05696
Pt12_t1	KK83	22	lib1	Linsitinib	FIMM003772-002	single	3	nM	A	14	p2	248260	1.11784
Pt12_t1	KK83	22	lib1	Linsitinib	FIMM003772-002	single	10	nM	P	13	p2	249450	1.12327
Pt12_t1	KK83	22	lib1	Linsitinib	FIMM003772-002	single	30	nM	O	13	p2	218850	0.983517
Pt12_t1	KK83	22	lib1	Linsitinib	FIMM003772-002	single	100	nM	N	13	p2	213280	0.958078
Pt12_t1	KK83	22	lib1	Linsitinib	FIMM003772-002	single	300	nM	M	13	p2	192320	0.862349
Pt12_t1	KK83	22	lib1	Linsitinib	FIMM003772-002	single	1000	nM	L	13	p2	191420	0.858239
Pt12_t1	KK83	22	lib1	Linsitinib	FIMM003772-002	single	3000	nM	K	13	p2	143220	0.638099
Pt12_t1	KK83	22	lib1	Linsitinib	FIMM003772-002	single	10000	nM	J	13	p2	96320	0.423898
Pt12_t1	KK83	23	lib1	Idasanutlin	FIMM136384-001	single	1	nM	K	14	p2	232419	1.04549
Pt12_t1	KK83	23	lib1	Idasanutlin	FIMM136384-001	single	3	nM	J	14	p2	206610	0.927614
Pt12_t1	KK83	23	lib1	Idasanutlin	FIMM136384-001	single	10	nM	I	14	p2	196190	0.880024
Pt12_t1	KK83	23	lib1	Idasanutlin	FIMM136384-001	single	30	nM	H	14	p2	210240	0.944193
Pt12_t1	KK83	23	lib1	Idasanutlin	FIMM136384-001	single	100	nM	G	14	p2	221800	0.99699
Pt12_t1	KK83	23	lib1	Idasanutlin	FIMM136384-001	single	300	nM	F	14	p2	199950	0.897197
Pt12_t1	KK83	23	lib1	Idasanutlin	FIMM136384-001	single	1000	nM	E	14	p2	191880	0.86034
Pt12_t1	KK83	23	lib1	Idasanutlin	FIMM136384-001	single	3000	nM	D	14	p2	231240	1.0401
Pt12_t1	KK83	23	lib1	Idasanutlin	FIMM136384-001	single	10000	nM	C	14	p2	153070	0.683086
Pt12_t1	KK83	24	lib1	Erastin	FIMM136615-001	single	1	nM	E	15	p2	229900	1.03398
Pt12_t1	KK83	24	lib1	Erastin	FIMM136615-001	single	3	nM	D	15	p2	249330	1.12273
Pt12_t1	KK83	24	lib1	Erastin	FIMM136615-001	single	10	nM	C	15	p2	258669	1.16538
Pt12_t1	KK83	24	lib1	Erastin	FIMM136615-001	single	30	nM	B	15	p2	242830	1.09304
Pt12_t1	KK83	24	lib1	Erastin	FIMM136615-001	single	100	nM	A	15	p2	195890	0.878654
Pt12_t1	KK83	24	lib1	Erastin	FIMM136615-001	single	300	nM	P	14	p2	250550	1.1283
Pt12_t1	KK83	24	lib1	Erastin	FIMM136615-001	single	1000	nM	O	14	p2	198710	0.891534
Pt12_t1	KK83	24	lib1	Erastin	FIMM136615-001	single	3000	nM	N	14	p2	175330	0.784752
Pt12_t1	KK83	25	lib1	2-methoxyestradiol	FIMM003765-001	single	1	nM	O	15	p2	205000	0.920261
Pt12_t1	KK83	25	lib1	2-methoxyestradiol	FIMM003765-001	single	3	nM	N	15	p2	154230	0.688384
Pt12_t1	KK83	25	lib1	2-methoxyestradiol	FIMM003765-001	single	10	nM	M	15	p2	152190	0.679067
Pt12_t1	KK83	25	lib1	2-methoxyestradiol	FIMM003765-001	single	30	nM	L	15	p2	155480	0.694093
Pt12_t1	KK83	25	lib1	2-methoxyestradiol	FIMM003765-001	single	100	nM	K	15	p2	95980	0.422345
Pt12_t1	KK83	25	lib1	2-methoxyestradiol	FIMM003765-001	single	300	nM	J	15	p2	87190	0.382199
Pt12_t1	KK83	25	lib1	2-methoxyestradiol	FIMM003765-001	single	1000	nM	I	15	p2	92340	0.40572
Pt12_t1	KK83	25	lib1	2-methoxyestradiol	FIMM003765-001	single	3000	nM	H	15	p2	114940	0.508939
Pt12_t1	KK83	25	lib1	2-methoxyestradiol	FIMM003765-001	single	10000	nM	G	15	p2	84770	0.371147
Pt12_t1	KK83	26	lib1	Vitamin C	NA	single	1	nM	I	16	p2	183600	0.822523
Pt12_t1	KK83	26	lib1	Vitamin C	NA	single	3	nM	H	16	p2	238100	1.07144
Pt12_t1	KK83	26	lib1	Vitamin C	NA	single	10	nM	G	16	p2	197650	0.886692
Pt12_t1	KK83	26	lib1	Vitamin C	NA	single	30	nM	F	16	p2	211160	0.948395
Pt12_t1	KK83	26	lib1	Vitamin C	NA	single	100	nM	E	16	p2	227630	1.02362
Pt12_t1	KK83	26	lib1	Vitamin C	NA	single	300	nM	D	16	p2	259110	1.16739
Pt12_t1	KK83	26	lib1	Vitamin C	NA	single	1000	nM	C	16	p2	252950	1.13926
Pt12_t1	KK83	26	lib1	Vitamin C	NA	single	3000	nM	B	16	p2	205769	0.923773
Pt12_t1	KK83	26	lib1	Vitamin C	NA	single	10000	nM	P	15	p2	257730	1.16109
Pt12_t1	KK83	27	lib1	Pevonedistat	FIMM115472-001	single	1	nM	B	17	p2	267430	1.20539
Pt12_t1	KK83	27	lib1	Pevonedistat	FIMM115472-001	single	3	nM	A	17	p2	241969	1.08911
Pt12_t1	KK83	27	lib1	Pevonedistat	FIMM115472-001	single	10	nM	P	16	p2	255340	1.15017
Pt12_t1	KK83	27	lib1	Pevonedistat	FIMM115472-001	single	30	nM	O	16	p2	218090	0.980046
Pt12_t1	KK83	27	lib1	Pevonedistat	FIMM115472-001	single	100	nM	N	16	p2	186890	0.837549
[truncated: 184,015 more rows]
