# Supplementary material for: Ex vivo modeling of morphological, molecular and pharmacological tumor heterogeneity of metastatic colorectal cancer
Source: Research Square preprint supplement (doi:10.21203/rs.3.rs-6507406/v1), 2025-05-09
Supplement: Supplementary file 2 [file 265bb7b73e45a6fde1d41455.xlsx]

## Sheet: Sheet1
ensembl_gene_id	entrezgene_id	hgnc_symbol	Pt31_t1	Pt31_t2	Pt32_t1	Pt32_t2	Pt32_t3	Pt33_t2	Pt35_t2	Pt37_t1	Pt38_t1	Pt38_t2	Pt39_t1	Pt39_t2	Pt40_t2	Pt42_t2	Pt43_t1	Pt43_t3	Pt44_t1	Pt44_t2	Pt44_t4	Pt45_t1	Pt45_t2	Pt45_t3	Pt46_t1	Pt46_t2	Pt49_t1	Pt49_t2	Pt49_t3	Pt49_t4	Pt56_t1	Pt56_t4	Pt57_t2	Pt58_t1	Pt58_t2	Pt59_t1	Pt59_t2	Pt59_t3	Pt61_t2	Pt62_t1	Pt62_t2	Pt65_t1	Pt67_t1	Pt70_t1	Pt74_t1	Pt74_t2	Pt74_t3	Pt74_t4	Pt77_t1
ENSG00000121410	1	A1BG	3	2	0	2	2	1	0	1	3	2	1	0	4	0	0	3	26	6	10	1	6	4	2	7	2	5	1	6	1	13	1	1	1	2	9	2	0	1	0	6	8	2	2	1	2	1	2
ENSG00000148584	29974	A1CF	6733	4121	612	1632	932	1091	1583	2823	1972	2370	412	2790	1504	5294	1699	1822	342	593	980	1007	1349	910	44	431	3311	2116	1441	1567	1826	1418	757	822	1200	1253	1456	1119	2678	243	201	1726	4858	136	1030	870	1032	945	3425
ENSG00000175899	2	A2M	16	0	26	94	45	308	246	0	35	553	4	1	1	5313	0	11	0	4	0	15	67	107	0	1	1	0	0	7	0	0	37	2	0	11	0	23	1968	666	370	14	8	9	5	0	1	3	164
ENSG00000166535	144568	A2ML1	1	3	0	0	0	1	2	0	1	1	0	0	0	0	1	0	2	7	4	9	40	27	0	0	1	1	0	0	164	886	1	0	1	0	3	0	3	0	0	65	0	0	0	0	0	0	0
ENSG00000184389	127550	A3GALT2	4	3	1	5	3	4	2	2	1	3	4	4	4	0	1	2	1	1	0	0	0	0	10	3	1	1	0	0	0	1	2	0	6	0	0	2	0	2	1	3	3	1	1	0	1	2	0
ENSG00000128274	53947	A4GALT	3	36	0	0	0	2	10	3	253	48	24	6	6	17	5	26	0	1	0	5	36	15	732	314	6	2	5	2	12	25	29	9	15	8	27	9	23	64	33	211	44	13	0	0	1	0	2
ENSG00000118017	51146	A4GNT	0	0	0	0	0	0	0	1	0	0	0	0	0	1	0	0	0	0	0	0	0	0	0	0	0	0	0	0	1	0	0	0	0	0	0	0	1	0	0	0	0	0	0	0	0	0	0
ENSG00000183044	18	ABAT	675	928	470	140	725	2705	4049	633	7357	4811	1013	4614	4256	1715	1543	3710	116	664	1696	741	701	136	121	500	2801	1362	1427	1236	913	2396	344	1362	3708	6772	12789	4974	1071	526	2066	5675	1368	1681	129	208	300	750	2358
ENSG00000165029	19	ABCA1	1144	1485	92	434	322	1525	468	733	1056	925	297	3485	1181	802	3624	1619	15	36	33	97	368	270	136	331	1357	3991	423	598	867	4255	121	469	942	2595	8903	1375	584	491	1259	3174	2312	6667	132	104	95	138	4555
ENSG00000154263	10349	ABCA10	252	365	26	12	20	9	18	0	1	4	0	0	2	3	0	1	1	13	7	2	3	1	22	6	2	11	6	1	9	1	8	5	0	9	58	52	8	19	37	8	4	2	43	40	11	34	3
ENSG00000144452	26154	ABCA12	0	1	63	73	20	1	52	4	5	3	0	2	1	2	0	1	424	30	101	3	0	1	0	1	3	0	3	0	2	4	1	0	0	6	2	2	0	537	893	62	1	50	369	145	168	129	1
ENSG00000179869	154664	ABCA13	68	78	73	58	135	701	11	164	40	71	70	527	992	694	23	59	143	222	319	302	347	208	6	41	80	148	281	40	68	20	58	290	58	71	6	19	106	17	66	62	51	3	162	111	82	113	154
ENSG00000107331	20	ABCA2	1201	1349	2895	4020	3231	2776	1500	1456	5144	4130	4101	3031	4554	4767	4123	6905	7539	4412	5640	2659	3869	4068	3687	3966	11298	7394	5043	9484	1879	2555	649	3032	6219	1285	2962	1574	1837	2087	1683	2089	2574	4678	4077	2277	3569	3310	2344
ENSG00000167972	21	ABCA3	104	172	66	72	75	50	119	355	20	13	441	51	86	18	182	330	2583	1172	2158	375	612	941	140	132	2089	231	130	164	467	858	390	70	287	68	184	35	1169	186	284	18	49	20	3698	3416	3703	2478	45
ENSG00000198691	24	ABCA4	3	2	8	7	15	13	1	2	21	6	2	17	3	34	48	3	38	59	33	1	5	4	13	0	1	18	18	21	0	2	1	6	0	32	10	2	4	3	6	5	5	18	10	12	12	3	18
ENSG00000154265	23461	ABCA5	1350	1056	306	431	369	277	799	242	240	453	184	307	580	238	345	269	19	504	338	225	243	269	648	691	581	360	281	194	391	146	1299	483	712	991	3791	1176	322	277	984	1141	1619	435	632	280	421	440	225
ENSG00000154262	23460	ABCA6	13	10	0	1	0	1	2	1	0	0	0	0	0	6	0	0	0	4	0	1	7	1	6	2	1	2	1	0	3	0	1	3	2	2	22	44	0	2	1	8	2	1	3	1	0	1	0
ENSG00000064687	10347	ABCA7	1956	1588	2440	2126	3595	646	647	1056	2048	2226	2139	1825	1316	401	1667	3097	1589	2527	2720	673	1797	1038	1239	486	2310	1690	1324	1262	699	1552	971	1434	2212	3047	3854	2573	726	1943	2730	1576	1933	2131	1089	616	873	1401	641
ENSG00000141338	10351	ABCA8	0	0	0	0	0	0	0	0	0	0	0	4	2	2	0	0	0	0	5	0	0	0	0	0	0	0	1	0	0	0	0	0	0	1	0	0	0	0	0	0	0	0	0	0	3	3	4
ENSG00000154258	10350	ABCA9	4	4	0	0	3	0	3	3	2	1	1	2	2	7	0	0	4	8	24	6	5	2	4	0	9	1	2	3	0	2	0	1	4	2	10	26	0	2	3	4	4	2	6	0	2	2	3
ENSG00000085563	5243	ABCB1	18563	17740	3865	3612	3742	6908	27753	503	1991	3385	2452	2723	6067	9379	14448	3935	3733	5706	17203	763	203	213	2221	2855	9371	10972	14682	7209	5883	1428	13653	8991	8655	15936	13310	17311	7791	1454	5005	4845	15918	2316	14163	7292	9929	9461	13252
ENSG00000135776	23456	ABCB10	2342	2295	3210	1770	2608	1573	3561	3115	3892	4146	2540	2394	2306	3900	3215	2284	2645	2100	5298	2409	1771	1407	9302	7210	2544	2218	3824	2292	2165	1511	1821	3841	3279	1888	3037	1765	2180	3133	2708	2303	2419	1900	3973	3063	2969	2086	3271
ENSG00000073734	8647	ABCB11	53	7	59	36	60	2	3	7	0	0	0	3	0	2	0	4	25	49	12	0	2	2	3	4	3	1	3	0	0	0	0	0	5	2	24	1	0	16	10	2	3	3	3	10	1	5	23
ENSG00000005471	5244	ABCB4	111	150	10	12	9	338	644	32	32	31	56	39	107	30	598	105	23	127	99	17	18	11	48	35	282	369	182	998	77	81	22	43	71	231	111	276	443	152	216	28	80	220	1538	777	1456	1656	124
ENSG00000004846	340273	ABCB5	39	5	0	0	0	0	0	0	0	1	0	6	0	2	2	5	2	1	1	0	0	0	0	2	6	0	2	0	1	0	0	2	0	3	1	1	0	1	1	1	0	0	2	1	3	2	3
ENSG00000115657	10058	ABCB6	515	563	590	427	559	236	441	691	623	699	321	493	884	551	467	889	878	981	1192	455	895	1607	511	684	909	621	882	737	478	840	355	1126	1204	563	546	518	154	237	154	507	1005	344	605	350	558	468	353
ENSG00000131269	22	ABCB7	2032	1969	1435	1363	1390	2195	3039	1380	2449	2075	2767	2451	2429	3269	2404	3486	1435	1103	1746	1846	1607	1181	2759	2858	2084	1327	2155	2279	1444	1621	1536	3779	2241	2863	3095	2563	3158	2509	2206	1937	1632	1740	2563	1660	1951	2090	2428
ENSG00000197150	11194	ABCB8	3736	4206	4501	1882	3516	2087	3301	2375	2168	2627	2328	1609	1283	2154	2856	1435	2145	3124	4395	3415	2094	2790	6574	4214	1652	756	2935	1539	3127	3317	3334	2693	2908	3414	3658	3777	1105	4026	3318	3323	1661	1116	4230	2728	4455	2765	2009
ENSG00000150967	23457	ABCB9	277	282	370	264	202	669	222	609	537	499	447	276	702	543	374	375	783	1092	1068	531	607	554	886	540	917	459	837	705	519	561	396	549	648	569	390	603	641	1136	1418	574	555	842	715	433	554	369	685
ENSG00000103222	4363	ABCC1	2122	2861	2192	1397	2856	2967	1631	1681	3816	4402	1838	3034	2150	2963	1794	1372	2448	3930	2262	2399	3086	1973	3713	5873	2030	1972	2314	1923	2103	1648	2109	2737	2982	2555	3118	2239	2559	4383	5547	2530	1176	2373	1348	1778	829	1378	4875
ENSG00000124574	89845	ABCC10	2968	3110	2994	1471	2455	2948	3003	3239	3755	3724	3740	3519	2248	3142	2955	3171	3725	5651	6521	2158	2436	1908	3759	3420	991	815	3282	2368	2637	2085	2174	3930	4650	3686	5318	4005	4675	1972	2490	3579	2676	2192	2376	1731	2035	1333	2602
ENSG00000121270	85320	ABCC11	18	6	13	6	15	8	4	29	9	6	1	6	14	20	4	10	16	21	11	13	43	46	10	10	35	20	12	12	13	9	11	12	8	29	7	15	12	12	24	13	19	5	14	24	5	14	26
ENSG00000140798	94160	ABCC12	0	0	0	2	0	2	0	1	0	1	1	12	0	0	1	0	0	0	1	0	2	0	0	0	0	0	0	0	0	1	0	0	0	4	3	0	0	0	0	4	0	0	0	0	0	0	1
ENSG00000023839	1244	ABCC2	1015	1222	3417	417	215	943	155	75	1282	1331	128	603	693	10077	493	118	4642	13250	10027	186	891	562	80	76	158	114	865	117	130	226	61	547	523	5050	1365	1910	988	1246	1308	1878	4609	3596	1866	1377	1483	760	4752
ENSG00000108846	8714	ABCC3	3870	5484	10478	12917	16085	5190	1289	5217	6872	8177	5735	2496	7163	4011	2776	2479	16479	12554	5578	10567	15403	11609	4700	5068	11610	17001	11892	9008	2803	3735	17305	9608	13657	4338	2970	5787	2259	8030	11773	6098	12102	6949	12663	10072	10113	13366	3428
ENSG00000125257	10257	ABCC4	5	7	986	1119	493	4432	59	5373	2305	1903	5477	3065	2368	9323	4438	4863	804	1433	8116	6218	4059	4114	4068	2542	4606	1948	2375	5989	1483	4553	1	7429	5346	3038	629	1500	4090	2165	1614	5820	4693	3691	4098	1833	2657	1603	3727
ENSG00000114770	10057	ABCC5	385	598	1000	1050	1151	2073	1216	1770	866	865	1746	4020	2301	2630	2174	2122	5578	6434	5144	2480	2452	2048	1917	1805	1396	902	2027	1347	1119	1396	823	1763	2916	4017	4098	2353	1891	985	1196	3590	2617	1540	1389	1591	1666	1556	2435
ENSG00000091262	368	ABCC6	23	63	180	235	150	169	100	174	137	99	293	729	513	194	196	265	90	64	89	529	843	478	423	856	409	208	206	240	548	371	57	103	152	126	123	66	744	14	66	245	341	202	101	57	91	140	251
ENSG00000006071	6833	ABCC8	4	8	3	4	3	7	1	1	1	0	1	0	9	1	1	0	9	4	6	2	2	0	1	9	9	4	8	18	0	0	99	4	5	0	6	2	17	3	19	3	6	3	17	46	13	21	4
ENSG00000069431	10060	ABCC9	1	14	5	0	1	18	1	1	74	52	58	957	269	229	70	6253	11	35	228	3	6	0	0	6	515	520	2021	558	4	12	0	1	1	98	2294	97	1	2	1	97	12	5	28	28	10	8	567
ENSG00000101986	215	ABCD1	933	959	246	201	282	789	603	462	558	582	851	856	1123	498	672	776	564	772	545	599	974	728	1009	983	823	493	1022	513	484	485	849	1290	552	2416	2166	2440	773	968	1007	962	494	1088	435	519	750	885	1093
ENSG00000173208	225	ABCD2	0	1	0	0	0	2	1	0	0	0	0	0	0	1	0	0	0	0	3	3	0	0	1	0	0	0	0	0	0	1	0	0	0	0	0	0	2	0	0	0	0	1	2	3	7	2	0
ENSG00000117528	5825	ABCD3	10698	9077	9637	9245	10804	6546	5401	6356	5894	6062	5349	6428	4173	7138	7106	4813	5590	8125	9558	4596	6068	4365	8731	7864	4454	5190	8618	5475	6419	7200	4968	7406	6348	6529	8329	5562	4618	10528	11131	7889	12124	6799	5283	3918	3793	3339	9447
ENSG00000119688	5826	ABCD4	2211	2156	1902	1524	2001	914	1463	470	1443	1578	1056	1004	1172	1076	1008	1796	1475	1559	1442	1325	1386	913	1902	1751	3238	1563	2651	2429	1754	1763	1309	908	1434	839	1456	627	1707	1741	2370	822	1007	1872	2361	1609	1498	1515	1013
ENSG00000164163	6059	ABCE1	15491	13538	16299	9573	13598	8420	13477	9639	8164	10067	6291	14413	6846	10575	9506	9965	10532	8943	13944	8354	8280	8677	18377	18274	12247	8540	18104	12738	16879	15645	8293	17054	12350	6022	5523	6517	10624	12273	8994	9158	12608	10826	13845	11140	13404	10848	22644
ENSG00000204574	23	ABCF1	2390	2006	3761	1399	2413	2117	2988	3823	2445	2779	2483	3177	2163	4416	2354	2713	3450	4450	6136	2911	2887	2473	5241	5043	1388	947	4174	2675	3278	2718	1546	3919	4201	2300	3078	1980	2238	2624	2487	2484	2525	2370	2058	1654	1631	1287	4138
ENSG00000033050	10061	ABCF2	2683	3919	2216	753	1315	2169	2239	1930	1464	1580	1801	2057	1014	2603	2588	1687	2006	2074	4008	2483	1785	1820	2777	2346	1392	763	2387	1601	3574	2770	1974	2803	2030	4021	2927	3399	1273	3140	2418	2156	1282	1547	3201	2561	3076	1972	2735
ENSG00000285292	114483834	ABCF2-H2BK1	60	41	1	3	2	2	0	0	1	0	5	1	23	1	2	3	8	2	6	0	9	7	1	0	8	8	4	2	0	0	9	3	3	10	12	3	7	0	1	3	18	1	2	2	2	15	0
ENSG00000161204	55324	ABCF3	1841	1889	2882	1818	2627	2413	2379	3129	2681	2659	2804	3887	3233	3781	2388	2434	3566	4337	6280	2834	2825	2485	3600	3172	2934	1657	3470	2203	2475	2842	1490	3670	2805	3988	3825	3257	2224	2577	2653	3404	2580	2250	2991	2722	2759	2213	3190
ENSG00000160179	9619	ABCG1	1984	2096	323	190	172	371	54	43	203	438	9	231	794	185	64	397	4	4	57	153	1023	437	52	249	381	1151	19	94	1389	4371	918	138	197	248	368	687	895	102	211	551	1471	965	96	64	118	162	388
ENSG00000118777	9429	ABCG2	2675	2845	7141	10720	15658	677	115	415	207	459	101	73	917	5273	911	351	7641	21359	17274	4525	5689	5717	18	484	72	88	2551	58	1032	8	5586	840	796	803	665	482	329	108	310	158	1374	57	1135	1028	1798	1559	1516
ENSG00000172350	64137	ABCG4	0	0	0	0	0	0	1	0	0	0	3	0	2	0	2	1	4	2	5	0	3	4	1	5	3	0	0	0	0	0	1	1	3	0	1	0	0	3	1	1	2	0	4	1	4	1	0
ENSG00000138075	64240	ABCG5	11	12	47	52	36	30	0	6	0	1	8	3	10	22	2	0	3	2	4	20	53	21	13	32	0	2	0	0	8	2	6	13	5	27	16	37	9	36	83	18	20	12	52	26	18	16	103
ENSG00000143921	64241	ABCG8	11	10	28	103	36	13	0	1	0	0	1	5	6	20	0	1	0	2	1	13	107	38	2	34	2	1	0	0	8	0	8	15	10	6	7	7	20	14	40	9	36	36	26	15	27	42	84
ENSG00000143994	84696	ABHD1	8	44	4	4	3	37	65	18	58	48	99	77	61	32	98	51	25	18	24	42	56	64	45	57	120	71	107	145	10	25	48	51	30	31	23	13	5	10	7	42	1	40	127	135	154	133	44
ENSG00000144827	55347	ABHD10	1697	2658	4648	4875	4986	3178	3255	2657	2778	2628	2941	3137	3291	4355	2433	2422	6763	5038	7624	2470	2723	2352	2479	2653	2605	1691	3496	2866	2621	3147	2348	3070	2665	4250	3591	2940	3676	3323	3447	2773	3343	1959	4423	3257	3638	3394	3042
ENSG00000106077	83451	ABHD11	6476	5629	3678	2785	3296	2628	3269	2834	3109	3202	2287	2133	5625	2774	4583	1786	5800	3957	4877	2587	3526	1846	5190	3352	3101	1802	3665	2233	4630	3224	3814	2658	4486	2414	1471	1797	1372	5265	4986	2908	3492	2286	4889	3712	4081	3579	2678
ENSG00000100997	26090	ABHD12	3352	3708	3481	2637	2761	3895	2644	1844	5409	5818	4325	4406	6120	7517	3567	2754	3432	5379	4719	5697	9440	9871	4911	5272	4656	3763	3380	3023	4896	5086	3249	3018	3276	4545	5821	3819	4142	1387	1460	1406	1731	5150	4931	3516	3999	3301	1604
ENSG00000131969	145447	ABHD12B	22	25	1684	462	1451	0	3540	3066	935	222	4443	6316	4	732	14	13	2581	1753	3892	4	5	1	958	3359	1685	1065	3111	1326	24	585	569	2207	1700	171	1161	152	1301	10	9	2971	33	2	559	0	1	2	109
ENSG00000139826	84945	ABHD13	3737	3519	753	585	758	986	4094	553	1301	1363	1216	2297	904	1239	1441	2326	572	689	857	1185	970	549	2048	1724	1089	775	1530	998	2130	1623	1758	1559	916	3009	5444	3064	1525	887	1150	2294	1515	1905	1382	879	984	944	1203
ENSG00000248487	25864	ABHD14A	180	203	86	208	103	212	567	216	270	328	382	401	156	168	435	280	108	227	396	194	136	122	230	198	219	99	278	198	222	220	125	198	224	392	484	283	184	214	343	276	45	224	300	235	212	170	413
ENSG00000114786	100526760	ABHD14A-ACY1	13	19	31	54	30	17	43	12	23	45	41	54	35	27	35	31	46	34	19	26	51	25	39	26	14	12	19	29	29	23	12	38	64	53	58	31	36	43	10	37	33	39	17	12	20	4	42
ENSG00000114779	84836	ABHD14B	2285	3537	1827	2640	1946	4664	4289	5831	3999	3894	6112	3960	3965	2417	2925	3353	2550	3010	2499	3338	4182	3024	3117	3919	3889	2344	4651	3137	2441	2296	5574	4044	4025	5429	5333	4102	4589	3118	3154	4754	2994	3591	2302	1840	1792	1976	3687
ENSG00000168792	116236	ABHD15	1212	1058	2054	1336	1801	514	837	2150	947	1422	1985	1735	852	1356	843	698	2034	2708	3243	1322	1360	633	1497	2008	1900	1512	2421	999	877	1065	1863	1760	1558	562	874	541	575	1373	1814	1247	894	717	1598	1025	936	737	1160
ENSG00000204427	7920	ABHD16A	530	442	428	259	332	378	380	398	298	263	399	542	336	524	365	271	600	717	693	375	409	288	561	557	210	106	371	348	393	343	367	423	574	622	679	688	620	472	551	457	322	238	314	242	246	221	385
ENSG00000183260	140701	ABHD16B	0	1	0	0	0	1	0	0	0	1	0	0	0	0	1	0	1	0	0	0	0	0	1	0	0	0	4	0	1	1	0	0	0	0	1	2	0	0	0	0	1	1	3	0	0	1	0
ENSG00000129968	81926	ABHD17A	2489	1901	2426	1319	2134	1627	2661	1718	2936	3383	1771	1548	2334	2303	2027	2279	2128	4146	5536	1759	1464	1185	1965	1440	2226	1260	2852	1678	2619	2854	2151	3111	2147	2465	2179	2118	1596	2334	2154	2138	1396	2100	1950	1776	1389	1230	2234
ENSG00000107362	51104	ABHD17B	2384	2604	1343	1503	1550	1440	2165	861	1624	1540	1090	1367	2039	1971	2234	2542	1351	1055	2323	953	1432	976	1775	2159	1957	1718	2704	1884	2353	1793	1930	2069	1672	1630	1831	1250	1424	1803	2407	1321	1488	2458	2592	2124	2009	1641	2560
ENSG00000136379	58489	ABHD17C	6116	5019	6911	6238	6633	2468	5392	3974	4815	4881	2290	2695	3121	4794	2513	3260	2189	2696	2855	3281	6970	6479	4608	3966	3399	2156	3981	1774	3088	2820	4700	6475	4248	3822	3625	4469	3846	5255	5698	5199	4548	4550	3761	3595	2283	2685	4466
ENSG00000164074	80167	ABHD18	1464	1245	1108	1297	1383	713	1294	827	986	1113	511	902	817	1437	812	1203	1093	1092	1090	720	920	916	1396	1470	1258	1070	1769	1162	1121	1080	696	1213	1375	522	744	685	1245	1200	1256	794	2665	1061	984	733	980	1071	1576
ENSG00000140526	11057	ABHD2	20555	19677	23590	18533	20768	13390	32773	3563	7690	14273	8812	6514	6589	4907	7049	5323	2536	12586	5943	6120	12550	8479	33564	18005	6014	4120	7074	3951	22518	28036	17485	10210	6618	34470	39213	52631	5075	27751	44883	115693	19841	18747	19603	17695	11387	13582	8407
ENSG00000158201	171586	ABHD3	1100	1126	3576	4182	4587	1117	856	2059	1426	1489	1059	1945	878	2029	907	922	7573	7833	5494	1016	1073	1052	3976	1306	1062	1621	1759	830	686	585	1072	1686	1528	1090	2470	1209	456	2065	2868	791	1654	733	1663	1741	1018	1335	1562
ENSG00000100439	63874	ABHD4	856	1094	580	1155	767	346	206	317	750	512	265	705	508	449	606	502	636	1165	842	695	1373	2380	523	308	1176	1527	890	629	524	588	616	266	415	301	534	193	279	594	1198	245	799	178	556	364	514	676	561
ENSG00000011198	51099	ABHD5	788	746	1031	1698	928	693	953	1533	1024	1079	944	1108	925	861	899	717	648	1012	1083	632	839	623	1500	1425	425	488	990	404	1399	995	623	1448	1090	968	1751	1114	771	2513	2304	922	1506	952	973	963	814	585	1501
ENSG00000163686	57406	ABHD6	599	1370	1131	1751	1227	2246	1081	3278	1388	1474	2879	1889	995	872	3090	1115	907	1598	1897	962	637	587	3375	1687	1138	1146	1817	736	1482	1312	989	3311	2932	3889	7964	1670	1190	3399	3365	3504	1602	1736	1353	1505	958	731	2757
ENSG00000127220	79575	ABHD8	330	432	70	28	66	286	460	185	253	239	221	253	303	179	409	351	127	130	413	95	111	71	353	163	44	42	171	86	367	650	67	431	423	307	395	260	183	14	223	285	294	347	5	36	16	32	110
ENSG00000136754	10006	ABI1	5192	5745	4928	6958	6143	2666	3533	4811	4396	4558	3005	4631	4862	3793	3053	3331	5370	7469	7713	5909	11123	6488	5363	5055	3754	3050	4473	3697	4196	5012	3076	4296	4990	2764	7298	2436	4246	3825	4980	4202	4003	3986	4037	3085	3294	3378	4350
ENSG00000138443	10152	ABI2	1378	2147	1431	1319	936	2060	3221	1883	2428	2711	2431	1942	1919	3259	3422	2844	5641	3399	3281	3437	3992	3891	2282	2701	4708	3980	2805	5840	2077	3346	2352	3629	5175	3704	5238	3605	3185	3003	2671	2093	1827	3708	5158	3556	5203	4870	1431
ENSG00000108798	51225	ABI3	0	0	0	1	0	0	0	0	0	0	0	0	0	1	0	1	2	1	10	0	1	0	1	0	2	0	3	0	0	0	0	0	0	0	0	0	0	0	0	0	0	0	0	0	1	0	0
ENSG00000154175	25890	ABI3BP	0	0	0	0	0	1	0	0	0	0	0	0	3	0	0	0	0	0	0	0	4	1	0	0	4	17	0	5	0	1	0	0	0	0	0	2	0	0	0	0	2	0	11	3	11	41	2
ENSG00000119328	54942	ABITRAM	3418	4063	1008	866	936	1437	740	750	1090	971	1207	1224	1406	1505	1630	2147	1378	1170	2295	826	1152	1393	880	1384	1306	831	1181	1132	1396	1295	1462	1986	1450	1446	1289	1160	833	874	841	1344	1379	986	1948	1333	1703	1269	1220
ENSG00000097007	25	ABL1	4061	4646	3107	3105	2847	3052	3832	1866	3342	3422	2164	2926	4493	4099	3540	5000	3530	3029	5106	2006	2024	1465	3200	3661	5816	4319	4066	4312	3712	2749	3330	2694	3132	2836	2865	2601	3015	2867	4133	2418	3001	3724	4911	3820	3307	3058	5245
ENSG00000143322	27	ABL2	3005	3644	1084	1359	1259	1845	2230	1436	3171	3173	1203	1316	2628	3085	1272	1633	4379	2085	4601	2135	3064	2463	5021	2461	2203	2758	2053	3111	1654	1812	1994	3042	2842	1957	2357	2121	1304	1029	1295	2196	3301	2709	3732	2245	2816	2807	3320
ENSG00000099204	3983	ABLIM1	15387	19445	7709	12501	12316	4562	10598	6504	13263	18558	7330	11300	7034	4847	9180	6880	2400	7197	7974	4391	5108	3723	6110	6624	4350	2848	5163	3442	8067	5632	6045	4156	5004	11410	9783	13428	10398	7723	8732	14219	8389	5884	11485	8394	8971	6436	5223
ENSG00000163995	84448	ABLIM2	3017	4465	339	193	343	714	1555	314	755	1126	719	668	1115	58	697	651	1015	775	609	394	889	1010	2413	1593	740	1086	478	332	1019	1233	1541	821	653	1036	1837	1688	404	387	394	2152	1610	1352	266	172	201	354	319
ENSG00000173210	22885	ABLIM3	13	9	391	112	417	129	6	0	3	10	9	1	2	1	6	2	160	325	152	6	19	11	136	90	0	0	0	0	175	12	57	10	6	35	64	189	58	272	302	11	91	17	76	135	65	37	0
ENSG00000175164	28	ABO	813	627	385	528	504	202	477	169	507	471	211	194	463	225	213	452	286	23	91	264	466	128	208	403	729	835	378	390	204	275	754	60	160	142	280	229	288	375	447	288	551	99	162	144	160	181	238
ENSG00000159842	29	ABR	3644	2462	3830	3618	4052	2053	2166	2107	2915	3820	2523	2326	2293	2779	2435	2618	3574	4778	5022	2675	3208	4140	3417	3094	5072	3585	3702	3170	2206	1943	2157	3670	3781	1904	1936	1908	1960	3010	3456	2488	5300	2005	2285	1676	1421	1299	2690
ENSG00000174429	137735	ABRA	0	0	0	0	0	0	0	0	0	0	0	0	0	1	0	0	0	0	0	1	1	0	0	0	4	0	0	1	1	3	0	1	0	0	0	0	0	0	2	1	0	0	0	0	1	0	0
ENSG00000146386	58527	ABRACL	4709	3133	5299	4157	5357	3559	3507	3837	2645	2388	5336	8195	3516	4573	3610	3172	4265	3979	6017	3845	6773	6890	6446	7956	2652	1248	2786	1154	4189	3410	1574	6001	7531	2503	2475	2413	5024	3811	4333	5590	5046	1734	2562	1495	2126	1702	6383
ENSG00000163322	84142	ABRAXAS1	391	543	656	540	608	1065	690	325	704	741	601	677	753	491	565	746	1088	992	745	330	776	663	974	504	1263	1039	1150	2073	757	1150	843	351	995	577	434	476	1187	288	629	443	904	804	1013	453	1038	1161	818
ENSG00000165660	23172	ABRAXAS2	2092	2088	2020	2013	2229	1012	1708	1729	1510	1577	1205	1290	1867	1718	1320	1376	1359	2186	2515	1166	1667	1656	2925	2454	1950	1498	2420	2136	1781	1887	1404	1656	1954	1676	1950	1757	2815	1497	1617	1518	2008	1592	2203	1814	1999	1805	1525
ENSG00000146109	29777	ABT1	2581	2177	3058	1748	2586	2313	3929	3662	3094	3224	2373	2569	2554	4691	1834	2243	2655	2816	4102	2143	2387	2421	3566	3563	1542	907	3335	2704	2931	2313	1581	3324	3294	2477	2696	2530	3637	2284	2009	2016	1883	1973	1555	1592	1354	1358	3186
ENSG00000114626	80325	ABTB1	113	237	309	381	410	584	249	340	490	508	468	832	1202	401	271	220	605	538	411	293	1195	1652	459	419	589	451	288	356	127	198	357	312	647	671	991	703	404	120	273	749	722	464	154	189	141	388	220
ENSG00000166016	25841	ABTB2	970	1296	772	619	733	686	202	542	321	245	726	1363	229	435	442	859	767	1758	1271	700	1227	1300	2581	1329	403	482	424	104	1296	1258	632	827	459	732	2150	893	569	1039	1225	1257	393	767	479	434	412	390	1187
ENSG00000151136	121551	ABTB3	10	39	346	184	227	157	302	0	144	246	30	22	9	58	5	3	6	285	192	10	17	4	47	19	2	0	0	0	42	154	24	38	144	63	67	211	1309	379	835	199	111	1057	24	130	37	43	2
ENSG00000278540	31	ACACA	3006	3857	6484	6246	6193	6270	6313	7665	6451	8305	11989	9284	5965	11749	5786	4336	8313	8870	9166	7696	7233	6159	14149	11381	8129	7452	11729	9796	4666	6082	8733	8969	7154	6139	5933	5896	4782	8035	8039	8540	10203	6901	7537	3980	4226	3481	10609
ENSG00000076555	32	ACACB	350	204	287	1377	239	810	405	793	882	898	1110	822	1305	1016	1127	943	791	1025	976	992	1357	457	647	589	1340	751	921	417	375	673	11	655	1055	1141	1028	1268	1366	1634	2339	949	2221	699	773	414	680	415	643
ENSG00000111271	80724	ACAD10	2912	2821	1690	3251	2206	3101	1168	1393	1544	1456	2088	3005	2490	2210	1239	2060	1631	1822	1629	2498	4933	3213	1924	1808	3601	2261	3018	2587	1879	2575	2770	2219	4023	2317	2240	1449	2582	2610	3127	3985	5284	1798	2274	1446	1365	1310	2613
ENSG00000240303	84129	ACAD11	94	228	111	87	87	223	114	115	82	88	186	179	169	103	89	224	133	85	172	129	106	139	57	70	280	179	188	321	106	126	81	201	131	225	222	117	127	124	142	163	151	162	226	194	294	231	129
ENSG00000151498	27034	ACAD8	960	1145	1497	986	1514	2129	1683	1736	1424	1439	1914	2335	935	1822	914	959	1258	1510	1637	1512	1153	880	1815	2213	1482	624	2256	1005	1343	1379	1398	2136	3387	2248	1966	1660	1464	1533	1897	2155	2544	1846	2576	1885	2142	1695	1430
ENSG00000177646	28976	ACAD9	1125	1201	2461	1642	2336	1966	3431	3515	2456	2419	3318	3812	2707	3969	2492	3202	1913	2490	2496	3163	2006	1423	3195	3313	2297	1662	2956	2355	3036	2933	1425	3653	3188	2639	2519	2173	2767	3511	2992	2400	2143	2178	3863	3475	2816	2236	3219
ENSG00000115361	33	ACADL	0	0	0	0	0	0	0	0	0	0	0	0	0	0	0	0	0	0	0	0	0	0	0	0	0	0	0	0	1	0	0	0	0	0	0	0	0	0	0	0	0	0	15	4	11	9	0
ENSG00000117054	34	ACADM	600	1022	2065	2189	2653	3795	2507	2068	2048	1921	2988	3224	1470	1596	2486	2064	2024	2082	2632	1736	1427	516	3120	2063	2339	1774	3404	2694	2476	3243	1379	1451	2689	3537	2245	2791	1891	3187	3787	2362	5021	2959	2399	1883	1608	1617	1319
ENSG00000122971	35	ACADS	2257	1829	3709	10078	5840	1046	427	1063	1823	1595	1658	1984	3427	2248	973	1839	1376	2322	1664	1414	2249	1525	1240	1810	3950	2091	2466	1232	1019	1303	1392	1571	2574	1939	1731	1243	2422	2023	3391	1766	3150	1259	1951	1329	2015	1504	1783
ENSG00000196177	36	ACADSB	611	965	1426	1296	1457	1135	1314	1806	1400	1429	1588	1526	1125	1152	1301	819	629	1178	1559	742	651	423	1541	1434	1984	935	1670	2394	1593	1473	1100	1736	1696	1793	1427	2053	2781	1818	2240	2408	802	1165	1716	994	1202	861	1410
ENSG00000072778	37	ACADVL	24758	17146	13675	26518	21756	11379	10006	7346	17120	16717	17731	17439	11389	12577	12476	12644	15251	14031	12810	14887	26569	40046	17548	12577	20980	14482	13327	13820	10151	8848	13580	12904	19798	19570	29693	11538	12633	18006	23404	18073	23123	10640	9081	8222	5499	6696	9485
ENSG00000157766	176	ACAN	0	0	0	0	0	0	1	1	0	0	0	0	0	0	0	0	0	1	1	0	0	0	1	1	0	0	0	0	0	0	1	0	0	0	0	1	2	0	0	2	0	0	0	0	0	0	0
ENSG00000072818	9744	ACAP1	105	78	8	49	15	25	27	10	215	135	182	224	42	19	23	25	24	20	25	19	12	20	15	52	38	15	14	6	35	13	5	6	27	256	89	65	19	20	20	200	33	19	12	8	12	19	6
ENSG00000114331	23527	ACAP2	5659	5807	5931	7623	6923	2824	3388	8510	5396	5507	5728	9610	7069	6090	4147	4870	11316	12577	9846	5488	10010	8590	5278	5999	5833	4897	8375	4512	4436	5245	2890	6750	6512	6628	8104	5578	4516	4764	5869	7606	10393	4291	7436	4869	6350	6069	5918
ENSG00000131584	116983	ACAP3	3652	4036	3428	1917	3284	1946	1936	2623	1558	1713	2385	2785	2656	2297	2346	4044	1407	3926	2741	1746	1734	1202	6653	3391	2005	1479	2923	2601	4980	5955	2363	2155	2919	2133	3428	2004	1664	3590	3087	3257	4986	1075	2065	2471	1435	1344	2475
ENSG00000075239	38	ACAT1	804	2127	5557	6680	5885	9061	8406	8414	3967	3951	11183	8302	3202	9382	6799	4442	5922	4834	9089	5962	5521	5275	8417	7999	7209	4034	9577	3226	6182	5498	3122	10144	12073	5776	5015	3553	5162	4610	6025	7432	8254	3511	8659	5920	6969	5376	8114
ENSG00000120437	39	ACAT2	6554	2727	17370	13603	19115	3150	11930	12336	11397	14812	12508	10803	8692	15821	7874	10754	14622	18584	21306	10798	14633	12156	17932	19103	5165	4514	5866	2939	6781	5344	7244	21388	17857	5376	11831	4129	3996	10589	9870	7261	8131	4315	5563	4160	4026	3359	16398
ENSG00000182827	64746	ACBD3	5699	4756	3968	5768	5521	2280	3547	3063	3424	3140	2211	2347	3291	3747	2740	2501	7129	2991	5868	1998	3913	4469	7492	5919	3758	4448	4056	3532	1727	1681	2173	3625	4176	3808	5889	3343	2331	2753	3040	3760	9433	2076	4080	3591	3521	4036	3391
ENSG00000181513	79777	ACBD4	288	795	667	674	917	778	437	664	737	776	545	600	903	653	468	676	1093	959	728	825	1004	833	242	426	1556	957	1135	1101	335	454	1294	542	1250	345	617	274	834	556	586	574	1103	739	523	499	651	841	402
ENSG00000107897	91452	ACBD5	3400	3143	6091	8295	7343	1637	2072	4012	2706	3005	1670	2139	4277	4303	2292	1568	4995	7030	6476	2943	12534	10998	4999	3385	5393	3722	6463	3919	2973	1987	2277	2761	3320	1405	2616	1325	2281	4912	5853	1941	4513	1999	5306	4211	4336	4105	4284
ENSG00000230124	84320	ACBD6	2710	3225	1929	1637	1780	1759	2856	2405	3133	3043	2280	1693	2468	2989	1555	2296	2802	1376	3885	2849	2425	2003	5255	4559	2654	1921	2758	2715	2126	2903	1727	4287	2105	2213	2666	2016	1702	2112	1933	1962	1555	2460	4687	3835	3356	3206	2369
ENSG00000176244	414149	ACBD7	133	288	65	120	98	145	520	125	229	137	560	277	326	62	975	635	125	120	288	347	701	490	199	376	333	193	146	230	254	549	94	215	261	119	442	115	788	206	655	915	224	2154	3287	2223	1940	2056	180
ENSG00000110455	84680	ACCS	516	642	84	16	28	456	337	156	68	80	427	305	474	715	122	299	194	131	256	419	928	290	22	58	389	144	110	412	179	457	800	331	264	314	192	267	739	172	328	232	205	243	197	148	148	255	423
ENSG00000205126	390110	ACCSL	0	0	0	0	0	0	0	0	1	3	0	0	0	0	0	0	0	0	2	0	1	0	1	1	0	0	0	0	0	0	0	0	0	0	0	0	0	0	0	1	0	2	0	0	0	0	0
ENSG00000102977	65057	ACD	1114	1273	1482	530	842	1453	853	1049	985	1111	1395	1270	1444	1635	926	860	1803	1308	1901	1282	1513	1032	1401	1510	1649	767	1596	1102	2480	2136	1142	2321	1850	1123	765	997	1430	2444	1539	856	812	896	908	1366	867	977	1266
ENSG00000159640	1636	ACE	1999	1237	173	158	111	48	517	101	52	59	444	1127	787	442	319	628	717	36	165	880	2419	1181	73	338	1355	480	255	477	186	164	591	505	708	581	1774	604	579	80	121	1180	720	430	375	142	315	354	113
ENSG00000130234	59272	ACE2	1227	197	406	891	354	258	51	834	1063	422	71	548	125	2462	1	141	172	282	474	782	2783	776	6	35	2936	2745	2958	151	782	384	115	829	122	32	308	60	84	197	142	2374	1832	50	38	46	62	74	1652
ENSG00000167769	125981	ACER1	0	0	0	0	0	0	2	0	0	0	0	2	1	0	3	0	0	0	0	0	0	0	0	0	5	0	1	0	0	0	1	0	0	0	1	1	0	1	0	1	0	0	0	0	0	0	0
ENSG00000177076	340485	ACER2	1031	530	1062	1264	1910	497	450	280	1273	1571	389	3433	400	828	596	522	604	4195	2474	380	821	965	309	463	552	1743	1658	489	646	111	487	182	399	360	1543	271	185	478	1062	5906	775	608	190	175	159	107	609
ENSG00000078124	55331	ACER3	1529	1582	1591	1587	2056	1528	1705	1525	1427	1570	1432	2560	754	1761	1654	1834	1076	1360	1576	1445	1808	1529	1748	2139	900	1051	1808	720	1753	1822	1152	2277	2208	2775	4572	2555	1377	1963	2062	2574	1567	933	2246	1916	2093	1671	1930
ENSG00000087085	43	ACHE	180	47	6	9	4	4	3	8	1	0	14	18	35	9	6	9	13	13	480	8	39	63	10	6	3	7	8	0	85	24	15	29	26	4	3	11	7	7	2	24	63	21	14	15	37	46	8
ENSG00000100813	22985	ACIN1	8236	5859	7936	6918	7769	3903	7342	5316	8741	8820	5204	6710	6270	9291	6330	7228	6807	6849	7891	5035	5063	5618	11938	9964	8831	5251	9166	8162	7884	8268	4903	7103	7355	4668	7411	3931	5270	9708	9598	4800	5791	5884	7929	7319	6981	6569	8058
ENSG00000213088	2532	ACKR1	0	0	0	0	0	0	0	0	0	0	0	0	0	0	0	0	0	0	0	0	0	0	0	0	0	0	0	0	0	0	0	0	0	0	0	0	0	0	0	0	0	0	0	0	0	0	0
ENSG00000144648	1238	ACKR2	30	16	21	122	33	14	11	32	73	40	3	5	18	51	17	28	41	109	13	10	10	30	15	8	63	220	72	30	8	18	7	15	50	5	4	11	17	4	9	27	27	12	7	4	9	17	6
ENSG00000144476	57007	ACKR3	3	10	0	0	0	27	34	1	32	16	132	25	49	27	74	686	0	6	8	8	19	50	0	4	155	1	6	4	159	51	298	282	579	12	27	4	11	0	0	233	32	15	87	7	23	51	49
ENSG00000129048	51554	ACKR4	2	26	49	79	43	24	0	0	0	5	1	4	4	0	0	0	2	0	0	311	494	216	1	0	1	0	0	0	2	1	33	0	0	1	1	3	7	13	148	1	25	1	134	143	125	186	0
ENSG00000131473	47	ACLY	11232	13737	36799	31651	42076	25164	26028	35564	31483	42848	53081	40835	23588	43907	20555	19868	46537	50430	74295	32681	39720	33442	44794	36962	31305	27847	46575	32381	16804	19863	39707	44619	36834	27395	31756	20583	20879	29651	26589	27619	25695	18780	30479	18044	17973	13207	26602
ENSG00000153086	130013	ACMSD	35	4	8	1	0	0	0	0	0	0	0	0	0	35	0	0	23	7	208	14	107	33	0	0	0	0	0	0	0	0	0	1	0	4	0	0	3	0	0	0	0	0	5	38	4	22	12
ENSG00000122729	48	ACO1	5787	7232	6422	5861	8612	6014	4313	3276	4811	4991	5052	5140	5300	6524	4338	5878	3891	4402	8944	3162	3842	3159	5888	6844	5197	4017	7070	3594	6427	4685	5575	7975	6218	5760	2585	5298	3005	6260	6877	5679	6031	7832	2959	2203	2913	2518	5457
ENSG00000100412	50	ACO2	13977	11476	11714	12586	14613	7087	10221	10084	9045	10355	7835	9828	7215	13087	7541	9911	9130	9313	10409	7579	10855	6832	12865	9791	10304	9571	13147	9452	7011	9328	8781	7946	10899	12092	11349	9874	7147	9606	8826	8388	21323	7176	7135	4894	5799	4765	11698
ENSG00000102794	730249	ACOD1	0	0	0	0	0	0	0	0	0	0	0	0	0	0	0	0	0	0	0	0	0	0	0	1	0	0	0	0	0	0	0	0	0	0	0	0	1	0	0	0	0	0	1	0	0	0	0
ENSG00000184227	641371	ACOT1	166	240	109	155	161	81	293	145	108	125	174	109	194	210	121	108	147	296	305	126	133	143	52	54	177	108	237	116	351	210	137	221	322	112	239	108	138	308	402	161	140	296	896	600	649	593	138
ENSG00000162390	26027	ACOT11	4898	4909	5415	3374	6017	3351	5258	3245	7510	7735	2151	4254	1653	4618	2093	3506	2812	4858	5491	4751	4073	3352	2936	2963	1608	3029	2108	1298	2014	2057	1677	2539	2965	3864	5982	3094	999	1945	2109	5600	3753	2468	1161	1239	1064	800	4788
ENSG00000172497	134526	ACOT12	0	0	0	0	0	0	0	1	0	0	0	0	0	0	0	1	0	0	0	0	0	0	0	0	0	2	0	1	0	0	0	0	0	0	0	0	0	0	0	3	2	0	1	0	2	2	0
ENSG00000112304	55856	ACOT13	2043	1854	2309	3838	2583	1594	2318	5365	2788	2199	2178	3020	3812	5982	2250	5109	2977	1719	2843	2462	4318	4121	1612	2378	5497	3775	4971	4513	1872	2116	1593	3340	6217	1800	1939	1730	2385	1378	1247	1727	4721	1510	1189	906	1198	1403	3490
ENSG00000119673	10965	ACOT2	576	593	496	415	486	331	377	423	325	329	367	165	445	370	317	290	189	292	444	319	415	480	132	182	823	415	1315	536	995	578	478	466	626	164	263	159	547	558	819	240	426	660	900	540	540	490	457
ENSG00000177465	122970	ACOT4	127	168	27	31	46	16	33	78	27	33	82	52	21	64	28	79	27	53	37	43	34	39	17	58	40	11	52	20	70	84	8	92	124	28	17	21	40	81	120	116	35	53	216	127	149	58	38
ENSG00000205669	641372	ACOT6	0	0	0	2	0	0	1	0	0	0	0	0	2	1	0	2	1	3	0	2	2	2	0	0	0	0	0	3	0	0	0	1	3	0	0	0	0	0	0	0	1	0	2	1	3	1	3
ENSG00000097021	11332	ACOT7	3815	2094	4163	3026	3503	1441	1321	1950	1317	1514	2571	1905	1425	3807	1487	1652	1549	3096	3078	2585	2291	1387	4516	3490	1317	542	1069	741	2251	3360	1908	3000	1667	1742	2789	1946	2502	3508	2638	2953	1409	847	1316	1412	1164	949	2606
ENSG00000101473	10005	ACOT8	2686	2427	1557	1400	1431	2429	1804	3488	2161	2111	2701	3313	2524	4031	2561	2322	1246	1813	2854	2126	2867	3875	2914	3126	2021	1061	1511	1456	3460	2949	1683	3398	5530	3474	2816	2751	2058	1313	1858	4244	3140	1666	1153	820	1216	1019	2659
ENSG00000123130	23597	ACOT9	1918	4799	2270	2546	2833	2633	2208	2628	2592	2448	3256	2910	2729	3957	2787	1267	3221	2284	3545	3181	3975	4264	4044	3947	2048	1778	2512	1984	2560	2231	2937	5875	2597	4083	6446	3815	2899	4893	4428	3152	2377	1619	2967	3236	2231	2018	2086
ENSG00000161533	51	ACOX1	7876	8598	8383	11895	12998	8290	9816	17072	17046	21264	8329	11752	11201	12720	9306	8801	10374	13033	13519	11299	19247	20214	14517	15677	15315	16886	15144	11248	6029	4963	10176	10335	16937	17849	19192	15748	7046	11970	14557	23869	23825	13058	7818	6668	6743	6243	10811
ENSG00000168306	8309	ACOX2	965	1464	435	2001	742	2606	3699	1225	2119	3253	1795	3819	2678	1926	5140	2377	229	282	181	919	718	166	300	828	1760	569	1055	882	274	142	1882	3339	3119	6779	3994	5001	2003	1333	1176	2690	2873	1731	149	200	270	332	1954
ENSG00000087008	8310	ACOX3	1501	1453	1491	1485	1920	827	747	942	1019	1082	663	1306	1035	895	460	893	722	1124	1037	673	829	530	1518	1190	1556	1402	1825	1209	823	1339	1455	1273	1478	1177	1102	1036	845	1150	1288	1361	1145	994	455	265	311	356	1578
ENSG00000153093	55289	ACOXL	0	0	0	0	0	6	10	1	3	2	56	18	2	4	21	19	94	23	19	1	2	1	227	23	5	5	0	0	29	32	3	5	1	20	9	8	9	12	4	15	2	4	69	24	32	24	7
ENSG00000143727	52	ACP1	7554	8126	8007	5900	6962	7066	7497	5923	10603	10234	5708	6132	6439	12481	6947	6665	6509	6215	9913	5884	8507	8061	6725	8901	9367	5698	8636	7269	6782	7727	7453	10417	9240	9422	11054	7370	5901	6233	6017	8855	7365	7874	10921	8471	10606	8475	7629
ENSG00000134575	53	ACP2	1376	1556	1450	661	1201	1488	1821	1563	1620	1687	1294	2273	977	1525	944	1079	1164	2504	2283	1435	1796	1019	2008	1680	1546	798	983	1593	1242	1507	1042	1149	2003	1657	2681	1574	1518	1251	2059	2460	751	2224	1093	897	742	860	1801
ENSG00000014257	55	ACP3	374	633	596	1701	1130	310	808	1286	1095	672	1367	4904	238	153	776	1280	376	692	346	1491	2164	2780	33	134	587	114	604	148	172	90	55	48	394	988	1327	206	2	356	233	1425	188	495	425	178	818	895	622
ENSG00000142513	93650	ACP4	0	1	0	0	0	3	22	0	1	0	1	1	4	0	2	1	0	0	0	4	1	0	0	3	0	0	0	1	3	1	8	1	0	14	3	23	0	0	0	1	1	8	1	1	1	1	3
ENSG00000102575	54	ACP5	61	36	42	310	55	956	507	2	379	384	1206	739	1107	598	1070	490	7	37	4	133	386	165	766	1084	1583	865	1728	814	357	869	253	511	545	1449	507	1890	421	320	557	765	837	741	14	65	106	230	815
ENSG00000162836	51205	ACP6	2537	3148	961	1458	1163	857	675	1500	1847	1679	1568	1504	898	2088	927	1222	1365	874	1339	1878	2704	2468	2873	1835	1705	1569	1320	1463	1861	1514	1915	1658	1316	1922	1487	1502	1120	2178	1915	1094	1969	1206	1892	1494	1232	1314	1086
ENSG00000183760	390928	ACP7	4	40	0	0	0	14	4	0	0	0	8	2	0	1	20	0	0	1	0	11	8	12	18	19	1	0	0	0	38	2	32	3	7	15	28	57	7	8	22	34	0	9	44	44	43	70	0
ENSG00000100312	49	ACR	0	0	0	2	1	0	0	0	0	0	0	0	0	0	0	1	0	0	0	0	0	0	0	0	0	0	0	0	0	0	0	0	2	1	1	1	1	0	1	1	0	0	0	0	0	0	1
ENSG00000111644	84519	ACRBP	40	50	21	27	16	44	30	13	29	41	35	10	90	15	9	39	21	21	21	31	177	143	66	24	128	81	159	132	7	9	22	18	26	25	28	24	23	29	34	14	52	57	116	66	113	198	11
ENSG00000134940	56	ACRV1	0	0	1	0	0	1	0	0	0	0	0	1	1	2	0	3	0	0	0	1	5	0	4	4	1	0	0	0	0	0	1	2	0	0	0	2	2	0	1	0	0	0	6	3	5	6	1
ENSG00000103740	23205	ACSBG1	55	12	12	81	72	5	18	8	9	9	10	5	9	26	13	5	2	19	14	4	2	0	6	20	18	1	16	5	9	4	13	10	6	10	14	2	4	3	2	6	13	9	10	33	7	9	7
ENSG00000130377	81616	ACSBG2	2	4	1	3	1	25	2	26	2	5	5	11	14	22	6	43	0	0	8	3	12	0	2	17	5	1	2	7	0	0	2	44	10	3	1	9	11	0	0	4	7	1	0	1	0	1	1
ENSG00000167107	80221	ACSF2	364	694	1067	7713	3635	2764	932	4596	6469	5206	3013	4717	4199	2453	1519	3093	3172	2817	1268	1618	5645	4683	2065	3648	9375	4824	3565	3842	604	1472	2252	1677	3161	1870	1365	486	1999	1095	1581	5731	8947	2310	1103	765	1686	2460	1633
ENSG00000176715	197322	ACSF3	4483	4360	3901	4808	5339	3288	2611	1783	1944	2066	3259	2912	4646	1975	1433	2807	2296	1570	2175	2656	4767	2195	2508	2572	2783	1469	1969	2119	2021	2510	3146	3155	2854	2525	3615	2760	3779	3459	3489	2748	5367	2872	1593	1885	1308	1822	2458
ENSG00000151726	2180	ACSL1	15884	7726	13905	27306	22411	4680	8618	4230	10840	12612	7093	11950	2919	676	11443	12914	3006	3287	5271	8801	12238	11118	13210	9469	181	3138	1788	288	7565	5668	6524	4690	2710	6922	11466	6489	1815	14246	19561	8019	15698	7236	9486	6141	11309	6703	14417
ENSG00000123983	2181	ACSL3	27195	18079	19683	23078	23709	10793	12772	12515	10336	13874	9336	9035	4588	12837	12889	11394	16740	12106	12234	12871	24013	23100	15172	17382	9608	13149	11601	11857	11600	13522	12494	22010	17221	23022	37416	19922	13393	22260	18210	10930	11435	16206	20830	16269	21974	17518	16176
ENSG00000068366	2182	ACSL4	2488	2460	5973	6902	8519	8413	4477	7559	3039	4902	5780	6137	11067	9830	3194	6341	4130	4128	3918	6636	11909	10040	6092	6606	5472	6057	7607	5091	5195	4514	3739	9885	5289	13889	11559	9465	11196	15995	16847	6170	7229	5240	8484	5834	7431	7309	7885
ENSG00000197142	51703	ACSL5	20307	25109	11907	15240	13130	13083	10112	12812	21722	21399	14036	32895	30927	10916	15031	14281	7987	13507	6848	9448	17636	13137	17209	15818	30868	23393	16628	27190	11636	11962	16711	9875	11794	29543	22358	28394	10337	28460	28005	21880	18773	20709	19574	16470	13089	12258	17295
ENSG00000164398	23305	ACSL6	786	2721	66	3134	100	1903	9024	645	3394	4341	1026	1937	2415	2235	3687	1069	75	362	134	110	77	17	872	1104	5048	4049	1425	5302	23	54	2268	604	630	8280	4181	6036	691	65	10	3179	390	713	36	59	30	51	1700
ENSG00000166743	116285	ACSM1	0	1	4	16	22	12	0	5	13	10	12	46	31	13	4	11	10	2	11	10	13	2	2	13	12	8	14	9	2	4	18	2	6	22	8	7	7	12	11	15	11	64	4	2	2	10	2
ENSG00000183747	123876	ACSM2A	0	0	0	0	0	0	0	0	0	0	0	0	0	0	0	0	0	0	0	0	0	0	0	0	0	0	0	0	0	0	0	0	0	0	0	0	0	0	0	1	0	0	0	0	0	0	0
ENSG00000066813	348158	ACSM2B	0	0	0	0	0	0	0	0	0	0	0	0	0	0	0	0	0	1	0	0	0	0	0	0	1	0	0	0	0	0	0	0	0	0	0	0	0	0	0	0	0	0	0	0	0	0	0
ENSG00000005187	6296	ACSM3	1354	1181	731	3345	1360	2344	154	2494	2274	1698	2122	6319	2103	3390	291	1463	884	871	349	1330	7828	3571	359	1957	6442	3194	5060	2661	199	149	585	587	1972	788	261	301	1934	846	525	1902	6978	1162	157	191	226	470	4628
ENSG00000215009	341392	ACSM4	0	0	0	0	0	0	0	2	0	0	0	0	0	0	0	0	0	0	0	0	0	0	0	0	0	0	0	0	0	0	0	0	0	0	0	1	0	0	0	0	0	0	0	0	0	0	0
ENSG00000183549	54988	ACSM5	0	0	0	0	2	0	0	0	0	0	0	0	0	0	0	0	0	0	0	0	0	0	0	0	1	0	0	0	0	0	0	0	0	17	16	0	1	0	0	0	0	0	0	0	0	0	0
ENSG00000173124	142827	ACSM6	0	0	0	0	0	0	0	0	0	0	0	0	0	0	0	0	0	0	0	0	0	0	1	0	1	0	0	0	0	0	0	0	0	0	0	0	0	0	0	0	0	0	0	1	0	0	0
ENSG00000154930	84532	ACSS1	6872	7189	2270	1596	1610	4622	3608	1685	2682	2893	6626	4263	5810	3055	5345	4968	806	1053	2208	8995	10432	5357	7717	9894	2299	1520	1012	2568	4406	4147	12018	6328	4984	4795	849	3906	5396	1098	1159	4937	2440	6220	2433	1419	1511	1364	1958
ENSG00000131069	55902	ACSS2	16798	8998	19347	35216	33916	9791	7954	18552	17546	23204	14650	11023	18737	12154	14814	18398	22637	18085	19711	13866	25608	28962	11965	15117	7330	12650	6843	5339	6704	5686	14694	15271	23217	19353	21876	9491	8199	10225	11647	15314	33858	8588	8685	5339	10025	10177	12815
ENSG00000111058	79611	ACSS3	5	19	0	1	1	34	0	12	0	1	3	5	3	32	1	5	0	7	2	6	8	8	0	0	0	0	0	0	4	24	0	1	6	7	0	0	3	40	49	0	90	46	7	7	9	5	124
ENSG00000143632	58	ACTA1	4	0	4	13	6	5	9	6	10	2	5	9	8	5	5	3	9	5	17	5	6	3	7	5	2	5	12	5	1	9	5	8	7	2	8	1	1	4	1	7	6	1	3	7	9	1	5
ENSG00000107796	59	ACTA2	8	44	214	224	193	28	245	41	218	231	10	2	183	5	0	37	104	21	33	74	181	44	36	11	146	118	105	56	114	111	21	94	190	14	12	11	41	365	959	24	12	148	149	63	176	290	32
ENSG00000075624	60	ACTB	123300	99801	207629	135716	187689	72453	158154	138367	110271	130235	110643	145450	119321	177967	100423	77226	93476	144565	189611	138821	132459	127615	154537	116998	101709	89470	171086	74399	167620	159558	80163	195142	135642	105308	144371	127195	79648	288910	230473	96937	88223	48264	181827	199788	174709	120564	147979
ENSG00000169067	345651	ACTBL2	0	2	0	0	0	2	0	0	0	0	4	0	0	1	3	0	4	9	33	0	0	0	4	1	0	0	0	0	0	0	3	0	0	0	0	0	0	0	0	8	0	0	0	4	0	0	0
ENSG00000159251	70	ACTC1	0	1	0	0	0	0	0	0	1	2	0	0	0	0	1	0	0	0	1	0	0	0	1	0	1	0	0	0	0	1	1	1	2	0	0	1	0	1	0	0	1	0	0	0	0	0	0
ENSG00000184009	71	ACTG1	83838	84236	196890	162841	231537	122274	163583	86839	272951	300268	99490	115662	106888	181977	72180	86504	166539	193455	239572	44771	38833	31460	238581	220415	198670	201184	229233	183033	87400	82999	170047	149461	129485	110689	266371	101803	192033	165179	130722	104876	130941	199137	140970	181548	80430	106349	130266
ENSG00000163017	72	ACTG2	0	0	0	3	0	0	6	1	1	0	0	1	1	0	1	2	0	1	4	0	1	0	0	0	0	0	0	0	1	4	0	2	0	2	2	3	2	12	1	0	0	7	0	10	1	0	0
ENSG00000288649	170487	ACTL10	434	511	245	141	224	139	338	233	283	415	201	281	317	65	293	139	195	151	403	132	121	84	318	319	358	177	268	302	596	391	428	151	147	211	165	303	102	431	705	286	112	367	259	326	131	86	387
ENSG00000136518	86	ACTL6A	4087	3669	5423	3649	5121	3934	5242	6872	3765	4001	5860	8290	5818	7608	3411	3624	6335	5571	8482	4461	4170	3781	7289	8330	4126	2651	5810	4034	4953	5326	2494	7698	5922	4062	4003	3669	5047	5553	4939	3667	3407	3427	7993	7750	6090	5341	6504
ENSG00000077080	51412	ACTL6B	0	0	0	0	0	0	0	0	0	0	0	0	0	0	0	0	2	1	2	0	0	0	0	0	0	0	0	0	1	0	0	0	0	0	2	0	0	0	0	0	0	0	0	0	0	1	0
ENSG00000187003	10881	ACTL7A	0	0	0	0	0	0	0	0	0	0	0	0	0	0	0	0	0	0	0	0	0	0	0	0	0	0	0	0	0	0	0	0	0	0	0	0	0	0	0	0	0	0	0	0	0	0	0
ENSG00000148156	10880	ACTL7B	0	0	4	1	0	0	1	0	0	0	0	0	0	3	0	1	0	1	0	0	1	2	2	1	1	3	0	0	1	0	5	0	0	0	1	0	0	1	2	0	0	2	2	0	1	1	0
ENSG00000117148	81569	ACTL8	6	1	38	0	30	14	13	33	3	2	349	46	10	18	39	38	0	11	10	226	309	35	1703	525	0	0	4	0	59	6	1	40	12	20	0	11	58	147	31	14	0	1	13	9	0	0	69
ENSG00000181786	284382	ACTL9	0	0	0	0	0	0	0	0	0	0	0	0	0	0	0	0	0	0	0	0	0	0	0	0	0	0	0	0	0	0	0	0	0	0	0	0	0	0	0	0	0	0	0	0	0	0	0
ENSG00000188493	284325	ACTMAP	158	163	142	147	137	95	139	66	191	164	77	81	190	113	71	91	84	107	101	46	99	70	93	121	196	167	130	180	64	94	86	124	107	69	86	51	133	92	133	64	157	128	171	102	159	247	88
ENSG00000072110	87	ACTN1	4402	4810	6679	6186	6936	3898	4891	3635	7395	7116	5835	6304	4682	5005	4901	3992	3468	5542	4324	5260	5521	3901	9933	7965	9601	7243	8616	6287	6537	7321	7692	5256	5174	7509	15308	8120	4548	13421	20390	4905	3617	6220	6918	7424	5436	5451	6228
ENSG00000077522	88	ACTN2	0	0	1	1	0	0	0	0	3	0	1	1	0	2	1	2	4	0	3	1	2	1	14	4	1	2	0	2	2	0	0	0	0	1	7	0	1	0	0	2	0	0	5	2	6	6	2
ENSG00000248746	89	ACTN3	1	1	4	0	3	2	1	9	3	4	1	3	2	11	3	0	11	3	2	0	8	16	1	2	1	4	2	0	5	3	3	9	5	0	5	0	3	2	1	4	3	2	4	1	14	16	3
ENSG00000130402	81	ACTN4	47048	45393	47895	52281	74728	37451	47414	37161	78992	89032	33640	72686	41796	47398	30314	30118	33800	58854	62186	23234	21766	23732	212784	111557	40942	37286	34357	31042	50150	87190	34182	49478	42208	117319	270262	98093	27563	54847	65457	75719	29198	35476	35519	34571	31152	29940	46951
ENSG00000131966	55860	ACTR10	4340	4371	2282	1770	2461	1455	1841	1255	1944	1625	1513	2072	1331	2202	1636	1889	1447	2005	2550	1003	1026	763	2210	2019	2354	1626	2982	1961	1977	2257	1553	1956	2179	1514	3660	1242	1946	2150	2638	1602	1260	1425	2112	1621	1726	1261	1920
ENSG00000138107	10121	ACTR1A	5801	7123	8950	3897	8429	4459	4875	5415	4101	4848	4541	5375	5416	5764	4859	4208	7050	7733	7675	3817	3627	3349	12543	8205	4733	3303	8684	6088	7699	7509	4728	5938	6548	8036	9884	9054	9538	7788	8645	6270	4744	4601	9641	7728	8273	6724	4173
ENSG00000115073	10120	ACTR1B	8409	7307	6542	4741	6049	3505	7034	3163	6314	6242	5950	6038	5223	5642	4857	6048	4448	4041	4332	3891	6044	4170	5520	5978	5081	3812	4948	4336	5112	5058	5360	5149	6477	7059	10719	5933	6269	7458	6658	6627	1675	4141	6357	5824	6429	5936	5721
ENSG00000138071	10097	ACTR2	7707	4981	12045	10756	11630	6947	9193	8381	7411	7291	7233	9851	7377	9369	8212	7055	7191	13750	14562	6276	8360	6759	9462	13590	5762	5480	8655	4848	6671	6831	4129	10241	11450	10058	18435	10441	5706	8549	8550	13010	6986	5484	8256	6983	7183	6006	10457
ENSG00000115091	10096	ACTR3	17004	16755	23812	19130	22814	12353	17591	17809	19998	19559	13006	19329	12927	28459	13436	14538	15307	26328	28775	13618	18591	18895	22160	25434	11008	9396	15390	8075	16302	19459	10004	25332	22119	16928	31710	17556	12672	26192	16699	20013	11731	8155	13502	12975	12845	10258	16981
ENSG00000133627	57180	ACTR3B	1085	1588	785	480	618	1720	1370	1123	1028	968	1347	1390	932	1428	1989	1056	1355	909	1690	1613	1255	1098	1685	1322	1611	1048	1971	1883	1505	1256	1565	1595	1753	1603	926	1139	790	1116	955	920	993	900	1821	1337	1741	1401	1325
ENSG00000106526	653857	ACTR3C	484	501	384	205	304	756	597	404	699	712	679	1912	377	675	1250	640	801	929	675	764	1081	592	784	640	389	463	573	556	844	576	199	598	664	1137	1545	1809	474	659	1185	922	628	665	588	506	446	520	1326
ENSG00000101442	79913	ACTR5	1007	1511	1253	533	893	1397	1079	1618	1387	1710	1607	1571	1441	1837	1386	956	1301	1761	2201	1004	779	1037	2768	2415	886	548	891	692	1858	2106	1209	2114	2509	1411	1250	1176	680	1781	1855	1464	1354	1848	1231	1136	916	796	1624
ENSG00000075089	64431	ACTR6	1381	1659	1802	3294	2324	1630	730	1698	1791	1716	1262	1521	1450	2380	1056	1122	1570	1157	1453	1501	1959	2037	1623	1709	1642	1040	1726	1290	1119	1521	1208	1590	2235	1660	2518	1086	1703	1917	2006	1325	2105	917	1761	1188	1697	1477	1775
ENSG00000113812	93973	ACTR8	1442	1817	1132	1810	924	2373	2174	1872	2548	2555	2974	4127	2560	1916	2183	1998	1139	1429	1504	1088	1401	1329	1869	1992	1368	951	1545	1197	1385	1701	1376	2961	3070	3553	3721	2955	3035	2427	3078	2889	2914	2164	1039	907	765	715	2662
ENSG00000123165	139741	ACTRT1	0	0	0	0	0	0	0	0	0	0	0	0	1	0	0	1	0	0	0	0	0	0	0	0	0	0	0	0	0	1	0	0	0	0	0	0	0	0	0	0	0	0	0	0	0	1	0
ENSG00000169717	140625	ACTRT2	0	0	0	0	0	0	0	0	0	0	0	0	0	0	0	0	0	0	0	0	0	0	0	0	0	0	0	0	0	0	0	0	0	0	0	0	2	0	0	0	0	0	0	0	0	0	0
ENSG00000184378	84517	ACTRT3	37	34	111	39	157	194	238	260	160	210	118	476	137	121	249	105	17	138	180	61	84	56	99	127	97	43	134	34	175	100	47	107	108	225	264	210	135	115	213	368	46	203	150	169	72	69	187
ENSG00000115170	90	ACVR1	632	678	537	320	349	385	309	336	437	495	411	488	431	467	599	464	1018	1095	842	295	430	368	546	367	354	353	417	314	488	477	450	484	730	551	485	732	420	821	820	654	655	486	644	439	529	555	428
ENSG00000135503	91	ACVR1B	2333	2391	1434	2718	1518	2015	2538	1453	5177	4912	1637	3496	3353	3829	2618	1695	1263	1658	1743	1520	1809	1675	2131	2095	2428	1069	1648	1243	2330	3172	1998	1666	1542	2982	2901	2374	4516	2106	3119	2902	2387	2740	2254	1423	1909	1763	2504
ENSG00000123612	130399	ACVR1C	66	40	143	610	220	83	472	535	106	304	133	110	409	797	124	139	134	92	132	29	14	17	384	77	968	1069	718	891	124	469	22	262	298	139	499	316	138	101	97	239	650	231	532	232	635	505	215
ENSG00000121989	92	ACVR2A	1796	2330	983	1085	1185	1124	679	740	1905	1681	748	1893	945	1158	756	1109	775	1088	1626	604	822	537	690	925	504	720	825	659	879	1017	654	1136	1683	1231	3720	763	987	1115	1022	1635	1521	948	869	768	726	949	1415
ENSG00000114739	93	ACVR2B	602	1017	473	1055	465	1110	1865	1179	5257	4197	1104	1275	1521	2240	1937	1842	1390	861	553	682	1185	1483	1258	1362	2608	2600	1376	2915	766	1201	1392	874	1015	956	1167	797	4488	480	644	1563	2123	1754	1181	631	813	1046	1134
ENSG00000139567	94	ACVRL1	846	205	347	1712	1623	568	160	80	1502	1389	143	1652	1831	1761	487	1131	88	16	44	148	266	124	212	531	1530	1653	395	730	83	82	21	280	212	666	1230	983	995	85	92	1220	1674	559	10	20	88	95	1402
ENSG00000243989	95	ACY1	646	575	1160	2264	1449	940	1024	655	775	950	1414	1620	1132	1019	1179	1036	734	631	754	789	1180	754	865	567	739	418	711	589	640	550	617	669	1575	1838	1461	1295	1157	1001	709	1306	1186	1134	562	548	479	409	1110
ENSG00000132744	91703	ACY3	484	347	149	240	245	334	208	38	47	55	253	648	428	146	297	376	39	61	133	159	331	139	120	173	164	23	80	64	766	234	88	366	702	220	74	243	196	267	251	261	235	167	325	312	266	352	104
ENSG00000119640	97	ACYP1	600	669	338	402	357	232	572	427	434	462	476	385	394	456	266	485	510	313	270	305	588	622	792	966	1112	799	1155	931	584	633	767	561	336	151	275	170	304	616	495	236	490	364	492	385	415	498	341
ENSG00000170634	98	ACYP2	728	538	101	135	159	440	357	96	235	239	307	358	335	270	295	507	270	399	449	194	226	172	184	247	193	186	193	187	226	281	163	348	464	737	941	723	415	193	366	611	257	296	208	184	251	255	368
ENSG00000060971	30	ACAA1	3592	3757	8680	7225	9906	5239	3744	11475	6533	5031	8065	9065	3964	9414	6539	6639	3306	6133	5190	4035	4034	3560	8355	7950	6618	3053	6534	4245	8775	11330	3425	8648	7798	11525	9157	10088	4109	5512	6308	10890	2739	2942	2806	3446	2435	1692	7591
ENSG00000167315	10449	ACAA2	5275	5156	10585	18328	14270	5061	9406	3509	9004	8841	13212	28240	3737	8898	9782	2680	1982	3985	2335	3680	3912	3945	8945	6118	8401	6628	6035	4155	7854	4721	7948	15436	15730	2002	7399	1148	2628	14800	14877	7679	7741	2868	5956	4221	3595	3524	6277
ENSG00000196839	100	ADA	10	129	1214	489	801	941	170	56	1814	1797	598	717	657	634	599	640	1902	1129	1146	1519	2062	2886	983	1728	239	42	99	167	214	896	439	986	1124	922	438	651	222	560	305	1144	483	804	573	243	566	479	219
ENSG00000093072	51816	ADA2	0	3	1	11	2	4	44	9	15	24	3	2	7	94	13	24	10	0	1	2	1	4	121	201	350	225	182	157	1	0	0	4	1	53	22	27	11	2	3	18	7	1	1	11	19	6	57
ENSG00000164113	132612	ADAD1	0	0	0	0	0	0	1	0	0	0	0	0	0	0	5	3	0	1	0	0	0	0	0	0	0	0	0	0	0	0	0	0	0	1	0	0	0	1	1	1	0	0	0	0	0	0	0
ENSG00000140955	161931	ADAD2	0	0	0	0	0	0	1	0	0	0	0	0	0	6	0	0	0	0	0	0	2	0	0	0	1	0	0	0	0	0	0	1	0	0	1	0	0	0	0	0	1	0	0	0	0	0	0
ENSG00000168803	161823	ADAL	431	486	708	215	450	388	508	710	455	385	578	653	213	932	420	956	544	485	927	240	236	150	696	660	263	110	327	231	388	399	198	469	537	498	483	362	360	401	324	549	290	440	973	648	834	872	499
ENSG00000137845	102	ADAM10	7141	5236	10489	9791	9656	3306	6872	5736	11387	9486	5240	7800	4356	9197	6429	9337	14680	10973	13590	6015	10186	8019	5050	4975	4448	5648	6793	4775	3250	2644	6840	9919	2361	6457	9503	6200	6514	6669	8802	7147	5019	6327	14405	10835	8448	12029	9220
ENSG00000073670	4185	ADAM11	2	7	7	6	11	4	9	19	41	36	39	30	18	44	81	43	156	96	204	32	28	53	20	17	119	23	25	52	8	14	39	46	26	2	10	0	13	9	6	10	10	13	38	19	29	38	16
ENSG00000148848	8038	ADAM12	0	0	1	3	0	0	1	0	0	2	1	1	6	2	3	6	0	0	3	0	1	1	2	0	0	1	0	1	0	0	0	0	0	0	1	0	1	0	1	3	0	95	0	0	0	1	0
ENSG00000143537	8751	ADAM15	12583	10610	10690	8496	11244	11899	6439	10272	6969	6933	10366	8982	7013	7126	7750	6558	18548	8384	16656	14355	18038	12737	27628	19324	8505	9808	11152	11011	12854	13374	10901	14402	14763	14744	9578	14598	8236	13597	10766	10404	8582	7547	16457	14006	11604	10076	10905
ENSG00000151694	6868	ADAM17	3888	4752	3064	3256	3047	2968	2729	3274	3578	3448	3973	4337	3092	4838	3254	3805	6820	6116	4745	4196	5655	8281	4466	6658	3252	3338	4162	2839	2801	4049	2837	5788	6366	3302	5428	3026	2753	2305	2773	4561	5547	4024	3879	3105	3467	3581	3442
ENSG00000168619	8749	ADAM18	0	0	0	0	0	0	0	0	0	0	3	3	1	5	0	0	0	0	5	0	0	0	0	0	0	0	0	0	2	1	0	0	0	0	1	0	4	2	0	0	1	0	2	1	0	1	0
ENSG00000135074	8728	ADAM19	0	10	928	282	681	1403	1555	390	569	1401	761	37	8	248	1450	228	12926	9181	3577	15	92	36	4097	1246	2345	5771	3647	966	865	1003	43	1120	583	759	1251	1510	47	5326	3564	1547	451	3894	1704	2527	1405	1628	292
ENSG00000104755	2515	ADAM2	1	0	1	9	0	1	0	1	0	0	0	0	0	20	0	0	0	0	0	6	10	0	0	0	1	3	0	0	0	0	0	0	0	0	0	0	1	0	0	0	0	0	0	0	0	0	1
ENSG00000134007	8748	ADAM20	18	34	9	22	12	5	7	16	28	12	13	26	20	9	23	72	20	14	16	5	19	17	17	11	24	172	8	20	21	27	23	25	19	10	28	30	22	19	15	11	115	16	24	7	17	38	14
ENSG00000139985	8747	ADAM21	4	2	21	14	8	34	8	7	8	12	8	73	1	14	5	17	4	3	4	11	31	37	16	4	14	5	20	19	0	3	3	0	6	4	13	4	3	3	3	33	1	4	19	10	45	42	4
ENSG00000008277	53616	ADAM22	227	112	170	330	206	218	884	237	193	231	153	361	73	449	182	314	376	751	1495	194	54	33	51	20	190	208	131	218	151	288	443	367	417	41	81	61	125	58	171	190	408	480	929	358	466	553	577
ENSG00000114948	8745	ADAM23	0	0	0	0	0	1	0	3	5	1	6	4	1	0	35	3	0	32	5	0	1	0	0	0	1	2	2	0	1	2	0	2	16	18	5	0	0	0	0	1	2	0	90	51	46	64	7
ENSG00000042980	10863	ADAM28	0	0	13	9	26	0	60	0	21	28	1	69	10	61	1	6	0	0	2	0	8	2	1	1	2	1	0	0	0	1	0	0	2	18	0	14	0	16	65	19	0	16	55	32	12	32	21
ENSG00000168594	11086	ADAM29	0	0	0	0	0	0	1	0	0	0	0	0	0	0	0	0	0	1	0	0	0	0	0	0	0	0	0	0	0	0	0	0	0	0	0	0	0	0	0	0	0	0	0	0	3	0	0
ENSG00000134249	11085	ADAM30	0	0	0	0	0	0	0	0	0	0	0	0	0	0	0	0	0	0	0	0	0	0	0	0	0	0	0	0	0	0	0	0	0	1	0	0	0	0	0	0	1	0	0	0	0	0	0
ENSG00000197140	203102	ADAM32	111	209	35	32	55	58	131	130	410	390	707	1191	143	130	155	293	521	214	699	78	102	62	204	102	83	70	38	163	179	57	109	71	52	683	787	377	5	226	241	334	137	247	254	129	175	223	537
ENSG00000149451	80332	ADAM33	0	0	0	0	0	0	0	0	1	0	1	0	0	1	2	0	0	0	1	0	0	3	0	2	1	0	2	0	0	0	0	0	1	0	0	0	0	0	0	1	0	2	0	0	0	0	0
ENSG00000069206	8756	ADAM7	0	0	0	0	0	0	0	0	0	0	0	0	1	0	0	0	0	0	0	0	0	0	0	0	0	0	0	0	0	0	0	0	0	0	0	0	0	0	0	0	0	0	0	0	0	0	0
ENSG00000151651	101	ADAM8	2890	1301	171	1107	394	141	46	78	411	373	94	39	180	26	36	81	187	115	106	699	5723	2435	484	199	161	216	62	179	77	333	319	66	61	944	568	2069	235	155	258	477	2180	226	188	274	150	510	9
ENSG00000168615	8754	ADAM9	3713	2832	15595	19037	15113	2428	7318	16455	8419	9782	9546	6732	7004	15496	7692	7688	8857	14908	6882	2618	3627	4737	8705	4359	7028	8801	8890	7015	15815	7243	2483	4256	4460	11234	22831	11788	3513	42479	16372	6924	12729	8499	5976	5699	3945	5488	7146
ENSG00000134028	27299	ADAMDEC1	0	0	1	17	0	0	0	0	1	0	0	0	0	0	0	0	0	0	0	0	0	0	0	0	0	0	0	0	0	0	0	0	0	0	0	2	0	2	0	0	0	0	0	0	0	0	0
ENSG00000154734	9510	ADAMTS1	14	0	0	0	0	3	1	10	2	0	2	3	4	16	20	14	0	0	0	3	6	2	0	3	1	0	2	25	1	1	0	0	0	29	7	1	7	0	3	11	4	0	3	1	7	15	8
ENSG00000142303	81794	ADAMTS10	0	0	0	0	1	0	0	0	2	15	6	7	118	0	0	11	5	0	2	19	142	28	0	0	13	4	2	93	0	0	0	0	0	9	26	2	7	1	0	0	3	0	3	3	11	21	2
ENSG00000151388	81792	ADAMTS12	0	2	0	0	5	1	4	1	0	4	4	1	2	0	13	1	0	21	45	0	1	0	0	0	5	0	1	0	0	1	45	0	0	10	6	4	5	0	1	5	10	1	1	0	0	0	1
ENSG00000160323	11093	ADAMTS13	238	207	31	93	68	164	178	38	175	151	114	181	315	160	208	414	176	96	91	136	385	232	62	84	632	369	115	390	42	77	447	69	139	89	172	42	121	71	123	89	347	226	117	58	68	138	155
ENSG00000138316	140766	ADAMTS14	13	424	9	0	20	81	77	0	22	23	132	70	13	15	24	41	25	22	3	21	18	17	2191	443	8	1	7	1	902	667	45	4	22	313	236	387	17	154	349	903	22	108	2	3	0	6	16
ENSG00000166106	170689	ADAMTS15	8	0	505	158	405	108	44	0	1	3	11	2	28	4	76	7	63	164	825	4	0	0	49	76	3	2	2	0	0	0	430	23	2	242	12	287	4	734	1098	0	92	4	92	93	56	31	0
ENSG00000145536	170690	ADAMTS16	0	1	0	0	0	0	0	0	0	0	2	11	3	0	2	0	5	3	0	0	0	7	0	1	0	0	0	0	0	2	0	1	0	2	5	1	2	0	0	9	1	0	0	1	0	7	1
ENSG00000140470	170691	ADAMTS17	180	148	4	5	7	243	142	112	405	368	698	362	45	50	240	420	2	7	0	69	131	51	592	436	212	50	27	214	78	100	9	359	87	1110	513	1371	351	74	80	736	444	97	1	0	2	1	191
ENSG00000140873	170692	ADAMTS18	32	6	0	0	0	1	6	0	4	2	0	0	5	18	2	1	0	0	3	36	60	2	1	0	1	0	1	0	1	1	4	0	0	17	1	7	10	1	17	2	0	5	1	0	0	0	2
ENSG00000145808	171019	ADAMTS19	463	338	0	0	0	233	1235	181	0	0	276	111	52	34	0	0	3	1	0	314	294	124	0	6	600	115	547	178	57	131	0	4	63	117	419	59	118	1	9	41	105	592	217	66	165	187	173
ENSG00000087116	9509	ADAMTS2	0	0	0	0	0	2	0	3	0	0	7	0	0	16	1	0	1	1	5	0	0	1	3	7	7	0	4	15	4	14	2	3	1	4	0	0	1	0	0	0	2	0	11	9	2	6	0
ENSG00000173157	80070	ADAMTS20	0	1	0	0	0	0	0	0	0	1	2	0	0	202	0	0	24	8	67	0	0	0	0	0	1	1	1	0	0	0	0	0	0	1	0	3	16	1	0	0	1	0	2	0	0	0	0
ENSG00000156140	9508	ADAMTS3	1	0	0	0	0	0	0	0	0	0	0	0	0	2	0	0	0	0	0	0	0	0	0	0	0	0	0	0	0	0	0	0	0	0	0	3	0	2	0	2	4	3	0	1	0	0	0
ENSG00000158859	9507	ADAMTS4	0	2	0	2	0	0	5	3	1	3	2	2	1	10	1	2	1	3	36	6	15	2	14	8	3	1	5	2	2	2	4	1	1	7	12	45	24	2	0	4	0	3	0	1	2	1	2
ENSG00000154736	11096	ADAMTS5	0	0	0	0	0	0	0	0	0	0	0	0	0	0	0	0	0	0	0	0	0	0	0	0	0	0	0	0	0	0	0	0	0	0	0	0	0	0	0	0	0	0	0	0	0	0	0
ENSG00000049192	11174	ADAMTS6	46	46	8	4	6	83	30	38	22	34	3	27	30	125	40	88	2	3	11	47	27	20	19	12	25	15	11	21	74	276	39	6	7	42	65	55	234	25	69	104	51	23	390	234	297	341	33
ENSG00000136378	11173	ADAMTS7	1	0	0	0	0	4	30	3	6	6	72	8	4	15	56	63	97	118	74	50	82	217	165	90	14	4	13	9	4	8	1	34	694	11	6	9	51	80	41	6	113	14	40	13	52	51	235
ENSG00000134917	11095	ADAMTS8	0	0	0	0	0	1	3	0	0	0	0	0	1	0	0	4	0	0	0	0	0	0	2	1	0	0	0	0	0	0	3	0	0	11	18	7	0	0	0	0	0	0	0	0	0	0	0
ENSG00000163638	56999	ADAMTS9	85	100	16	46	54	49	64	8	23	60	6	24	7	5	27	375	0	185	13	71	32	90	75	4	7	1	0	5	85	58	5	2	32	103	15	98	20	151	460	494	29	255	0	4	5	0	10
ENSG00000178031	92949	ADAMTSL1	6	12	0	2	1	0	6	0	9	15	2	41	25	2	21	302	0	0	9	4	1	0	2	2	46	22	18	11	3	0	21	55	185	169	241	25	3	1	0	9	2	15	1	1	0	4	34
ENSG00000197859	9719	ADAMTSL2	35	279	18	6	28	913	2431	13	1227	844	366	3250	126	764	1318	2893	68	90	123	42	78	68	137	98	27	5	13	60	37	94	22	57	161	848	2862	202	447	191	2175	625	130	215	2296	961	994	1959	2250
ENSG00000156218	57188	ADAMTSL3	0	0	0	0	0	0	0	1	0	0	0	2	0	0	0	1	0	0	0	0	0	0	0	0	0	0	0	0	0	0	0	0	0	0	0	0	0	0	0	1	1	0	0	0	0	1	0
ENSG00000143382	54507	ADAMTSL4	1	11	21	10	13	54	65	6	11	20	66	97	21	143	78	40	77	38	27	25	202	157	74	59	5	6	2	5	7	14	9	3	22	55	77	16	129	23	46	39	187	54	3	8	7	3	12
ENSG00000185761	339366	ADAMTSL5	242	192	217	197	200	307	68	119	214	250	218	244	201	299	49	79	692	875	629	273	308	230	176	122	57	46	56	61	240	238	426	122	327	234	596	194	231	161	170	335	223	65	50	64	30	63	208
ENSG00000105963	11033	ADAP1	11499	14835	7964	4109	6787	3389	3938	3998	3512	4080	2376	2249	3183	5318	2044	1506	3886	1862	3084	3440	3687	4254	6429	2687	3593	4016	3881	3519	3583	4307	5965	2964	2704	3393	2091	4477	2512	7915	5417	1954	3657	1517	6672	5668	4953	5813	1386
ENSG00000184060	55803	ADAP2	22	15	123	46	84	18	15	25	66	95	139	42	48	36	38	202	670	660	741	60	173	308	94	107	356	73	231	60	22	40	26	162	106	21	39	21	9	24	24	151	177	18	119	32	221	59	29
ENSG00000160710	103	ADAR	10443	11346	14597	10171	12710	11251	13849	8883	13573	13953	9186	10229	13123	14360	10510	12479	24659	10492	28695	13872	17776	15204	23793	17842	11777	10740	15100	13841	11173	11865	10443	14428	13116	15639	16780	12757	6539	14344	15101	9706	12148	13295	21233	17336	17048	14837	15038
ENSG00000197381	104	ADARB1	799	741	694	384	767	845	823	190	397	330	1210	661	215	611	405	778	1284	706	1174	585	627	550	2242	1362	747	615	1040	1815	760	636	886	1357	976	446	378	651	859	753	978	710	285	197	869	429	517	329	2155
ENSG00000185736	105	ADARB2	0	0	0	0	0	2	0	0	0	1	0	2	12	0	3	4	0	0	0	1	2	2	1	1	7	0	1	2	0	0	1	1	0	6	11	7	0	0	0	1	0	2	0	0	0	0	9
ENSG00000065457	23536	ADAT1	2423	2597	1876	925	1615	3376	2115	1982	1180	1422	2626	3752	1862	2357	1092	1078	2493	2052	3372	1553	1961	792	1518	1478	1841	1063	3018	1609	2690	2195	1820	2765	2679	1972	1826	2189	1908	3857	4406	1796	1820	1452	1583	2868	1245	1510	2889
ENSG00000189007	134637	ADAT2	1006	1183	798	626	540	1089	896	780	955	945	1006	1078	1009	1222	617	871	1756	1028	1532	767	907	707	1752	1702	1369	605	772	1279	776	711	1286	1090	1319	1036	879	968	986	644	574	1521	1693	1027	726	427	467	626	1388
ENSG00000213638	113179	ADAT3	218	135	123	57	74	62	177	76	191	202	68	102	238	156	181	202	72	161	266	75	105	65	158	116	156	124	300	130	203	255	105	156	102	109	134	107	88	151	202	107	96	257	87	81	33	20	176
ENSG00000063761	57143	ADCK1	712	908	339	200	383	714	684	551	487	515	793	802	370	606	573	494	294	444	702	881	642	444	609	621	898	330	1032	708	936	651	877	542	469	537	656	479	812	947	1140	682	469	429	811	678	552	546	1129
ENSG00000133597	90956	ADCK2	3005	3957	3070	2074	2208	1541	2995	3091	3319	3265	2178	2200	1882	2778	3331	2616	2192	2738	4445	3670	3030	2260	2119	2660	3912	2022	3536	1848	3489	3281	2805	3371	2620	2051	2042	1727	1634	3583	3243	1803	1584	1245	3971	2939	4389	3348	2656
ENSG00000173137	203054	ADCK5	2075	2373	1792	961	1379	705	638	842	877	702	1304	1832	1313	1162	681	1235	974	1534	1291	1936	2303	1588	1102	1269	2217	704	1238	1365	1652	1506	1701	945	1344	774	1158	692	1691	844	909	1548	624	540	736	511	526	468	3125
ENSG00000164742	107	ADCY1	43	11	0	0	0	14	105	2	61	54	86	217	25	16	138	354	0	2	0	248	146	217	54	32	83	4	30	92	148	28	0	23	33	16	81	59	4	89	109	20	26	49	1	0	0	0	77
ENSG00000143199	55811	ADCY10	13	6	1	20	3	7	7	12	8	10	2	2	24	34	5	10	10	7	14	6	27	27	21	7	11	26	3	11	5	17	6	17	5	1	3	17	21	6	7	2	64	10	21	5	20	18	5
ENSG00000078295	108	ADCY2	1	0	0	0	0	0	0	0	0	0	1	1	0	0	0	0	44	2	1	0	2	1	0	0	2	0	0	0	81	866	0	2	0	0	0	0	0	0	1	1	1	2	2	0	0	0	0
ENSG00000138031	109	ADCY3	2108	3243	4972	2549	2954	3088	2733	2099	1559	2351	6850	10858	3256	6226	8469	5692	6512	7662	11867	4003	3954	2967	3991	6896	3187	2828	2870	2668	4414	4228	5443	6811	6618	2937	3853	2769	2105	4145	2721	6585	4794	2657	5528	4311	4164	2782	4607
ENSG00000129467	196883	ADCY4	118	32	49	136	101	6	17	12	61	67	44	41	233	13	37	57	93	31	19	14	203	217	54	112	574	494	74	372	45	49	103	53	85	8	27	24	132	16	28	34	248	66	27	6	18	51	19
ENSG00000173175	111	ADCY5	0	0	0	14	0	10	127	18	6	3	6	1	10	15	2	8	6	11	7	1	3	0	6	6	52	68	15	113	2	2	0	4	2	8	11	18	280	0	1	7	9	8	13	5	4	14	65
ENSG00000174233	112	ADCY6	2660	2312	5108	11979	7387	3151	3869	5176	4794	4843	2612	4206	4765	6416	3548	3850	3720	4033	2698	4211	7013	4374	2934	4726	7414	5604	5344	5087	3416	3901	4287	2659	3820	3310	4853	2784	5743	3524	4657	4716	7950	3683	3785	2488	3114	2360	4964
ENSG00000121281	113	ADCY7	522	824	804	559	664	866	273	720	560	338	2136	2238	834	1487	1883	924	5459	4112	2959	1357	2995	2788	914	1125	1322	1535	1907	1137	255	507	139	1076	577	251	171	221	1034	660	501	620	1124	163	1878	2832	1648	2368	1325
ENSG00000155897	114	ADCY8	0	0	0	0	0	0	0	0	0	0	0	0	1	0	0	0	0	9	2	1	0	0	0	0	0	0	0	0	0	0	0	0	0	0	0	0	0	0	0	0	1	0	1	0	0	0	0
ENSG00000162104	115	ADCY9	218	239	1126	721	927	655	764	644	302	466	797	376	1379	659	1339	904	1173	1014	1173	809	1683	1141	1364	1398	738	312	217	482	666	724	92	1123	1427	268	177	386	669	1328	1398	767	1213	312	596	653	417	349	1830
ENSG00000141433	116	ADCYAP1	0	0	0	0	0	0	0	0	0	0	0	0	0	0	0	0	0	0	0	0	0	0	0	0	0	0	0	0	0	0	0	0	0	0	0	0	1	0	0	0	0	0	0	0	0	0	0
ENSG00000078549	117	ADCYAP1R1	0	0	0	0	0	0	0	0	0	0	0	0	0	0	0	0	1	0	0	0	1	0	0	2	1	0	0	0	0	1	0	1	0	0	0	0	0	0	0	0	2	0	0	0	0	0	1
ENSG00000087274	118	ADD1	9930	10841	9611	7510	10686	4718	8978	9590	6234	8186	3663	6723	6068	8148	4530	6439	5779	9972	10858	5681	6746	5289	9236	7348	7856	7654	11790	5392	8326	8365	5152	8136	8066	6827	8783	6880	4927	8636	9818	6945	5732	6733	10685	7680	8506	7423	9063
ENSG00000075340	119	ADD2	1	0	0	0	0	5	7	0	0	0	2	1	0	0	2	4	9	6	30	0	0	0	39	25	5	0	19	16	16	4	0	0	1	2	3	0	1	0	0	2	0	0	0	0	1	2	13
ENSG00000148700	120	ADD3	16603	14811	12928	20956	13474	8785	9868	14574	22669	19374	11285	23414	22115	18124	12086	10067	10868	24767	14975	9831	14860	11734	7272	11682	30252	20068	27625	24913	13543	13821	11052	9649	11858	37580	60212	21713	21142	11719	14323	20243	16331	11832	22485	14286	20263	20812	15463
ENSG00000118492	79747	ADGB	0	0	0	1	0	1	0	1	0	1	7	51	10	8	1	4	2	0	4	2	6	17	2	6	152	45	28	12	6	7	0	4	5	1	1	0	0	0	0	4	35	1	0	0	0	1	62
ENSG00000197177	84435	ADGRA1	0	0	0	0	0	0	0	1	0	0	0	1	0	0	0	0	0	1	0	0	0	0	4	2	3	1	0	0	0	0	0	0	0	1	2	0	0	0	0	1	0	0	0	0	0	0	0
ENSG00000020181	25960	ADGRA2	3	7	18	21	18	10	19	146	26	21	124	22	40	89	76	93	392	84	162	4	2	7	56	30	64	36	31	50	5	35	7	4	21	8	4	3	9	17	14	73	10	89	83	65	51	123	30
ENSG00000152990	166647	ADGRA3	134	725	4954	3875	3924	4734	6696	6794	3057	4073	2882	4522	3034	5207	3124	3420	5137	5049	7947	4195	5264	4230	6298	4661	5841	5124	7839	6711	4663	6024	3701	5322	6226	4105	3007	3713	4670	5396	6212	3654	5692	5979	5342	3315	3761	3245	10872
ENSG00000181790	575	ADGRB1	1	15	9	6	10	2	0	6	17	22	5	3	5	2	6	9	13	1	8	3	23	33	3	14	42	16	14	14	0	13	2	26	23	4	27	3	2	4	1	28	14	9	2	19	5	19	35
ENSG00000121753	576	ADGRB2	4	5	27	31	27	53	99	5	42	38	138	205	77	19	227	89	504	89	180	126	130	43	43	39	22	5	2	14	110	198	69	40	29	102	104	117	92	275	785	109	34	14	565	457	458	553	18
ENSG00000135298	577	ADGRB3	0	0	0	0	0	0	0	1	0	0	0	1	0	0	0	0	1	0	0	0	0	0	0	0	0	0	0	0	1	0	0	0	0	0	0	0	0	0	0	0	0	0	0	0	1	0	0
ENSG00000111452	283383	ADGRD1	154	80	1	7	3	72	46	15	10	40	36	104	128	605	132	38	7	7	7	8	19	25	80	832	17	15	8	22	21	8	16	115	32	485	361	230	23	0	0	12	52	3	4	6	0	4	19
ENSG00000180264	347088	ADGRD2	0	0	1	0	0	0	0	0	1	0	1	0	0	2	1	0	3	1	0	0	0	0	0	0	0	0	0	0	1	1	0	0	0	0	0	2	2	1	1	0	0	0	1	0	0	0	0
ENSG00000174837	2015	ADGRE1	0	0	0	0	0	0	0	0	10	11	3	47	3	1	0	1	4	0	4	30	0	7	7	47	0	0	0	0	0	0	2	0	1	1	0	3	1	0	0	2	0	0	0	0	0	3	0
ENSG00000127507	30817	ADGRE2	4	2	91	170	120	116	19	61	227	104	343	356	132	176	598	81	12	12	91	216	290	309	217	192	138	76	52	227	84	116	12	22	8	118	99	43	24	62	28	771	277	40	6	59	3	31	12
ENSG00000131355	84658	ADGRE3	1	0	0	0	1	1	0	1	0	1	1	0	0	0	0	0	0	0	0	0	0	2	0	0	0	0	0	0	0	0	0	0	0	0	0	8	0	0	0	0	0	0	0	0	0	0	0
ENSG00000123146	976	ADGRE5	6491	5435	5175	4284	4985	2653	4753	1711	4917	5793	2097	1856	3106	2729	3178	1547	2063	3198	5415	1871	2331	2614	8524	5018	2502	1687	1567	1824	3976	4440	4429	3668	2021	3675	6920	6064	2463	2828	3090	5038	2461	2965	2071	1203	1194	1072	1820
ENSG00000153292	266977	ADGRF1	491	360	790	740	1126	68	9	4	426	493	13	18	37	133	66	14	4125	3000	3994	51	155	290	56	62	78	321	191	35	61	4	47	33	4	269	206	147	6	512	1595	75	117	48	206	558	44	305	37
ENSG00000173567	165082	ADGRF3	59	29	8	8	10	8	29	12	13	21	27	137	49	158	32	40	19	45	35	52	49	18	4	39	24	8	17	18	26	7	28	26	48	65	41	49	216	19	29	50	19	22	11	5	16	18	48
ENSG00000153294	221393	ADGRF4	1849	1187	192	235	279	225	56	1190	1362	906	42	96	47	794	93	119	170	673	391	18	60	54	599	354	212	199	443	122	427	411	92	181	118	11	212	199	83	675	575	263	256	6	607	451	271	204	178
ENSG00000069122	221395	ADGRF5	0	0	0	0	0	0	0	1	0	0	0	0	0	0	1	0	0	7	1	0	0	0	0	2	0	0	0	0	0	0	0	1	0	0	0	0	0	0	0	0	1	0	1	0	0	0	18
ENSG00000205336	9289	ADGRG1	6349	10946	2683	2346	2166	7300	8013	3296	4456	4925	6185	5352	4816	2931	4649	3167	2145	5254	1628	2512	4689	2436	4813	3999	4359	1902	3748	3363	9446	10201	5656	3899	3895	8944	8821	12245	7526	13297	18356	6847	3634	6982	4427	5671	3201	5243	6318
ENSG00000173698	10149	ADGRG2	0	0	0	0	0	18	1	190	1	0	109	3	0	9	2	3	2	1	10	0	0	1	2	0	0	185	0	6	2	33	0	13	1	1	2	2	2	5	17	2	0	127	0	6	2	2	1
ENSG00000182885	222487	ADGRG3	0	0	0	0	1	0	0	1	0	1	2	0	2	1	3	1	0	1	0	3	2	1	1	0	1	1	0	1	0	0	0	2	1	0	1	4	4	2	1	2	2	0	0	1	0	1	0
ENSG00000156920	139378	ADGRG4	0	0	0	0	0	0	0	0	0	0	0	0	0	0	0	0	0	0	0	0	0	0	0	1	0	0	0	0	0	0	0	0	2	0	0	1	0	0	0	0	0	0	0	0	0	0	0
ENSG00000159618	221188	ADGRG5	107	65	308	135	103	31	41	25	70	51	132	46	420	224	290	274	564	219	302	63	98	101	139	179	265	99	131	120	51	265	30	94	141	11	3	5	222	58	73	20	149	236	563	552	352	271	261
ENSG00000112414	57211	ADGRG6	977	739	5416	4545	4285	534	139	3307	2033	3034	52	30	304	2918	102	123	5355	10956	11157	2076	2432	2704	1559	181	3607	2652	2384	3735	355	961	904	292	501	254	417	86	519	1002	1145	1576	675	670	1977	940	1680	2174	625
ENSG00000144820	84873	ADGRG7	972	105	406	200	351	91	227	37	22	24	15	141	58	1990	5	12	1	22	189	1354	594	106	4	11	27	13	2	4	160	318	644	47	51	56	48	87	428	261	411	79	23	13	79	95	69	67	280
ENSG00000072071	22859	ADGRL1	1044	556	1662	1825	1787	1762	1153	2818	435	724	2127	1433	3019	1535	3248	3395	2556	1476	2499	2823	3001	3024	2992	2325	1554	313	836	681	3016	3691	652	445	1990	1652	1888	1678	1999	959	786	1465	2056	2310	1646	801	1294	877	2936
ENSG00000117114	23266	ADGRL2	33	2	4	0	2	0	1	0	0	0	0	2	0	0	0	1	112	12	1086	6	11	4	0	1	0	110	42	780	2	0	0	0	0	2	21	0	5	0	5	0	2	2	936	36	56	240	386
ENSG00000150471	23284	ADGRL3	21	18	0	0	0	13	136	0	453	684	38	140	12	196	0	0	75	65	18	122	90	150	64	9	0	1	50	0	1	40	373	0	1	68	48	141	23	182	864	520	4	3	9	2	2	7	13
ENSG00000162618	64123	ADGRL4	0	2	1	0	1	90	0	0	0	2	0	0	0	1	0	0	0	3	0	0	0	0	0	0	0	0	2	0	0	0	0	0	0	0	0	0	5	0	0	0	0	0	8	2	0	7	3
ENSG00000164199	84059	ADGRV1	34	27	2	17	5	62	101	6	28	2	4	26	20	62	9	7	204	259	139	5	12	7	5	4	23	310	218	274	5	10	11	13	5	41	110	11	67	59	7	30	11	434	1916	554	1006	678	26
ENSG00000187758	124	ADH1A	0	0	2	0	0	0	0	0	0	0	0	0	0	0	0	0	0	0	0	1	0	0	0	0	0	0	0	0	0	0	0	0	0	0	0	0	0	0	0	0	0	0	0	0	0	0	0
ENSG00000196616	125	ADH1B	0	0	1	1	2	0	0	0	0	0	0	0	0	6	0	1	0	0	0	1	0	0	0	0	0	0	0	1	0	0	0	0	0	0	0	0	0	0	0	0	2	1	2	0	0	0	4
ENSG00000248144	126	ADH1C	6	3	2263	3844	5877	485	1	1410	65	228	51	469	245	6977	1115	779	0	9	360	1252	648	192	29	38	103	264	395	626	2	4	0	46	69	485	43	46	143	55	18	820	246	150	172	35	77	221	19168
ENSG00000198099	127	ADH4	29	0	3	0	4	0	1	7	0	0	0	1	16	274	0	0	0	1	2	5	15	1	1	1	3	0	2	1	0	0	0	2	0	15	5	8	4	2	4	1	23	0	0	0	1	2	39
ENSG00000197894	128	ADH5	3316	5625	10900	15344	12419	6364	7443	8482	7016	7931	7210	9212	9200	16109	8323	8048	8336	9076	9124	6982	11455	10371	7635	6936	9378	7516	12161	9436	5541	7249	6210	7791	10009	4387	6075	3472	8361	12810	12343	5271	10390	9738	9112	7154	8143	7992	11685
ENSG00000172955	130	ADH6	10	27	498	466	398	27	0	45	5	17	0	61	252	792	35	44	0	0	29	203	378	84	0	3	57	39	65	115	3	1	0	5	16	191	10	27	44	12	49	34	69	55	377	192	556	513	549
ENSG00000196344	131	ADH7	0	0	0	0	0	0	0	0	0	0	0	0	0	0	0	0	0	0	0	0	0	0	0	0	0	0	0	0	0	0	0	0	0	0	0	0	0	0	0	1	0	0	0	0	0	0	0
ENSG00000147576	137872	ADHFE1	18	11	2	1	0	0	2	12	2	1	2	4	5	2	3	7	4	3	8	3	4	7	11	7	12	7	4	6	13	32	9	2	1	1	1	5	13	1	2	7	14	5	8	11	15	12	27
ENSG00000182551	55256	ADI1	998	658	3145	1160	1929	1371	2424	1620	1526	1495	1419	2467	1258	2196	1378	1692	1343	1858	3349	773	1165	860	1706	1917	1313	825	2706	865	1403	1018	511	2133	1618	2296	3264	2395	1198	2695	3035	2216	1837	1722	2417	2534	2316	1446	4353
ENSG00000182035	149685	ADIG	0	0	1	0	0	2	0	2	3	2	0	3	3	2	2	1	1	0	0	0	2	4	1	1	2	4	0	1	0	1	2	0	3	13	1	3	1	0	2	2	7	4	1	0	4	4	3
ENSG00000181092	9370	ADIPOQ	0	0	0	0	0	0	0	0	0	0	0	0	0	0	0	0	0	2	3	0	0	0	0	1	0	0	0	0	0	0	0	3	3	1	0	0	0	0	0	0	2	0	0	0	0	0	0
ENSG00000159346	51094	ADIPOR1	6217	6453	7184	7938	7206	5945	6017	5442	7900	7519	4426	4301	5895	6340	5197	3926	12017	5690	14400	6088	10975	10803	13642	11106	7631	7697	8777	7287	4741	5410	5711	8463	7898	13379	16273	11230	4096	6673	6723	7269	8530	7636	8658	7432	8352	8102	5770
ENSG00000006831	79602	ADIPOR2	7305	5832	9529	17612	12394	4784	8721	7259	6789	7501	3977	5135	8559	8853	4025	5851	6387	11798	6269	10071	12194	10414	7960	12282	7281	6462	8993	4572	5884	5872	8374	8072	7954	5613	9234	5936	7069	9149	8785	8416	18807	4596	11502	8441	10034	8224	7956
ENSG00000148671	10974	ADIRF	8285	9573	3396	4713	2887	2234	3645	4573	950	1035	853	4910	2617	1014	1835	1948	17	9	4	1648	8032	8542	2385	2158	2379	6798	1523	918	2854	4282	4602	957	1734	2600	4767	4627	1695	574	658	22215	14150	2926	5199	4874	7894	7571	365
ENSG00000101220	54976	ADISSP	3399	3528	4028	1118	2361	3603	4170	2416	6508	6861	4114	3858	3294	9696	5899	4721	4289	4991	10676	6302	2937	3137	8933	8344	5020	3049	5050	5341	2924	2243	5090	4001	1937	4994	2446	3928	5479	1999	1166	2021	722	1446	6341	5529	5562	3660	5197
ENSG00000156110	132	ADK	2581	2933	2014	2246	2478	1811	3560	4606	1813	1873	1960	1913	1908	3171	1762	2040	2740	2820	4626	1649	1310	1281	5612	3525	3283	2912	3826	2937	3274	3168	1487	2817	2223	1814	2005	2207	2321	3212	2477	3205	2655	1921	5098	3720	3232	2235	2556
ENSG00000148926	133	ADM	673	279	963	1502	864	153	237	580	2476	1951	198	433	411	378	583	1068	484	2351	1722	238	600	427	1358	586	1453	1514	225	646	1369	961	1302	290	300	73	167	152	256	307	354	347	238	335	223	147	314	389	576
ENSG00000128165	79924	ADM2	1326	1634	228	448	229	334	59	442	155	113	341	49	274	75	53	250	562	705	286	572	944	840	140	214	379	444	688	213	278	560	329	381	266	103	246	73	404	127	90	190	643	64	97	36	125	205	489
ENSG00000224420	199800	ADM5	18	5	82	37	76	13	46	29	54	61	32	23	45	37	23	82	85	24	71	62	75	68	83	121	65	13	29	52	24	46	37	33	32	18	11	12	37	51	42	17	23	47	94	68	80	83	26
ENSG00000101126	23394	ADNP	4946	4223	4212	4334	3719	5046	6508	5133	7594	8585	3837	4816	6667	7613	7091	5556	3797	5147	5928	5113	7653	7300	6465	6587	5421	4601	4106	5011	7237	5361	3836	6664	8357	4452	4909	5349	5264	4574	6095	6284	8785	7758	7691	4463	5132	4772	5919
ENSG00000101544	22850	ADNP2	1258	3021	3724	2670	3491	2037	2585	1953	3465	3668	2214	2257	1417	2912	2107	1718	1449	1161	1940	1889	1875	1352	4217	2921	2587	2173	3075	2275	2911	2721	2699	3692	2512	848	1977	801	1615	3098	3395	1665	1486	2457	3811	2371	2979	2634	3298
ENSG00000181915	84890	ADO	3078	4023	1934	1697	1685	2303	2445	1724	2814	2798	2410	1871	3010	2299	11789	21836	3627	2888	4569	1856	2022	1790	3855	2599	3474	2423	4152	4429	3942	3885	3728	2685	2628	4938	9374	4100	3778	2849	3705	2516	1950	3118	4777	3563	3796	3607	2217
ENSG00000163485	134	ADORA1	0	0	3	48	5	13	2	1	11	27	7	15	2	20	17	4	10	17	73	2	0	1	78	39	2	0	0	0	1	0	0	0	0	12	6	3	19	69	23	4	7	231	6	6	2	3	6
ENSG00000128271	135	ADORA2A	15	19	3	6	5	2	7	8	17	11	7	0	13	16	8	9	11	10	6	4	14	14	12	15	15	25	8	15	13	9	10	9	13	10	12	15	9	11	5	7	20	1	14	5	14	19	11
ENSG00000170425	136	ADORA2B	1135	717	5210	6911	7423	2988	2378	2580	1911	3013	2774	1107	1322	2514	3839	797	3215	3845	1396	624	309	1261	5331	4304	2140	3704	2478	945	1815	595	3116	4919	5434	1835	1853	1957	1173	5674	6796	1911	2752	2164	837	741	843	751	3284
ENSG00000282608	140	ADORA3	0	3	3	3	0	0	0	2	0	1	1	0	2	0	0	0	0	0	0	1	4	0	2	1	1	2	0	0	0	0	0	3	0	0	0	0	0	0	2	0	0	5	0	0	0	1	2
ENSG00000159322	83440	ADPGK	2476	2314	4176	2414	3047	2306	3617	2648	3674	3708	2835	3434	2481	4905	2582	3660	3242	2842	4571	3316	3331	2815	5157	5774	3794	1471	5207	2572	2301	1693	2591	5237	3419	3151	2794	2593	2560	3027	2723	3290	4256	2864	7157	6329	5550	4379	4019
ENSG00000144843	141	ADPRH	0	13	23	9	15	222	188	102	190	277	194	325	147	188	275	127	120	112	304	139	118	74	263	284	45	33	58	35	40	65	4	292	163	528	909	637	57	38	102	677	26	165	274	291	156	136	168
ENSG00000153531	113622	ADPRHL1	778	647	183	127	232	230	667	120	283	322	395	514	689	266	174	640	129	190	98	416	928	338	542	582	606	439	486	570	364	624	630	582	424	346	433	376	369	167	213	363	338	267	647	415	450	602	119
ENSG00000170222	56985	ADPRM	701	543	452	434	458	528	296	179	526	364	349	300	403	317	218	376	541	221	479	288	627	852	346	338	602	296	303	474	174	174	340	282	345	350	300	240	403	182	268	349	729	356	293	151	222	383	199
ENSG00000116863	54936	ADPRS	2062	2356	2889	2258	3149	1604	1434	2144	1362	1351	1382	1322	1213	1735	808	1270	2296	3167	3578	2080	2976	2888	2839	2019	1219	1370	2377	1650	628	1153	1464	1533	1348	1735	1921	1684	1180	2249	2086	1778	1895	796	1453	1456	1098	1031	1257
ENSG00000120907	148	ADRA1A	0	0	0	0	0	0	0	1	0	0	0	0	0	0	0	0	0	0	0	0	0	1	0	0	1	0	1	0	0	1	0	0	0	0	0	0	0	0	0	0	0	2	1	0	0	0	0
ENSG00000170214	147	ADRA1B	2	2	0	2	0	3	0	3	98	49	5	3	0	4	3	108	0	0	1	5	9	0	20	6	2	0	0	0	0	2	0	1	3	0	27	10	3	5	3	169	41	0	0	0	0	0	1
ENSG00000171873	146	ADRA1D	56	160	0	0	0	12	2	0	1	1	1	2	12	9	13	6	27	5	27	3	3	3	24	3	14	19	6	9	15	3	45	2	1	20	150	21	4	1	3	6	3	11	14	10	3	3	0
ENSG00000150594	150	ADRA2A	212	113	429	106	588	18	5	0	158	58	28	483	38	3	8	96	0	4	2	29	25	1	1	21	26	39	35	4	5	4	156	15	22	39	474	37	2	292	87	385	147	6	34	48	9	22	281
ENSG00000274286	151	ADRA2B	7	0	10	7	4	3	15	5	8	10	44	54	55	12	36	115	139	50	43	38	138	106	29	39	32	8	5	7	5	25	21	12	11	6	5	5	4	14	33	7	20	40	8	5	21	34	7
ENSG00000184160	152	ADRA2C	3061	11248	87	57	156	962	2124	14	1454	1797	948	1395	1781	2040	2171	2550	0	0	0	36	35	17	995	1359	351	593	205	1266	388	7483	17	136	129	1543	3605	622	527	128	165	565	45	1673	1070	800	1085	1215	646
ENSG00000043591	153	ADRB1	418	170	2	18	4	80	17	18	375	285	136	74	172	47	63	116	277	493	661	135	177	278	65	188	15	10	49	30	82	20	106	69	131	11	3	5	242	78	99	9	243	61	152	71	149	204	108
ENSG00000169252	154	ADRB2	0	1	20	19	49	20	31	2	79	111	10	0	0	0	8	1	11	33	85	0	0	0	48	12	3	0	0	0	1	2	2	27	3	14	10	63	9	548	388	4	0	22	0	3	2	1	5
ENSG00000188778	155	ADRB3	0	0	0	0	0	0	0	0	0	0	0	0	3	0	0	0	0	3	0	0	0	0	7	0	0	0	0	0	0	0	0	1	0	0	0	0	0	0	0	0	0	0	0	0	0	0	0
ENSG00000130706	11047	ADRM1	8481	7616	9395	3980	7380	5411	6576	14031	6925	8932	8309	8850	6032	16531	9706	6470	5567	12785	14964	10081	9392	12045	14395	12245	7035	3855	8538	4749	14952	12313	5040	14111	11264	9857	8031	9310	5914	10601	8991	10744	5666	6775	8538	8952	7644	5516	13435
ENSG00000239900	158	ADSL	2033	3156	2752	1529	2242	1831	2877	2730	2445	2340	3029	3683	1228	4757	2103	1955	1512	2063	2224	2547	1644	1298	4334	3386	1624	1411	3476	3058	2385	2935	2340	2628	2484	2398	1943	1913	3317	3434	2818	1550	1314	2487	2394	1894	1429	982	3423
ENSG00000185100	122622	ADSS1	161	189	46	51	72	146	35	53	35	35	371	135	221	55	109	138	571	195	275	125	223	239	75	176	1184	1033	2475	1271	40	99	62	107	289	149	105	63	97	163	263	26	161	151	704	523	905	1202	45
ENSG00000035687	159	ADSS2	3539	3480	3563	2961	3595	2977	2545	2874	4874	4842	2458	3011	2366	4963	1973	2011	6490	2637	5905	1892	2264	1853	7133	5964	2896	3177	3902	4449	1871	1509	2432	3437	2566	3373	4255	2751	2735	3824	3354	2872	3080	3006	3818	3716	2671	2772	4736
ENSG00000111863	84830	ADTRP	111	15	27	252	77	31	217	36	8	2	9	17	67	24	2	27	138	22	20	85	183	24	17	21	28	40	100	22	1	11	3	46	27	131	364	263	36	108	121	12	77	9	142	83	232	341	221
ENSG00000106624	165	AEBP1	2	5	0	0	2	6	9	1	3	3	3	0	2	72	8	1	14	6	61	6	9	9	23	17	11	6	3	9	5	1	0	2	1	0	0	2	0	0	0	6	1	9	2	7	6	3	0
ENSG00000139154	121536	AEBP2	770	805	881	1788	1016	838	1917	778	1479	1454	867	875	1418	1883	888	1014	1650	1916	1663	1989	2870	2413	1046	1333	1499	1466	1671	1412	988	1309	788	1108	1250	784	627	626	1607	1337	1587	854	1953	1310	2070	1283	1553	1479	1588
ENSG00000181026	64782	AEN	5170	6356	7941	2099	4851	2291	7589	2299	3167	3689	2182	2141	1677	5086	2628	2849	1774	2709	4525	3228	2517	2037	5591	5787	2257	669	3338	1100	6974	5749	4764	5259	3343	4635	2900	4267	3149	6503	7152	5344	3295	4536	6246	5975	5645	4214	3985
ENSG00000196526	60312	AFAP1	3349	3624	2305	3810	3264	1555	2746	5055	5205	6875	1653	5000	2497	4536	2047	4091	2790	2680	2077	2310	3597	3739	3944	3659	1777	2551	4213	1812	3353	3381	1631	2834	2771	2061	4260	2411	1638	2668	3019	1866	3422	2114	513	384	671	518	4861
ENSG00000157510	134265	AFAP1L1	0	0	1	2	0	1	7	1	0	1	13	2	7	100	216	29	64	49	58	6	12	2	88	85	2	0	0	2	34	18	25	6	7	291	682	308	519	104	101	143	13	26	0	0	0	0	10
ENSG00000169129	84632	AFAP1L2	685	180	1403	1165	2192	41	232	6	1206	1715	190	163	131	83	132	102	589	797	205	32	50	12	343	288	224	54	69	172	95	476	120	50	54	1667	7412	1729	87	115	339	371	132	31	507	576	485	619	51
ENSG00000130396	4301	AFDN	12623	8247	11360	12130	9426	9561	12902	8942	14560	14313	10873	9713	18008	11781	6616	8418	11494	11940	9422	11857	18704	16565	18348	17218	10588	6817	8408	6917	12433	13269	9495	14218	15260	10107	17800	11920	11912	8464	9484	11561	20586	12682	7352	3837	5805	5508	11524
ENSG00000172493	4299	AFF1	1462	1324	1677	3134	2184	1749	2275	1857	2212	2664	1221	2029	1430	1805	2167	2413	1637	3092	1638	1081	1497	1308	1961	1959	4534	4410	2716	2711	1826	1965	1168	1607	2259	1266	2558	1584	2085	1683	2443	2611	3796	1976	3336	1573	2631	2950	4110
ENSG00000155966	2334	AFF2	2	0	0	0	0	0	0	0	0	0	0	1	0	2	6	1	0	0	0	0	0	0	0	0	0	0	0	0	0	0	0	0	0	11	7	2	0	0	0	1	0	0	0	1	2	1	5
ENSG00000144218	3899	AFF3	0	0	0	1	0	1	12	0	0	0	0	0	7	0	54	58	0	0	1	0	4	2	0	1	0	0	0	0	0	0	0	0	1	26	185	12	5	0	3	63	1	0	0	0	0	0	0
ENSG00000072364	27125	AFF4	5340	5135	5740	7954	8300	7150	5856	4811	5680	5570	3166	4717	7763	5886	4499	4947	9925	10650	9040	6440	12333	10457	7068	5218	6577	6660	5138	5701	5332	5924	3758	4206	6409	7458	10495	7588	5864	7923	8730	7012	13604	6824	7945	4168	6035	6045	4809
ENSG00000135537	246269	AFG1L	1042	543	409	307	331	540	477	488	425	391	390	545	428	518	442	434	318	348	347	472	636	521	853	614	411	218	265	240	484	473	318	519	743	306	567	434	585	429	442	536	662	232	265	214	269	275	529
ENSG00000145375	166378	AFG2A	1197	1394	2371	1297	1837	988	2160	1110	1106	1536	555	1175	1137	1547	1133	1226	1335	1182	1719	899	716	947	2785	1933	1534	1022	2132	1471	1564	2009	415	1404	1256	752	791	949	1016	2252	1941	835	874	1465	3058	2239	2548	2162	2260
ENSG00000171763	79029	AFG2B	1127	814	1636	1280	1223	601	1114	1279	984	960	920	901	831	1896	888	1470	931	830	1042	1118	1620	1582	1325	1422	868	452	1059	705	1346	1127	996	1966	1108	562	536	454	1132	1312	1181	1469	613	964	1882	1423	1478	1165	1563
ENSG00000141385	10939	AFG3L2	6056	7178	13511	9391	10928	5404	5829	5923	6992	6649	7450	7271	2710	7881	6438	8452	19896	14297	30490	9429	9724	7939	13116	9071	7100	4477	8129	4811	5516	4356	10060	8885	7580	4762	7072	5788	7038	10151	8072	6586	6187	3626	11408	8104	8803	6564	6581
ENSG00000079557	173	AFM	0	0	1	0	0	0	0	0	0	2	0	4	0	10	0	0	0	0	1	0	1	0	0	1	0	1	1	0	0	0	0	0	0	9	1	2	0	0	0	0	0	0	1	1	0	0	0
ENSG00000183077	125061	AFMID	1096	1288	1063	905	1118	1143	2013	1184	1702	2445	1285	1188	2431	2210	785	1282	1521	1434	1299	951	2619	1924	1826	1407	2346	1070	1994	2521	613	1061	3871	1465	1198	1895	1684	1592	1551	1066	1473	1897	1641	1736	1875	1912	1255	1622	1223
ENSG00000081051	174	AFP	11	33	0	0	0	0	0	1	19	25	0	17	3	290	0	10	0	3	9	4	2	0	4	4	7	2	8	1	0	4	8	1	1	9	2	13	0	0	0	15	7	1	7	4	6	1	14
ENSG00000119844	54812	AFTPH	6043	5623	6686	6651	6497	4994	4748	4923	6797	6255	4910	6831	5774	5488	5057	5400	6239	7619	9921	4521	6580	6261	5465	7563	4754	3938	5884	3792	4249	5199	3247	7278	6487	6573	10331	6785	3679	4461	5543	6739	4180	4807	4777	4243	4676	4197	6744
ENSG00000038002	175	AGA	2080	1589	1056	1326	1127	1032	1195	858	520	787	488	1509	1225	611	543	708	949	1148	898	843	910	501	451	676	323	621	1026	782	716	362	186	1533	1968	892	1159	983	1347	1218	2117	280	674	879	873	928	785	841	664
ENSG00000157985	116987	AGAP1	2921	3437	4051	4381	4212	2977	2374	4307	5016	5281	3508	3809	3708	3919	2616	3763	3234	5099	3754	3358	5146	4920	4467	3923	6503	4398	4270	3362	2535	3521	2220	4992	3598	876	836	1247	3221	3897	3446	3481	3990	3043	3224	3192	2437	2097	4798
ENSG00000135439	116986	AGAP2	15	45	40	51	45	10	38	179	105	72	130	127	14	78	128	10	22	26	14	23	12	1	99	246	554	300	1048	159	2	22	465	60	14	74	51	63	159	20	26	96	44	6	119	503	72	78	280
ENSG00000133612	116988	AGAP3	5276	6524	4529	2840	3313	4946	3633	3259	4532	3776	3728	3674	3360	3529	5054	4550	8443	5245	7783	5302	6971	6593	5719	4924	6055	4401	5734	5309	6624	6138	5953	5395	6076	6306	5313	4855	3322	3134	3399	4945	5931	3606	3960	3666	4001	4119	4871
ENSG00000188234	119016	AGAP4	151	195	104	107	120	110	87	121	134	144	117	95	273	132	90	112	248	138	165	5	12	16	215	164	206	179	135	253	98	144	229	129	160	161	187	195	193	117	124	147	205	171	132	72	146	123	101
ENSG00000172650	729092	AGAP5	19	26	18	15	17	6	18	8	22	22	14	7	25	10	5	16	29	19	15	7	17	7	38	19	17	29	22	39	6	9	22	24	11	14	8	18	34	21	17	14	32	18	16	15	7	29	6
ENSG00000204149	414189	AGAP6	43	79	69	25	42	44	66	53	67	76	37	37	70	52	43	66	131	107	113	68	89	71	156	106	43	48	64	78	51	73	53	103	73	93	104	161	61	95	80	94	131	41	90	66	118	70	75
ENSG00000204172	642517	AGAP9	157	213	128	136	133	28	170	77	144	150	117	116	180	149	82	135	156	147	71	76	126	72	249	137	105	102	74	113	74	127	131	109	93	103	126	174	187	27	21	12	176	5	312	192	267	286	75
ENSG00000273540	123624	AGBL1	0	0	1	0	1	25	0	2	7	2	13	83	5	11	5	0	16	8	19	1	1	0	5	5	2	2	6	0	0	2	1	2	0	4	5	6	28	2	0	3	1	1	5	1	0	0	3
ENSG00000165923	79841	AGBL2	6	30	18	30	24	58	13	64	62	59	38	80	100	76	15	88	54	99	24	48	62	97	13	33	78	65	45	93	19	16	63	38	49	23	26	23	66	25	51	31	53	29	24	16	16	22	30
ENSG00000146856	340351	AGBL3	51	61	99	45	58	51	92	42	119	125	66	63	99	127	70	85	98	100	136	54	59	53	61	51	166	57	128	134	76	98	109	72	70	103	101	101	72	99	129	44	36	48	203	107	216	172	38
ENSG00000186094	84871	AGBL4	0	0	6	6	22	1	5	2	0	0	12	15	9	9	0	0	1	2	5	42	42	34	10	12	0	0	0	0	4	3	0	0	0	0	0	1	2	8	13	2	1	0	20	11	28	23	0
ENSG00000084693	60509	AGBL5	2200	3210	2155	1367	1685	3764	3288	3479	3620	3439	4832	4352	3804	4267	2298	3446	2440	4399	2697	3763	4285	4248	1909	3166	2734	1538	3451	2187	1668	2415	2392	3477	5340	3590	4798	2202	2762	1325	1679	2898	2239	2201	3421	2983	3731	3515	2534
ENSG00000204305	177	AGER	16	17	22	25	15	12	10	11	10	11	14	14	11	8	6	31	31	4	10	9	51	30	19	24	17	6	10	27	19	23	19	9	25	4	9	1	7	25	7	7	20	13	9	4	6	4	10
ENSG00000173744	3267	AGFG1	3815	4239	8078	6991	6603	3939	4297	6047	7982	8015	4449	6752	6937	9236	6277	7386	5384	6340	6576	5077	7985	7141	5397	6928	6791	6600	6490	4624	5059	4224	3117	7274	6781	7041	13445	6588	4547	8120	5042	5090	5150	4689	5822	5505	5817	5343	8600
ENSG00000106351	3268	AGFG2	2930	1780	1925	1690	2389	905	913	5828	754	1001	960	1181	1724	1468	1544	880	1324	1093	1591	1593	4069	2255	1586	1578	2108	2057	1423	1843	1372	1557	731	1330	1564	1838	1376	1942	473	3066	2834	1443	2334	2157	2003	1646	1926	2079	2446
ENSG00000164252	55109	AGGF1	1158	1834	1624	1302	1709	1523	1214	1361	1689	1839	1054	1615	1105	1363	846	1226	940	1061	1327	1277	1733	1041	1408	1308	1730	828	1449	1592	1259	1482	1460	1465	2891	1330	1749	1103	1352	2021	1842	1755	1586	1368	2254	1513	1568	1604	1247
ENSG00000006530	55750	AGK	1525	2119	599	550	620	1879	1561	1269	1629	1519	1713	1496	1277	2202	1669	1627	1701	1203	2239	1538	1294	1041	1742	1596	1828	967	2108	1538	1775	1809	1861	1880	1356	2827	2087	1989	1385	2125	1913	1334	1001	1187	2801	1836	2510	2107	2052
ENSG00000162688	178	AGL	3070	2768	3231	3183	3466	2838	2465	3490	2502	2598	2233	3555	1495	3650	2916	2733	2366	3647	3620	1643	1513	990	1553	1683	2501	2422	4542	2604	2282	2481	1796	2085	2556	2733	3629	2685	2727	3181	3622	3735	4182	2476	2943	1828	1879	1582	4478
ENSG00000116771	79814	AGMAT	2675	2738	3565	2310	3084	2642	1952	4379	1441	1774	2189	3473	2370	4605	1759	2050	1308	1791	5155	4065	4100	3832	2038	3079	3361	1728	3859	2047	2742	2118	3514	3493	3074	1640	710	1121	1431	1442	1502	2974	1874	1349	2717	2372	1933	1555	7174
ENSG00000187546	392636	AGMO	157	28	213	309	334	35	1380	33	388	759	83	49	96	513	18	0	74	28	795	674	1536	740	0	3	74	129	111	22	3	97	10	7	8	240	19	73	24	357	368	49	17	290	490	494	395	606	323
ENSG00000092847	26523	AGO1	1598	2003	2146	1752	1891	1412	1848	2228	1962	2057	1598	2333	1326	2599	1198	1927	3044	3691	4106	1993	1733	1080	5192	4775	1180	1357	2642	1897	591	948	1267	1968	1957	1998	2734	2304	1586	2844	3054	2340	2761	1133	2227	1653	1401	1039	1789
ENSG00000123908	27161	AGO2	8549	7607	6801	4604	5154	3683	5277	7438	4875	5046	3774	3732	5712	6326	3630	5393	8662	14416	9834	9296	14265	12546	6291	7213	9799	9358	9691	8421	9525	7448	7717	5774	5630	2287	3247	2780	10327	3657	3694	6424	5916	4197	3920	2885	2364	2212	14067
ENSG00000126070	192669	AGO3	2041	2264	859	1261	898	1461	1221	2046	1279	1420	1363	1324	1401	1557	1075	1466	2129	2004	1846	1936	2747	2625	2073	1787	1090	1844	2187	2016	477	897	1418	1866	1652	1604	1948	1704	1279	1509	1860	1533	3644	1028	1872	1234	1348	1445	1054
ENSG00000134698	192670	AGO4	1443	2261	797	1689	1127	1027	554	765	1304	1113	1214	1309	873	837	834	993	1368	1066	968	1200	2335	2110	1519	1368	976	982	952	961	359	1079	637	870	1286	1163	3193	1101	685	618	1084	1320	1327	433	746	353	607	774	426
ENSG00000204310	10554	AGPAT1	371	582	635	166	389	856	750	818	609	592	630	596	645	612	582	627	856	918	1576	657	756	618	859	573	454	267	764	692	404	494	699	679	1133	990	1388	937	840	840	821	743	526	526	491	408	426	468	526
ENSG00000169692	10555	AGPAT2	9620	9466	6484	7977	10264	3469	4297	3146	5395	5168	3909	3495	4843	9938	4532	4826	7104	6434	10013	3398	4458	5130	5388	6711	9191	7967	4430	4640	3581	3811	9136	6204	7119	2778	2852	3267	3361	6659	4396	3653	6751	5657	13289	10240	10515	8100	1686
ENSG00000160216	56894	AGPAT3	5660	5575	5035	3924	4333	3122	3250	3077	2889	2764	4808	4085	3203	3340	4434	7631	3062	4609	4779	4908	6365	4940	6170	6853	4939	3747	5247	3610	5064	5068	5484	4343	6610	6947	7241	7503	3819	5819	5896	7588	2716	3082	4487	3571	3485	2708	4414
ENSG00000026652	56895	AGPAT4	46	6	421	478	876	93	18	63	15	12	18	5	8	62	10	3	23	1	4	42	31	10	85	42	7	1	4	3	7	59	9	11	6	10	32	6	153	19	37	61	11	415	69	61	167	153	5
ENSG00000155189	55326	AGPAT5	1480	1427	6316	6688	5444	1949	5434	2715	5033	4971	2133	4834	3050	5074	1330	2233	2428	3437	4364	2202	2181	1570	5018	4995	4699	4193	6171	4932	6089	4482	2196	3692	3921	1861	1599	1673	2594	3191	5276	1824	2815	4596	3965	3809	2426	2271	4571
ENSG00000018510	8540	AGPS	5039	3822	9547	7719	7406	4615	3304	7943	4124	4330	6095	7383	3268	7783	4111	3770	4703	7958	8081	4097	3026	1989	6032	5707	3634	2801	6725	3715	5296	7626	2477	8261	5861	6176	8367	5734	4755	10254	8284	4798	5198	3472	7208	6516	5768	3947	7765
ENSG00000106541	10551	AGR2	341069	128989	100698	127049	134189	20162	20297	29845	5162	11226	5341	4940	35810	53617	4812	1611	4523	17930	22492	22207	51499	61584	2994	2103	44219	31151	46744	41929	16352	20186	43596	30898	10773	5859	1060	4316	26646	36195	35547	3621	13475	3250	57645	31053	42082	37432	48005
ENSG00000173467	155465	AGR3	9258	5456	6660	6250	6622	133	196	164	96	92	19	42	529	1120	11	22	702	291	1333	402	3400	817	0	25	1471	3258	2465	3517	28	26	2546	35	14	141	13	80	305	1570	1412	30	137	14	3772	1153	3897	3483	846
ENSG00000188157	375790	AGRN	19807	18691	21710	11958	19501	10641	8986	5470	12792	8476	17696	25431	11831	12029	7233	12958	17604	23505	25658	8373	11569	10249	13053	8059	8154	10732	10095	7462	13895	20619	9039	8289	15687	33260	30824	25676	9474	24950	34062	16092	7601	11617	17120	12865	13165	21383	10377
ENSG00000159723	181	AGRP	0	0	0	0	0	0	0	0	0	0	0	0	0	0	0	0	0	0	0	0	0	0	0	1	0	0	0	0	0	0	0	0	0	0	0	0	1	0	0	0	0	0	0	0	0	0	0
ENSG00000135744	183	AGT	353	289	3	2	2	104	368	517	1062	870	1862	1028	402	6338	125	29	144	141	198	19	48	13	54	151	476	51	87	295	72	184	71	318	81	60	18	63	332	4	23	1864	247	135	5	10	3	6	115
ENSG00000135049	23287	AGTPBP1	4066	8920	2061	1768	1788	3836	2421	1434	1791	1398	2913	2885	2686	3694	2908	5629	3401	3290	6392	2933	2783	2338	3012	2960	3547	1763	4567	4085	2599	2402	3193	4806	4315	3062	3678	2218	3456	1936	1909	1488	3893	4194	3299	1427	2164	1786	2897
ENSG00000144891	185	AGTR1	0	0	0	0	0	22	0	0	0	0	0	34	61	9	55	4	10	68	14	2	3	2	1	0	28	23	14	125	1	1	0	0	0	14	493	0	0	0	0	0	4	2	0	0	0	0	0
ENSG00000180772	186	AGTR2	0	0	0	0	0	0	0	0	0	0	0	0	0	10	0	0	1	1	4	3	0	2	0	0	0	0	0	0	1	0	0	0	0	0	0	0	0	0	2	1	1	0	0	0	0	0	7
ENSG00000177674	57085	AGTRAP	705	1207	1693	1007	1256	1502	386	1544	1089	1048	1577	1306	1127	1697	1008	1162	1920	3084	2609	1387	1523	1189	1183	1717	1507	670	1542	896	940	1355	1162	2336	1949	1167	2174	1058	719	1636	1320	1236	701	620	1430	1155	1365	1016	2458
ENSG00000172482	189	AGXT	220	368	12	14	25	611	107	65	28	45	224	757	244	57	223	148	28	28	34	79	242	174	1	42	216	101	118	736	61	66	253	140	76	1310	154	1140	43	6	40	263	195	194	43	157	67	104	149
ENSG00000113492	64902	AGXT2	0	0	0	1	0	0	0	0	0	2	0	0	2	2	0	0	0	0	1	4	58	4	0	0	1	1	0	0	1	0	0	0	0	0	0	0	1	0	0	0	12	0	5	0	0	4	4
ENSG00000153207	25909	AHCTF1	6493	5938	7246	5385	6016	5413	6467	6608	7964	8588	5603	5042	6392	10496	5401	4183	14320	5957	17566	5033	5277	5432	19473	13623	7235	7632	10123	9852	4952	3484	5255	9626	8383	7307	7008	6228	4873	6328	7100	5548	10857	4930	10674	7778	7734	6910	9409
ENSG00000101444	191	AHCY	19451	20035	23658	9975	17445	36801	29315	33813	28949	30079	27880	19017	21355	54382	25541	23495	15736	18240	28702	28855	27610	34152	34467	39720	31895	20055	23289	34292	28565	31815	28382	38172	38977	30996	13766	22350	28735	24908	19717	40665	16408	36625	25819	16615	20123	17830	31111
ENSG00000168710	10768	AHCYL1	9137	9275	3232	4850	3978	5856	3886	6866	5598	5572	5381	5941	5325	7208	3690	5346	6414	7071	7335	5342	7081	6461	6910	6000	7675	7894	9669	7029	3891	5984	5453	9588	8102	6691	7352	4957	5985	4770	5689	6870	14757	5598	3725	2423	2398	2860	5631
ENSG00000158467	23382	AHCYL2	3771	2627	4940	8464	7101	1672	1152	3005	1468	1283	1137	978	912	1052	1630	1413	1514	1170	2102	1391	1645	1144	2013	2046	1588	3002	3301	1081	1879	1658	1028	1618	3845	2434	3250	2187	890	1924	2134	1615	8257	258	1422	882	1620	1377	8248
ENSG00000126705	27245	AHDC1	100	65	374	401	293	165	140	298	185	109	213	186	299	171	184	215	424	961	364	170	250	149	455	291	262	297	228	227	97	146	161	159	331	196	143	233	168	272	361	152	381	115	245	214	164	209	184
ENSG00000135541	54806	AHI1	2438	2127	1591	1479	1551	1707	1338	1643	1848	1927	2190	1966	1515	2189	731	826	3946	2522	2448	1044	1437	1340	2807	2926	2533	1701	1797	2177	1263	1519	1597	1771	1758	1234	1927	1375	1561	1311	1628	1516	3452	1619	1020	551	770	984	2624
ENSG00000124942	79026	AHNAK	28392	29339	61040	126667	91863	8582	12015	36537	53641	44478	16935	26028	24273	21880	6149	11866	29189	80239	45113	8067	24700	21031	31365	27039	27740	49732	25127	14058	11944	9286	18344	15960	8975	12591	29894	24032	4358	30950	38773	44956	24939	22693	19855	14044	13110	13861	4752
ENSG00000185567	113146	AHNAK2	1036	4080	1241	190	308	468	1168	104	49	23	735	389	161	53	192	395	1884	1389	2218	195	370	508	6583	979	759	424	167	290	1774	2047	826	694	201	306	2975	938	2679	8641	12710	822	516	857	4570	2529	3127	3793	78
ENSG00000106546	196	AHR	9190	6381	4592	4398	4244	2829	1502	2454	3004	3281	2434	6141	2870	4505	5399	4170	10937	7649	4936	4834	5764	9121	2553	2239	1875	2628	3825	2102	6426	5246	3642	3461	2114	2019	2165	1663	2843	5133	6136	2383	2271	1044	4469	2496	4045	3040	4996
ENSG00000063438	57491	AHRR	30	72	21	4	12	20	35	38	64	112	114	67	34	16	91	23	119	70	60	18	17	18	56	31	11	36	21	81	24	53	11	25	21	17	27	38	32	106	106	15	37	7	55	34	11	18	18
ENSG00000100591	10598	AHSA1	7553	6244	8305	4900	6542	4325	6960	6387	5041	4648	5037	6374	4759	8483	4879	4804	5409	6611	8501	6821	7257	6175	7569	8904	10609	9207	12854	9299	11476	7574	6360	8067	4407	4710	6195	3458	6495	11518	8800	5403	4646	4438	7348	7424	5916	4925	12303
ENSG00000145192	197	AHSG	1	8	17	6	8	8	0	0	2	10	1	12	23	80	1	2	7	18	12	17	12	13	0	1	14	0	11	3	1	0	0	5	2	3	3	2	0	2	1	1	3	4	8	17	19	5	12
ENSG00000169877	51327	AHSP	1	1	0	0	0	0	0	0	0	0	0	0	0	0	0	0	0	0	0	0	1	0	1	0	1	0	0	0	0	0	0	0	0	0	0	0	0	0	0	2	0	0	0	0	0	0	0
ENSG00000111732	57379	AICDA	0	0	0	0	0	0	0	0	0	0	0	0	1	1	0	0	0	0	0	0	2	0	0	0	0	0	0	0	0	0	0	0	0	0	0	0	0	0	0	0	0	0	0	0	0	0	1
ENSG00000186063	64853	AIDA	1008	1654	1451	1178	1212	1310	1284	1111	1578	1437	946	823	1083	1218	1071	633	2029	1210	3001	632	699	588	3947	2460	989	1344	1282	1219	897	727	996	1626	1574	1828	2713	1672	739	1434	1625	1202	1300	1392	2423	2037	1913	1831	1242
ENSG00000204472	199	AIF1	0	0	2	3	1	0	2	2	0	0	0	0	7	1	0	0	0	0	6	3	4	0	0	0	0	0	1	0	0	0	0	3	2	0	0	1	1	0	0	0	0	0	0	0	0	0	8
ENSG00000126878	83543	AIF1L	80	164	325	382	438	353	203	159	45	29	875	732	258	608	1935	2634	3850	1749	2842	1455	1192	1633	1035	1020	1438	139	588	1675	345	599	70	298	933	50	101	93	1165	1574	962	202	103	280	6558	3667	4819	2610	570
ENSG00000156709	9131	AIFM1	8653	7312	7510	6298	8170	6856	5993	7133	4178	4438	7980	8346	8942	9229	7392	7899	2486	3105	5354	6812	7458	5899	7055	8309	5464	3767	8685	4304	6157	4973	6051	15819	7312	9712	6462	6932	6287	12331	12491	7926	11489	3771	5171	4298	4108	2875	9506
ENSG00000042286	84883	AIFM2	2595	2695	3046	2413	4097	1533	1946	1897	1326	1804	1683	1808	2268	1445	1545	1474	755	2723	2397	1310	2146	2325	3703	2595	2293	1880	3757	2096	3554	3566	2535	3224	3321	2525	2401	3196	1295	3114	2638	2939	3398	2178	2266	1973	1769	1460	1368
ENSG00000183773	150209	AIFM3	1899	1673	2399	5328	5643	1388	4514	3457	4615	5206	4328	3322	2863	414	2001	1910	659	439	221	444	1166	410	2580	3177	5153	3952	3321	5090	695	1791	1849	3100	3086	1332	928	1711	909	710	512	1798	4306	1582	161	83	221	286	2334
ENSG00000146416	51390	AIG1	2908	2623	1648	1379	1606	2187	2049	1344	2359	3333	1946	2238	1835	2780	1483	1196	6461	4781	4341	1290	1961	1758	4577	2439	2659	1014	1892	1461	1520	1612	1548	2465	3708	1916	2331	2612	2551	1628	1745	3060	2598	2200	1438	839	1268	1540	1607
ENSG00000163568	9447	AIM2	0	0	0	2	0	0	0	0	0	0	0	0	0	0	0	0	1	3	4	0	0	0	0	2	1	0	0	0	0	0	0	0	0	1	0	8	0	0	0	0	0	0	0	2	3	1	0
ENSG00000164022	9255	AIMP1	4409	4024	4839	4056	4679	2896	4000	4377	3049	3498	2338	3830	3141	6735	2818	3305	3250	2493	3598	3533	4723	4108	4807	4706	4259	3553	5414	3852	3888	4665	3320	4694	3696	2514	2094	2494	3203	3856	2941	3022	5001	2878	3952	3181	3781	3622	6027
ENSG00000106305	7965	AIMP2	5645	6228	4355	1724	3197	2930	4053	4172	2395	2588	4102	4668	2563	8553	3827	3355	2884	3382	5321	6910	5713	5668	3925	3518	2561	1459	4695	2536	4195	3659	3300	5006	3216	2532	1550	2134	2791	4830	3338	3160	2082	1251	5155	5301	4788	3833	4884
ENSG00000110711	9049	AIP	3378	2477	1832	1971	1931	2792	2090	2226	3461	2991	2442	2325	2984	3057	1583	1582	2402	2426	2206	3047	6150	6468	2597	3032	5737	3215	4277	4229	2567	2902	2637	2311	4536	2537	3288	1844	4830	1722	1864	2628	3152	2241	3437	3710	3552	4429	2639
ENSG00000129221	23746	AIPL1	0	0	0	0	0	0	0	0	0	0	0	0	0	0	0	0	0	0	0	0	0	0	0	0	0	0	0	0	0	0	0	0	0	0	0	0	0	0	0	0	0	0	0	0	0	0	0
ENSG00000160224	326	AIRE	4	0	0	0	0	2	28	0	0	0	9	5	4	4	10	2	0	1	0	3	3	2	4	23	24	2	1	51	0	0	3	5	0	2	55	5	17	4	0	5	8	0	0	0	1	0	36
ENSG00000116922	54955	AIRIM	2012	2792	1488	869	971	1159	1611	1563	967	997	1310	1125	980	1983	1002	1397	1833	1835	2675	2178	2475	2580	1522	1440	1033	920	2102	1406	1381	1920	1798	2076	1524	1674	1241	1138	1375	1312	1139	1393	2156	1398	1270	1187	1040	1087	1729
ENSG00000196581	55966	AJAP1	0	0	0	0	0	0	0	0	0	0	0	0	0	0	2	0	0	0	0	0	0	0	0	1	0	0	0	0	0	0	0	0	0	0	0	0	53	0	0	0	2	0	0	0	0	0	0
ENSG00000232434	389813	AJM1	500	561	278	454	371	125	153	208	333	302	246	172	319	278	281	860	210	222	298	196	374	370	517	679	888	615	325	408	211	327	420	306	284	160	155	155	56	323	173	149	180	176	280	196	177	160	219
ENSG00000129474	84962	AJUBA	7953	12963	3882	8205	4478	2474	1287	1836	5469	4971	2347	3533	4631	2996	2359	4631	3192	2506	5634	2947	3222	5208	2923	1577	6421	5769	6587	5942	6224	6278	3935	3633	2747	1726	5763	2166	2709	4386	3910	2147	1994	3008	3692	2654	2928	5030	3128
ENSG00000106992	203	AK1	2505	2208	1172	255	1081	806	390	165	193	353	264	560	950	346	1448	1923	860	652	1326	544	1017	627	735	1114	472	133	500	137	520	421	753	1182	897	841	734	767	279	824	681	1814	1415	423	629	768	417	549	791
ENSG00000004455	204	AK2	20064	18833	17154	14149	17647	10607	7155	21342	8783	8002	10044	9524	8327	16692	6568	13756	10831	13334	20824	9760	11022	9854	15861	16528	10816	5698	11261	8478	9351	14875	9712	16657	13654	8181	7587	7611	8667	12162	7692	13896	19358	4829	8701	6920	7045	5374	12067
ENSG00000147853	50808	AK3	9977	15144	8154	10554	10313	12496	8396	4945	10275	10559	9043	10101	7357	11485	7205	12105	5960	4736	11061	6257	5984	5383	6293	7012	10871	12694	15504	7663	12078	11738	11244	10324	10564	9752	10652	6980	6568	6200	8146	10748	13608	10837	6533	4644	4706	4746	8915
ENSG00000162433	205	AK4	1596	762	4065	3753	5011	3320	19	5953	1248	546	1096	258	2349	4092	1106	562	2127	185	6685	532	1500	814	983	1632	1476	2291	55	1962	1706	2060	9	3503	3422	302	202	259	1878	864	181	1252	5349	4086	1543	291	932	580	2479
ENSG00000233381	NA	AK4P3	5	1	6	9	11	5	169	150	5	1	3	0	178	254	87	321	312	301	334	236	302	277	136	244	3	2	3	0	4	3	100	138	166	0	22	3	1	1	4	1	8	7	122	94	106	90	4
ENSG00000154027	26289	AK5	0	0	0	0	0	0	0	0	70	81	0	0	0	0	0	0	0	2	19	0	0	0	1	1	1	2	1	3	0	1	0	0	0	0	1	0	69	1	0	0	0	72	1	0	0	0	1
ENSG00000085231	102157402	AK6	506	810	1110	820	1137	692	645	608	681	750	828	677	540	863	425	701	676	608	1076	1047	1351	1471	1442	1565	852	368	826	756	797	894	692	1021	1540	674	804	681	828	1361	958	677	1289	541	1193	844	1020	954	794
ENSG00000140057	122481	AK7	348	237	115	681	361	42	149	70	72	89	265	248	294	219	78	123	404	346	115	132	519	389	57	131	500	525	351	229	51	84	361	120	218	30	79	10	161	310	453	27	175	156	583	298	617	854	150
ENSG00000165695	158067	AK8	44	61	11	16	13	51	24	5	16	27	71	37	97	39	34	83	98	39	83	39	70	68	28	60	90	10	9	43	15	24	90	78	54	33	20	24	57	13	24	12	29	30	67	32	62	73	33
ENSG00000155085	221264	AK9	532	425	157	229	216	387	327	284	450	415	388	827	426	507	142	238	34	69	30	179	214	100	461	581	521	171	191	276	159	244	397	389	443	374	398	370	467	276	381	568	340	455	223	145	137	248	556
ENSG00000231824	642597	AKAIN1	0	1	0	1	0	0	44	1	4	14	3	3	0	49	6	1	1	32	4	0	0	0	3	0	5	2	1	14	2	8	5	6	3	2	8	1	10	0	2	0	0	1	43	8	31	25	0
ENSG00000121057	8165	AKAP1	5808	5285	7799	7886	7473	4413	6664	10311	10267	12519	6454	6287	8287	12251	5120	5438	5234	5032	6799	6271	8383	7991	10072	11950	11770	6456	10436	5945	5271	8667	10061	11117	8973	5961	5396	5050	5972	5677	5000	8117	10688	6406	5733	4515	4489	3994	8495
ENSG00000108599	11216	AKAP10	2019	1903	1750	2270	1904	1267	1204	1019	1370	1489	4559	5442	795	1681	1534	1505	1567	1460	1561	1368	1863	2966	1504	2897	1611	1244	1407	1362	1411	2362	977	1688	1703	1510	1558	1271	1943	1665	1844	1391	2769	1752	1343	1146	1194	1331	3798
ENSG00000023516	11215	AKAP11	14876	7867	2460	2467	2428	4102	1347	2993	4777	4836	3450	4781	4141	4115	3881	4167	2129	2234	2645	3545	4614	3096	4095	5334	2664	2543	2794	3114	7414	5898	4870	5227	4456	6616	7558	9404	7249	2555	3583	7489	7456	5580	4900	2762	3158	2617	4414
ENSG00000131016	9590	AKAP12	183	346	284	147	200	108	129	7	9	3	12	8	63	49	20	23	136	830	696	35	381	273	130	69	48	125	143	431	392	144	188	14	5	185	1073	168	40	1096	277	106	292	892	816	2058	365	821	31
ENSG00000170776	11214	AKAP13	6039	4837	6768	8207	7607	2379	4093	3915	6481	6075	2567	4366	3803	3850	3601	6640	3478	7285	5556	3042	5508	3554	4737	4563	4784	3727	4400	2588	3002	2792	3649	4031	3509	3338	5079	3521	3051	5648	8462	6425	8792	5621	7906	5850	5230	4962	4749
ENSG00000186471	158798	AKAP14	7	0	3	4	11	13	2	14	2	1	8	2	22	0	11	8	1	2	3	7	9	7	3	0	0	0	3	1	5	3	3	14	4	18	2	11	18	10	6	1	4	1	0	3	8	9	4
ENSG00000197976	8227	AKAP17A	3668	5439	1941	2707	1899	1429	3415	1577	2145	3323	1707	2031	3884	1560	2171	2531	2075	1818	1599	2406	5209	4281	4315	3933	1986	1188	1922	1963	2082	2656	3265	3833	2228	2351	2279	1539	3255	2013	2250	2615	3586	2026	2349	2254	2879	3082	1387
ENSG00000111254	10566	AKAP3	83	105	10	13	20	23	35	8	25	25	14	53	62	50	30	42	6	19	6	54	47	28	15	15	97	98	77	61	47	58	45	25	8	12	48	18	121	14	29	23	24	45	61	37	27	45	49
ENSG00000147081	8852	AKAP4	48	82	0	2	0	0	0	0	2	4	9	220	0	49	2	3	0	2	0	4	2	1	0	3	0	0	0	0	0	1	64	4	0	2	18	1	3	1	1	1	3	0	0	0	0	0	0
ENSG00000179841	9495	AKAP5	12	7	228	762	418	20	27	1549	427	268	144	392	62	1429	38	467	240	333	220	176	201	141	306	222	460	671	756	205	53	88	39	285	186	17	66	9	44	185	213	156	150	45	250	219	232	154	446
ENSG00000151320	9472	AKAP6	513	660	54	31	65	194	380	48	87	137	92	306	68	229	99	88	36	102	109	42	38	16	62	25	407	149	370	261	229	166	355	101	136	366	793	625	299	136	346	166	81	128	345	301	212	295	317
ENSG00000118507	9465	AKAP7	19	56	1534	5130	1958	189	161	3841	2259	1107	204	146	329	1908	230	705	1015	914	1378	86	69	94	295	352	5317	2302	651	813	148	63	124	487	336	167	144	161	5	269	345	79	123	271	418	266	361	287	947
ENSG00000105127	10270	AKAP8	2490	1891	2594	2188	2609	1743	2158	2384	3906	4018	1905	1929	2806	3986	2087	3012	2338	2083	3939	1512	2540	2682	4035	3640	3148	1933	2648	2292	2380	2582	1894	3378	2425	2185	3503	2293	1664	1942	1971	2552	2241	2269	1396	1417	1168	1254	2812
ENSG00000011243	26993	AKAP8L	3970	3915	2235	2727	2841	3271	2549	2544	4290	4767	2502	2663	4269	4312	2597	4865	4533	3014	5461	2289	3869	3217	5011	4575	5296	2740	4101	3889	2809	4004	3236	4112	3732	3347	5164	2993	2868	2360	2533	2964	3602	3138	1820	1355	2008	2744	3433
ENSG00000127914	10142	AKAP9	13480	11851	4880	7863	4822	5544	7702	7029	8525	7207	4598	8836	5472	6178	10796	6011	5690	6863	7299	4913	6791	6423	6654	6142	8176	6263	7558	7573	7194	7264	4481	5014	6487	7612	8801	7525	5697	6673	11163	5604	13756	4498	9721	5866	7368	7781	6736
ENSG00000166452	56672	AKIP1	1666	1806	1116	763	974	1059	1000	1610	890	1000	1236	1500	833	1211	1684	834	966	1411	1230	1747	1929	1435	1343	1617	1239	660	1117	1149	1457	1501	1469	1781	1868	1083	1010	878	1027	1253	1266	1130	828	792	806	668	707	761	1236
ENSG00000174574	79647	AKIRIN1	4934	5281	4687	3741	4820	5200	3872	4758	2515	2532	3239	4368	3084	5909	2622	2974	6453	7962	8889	5258	9176	7947	4286	3458	2699	2826	6086	3623	2269	3741	2786	4189	4600	6987	8247	5126	3590	4034	4902	4908	6080	6114	3408	2515	2782	2686	2943
ENSG00000135334	55122	AKIRIN2	2811	2844	989	817	848	1745	1084	657	2584	2628	1909	3214	2269	2298	1606	1788	1120	1222	1113	1138	1561	1657	1797	2656	2940	1207	1838	1416	2334	1752	1717	1840	2204	3928	9277	2503	2055	915	963	1608	1692	2228	943	812	777	1014	2426
ENSG00000106948	80709	AKNA	1671	1532	793	1624	1328	1628	314	762	1369	1457	1505	737	1820	1257	697	1429	738	595	654	2199	3139	4683	1039	1708	1727	1772	1302	1467	236	582	1373	1886	1363	536	1407	346	3178	679	819	551	4981	1315	1020	881	733	943	1362
ENSG00000162641	254268	AKNAD1	60	169	4	12	13	41	69	7	108	118	23	145	28	12	70	23	16	82	42	6	3	5	65	33	40	69	33	25	57	56	103	106	116	96	192	73	2	48	110	137	24	129	27	32	24	20	22
ENSG00000117448	10327	AKR1A1	19851	13157	8830	10122	11818	4020	5752	3987	3470	2979	4937	4405	5381	3222	3023	7022	4550	4887	5823	3436	7796	6449	5535	4257	3647	4064	6344	5526	5547	6789	4745	3726	3878	7101	7830	5119	5687	6582	8055	6242	6883	7624	3984	3092	2787	2707	3236
ENSG00000085662	231	AKR1B1	215	94	7	8	3	6563	27	32	111	49	3304	5086	952	32	51	17	4194	2213	3215	644	258	54	1285	804	42	9	292	152	2	25	5	7624	6270	143	29	33	1694	19	40	2081	1358	3200	7	3	6	2	5
ENSG00000198074	57016	AKR1B10	1665	840	16611	15327	17038	1554	229	18611	4	5	666	1245	355	10802	45	5131	2086	31028	1622	7345	22779	25270	42	808	2389	1498	15700	577	84	95	315	3172	9991	727	3147	237	113	2118	799	1654	16922	7	2012	2889	2242	3716	5947
ENSG00000227471	441282	AKR1B15	15	8	2	1	2	3	2	5	2	0	3	14	0	114	2	154	56	62	27	40	153	143	0	4	11	5	103	2	1	0	1	21	74	3	28	3	0	17	3	12	162	0	29	30	23	25	49
ENSG00000187134	1645	AKR1C1	1455	3451	252	185	191	232	40	125	855	375	2972	14115	466	4069	163	724	9409	34185	3601	4988	13496	19165	116	346	201	175	306	374	713	1672	2129	2009	3639	285	1005	174	1469	299	380	550	12118	424	537	478	748	1495	2839
ENSG00000151632	1646	AKR1C2	1016	410	140	640	315	459	84	1461	2059	981	2519	8004	807	2693	288	680	8327	32975	1920	782	1561	1898	58	338	1707	836	5990	3825	170	1538	171	2136	5170	461	1440	404	533	142	159	498	8383	169	394	240	373	680	3733
ENSG00000196139	8644	AKR1C3	31605	35837	10052	15215	15383	19362	2288	12187	17322	15525	31542	54681	23375	35694	6915	10077	13909	76276	28323	42403	106604	117736	767	7109	19068	15728	56559	16757	12741	28840	31953	32308	71427	7961	17735	5710	29285	6475	7016	13074	79850	9162	6277	4683	5335	8973	10802
ENSG00000198610	1109	AKR1C4	2475	1324	30	0	4	119	56	7	20	61	70	1155	384	288	211	45	6	11	5	434	473	200	5	49	19	1	22	14	866	20	332	9	12	827	1094	610	3507	2	39	94	8	40	158	198	64	57	69
ENSG00000264006	340811	AKR1C8	7	6	0	0	0	4	0	2	22	20	3	27	26	11	25	6	3	3	0	1	45	8	0	2	6	0	1	10	8	1	66	8	3	27	120	36	17	0	0	4	13	7	3	3	0	3	3
ENSG00000122787	6718	AKR1D1	0	1	0	1	1	3	0	3	0	0	1	20	0	19	1	10	8	3	12	5	3	2	2	1	3	0	2	1	3	1	0	2	6	0	1	0	0	0	0	9	7	0	0	0	0	0	5
ENSG00000165568	83592	AKR1E2	162	239	348	420	397	437	265	723	756	885	414	428	1176	362	460	392	6	288	14	2	10	0	532	397	974	1086	885	1090	782	1137	258	638	976	123	44	63	459	815	706	399	63	462	12	3	7	13	427
ENSG00000053371	8574	AKR7A2	2682	2315	4222	4149	4404	3517	3046	4515	2702	2553	3706	3428	3109	2944	1895	2705	3024	5040	4410	3172	3898	3062	3371	3134	3185	1894	2819	2514	3328	4149	2374	2873	3657	3314	3642	2434	2995	4305	4637	2149	1752	1056	3250	3215	2259	2324	2732
ENSG00000162482	22977	AKR7A3	2454	1261	2669	1849	2171	1179	235	3072	811	840	713	575	1715	418	767	1294	251	69	561	971	1456	1085	1441	1536	2515	2113	1747	3259	1186	948	1774	1538	1615	505	376	640	1063	1216	569	1145	997	486	1496	1397	758	934	1523
ENSG00000211454	246181	AKR7L	332	283	227	238	260	47	22	217	42	53	78	68	242	47	76	198	32	16	68	136	238	179	369	323	387	236	199	564	85	132	223	265	311	20	43	50	42	146	89	183	224	129	159	130	95	125	137
ENSG00000142208	207	AKT1	9921	8307	12733	6905	10221	5553	11342	5733	8729	9500	8701	7589	6065	9123	7730	7996	8850	9967	12329	8983	8189	6982	12354	10895	11586	7938	14870	9191	16076	12990	9094	10978	9931	7404	7747	6781	8763	20757	17605	5988	4374	8879	23437	21120	21258	17741	10338
ENSG00000204673	84335	AKT1S1	723	796	898	503	692	807	1049	1093	1261	1525	535	609	674	1089	660	613	810	746	1626	794	769	841	2253	1624	1085	738	744	1126	860	1077	819	1154	766	972	1059	1029	406	673	758	1151	952	754	983	811	813	783	1756
ENSG00000105221	208	AKT2	7172	9349	6501	4446	6387	5478	7471	5641	7823	8818	5115	4799	6921	7410	5523	5131	6474	4628	10178	4539	5054	3823	12238	9487	5972	3775	5579	6247	5398	6952	6789	9574	5472	6177	8393	6392	4610	5612	5375	6122	5429	5712	8339	6340	6797	6216	7710
ENSG00000117020	10000	AKT3	2	1	0	0	0	1	0	2	0	4	0	5	8	0	4	0	1	2	12	1	0	1	0	1	1	1	0	3	8	11	0	22	0	0	5	0	4	0	0	0	1	6	13	16	30	33	6
ENSG00000166971	64400	AKTIP	1263	3484	1299	1389	1140	1448	632	1237	1478	1487	1322	1398	943	1147	789	767	1198	1596	1380	1073	1490	1380	1776	1598	1458	881	1588	766	1889	1584	1599	2288	2026	1117	2013	1419	1483	1958	2209	1875	1893	1041	705	1013	662	798	971
ENSG00000148218	210	ALAD	2915	4313	1262	2344	1669	1907	1388	1200	2283	2040	1276	1565	2735	2253	1645	3336	2547	1869	2700	1601	3529	3347	1052	1650	4595	2196	2387	2576	1909	2083	2335	1573	1922	1863	2122	1337	1592	1434	2156	1770	2867	1700	2139	1488	1976	1921	1367
ENSG00000023330	211	ALAS1	6425	6098	4830	10930	7227	5051	4565	6485	3328	3623	5498	6213	4689	4589	4429	4112	5690	7938	5949	4454	6958	8163	4381	4390	3522	3077	4920	2325	4318	4009	5688	7659	6742	6833	7688	5855	4516	6009	5620	7816	8726	3203	2765	2900	2541	2742	4790
ENSG00000158578	212	ALAS2	0	0	0	0	0	0	0	0	0	0	0	0	0	0	0	0	0	0	0	0	0	0	0	0	0	0	0	0	0	0	0	0	0	0	0	0	0	0	0	0	0	0	0	0	0	0	0
ENSG00000163631	213	ALB	3	5	0	0	0	1	0	2	1	0	0	0	1	19	0	0	0	0	6	1	2	4	3	0	1	7	0	7	2	5	1	0	0	0	6	4	0	0	0	20	10	0	2	1	3	3	4
ENSG00000170017	214	ALCAM	4136	3494	2645	7308	3980	6401	6148	4430	5364	5015	7819	12318	2905	1362	3254	3272	4796	4485	1561	1614	1979	709	13099	6339	6032	9090	2544	4389	11158	35677	2240	3149	2727	10427	13286	3729	628	9911	13965	4206	5021	5431	11212	6460	8019	10890	7754
ENSG00000161618	126133	ALDH16A1	2296	2063	3577	1172	2852	1938	1735	911	2930	3185	1890	1605	1290	1856	1294	1519	1432	1391	4753	2258	1587	1709	3035	1927	742	377	995	837	2764	1885	1451	1679	1223	2729	2282	2446	2751	3750	4038	2849	713	1216	4931	3781	2885	2212	1963
ENSG00000059573	5832	ALDH18A1	19648	14014	20188	26157	28683	13269	11251	22693	35155	34490	13796	25559	30415	30649	10601	14044	16789	13924	13430	12958	22775	11327	26624	23244	22661	27126	19630	19119	14959	15699	16502	14954	17565	25261	16696	23492	19956	18752	18185	25178	30042	25059	16777	11645	13208	9488	15918
ENSG00000165092	216	ALDH1A1	16616	12638	22173	17812	23705	4732	2870	7901	21376	29070	7554	33650	6747	67729	2613	8709	264	9385	6847	34073	35570	21784	367	4059	15501	1222	29984	10808	384	3121	19823	3821	4054	23967	9615	6404	28766	10645	13335	2702	36347	476	10038	3226	11925	11737	33569
ENSG00000128918	8854	ALDH1A2	51	25	7	1	5	1	4	2	12	6	2	4	3	29	3	8	42	38	262	4	9	10	3	4	11	16	12	0	32	0	62	6	0	1	7	5	9	411	120	8	8	1	907	2139	1716	885	7
ENSG00000184254	220	ALDH1A3	247	697	1386	155	968	312	4178	72	344	475	215	84	127	118	804	371	1598	824	2166	67	262	168	1472	502	173	11	306	141	259	322	2490	579	171	1594	1411	1848	76	2406	2695	2521	112	1348	269	294	191	378	135
ENSG00000137124	219	ALDH1B1	5489	5508	17942	8045	14559	9280	19172	3928	10489	11279	8163	8367	31562	12119	9889	14516	2689	3723	8613	4220	3008	1789	12649	11526	8279	5724	17234	7287	8311	7009	17082	14050	6527	12007	3571	9658	11706	16312	19991	5598	3591	22303	13631	8417	10691	6723	13467
ENSG00000144908	10840	ALDH1L1	8	1	2312	3955	5993	1	653	2197	8	2	7	50	10	383	16	521	413	284	39	142	752	55	28	61	536	1	1367	191	97	70	1	254	908	63	114	204	287	67	6	3886	183	23	2	15	10	22	578
ENSG00000136010	160428	ALDH1L2	2367	1260	3	6	2	337	323	2132	37	31	1887	340	35	73	65	134	4	11	23	1598	1956	2000	250	517	2206	1240	2280	663	505	783	41	1321	339	91	51	90	30	37	99	379	61	41	63	47	125	67	382
ENSG00000111275	217	ALDH2	11836	11883	12543	33738	19025	14391	8709	17887	20155	23004	13543	20118	13534	13388	9241	10935	8111	10775	10539	20747	30776	25198	7324	9811	23215	10938	21155	11260	9075	14074	11474	19448	22868	20556	18774	10587	14537	20801	25922	24733	36378	13061	12510	9351	9639	9844	16083
ENSG00000108602	218	ALDH3A1	11597	15568	8492	5228	7263	6691	3992	1361	911	859	9240	4207	1116	537	2643	775	288	329	355	40563	83908	143044	213	593	573	1234	5745	922	3362	4624	7957	2344	4300	8859	493	2094	107	13339	16812	1745	11045	766	6935	6302	5489	14695	4961
ENSG00000072210	224	ALDH3A2	16516	18940	19310	17500	20329	13605	7741	6445	8480	8386	50337	49892	4087	7975	25485	10345	11771	11320	16281	11594	13009	26707	6458	16087	4870	5001	9033	4765	12234	19905	9220	13674	13147	11812	10690	7175	2442	15759	19452	6519	14655	6705	11095	8903	9173	7958	22615
ENSG00000006534	221	ALDH3B1	4565	3438	1697	1636	2843	1182	330	827	1813	1408	977	2532	628	522	714	1494	1791	1405	870	364	1147	1045	859	1034	993	1230	1282	584	764	662	855	516	702	1343	1271	1292	644	772	762	2842	1660	339	859	729	850	1710	604
ENSG00000132746	222	ALDH3B2	23	62	8	364	108	72	14	51	71	73	29	52	25	12	105	16	123	299	22	255	392	137	11	48	42	4	28	25	15	115	2	11	37	132	158	62	43	75	95	306	10	54	21	28	19	29	55
ENSG00000159423	8659	ALDH4A1	3687	4453	4165	1613	3543	6068	9704	1588	990	1575	5286	2245	2138	2400	5172	3071	941	2131	2078	1886	2077	1131	1804	2499	2165	823	1914	1490	3981	4332	10219	1914	2957	12443	6781	7979	6205	3041	6903	5105	1505	3628	2701	2765	2513	2672	3703
ENSG00000112294	7915	ALDH5A1	506	611	641	864	741	2338	1439	3753	1572	1581	3514	3393	2349	1813	1003	2933	1979	781	1081	2448	5133	4021	981	1104	1070	553	1421	2196	616	1790	1372	3313	4154	923	894	617	3195	688	1518	2219	1648	1187	1749	806	1255	1539	2661
ENSG00000119711	4329	ALDH6A1	2619	3041	1337	2324	2010	2109	2353	1089	2337	2276	2261	5449	2319	3146	1528	3191	1964	969	1183	1408	1825	1149	961	2304	6070	3966	6023	4923	966	2012	1630	2090	3678	1644	2685	1146	3443	2074	3936	1752	4591	2875	3621	1542	3425	4142	2068
ENSG00000164904	501	ALDH7A1	990	2331	6140	7555	9069	6249	4333	4383	7029	6832	5326	6613	4439	7062	2228	2853	5527	3792	6727	5271	7897	5338	4477	4501	4973	2977	4244	4356	3094	4384	3682	4289	7872	3700	3741	2312	4627	10827	12251	4846	3643	12142	7398	4543	4363	4624	5710
ENSG00000118514	64577	ALDH8A1	19	17	3	3	11	64	2209	34	33	46	15	12	31	20	13	7	15	22	9	6	10	11	19	14	23	11	11	20	8	29	11	19	13	10	25	19	8	12	10	302	142	13	6	7	8	11	51
ENSG00000143149	223	ALDH9A1	6691	5717	5617	6953	6010	4276	4068	4557	5515	5444	4736	5783	5155	5309	4148	4187	4819	3173	7340	6399	11295	8904	6165	7207	4805	2836	5120	4217	4695	3538	3146	7054	6338	6987	5791	5811	3012	6396	7407	5210	4303	4545	7046	5834	5496	4679	6256
ENSG00000149925	226	ALDOA	8762	3423	10691	15980	14701	4961	3824	9725	8499	8224	4522	4361	12171	9948	3190	4496	5898	7731	6587	5113	10689	5609	8032	11984	15981	13213	7129	6148	5997	5477	3534	7879	8948	5073	6381	5318	3991	10171	7830	4634	6504	5642	3682	5147	2874	3002	6497
ENSG00000136872	229	ALDOB	120	34	111	8	40	51	5	15	1	2	9	22	758	28	22	4	0	2	79	5	95	11	7	13	0	1	8	1	43	2	97	37	36	41	34	36	3	1	0	45	95	61	2	1	0	0	95
ENSG00000109107	230	ALDOC	6710	1893	5169	19927	12597	2918	1528	14358	17192	18410	10751	7765	9646	5620	2219	4754	13202	8729	8797	2824	11248	9004	2968	6579	14502	13157	2836	8055	1080	1427	6189	5635	9383	2743	4622	1773	1138	1207	800	3991	8886	6159	1568	1589	2176	2100	3742
ENSG00000033011	56052	ALG1	3478	2741	2962	1582	2508	3790	4272	3302	2777	2966	2009	2844	3173	3561	3469	2432	1706	4184	5201	2531	2394	1289	2399	2359	2401	1507	2781	2435	3194	2964	1902	2763	3533	4001	2567	4077	2405	6118	5300	3576	1715	2582	2482	3781	1597	1474	8956
ENSG00000139133	84920	ALG10	370	338	459	401	343	481	946	295	486	538	363	581	604	775	355	405	320	598	455	695	841	464	444	529	528	378	562	565	368	415	319	346	331	413	512	361	721	878	866	386	496	551	1062	761	804	708	596
ENSG00000175548	144245	ALG10B	338	592	251	294	233	627	951	250	543	568	355	551	1034	1027	480	662	536	591	347	421	565	326	431	502	630	407	699	634	390	552	202	600	403	777	1021	569	946	643	973	422	436	782	1191	793	868	979	558
ENSG00000253710	440138	ALG11	2447	1755	824	820	878	966	727	843	1231	1486	858	1430	1198	1242	1075	1442	689	588	750	1424	1513	1000	1420	1825	851	726	987	1192	2091	1660	1669	1448	1625	1956	2226	2350	1813	885	929	2078	2303	1560	1361	884	1247	1156	1039
ENSG00000182858	79087	ALG12	1849	2046	2143	1359	1941	765	2093	1777	2155	2335	1218	883	1285	3077	1013	1081	1219	2643	1963	1275	1557	1381	2420	2128	2133	1658	3251	1974	1460	1852	2002	1619	1644	1254	1432	916	741	1617	1818	1095	1104	1437	1348	1114	1123	801	2739
ENSG00000101901	79868	ALG13	1449	1751	1700	1646	1690	869	1153	1086	1646	1603	915	1256	1416	1643	1077	1307	574	781	969	874	892	637	1256	1249	1410	1201	1333	1087	917	947	1055	2497	852	1515	2223	1569	1316	2063	2313	842	1178	839	1227	1202	1011	972	1527
ENSG00000172339	199857	ALG14	2584	1849	882	868	920	430	860	969	838	888	396	397	648	1007	691	628	411	713	945	458	391	480	1313	964	581	568	1180	569	667	875	705	769	547	589	690	674	518	778	694	830	721	788	745	388	644	377	803
ENSG00000251287	644974	ALG1L2	30	57	29	42	41	62	52	15	77	64	72	88	78	46	22	13	7	3	4	92	93	56	72	51	4	17	25	5	2	21	7	36	22	32	29	54	42	38	53	51	27	97	70	69	81	67	17
ENSG00000119523	85365	ALG2	5754	6708	2414	2364	2981	1942	2322	1330	2318	2392	1270	1822	2407	3250	2613	3513	2741	1857	4819	1200	1676	1459	2066	2586	3101	2167	3334	2473	2920	2111	3319	3263	2408	3047	3452	2431	1976	1916	2316	2749	2890	3313	2739	2237	2087	1729	2748
ENSG00000214160	10195	ALG3	1236	1110	2177	1108	1552	1731	2133	2770	1877	1971	2274	2824	2237	3805	2109	1537	2457	2528	4403	2495	2804	3180	1803	1945	1568	1058	1930	1493	1900	1751	1475	2857	1877	2817	1345	2252	2589	1713	1276	2688	2197	1739	2395	2126	1685	1264	2571
ENSG00000120697	29880	ALG5	13860	7875	2247	1847	2140	2144	7038	2270	2605	2824	1919	2873	2772	3126	2531	3015	838	976	1804	2441	2591	1303	2486	3672	1949	1441	1956	2445	5415	4104	2110	4104	3544	3050	3147	3698	4600	1881	1538	4120	4402	2513	2884	2292	1690	1312	2497
ENSG00000088035	29929	ALG6	1906	1400	1420	903	1322	867	1438	1074	906	971	790	913	705	1286	757	759	637	820	1373	1364	1970	1396	1006	1068	728	491	1694	1032	903	930	992	1119	1130	834	983	732	785	1407	1520	817	1027	995	1046	594	507	399	1124
ENSG00000159063	79053	ALG8	2252	1979	1848	1095	1590	2472	3143	3783	1973	2499	2105	3424	1666	5302	2029	1640	3083	3675	4672	3684	3197	2957	3356	3931	2837	2112	4435	2691	2736	2789	1978	4538	6532	2574	1752	2395	2733	2228	2044	3391	2221	1397	5371	4419	3784	2798	4177
ENSG00000086848	79796	ALG9	687	914	527	448	574	513	928	723	727	835	831	768	446	1014	672	488	547	598	658	452	469	523	851	864	684	418	1127	397	902	805	712	994	923	755	885	662	688	525	613	674	754	572	1276	764	905	708	789
ENSG00000171094	238	ALK	0	0	0	0	0	2	0	0	0	0	0	0	1	1	6	0	5	15	1	0	0	1	1	0	0	0	0	0	0	0	0	0	0	2	7	0	0	1	0	8	0	0	0	0	1	0	0
ENSG00000196711	389658	ALKAL1	0	0	0	0	0	0	0	5	0	0	0	0	0	0	2	9	0	0	0	57	82	32	69	101	0	0	3	1	109	170	0	0	1	84	7	125	0	43	82	1	171	73	0	0	0	0	37
ENSG00000189292	285016	ALKAL2	0	0	0	0	0	1	0	0	0	0	0	0	1	0	360	4	0	0	0	0	2	0	3	3	0	0	0	0	0	0	1	0	11	8	11	1	0	0	0	0	3	39	0	0	0	6	2
ENSG00000100601	8846	ALKBH1	934	1072	799	651	757	431	861	384	718	695	563	511	650	807	383	582	594	679	826	579	701	862	700	772	996	845	1202	952	900	657	796	706	408	451	514	334	768	1186	1117	360	757	524	1462	1069	1199	1125	720
ENSG00000189046	121642	ALKBH2	516	868	1332	1176	1061	1048	542	824	1032	1069	591	631	980	1014	463	645	1360	1335	1688	888	1222	1066	1071	805	651	289	964	496	793	991	796	1173	948	684	519	433	1528	1083	689	656	1039	1071	1201	978	1205	935	1224
ENSG00000166199	221120	ALKBH3	1993	2853	1681	1099	1799	1797	1669	767	1861	1833	1829	2251	738	2872	911	1789	772	1723	1869	1503	1169	1010	1376	1844	132	282	116	349	1448	1631	1	2866	2708	1303	1314	1036	1700	1251	1175	2120	432	1275	940	729	918	822	2069
ENSG00000160993	54784	ALKBH4	1010	1155	981	475	631	1009	1016	1204	1228	1056	773	655	726	1033	1060	689	924	976	1388	1091	814	784	1071	892	1214	643	1429	983	1167	1275	1025	1031	1136	976	562	660	513	1017	1012	599	467	835	1378	1022	1656	1278	1122
ENSG00000091542	54890	ALKBH5	7727	5408	9015	8473	8998	3967	4951	5407	4796	4309	4579	4051	2272	6380	4577	4932	5178	6450	9229	5063	5113	7428	5129	4644	4789	4089	5833	3826	4967	3417	3636	6959	4908	4803	4749	3982	5326	6262	6834	3710	9310	2784	5687	5517	4590	4119	5063
ENSG00000239382	84964	ALKBH6	168	193	98	96	122	160	156	138	230	251	132	150	280	176	149	153	335	160	321	134	249	151	407	320	251	167	166	300	135	196	253	277	267	162	317	131	82	102	111	155	59	149	190	106	126	163	135
ENSG00000125652	84266	ALKBH7	3582	2432	1373	1463	1745	1630	1765	1465	2988	2643	1418	1311	3330	1839	1611	2039	2625	1449	3371	1102	2227	1956	875	747	2620	2253	2063	1874	778	1355	1665	1667	1862	2580	2197	2043	1632	1321	1230	1450	1975	1902	1242	789	839	1083	1307
ENSG00000137760	91801	ALKBH8	450	949	638	442	581	632	1068	545	780	769	564	779	407	1250	517	473	583	838	735	513	457	417	918	879	693	428	1149	457	642	665	539	1009	1069	516	406	370	712	532	546	735	550	632	1209	1014	901	630	1286
ENSG00000151360	55821	ALLC	0	0	0	0	0	0	0	2	0	0	0	0	0	1	3	0	0	0	1	1	0	2	0	1	1	0	0	0	4	1	0	6	1	3	3	4	1	0	0	0	5	3	2	2	1	0	0
ENSG00000116127	7840	ALMS1	2328	2757	2568	1362	1688	1590	2289	2218	2846	3107	3500	3268	2382	2209	3482	2961	3282	5003	4822	2281	2489	2198	3499	4380	1249	1102	1691	1474	2686	3576	2270	3245	3185	2527	3172	2445	1769	2497	3436	2211	2468	2235	3890	2971	2985	2512	2067
ENSG00000108839	239	ALOX12	0	0	0	0	0	1	0	0	0	0	8	5	1	1	4	25	0	1	0	0	0	0	0	0	2	10	25	0	0	0	0	4	2	0	0	0	0	0	0	3	1	0	0	0	0	0	0
ENSG00000179477	242	ALOX12B	37	27	0	19	1	3	0	4	3	2	17	5	3	14	41	42	19	13	5	65	94	46	5	26	15	7	0	1	7	7	4	48	42	5	38	4	18	7	1	5	3	9	8	0	10	4	2
ENSG00000161905	246	ALOX15	311	76	8	23	26	13	2	13	5	1	9	59	139	18	12	30	13	14	3	27	281	52	3	71	98	42	46	52	17	7	15	7	41	14	12	10	186	12	25	44	18	2	123	23	61	59	139
ENSG00000179593	247	ALOX15B	6	1	1	19	2	9	22	4	73	25	3	14	10	24	10	86	11	4	19	6	8	5	1	13	58	12	1	5	0	1	5	2	4	65	229	32	84	2	1	32	14	3	0	0	0	2	0
ENSG00000012779	240	ALOX5	0	0	1345	1475	1909	3	0	2	2	2	1	110	60	15	0	7	63	15	47	0	6	2	17	63	9	7	1	2	8	5	0	31	14	2	6	12	4	587	327	13	3	56	389	257	212	344	66
ENSG00000132965	241	ALOX5AP	2	3	6	2	1	23	84	3	7	17	10	25	18	4	50	10	1	2	1	14	14	1	7	18	0	0	0	0	7	8	2	8	9	97	93	200	27	8	21	85	2	7	13	9	10	9	2
ENSG00000179148	59344	ALOXE3	45	31	4	9	3	3	4	1	4	2	4	3	5	9	15	4	5	15	15	2	6	12	6	3	4	5	1	2	25	4	7	13	1	4	4	0	2	13	2	4	1	0	10	11	9	17	1
ENSG00000163286	251	ALPG	133	107	53	139	234	24	7	6	1596	158	288	2597	42	73	3	116	5382	3169	3261	50	37	16	16	576	1	15	20	3	12	33	5	29	29	26	195	23	55	11	3	421	0	1	23	77	4	45	211
ENSG00000163295	248	ALPI	19	5	70	82	39	16	29	12	437	180	25	87	143	76	48	430	193	228	717	33	130	160	17	90	40	40	6	2	13	6	55	118	70	1383	1256	380	15	1	0	168	481	7	18	24	37	72	3
ENSG00000073331	80216	ALPK1	2071	1736	813	1652	1437	1546	715	549	1395	1863	393	1592	1278	1238	428	657	561	466	275	745	1811	1161	829	1070	2392	2491	1653	751	710	1082	701	850	1293	657	616	839	1113	775	1036	793	3816	1196	1178	738	1433	2091	874
ENSG00000198796	115701	ALPK2	7	9	4	1	13	0	1	5	6	7	1	4	11	11	0	0	1	3	11	1	3	2	1	0	1	3	7	3	1	1	3	3	3	2	5	1	0	1	4	1	1	1	2	1	7	3	4
ENSG00000136383	57538	ALPK3	63	77	64	147	178	945	2167	144	185	181	405	1128	685	525	85	109	44	81	27	61	268	164	3789	1682	1317	2341	3732	1984	7	18	30	1120	237	3784	4321	4229	28	154	2060	161	1682	45	105	270	286	246	146
ENSG00000162551	249	ALPL	0	2	0	1	0	16	1	1	3	2	3	7	0	2	0	9	0	3	3	1	2	5	13	3	0	3	0	0	0	0	0	0	0	5	10	3	0	2	3	17	0	0	0	2	3	4	0
ENSG00000163283	250	ALPP	16	62	15	27	29	5	3	0	508	90	85	436	3	14	6	25	4351	4418	4685	14	2	0	46	60	3	0	2	1	67	88	10	19	3	64	47	49	7	15	46	211	0	0	8	62	3	35	55
ENSG00000003393	57679	ALS2	2730	2615	2931	2191	2161	2114	1457	1047	2046	2264	2480	2428	767	1864	2096	1857	4013	5177	4127	2971	4635	3852	3148	2770	2564	1513	2155	2691	1819	2485	2287	3388	3458	4973	7398	3819	2094	3103	3899	3247	4029	2365	3918	2555	3967	3238	1487
ENSG00000178038	259173	ALS2CL	1248	1548	1236	3333	1925	1825	1030	837	2226	2143	1167	1914	3256	693	1175	1155	2382	2077	948	1307	4085	3805	3152	2034	1072	994	798	886	1294	2198	1499	1504	1487	3554	7162	4849	820	1455	1407	3214	3084	1836	257	459	301	460	1201
ENSG00000180318	8092	ALX1	0	1	0	0	0	4	0	0	0	0	0	8	17	45	3	0	0	0	0	2	0	2	0	0	1	0	1	0	121	106	0	0	1	13	4	16	0	0	0	9	1	0	0	0	0	0	68
ENSG00000156150	257	ALX3	0	0	0	0	0	0	0	0	18	16	6	0	8	15	1	0	0	0	0	1	5	3	5	10	1	0	0	0	0	0	0	5	0	0	9	0	17	0	0	22	0	0	0	0	0	0	0
ENSG00000052850	60529	ALX4	1	1	0	0	0	0	0	0	3	2	0	0	1	0	0	2	3	1	2	0	0	0	1	0	0	1	0	0	0	0	0	0	1	0	5	0	2	0	0	0	0	0	0	0	0	0	0
ENSG00000183684	10189	ALYREF	2925	2389	5766	2534	4095	2350	8428	7755	4288	6863	3436	4186	3572	10227	3892	3194	3591	5497	7366	5895	3850	3753	9934	10105	5039	2688	9203	4226	5319	3846	4255	10363	5349	2473	2299	2428	2690	6271	4505	3230	3031	3970	8457	8551	7491	4308	6740
ENSG00000242110	23600	AMACR	254	357	116	89	124	537	557	123	379	391	765	2217	485	791	1093	322	42	83	92	94	154	71	139	122	105	54	134	115	182	378	158	265	169	1122	336	732	493	411	787	515	235	139	337	173	154	138	611
ENSG00000178522	258	AMBN	1	4	0	0	0	4	1	0	1	0	0	1	0	10	3	0	0	1	0	3	2	0	0	0	9	2	7	0	1	1	1	1	0	10	1553	0	3	0	0	0	1	0	42	1182	467	1589	3
ENSG00000106927	259	AMBP	267	66	54	41	21	53	190	36	26	14	52	83	432	207	51	219	10	11	16	611	1117	478	1	9	286	96	257	439	8	11	27	279	75	179	9	89	103	24	62	20	122	88	24	9	7	16	29
ENSG00000110497	55626	AMBRA1	2680	2363	2529	2080	2384	2733	2922	3176	2876	2811	2666	3085	1999	4513	1561	2191	2051	3575	3203	3679	7204	5302	3732	4461	3246	2241	2509	2228	3225	3149	2065	3805	5497	2532	2659	2195	2707	2472	3097	3982	4272	3017	1944	1539	1630	1538	5016
ENSG00000123505	262	AMD1	13467	8099	17860	13496	14422	7254	16847	10084	11163	11198	10304	11603	15588	16904	9677	7757	10793	15807	21507	9010	14431	24670	21386	18476	10159	6528	8650	7391	19604	12822	5678	14515	11762	6594	6671	8376	13898	17408	13825	10214	10346	8634	11049	9588	7416	6464	20715
ENSG00000139344	144193	AMDHD1	25	41	4	0	3	1	46	6	11	13	1	4	31	33	125	40	10	13	20	69	37	15	8	7	54	9	27	31	15	19	49	29	32	47	34	44	12	9	11	53	1	14	306	296	272	168	20
ENSG00000162066	51005	AMDHD2	595	713	1396	344	951	498	1335	671	340	261	668	748	639	678	1003	1010	773	2845	1998	1033	1002	439	430	397	490	273	695	293	899	817	696	522	1137	1039	882	919	763	1096	1637	1287	518	587	793	1015	414	392	712
ENSG00000125363	265	AMELX	1	3	0	0	4	4	0	0	2	0	1	16	0	0	1	0	0	0	0	1	1	4	4	8	0	0	0	0	0	2	1	5	0	7	2	4	0	2	1	0	0	2	0	0	0	0	1
ENSG00000099721	266	AMELY	0	0	0	0	0	0	0	0	3	5	0	0	0	0	2	2	0	0	0	0	0	0	0	0	0	0	0	0	0	0	0	0	0	0	0	0	0	0	0	0	0	0	0	0	0	0	0
ENSG00000184675	139285	AMER1	633	1076	514	283	413	886	1128	746	963	970	1230	1722	1218	891	1316	1384	552	408	668	1039	1103	803	900	1224	806	669	956	1129	844	639	985	1500	635	1246	994	977	1642	1153	1207	700	812	921	1087	812	673	582	1585
ENSG00000165566	219287	AMER2	0	0	0	1	0	0	0	0	0	0	0	0	0	0	0	0	0	0	0	0	0	0	0	0	0	0	0	0	0	0	0	0	0	1	0	0	0	0	0	3	1	0	0	0	2	0	0
ENSG00000178171	205147	AMER3	1	1	0	0	0	3	0	1	0	0	37	37	14	48	4	7	0	1	1	3	4	0	0	0	0	0	0	0	0	0	0	298	10	6	2	1	39	0	1	0	1	0	0	0	1	0	5
ENSG00000159461	267	AMFR	10044	15626	8393	6927	8779	16162	7315	8047	8582	9454	10570	13189	11282	10682	7072	7899	11301	11940	13645	7737	11968	5930	6235	10133	11026	9820	12463	7956	11184	11245	9376	13152	16492	17300	17081	14343	12142	13619	14815	10216	9526	6661	5336	8342	4610	7237	14117
ENSG00000104899	268	AMH	11	10	145	138	107	11	55	18	30	46	121	78	53	24	106	87	93	63	92	27	47	34	95	117	83	18	53	27	24	41	44	58	28	9	11	20	185	223	107	10	17	32	232	242	145	215	7
ENSG00000135409	269	AMHR2	0	0	1	2	0	2	0	0	0	2	0	0	0	3	2	0	2	0	1	0	1	2	0	0	1	2	0	0	0	0	0	1	0	0	0	0	4	1	0	0	1	0	1	0	4	2	0
ENSG00000181754	57463	AMIGO1	629	1568	14	11	15	583	124	500	358	464	417	419	354	224	619	351	884	837	1187	279	281	262	505	504	429	172	372	346	324	323	778	848	765	829	619	694	207	298	495	898	631	794	234	116	166	202	656
ENSG00000139211	347902	AMIGO2	1073	634	511	1134	548	277	188	149	86	64	45	121	254	206	56	47	1982	2034	680	110	467	1578	129	280	138	815	270	255	796	898	602	47	302	105	276	152	1271	1620	3381	101	385	133	2016	1949	1306	1687	141
ENSG00000176020	386724	AMIGO3	0	0	0	2	1	3	0	1	1	2	2	5	1	1	4	1	0	2	3	0	3	2	0	3	0	0	0	0	5	3	1	1	1	0	2	0	1	2	4	4	1	2	1	4	0	0	1
ENSG00000101935	9949	AMMECR1	2988	3394	2249	1874	2478	1679	3210	2231	1332	1468	1175	1365	1855	2896	2212	2589	574	1468	1357	2037	1960	1648	1466	1317	970	769	1952	1351	2349	1864	1243	3268	1372	2524	2641	2471	1614	4748	4441	1299	1407	885	2609	2256	1834	1335	3548
ENSG00000144233	83607	AMMECR1L	2431	3523	2535	2141	2230	2048	2242	1469	3175	3208	1739	2328	2382	2750	2126	2622	3615	3795	4817	2238	3105	2948	2511	2380	2379	1963	2609	2494	2028	2255	2392	2764	2910	3860	5484	3058	2078	3211	2783	2454	1700	2629	3079	2704	2827	2597	2826
ENSG00000166126	81693	AMN	4397	1795	2331	2654	2360	244	146	490	2171	1019	1555	2042	429	1662	227	1248	2035	1136	2884	211	350	351	872	780	7594	5160	4327	2551	950	1527	1059	717	839	109	108	90	2028	375	407	671	1122	219	2052	1499	1192	1305	1263
ENSG00000151743	196394	AMN1	712	1236	780	841	1385	790	597	808	507	614	427	296	413	1469	192	319	1256	1234	992	632	1241	3293	622	541	918	699	1578	720	183	368	951	716	699	866	960	677	1158	480	564	505	534	392	583	534	580	972	441
ENSG00000126016	154796	AMOT	3359	2839	340	270	212	1000	498	19	1540	816	1234	3005	3226	556	1500	5106	13	283	405	738	634	139	121	303	967	657	891	317	741	1070	2139	1355	1376	7415	14910	5220	779	3607	5290	1229	441	1509	2951	3070	1801	2720	410
ENSG00000166025	154810	AMOTL1	14	37	0	0	0	74	2620	0	647	678	0	0	29	1717	0	1	1057	2097	812	747	225	127	1320	1009	24	10	7	15	1	1	11	1	5	35	977	11	1440	126	264	172	31	253	7	1	0	1	1
ENSG00000114019	51421	AMOTL2	2178	3923	2336	2922	3323	2297	915	1373	5770	5140	3218	5981	7889	3026	2382	5961	3742	2636	1893	2840	3784	4114	2490	2023	2609	1848	1852	2089	1941	2730	1809	2544	2624	2200	4687	2489	2503	2372	2637	3891	2200	3107	3129	2876	2953	5027	1151
ENSG00000116748	270	AMPD1	0	0	0	0	0	2	1	5	1	2	0	1	3	5	0	0	1	0	1	2	0	1	2	0	0	2	0	3	3	4	2	1	2	0	0	0	2	0	3	1	7	1	0	0	0	0	1
ENSG00000116337	271	AMPD2	5311	4408	1403	792	1247	3358	1941	2838	3051	3221	2144	3238	2879	4594	2591	2076	4336	3459	5215	2511	3414	2601	3666	3179	4076	3019	3390	4432	3836	4195	3909	4140	5370	5353	3652	4338	3003	2978	3148	5267	5020	5170	2046	1620	1415	1743	4844
ENSG00000133805	272	AMPD3	105	65	165	218	159	219	333	93	132	163	133	255	149	134	777	239	241	489	618	58	88	37	566	278	156	175	124	123	260	178	60	250	209	563	556	773	166	254	472	549	220	246	94	96	43	62	390
ENSG00000078053	273	AMPH	0	0	0	2	0	0	0	0	0	0	0	0	0	0	0	0	0	0	0	1	0	0	0	0	0	0	0	0	0	0	0	0	0	0	0	0	0	0	0	0	0	0	0	0	0	0	0
ENSG00000145020	275	AMT	5	14	9	33	18	35	36	39	43	44	128	79	78	66	10	23	16	11	0	22	43	12	87	76	27	22	53	87	7	3	59	49	71	40	52	42	61	17	14	37	96	75	2	2	0	13	106
ENSG00000187689	401138	AMTN	0	0	0	0	0	0	0	0	0	0	1	0	0	0	0	0	0	0	0	0	0	0	0	0	0	0	0	0	0	0	0	0	0	0	0	0	0	0	0	0	0	0	0	0	0	0	0
ENSG00000237763	128966568	AMY1A	0	1	0	1	0	0	1	4	1	2	1	0	1	0	0	0	1	1	0	1	0	0	1	1	2	2	3	0	1	0	0	0	2	0	0	0	1	0	1	0	2	0	2	1	1	0	4
ENSG00000174876	277	AMY1B	0	0	0	0	0	0	0	0	0	0	0	0	0	0	0	0	0	0	0	0	0	0	0	0	0	0	0	0	0	0	0	0	0	0	0	0	0	0	0	0	0	0	0	0	0	0	0
ENSG00000187733	128966568	AMY1C	0	0	0	0	0	0	0	0	0	0	0	0	0	0	0	0	0	0	0	0	0	0	0	0	0	0	0	0	0	0	0	0	0	0	0	0	0	0	0	0	0	0	0	0	0	0	0
ENSG00000243480	279	AMY2A	0	0	0	0	0	0	0	0	0	0	0	0	0	0	0	0	0	0	0	0	0	0	0	0	0	0	0	0	0	0	0	0	0	0	0	0	0	0	0	0	0	0	0	0	0	0	0
ENSG00000240038	280	AMY2B	33	52	44	81	76	171	29	28	185	210	15	59	332	66	17	65	16	14	10	6	17	2	18	10	27	37	48	32	19	23	59	20	19	111	131	113	21	32	92	15	680	337	1	13	4	7	43
ENSG00000174945	155185	AMZ1	23	5	7	0	0	0	43	17	6	3	0	1	2	27	24	22	2	3	2	9	99	273	29	21	7	8	6	7	5	12	5	16	4	5	31	30	1	2	1	23	36	1	5	3	6	4	5
ENSG00000196704	51321	AMZ2	1752	3796	2329	1709	2214	2631	3036	3395	3096	4234	2707	3189	3135	2897	1531	2202	2083	3050	3537	2167	2806	2164	3744	3864	3203	1543	2858	2108	1111	2086	3872	5059	4158	3625	3712	3285	2168	3687	3919	3304	3379	2252	3086	2567	3111	2898	2154
ENSG00000153107	64682	ANAPC1	5622	4997	10073	5224	6937	6704	7277	6660	7682	7936	7584	8247	5498	11721	7931	6884	8839	8345	12867	7779	6906	5822	9402	10426	5774	4215	7595	6176	8873	8404	5788	11312	9655	8748	7134	7872	6238	11671	7048	8609	4300	10359	8957	7165	6755	5072	11529
ENSG00000164162	10393	ANAPC10	567	587	529	513	587	267	621	371	394	486	234	453	383	616	426	489	469	364	574	357	468	469	802	734	529	418	687	496	584	640	436	631	587	279	347	363	559	502	451	352	695	395	611	418	713	593	572
ENSG00000141552	51529	ANAPC11	1856	2483	3358	2681	3315	2627	5368	4923	5065	6487	2825	2456	4248	5836	2171	2115	3421	3236	4404	3627	4626	4756	5055	5600	6273	3941	7439	4443	1767	1747	5896	5309	4228	2967	2863	2341	2532	3110	2868	3182	3346	2720	7337	6336	7001	6242	3869
ENSG00000129055	25847	ANAPC13	2676	2709	1692	1206	1629	2989	3517	2399	2415	2712	2349	3632	3357	5269	2822	2676	1748	1735	3271	1412	2546	1914	3040	2971	3316	2096	3683	2561	2433	2533	2179	2888	2898	4043	3486	3601	3569	2225	2897	2892	2952	2068	4035	3473	3156	3200	3558
ENSG00000110200	25906	ANAPC15	1322	979	1221	673	1076	739	1460	1425	1154	1269	1240	1527	945	2300	823	988	437	896	1205	867	790	573	1610	1991	1110	476	1760	684	1294	1044	854	2385	1621	1030	1079	828	1287	965	980	1183	438	820	1373	1331	975	787	1628
ENSG00000166295	119504	ANAPC16	11765	13016	5059	6658	5927	4418	5724	5680	6073	6054	6631	5791	6964	4299	3431	4812	6108	5426	5762	4837	6711	5733	7780	6768	7062	4015	7129	6551	5700	6746	6144	5368	5216	7116	7899	7497	10693	4296	5258	5771	5786	5250	7209	5374	6056	5633	4885
ENSG00000176248	29882	ANAPC2	2367	2048	1652	914	1489	1304	2228	840	2025	1925	1379	1457	2047	2440	1769	2812	2209	1675	3069	1254	1308	1133	2091	2323	2731	1278	2104	2499	2374	1972	2340	1703	2055	1429	1562	1218	1186	1878	1980	1698	1312	2024	2179	1813	1519	1229	1999
ENSG00000053900	29945	ANAPC4	2308	2720	2192	1421	1736	1108	1829	1301	1604	2038	1064	1874	1049	1657	1232	1511	1401	1586	1908	1243	1180	999	2323	2083	1362	966	2000	1581	2269	2295	1087	1969	1680	941	1110	1121	1344	2323	2100	1907	1894	1556	1078	685	804	671	2017
ENSG00000089053	51433	ANAPC5	7326	6419	13074	11975	11196	9507	6745	9896	8916	8821	10914	10521	9486	15796	7091	7579	8086	9439	11835	13648	12828	8947	16048	12490	10354	4825	13051	9480	9179	9951	7025	13826	11252	10793	10178	8890	13452	21016	20780	10543	12733	7265	13782	10768	9870	6126	12751
ENSG00000196510	51434	ANAPC7	3360	3156	3642	2631	2858	3497	2852	3001	2763	2843	3425	3427	2953	7260	2956	2563	3832	4142	5966	4248	3556	3148	5561	4413	2983	1762	4857	3047	4320	4191	2496	5369	4598	3375	2938	2855	3764	6113	4671	3492	3220	3071	5605	4616	4369	2833	4874
ENSG00000214274	283	ANG	1033	214	272	1044	413	78	185	294	381	403	121	51	602	369	217	143	162	72	233	295	903	1029	115	102	779	540	313	432	229	279	112	158	93	43	24	30	194	336	338	51	502	217	486	252	384	538	92
ENSG00000013523	23357	ANGEL1	2072	2322	1195	799	1032	2522	2989	1087	2293	2881	2510	2275	2928	1769	2124	1731	1356	1151	1383	1703	2191	1262	2027	2554	2406	1382	2973	3320	2735	2414	6349	1813	1357	2990	2665	2240	1986	2200	2410	2265	1295	3004	3278	2188	2331	2379	2649
ENSG00000174606	90806	ANGEL2	1878	2877	1542	1247	1338	1808	1890	1254	2145	2170	1539	1780	2154	2185	2243	1622	2689	1371	3458	1155	1571	1458	3688	2238	1688	1632	2181	2359	2199	2009	1809	1869	2275	2632	2295	2569	1406	1928	2426	1949	2263	2058	3088	2469	2379	2243	1835
ENSG00000154188	284	ANGPT1	0	7	0	1	17	0	316	79	0	0	5	5	0	469	8	2	3135	2529	3460	0	0	1	0	0	0	0	0	0	1	0	1	0	2	0	69	0	0	4	0	1	2	0	45	21	17	30	13
ENSG00000091879	285	ANGPT2	0	1	0	0	0	0	1	0	0	0	0	0	1	0	1	2	0	63	68	1	0	0	1	0	0	0	0	15	16	147	0	3	0	0	8	33	47	3	108	1	0	2	5	6	0	4	0
ENSG00000101280	51378	ANGPT4	0	3	0	1	0	0	0	0	3	2	1	0	2	1	0	0	0	0	0	1	12	1	0	4	2	0	0	5	0	0	0	2	2	1	0	1	0	0	0	0	0	0	0	0	1	0	0
ENSG00000116194	9068	ANGPTL1	0	0	0	0	0	0	0	0	0	0	0	0	0	4	0	0	0	0	1	0	1	0	1	0	0	0	0	0	0	0	0	0	0	0	0	0	0	0	2	0	0	0	0	0	0	1	0
ENSG00000136859	23452	ANGPTL2	0	0	1	0	0	0	3	0	1	0	0	0	0	2	0	0	0	0	0	0	0	0	0	0	1	0	0	1	0	0	0	0	0	0	0	0	0	0	0	0	0	0	0	1	0	0	0
ENSG00000132855	27329	ANGPTL3	0	0	0	0	0	0	0	0	0	0	0	3	0	0	0	0	0	0	4	0	3	0	0	0	0	1	0	0	0	0	0	0	0	0	0	0	0	0	0	1	0	3	0	0	0	0	6
ENSG00000167772	51129	ANGPTL4	145	113	1605	3604	2701	22	17	118	1111	1133	80	325	306	90	147	255	466	446	139	13	318	182	2	79	1366	2182	193	812	33	71	209	7	23	13	11	16	47	149	121	154	344	410	39	33	64	57	21
ENSG00000187151	253935	ANGPTL5	16	1	0	0	0	0	1	0	0	0	1	0	0	0	0	0	0	0	0	0	0	1	0	0	0	0	0	0	1	0	0	0	0	1	0	2	0	0	0	0	1	0	0	0	0	0	2
ENSG00000130812	83854	ANGPTL6	28	13	27	2	27	21	13	25	3	3	151	76	10	2	2	14	24	20	31	3	4	16	9	17	5	2	1	4	23	11	16	55	25	11	35	19	37	6	17	19	15	4	1	3	5	1	67
ENSG00000171819	10218	ANGPTL7	0	0	0	0	0	0	0	0	0	0	0	0	0	0	0	0	0	2	0	0	0	0	0	0	0	0	0	0	0	0	0	0	0	0	0	0	0	0	0	0	0	0	0	0	0	1	0
ENSG00000130173	55908	ANGPTL8	1	0	0	0	0	0	0	0	0	0	0	0	0	0	0	0	0	1	1	0	1	0	1	1	2	0	0	0	0	0	1	0	0	0	2	0	0	0	0	0	0	0	0	0	0	1	0
ENSG00000227059	647589	ANHX	0	0	0	0	0	0	0	0	0	0	0	0	0	0	0	0	0	0	0	0	0	0	0	0	0	0	0	0	0	0	0	0	0	0	0	0	0	0	0	0	0	0	0	0	0	0	0
ENSG00000029534	286	ANK1	137	94	27	14	45	13	17	2	8	17	21	19	44	23	4	39	10	11	19	3	13	5	23	1	14	4	4	8	4	20	3	51	36	19	9	1	39	137	173	11	71	57	12	85	2	11	15
ENSG00000145362	287	ANK2	11	4	17	25	22	68	6	142	3	7	4	12	25	434	15	11	4	2	6	22	16	45	117	19	14	10	4	13	6	205	1	77	46	8	24	12	232	2	2	128	349	20	585	90	429	210	10
ENSG00000151150	288	ANK3	2149	2237	1221	2879	2364	988	1623	1981	2026	2321	1643	2510	3004	1998	2211	2059	1480	1330	1287	1275	1391	1179	1860	1519	3338	3487	2570	2462	1747	1761	1409	1948	2547	1520	1801	1356	1053	1253	2323	2390	2592	1076	3938	1840	2648	2944	1468
ENSG00000151687	150709	ANKAR	218	271	115	97	135	120	138	93	258	246	66	134	133	129	118	300	176	100	196	66	176	74	121	99	203	126	151	161	96	141	65	120	95	288	443	332	128	112	150	197	121	182	255	197	284	288	177
ENSG00000166839	348094	ANKDD1A	0	0	7	49	19	3	19	4	39	38	12	20	13	42	53	58	75	59	57	17	35	10	169	109	28	5	9	14	4	4	2	53	47	8	38	22	88	12	10	27	8	13	33	28	70	94	16
ENSG00000189045	728780	ANKDD1B	27	35	23	64	63	74	23	351	133	95	96	242	48	239	24	167	14	11	21	29	46	8	53	61	530	349	364	139	37	87	61	151	108	16	14	17	99	110	70	139	175	30	76	57	51	71	253
ENSG00000132623	63926	ANKEF1	2989	2865	1718	756	1269	1105	1426	580	2678	3242	1233	2021	1823	3794	2472	2033	782	1689	3024	1684	2229	1367	1754	2516	2414	1582	2045	1129	957	657	2903	1380	1010	1491	237	1284	2208	754	799	1029	894	622	2617	1628	2189	1609	1653
ENSG00000153930	162282	ANKFN1	48	27	5	16	8	13	0	4	100	156	12	91	35	27	3	3	0	1	16	4	7	0	0	10	5	2	3	9	7	14	3	4	1	44	57	12	5	10	2	41	12	14	6	13	10	6	15
ENSG00000185722	51479	ANKFY1	3580	2333	3680	2160	3212	1747	2188	1810	2820	2993	2665	3893	2356	2927	2772	3450	3549	4913	5398	2314	1782	1948	2664	2401	2028	1331	2799	1961	2815	1866	1432	2895	3097	2142	2648	2234	2245	4261	4626	2973	3401	1666	3296	2486	2349	1912	3178
ENSG00000154122	56172	ANKH	8132	10807	4520	4913	5258	2353	5154	5851	4917	4832	3823	3514	8178	4709	5820	3928	3202	3285	3519	3830	4477	3640	5762	5778	5114	3718	4556	2100	2484	2042	4130	14825	21219	4291	6406	4816	4781	4848	3929	3256	6049	5893	3178	1763	2376	1988	13573
ENSG00000131503	54882	ANKHD1	422	366	396	477	460	281	450	431	523	532	295	258	532	606	274	381	621	526	567	487	1013	1055	649	592	429	471	319	420	327	497	462	469	686	273	376	348	247	627	407	284	1097	416	590	357	473	378	333
ENSG00000254996	404734	ANKHD1-EIF4EBP3	75	59	85	84	116	79	141	65	73	81	45	87	80	99	73	97	94	104	106	112	113	56	179	77	81	140	49	99	71	67	88	91	133	49	84	103	54	213	158	85	256	79	117	77	80	51	61
ENSG00000001629	54467	ANKIB1	4435	4920	4145	4260	3854	4350	3431	5409	5325	4837	3358	7281	3402	4275	4708	2533	6596	5646	6249	3718	5617	5354	5663	4926	5277	4672	5465	4407	5018	6247	4356	4972	5546	5527	5276	5048	3177	4324	5858	3764	5350	3788	6594	4032	5603	5520	4688
ENSG00000170209	255239	ANKK1	6	22	5	2	4	13	24	0	17	20	19	25	28	7	16	12	10	4	3	7	6	3	4	10	20	12	7	8	1	5	18	4	2	38	23	9	5	5	32	16	8	24	6	3	2	6	19
ENSG00000160117	126549	ANKLE1	6	5	14	19	11	141	9	7	26	37	93	29	45	67	25	42	15	8	14	5	8	15	200	151	476	186	391	368	425	156	11	34	27	12	24	7	29	7	9	3	20	25	2	3	4	11	10
ENSG00000176915	23141	ANKLE2	3076	3018	4745	6221	4427	3945	3826	4417	5263	5620	2976	3583	4766	6665	4704	3806	6550	6986	7451	6653	6504	6189	8499	6685	5259	3747	5879	4773	7048	6760	4253	6947	7231	5283	6391	4856	4719	6606	6589	3922	5781	4482	8025	5859	7258	5330	5728
ENSG00000144504	51281	ANKMY1	875	979	1193	831	966	705	666	747	1468	1389	896	663	1193	713	810	1043	1415	815	976	710	1010	952	1574	1202	1337	1306	838	1154	827	931	1104	1117	1156	817	1153	1117	714	1407	939	696	562	551	1399	1213	1617	1444	851
ENSG00000106524	57037	ANKMY2	2789	3108	2483	2142	2381	1880	1076	2449	2372	2215	2347	3775	2935	3070	1716	1989	1772	2601	2826	4690	5535	4720	1671	2030	3413	1901	2971	2190	3550	2632	1995	2183	2869	3327	2398	1585	1474	3924	3940	2143	1753	555	6268	4064	6791	4780	2714
ENSG00000164331	57763	ANKRA2	764	846	800	1437	1140	1220	574	829	1535	1580	595	744	972	774	596	537	898	458	608	624	1628	1778	694	604	1238	675	787	933	410	988	862	503	1150	940	1085	781	1094	1305	1219	717	1835	1060	675	342	607	929	491
ENSG00000148677	27063	ANKRD1	0	3	9	4	80	18	0	4	13	54	0	42	2	292	166	8	2	689	72	0	4	1	10	0	0	2	1	0	0	0	0	0	0	59	36	8	5	61	43	129	0	0	2	0	0	37	1
ENSG00000088448	55608	ANKRD10	11604	6779	3397	3939	3756	3534	14495	3004	4532	5064	3776	3992	7570	3771	2533	8563	3063	2203	2247	4181	7323	5322	10077	6912	3910	2832	2884	4784	7785	7536	5266	5262	4634	4490	5712	6757	6316	3762	3913	5819	9646	6372	4731	2658	3024	4284	2742
ENSG00000167522	29123	ANKRD11	5809	5652	4382	4644	3721	3002	2976	3746	3247	3260	2932	2679	4113	4333	1962	2569	3340	3474	2806	3091	4564	2953	3891	4456	3628	3132	4287	3106	3667	4506	3806	5700	4854	2170	4003	2560	4105	4672	4591	2551	7206	2966	2742	3921	2053	3285	4354
ENSG00000101745	23253	ANKRD12	1716	2397	1757	1942	1786	850	1373	1195	2320	2307	1191	1352	900	1296	1545	1692	5745	3479	4010	1469	2538	2762	2154	1563	1574	1509	1428	1362	879	859	2219	1372	2158	1444	2813	1590	1992	1041	1923	1080	1395	945	2905	1566	1989	2553	1288
ENSG00000076513	88455	ANKRD13A	3257	3348	1676	4302	1808	2082	1543	2438	2318	2070	2276	2115	3293	3239	1676	3212	2263	3235	2877	2757	3290	2457	2335	2559	2797	1537	2632	1902	3016	3165	1661	3477	3152	1587	2707	1446	3815	2310	2367	2252	3903	1905	2543	2198	1906	1398	3023
ENSG00000198720	124930	ANKRD13B	319	286	426	161	211	680	280	679	468	371	769	575	291	913	495	412	775	718	725	744	539	389	865	994	535	345	562	740	313	485	940	706	522	249	186	171	420	117	114	588	229	226	386	255	159	144	671
ENSG00000118454	81573	ANKRD13C	3074	3089	2670	3207	3421	1991	1416	2332	2260	2360	1407	2519	1393	2117	2035	2115	4745	4181	7299	1079	1258	1269	2358	2530	1748	2701	3292	1959	3289	3431	1725	2040	1960	2217	3695	1926	1521	1896	2195	3325	2488	2689	1440	1339	1072	1099	1956
ENSG00000172932	338692	ANKRD13D	828	1029	1471	1036	1101	1011	855	1576	1116	1226	1465	1331	872	1245	935	1301	2108	2402	2084	1566	2965	3470	2050	1736	1453	860	2132	1699	1506	1711	1379	1572	2454	1148	1420	966	1030	988	1075	1583	1523	1374	1545	1286	1665	1489	1123
ENSG00000134461	54522	ANKRD16	361	784	529	353	517	341	596	730	560	484	471	438	627	790	610	692	673	752	1111	1186	1757	941	957	789	777	457	736	854	605	673	700	674	580	322	388	286	715	518	552	549	373	551	837	652	501	451	418
ENSG00000132466	26057	ANKRD17	8355	6877	7803	6801	7217	4694	8512	3850	6234	7933	3870	6232	5304	6810	6035	7008	5159	5354	6629	4619	5811	5079	7846	6710	6447	6272	8289	7727	6664	6888	4570	5677	6185	6018	5832	6573	5945	9224	9006	5952	12095	9128	8491	5990	7028	6573	9925
ENSG00000180071	253650	ANKRD18A	96	358	232	212	175	29	3	2	10	20	108	30	97	4	19	129	0	0	0	0	2	0	70	36	564	391	233	96	264	177	0	472	50	122	235	227	118	347	521	86	42	507	475	291	302	266	111
ENSG00000230453	441459	ANKRD18B	16	10	0	1	0	0	1	3	0	3	121	75	3	42	312	114	1	0	1	2	0	1	15	21	205	115	243	126	3	0	0	78	16	2	4	1	1	1	1	84	104	290	1	0	4	0	5
ENSG00000165887	26287	ANKRD2	1	8	2	2	3	6	4	8	26	11	2	2	57	1	10	91	25	6	4	7	11	21	4	3	8	25	19	3	2	1	2	4	6	4	7	7	4	3	11	10	4	4	2	3	2	15	9
ENSG00000260691	128966611	ANKRD20A1	0	0	0	0	0	0	0	0	1	5	5	1	0	0	0	0	0	0	2	3	1	2	0	0	7	0	0	1	0	0	0	7	5	1	3	3	0	1	0	0	14	5	4	2	2	6	4
ENSG00000152766	118932	ANKRD22	7136	7507	3982	4953	7068	2571	1988	5913	8407	8000	924	3004	1161	1822	891	2004	1107	2442	266	2102	4676	2886	7289	3071	3965	3800	4289	1735	3790	5752	3939	2726	4457	1184	1468	2360	655	4572	4779	6371	2261	3715	2375	3073	1747	2257	3973
ENSG00000163126	200539	ANKRD23	30	55	18	16	22	33	33	24	39	40	42	79	87	19	58	74	78	59	44	45	73	26	55	49	65	70	46	61	39	52	73	63	55	70	159	100	25	53	48	53	40	53	29	21	37	41	37
ENSG00000089847	170961	ANKRD24	199	128	16	41	45	47	56	78	55	41	84	50	86	54	20	81	63	111	52	40	99	66	13	32	190	128	103	93	11	20	179	133	33	19	45	14	101	18	10	42	212	23	18	19	8	41	15
ENSG00000107890	22852	ANKRD26	607	943	1112	821	816	884	1545	1174	1207	1309	1415	1583	1759	1130	1503	1674	1970	2875	2354	2110	2719	1373	2292	2216	1776	1208	1619	2094	1215	1257	1261	1929	2039	808	1549	736	2241	1178	1482	1129	1296	884	2594	1921	2010	2011	825
ENSG00000105186	84079	ANKRD27	3591	5499	3943	3707	4011	5952	4540	4432	10487	10631	4496	4358	7330	6369	5053	3340	7504	5694	10868	4750	6776	6372	10270	9838	5904	4483	4463	7594	4372	6167	5074	8889	7186	4427	4777	3403	4673	3765	3404	4751	5357	5110	5808	4952	4591	5427	6173
ENSG00000206560	23243	ANKRD28	2259	2258	4593	3673	4899	3780	3830	4869	4935	5137	5591	6143	3086	4126	4757	3999	4175	3704	2859	3540	3921	2670	5620	6533	4958	3905	6661	4697	4624	5235	3311	6744	6320	4057	5001	3947	5079	5302	5035	4400	6467	4582	4048	3171	3033	2615	5743
ENSG00000154065	147463	ANKRD29	322	1155	16	27	15	189	109	443	365	414	190	145	9	204	325	806	2643	1787	1698	88	218	223	828	113	41	165	53	9	134	226	232	74	125	269	600	273	3	86	64	777	250	70	396	216	433	755	36
ENSG00000148513	91074	ANKRD30A	0	5	0	0	0	0	0	2	0	0	0	0	0	617	0	0	0	4	1	1	0	0	0	0	2	1	5	0	0	0	0	0	0	0	0	0	0	0	0	0	1	1	0	1	0	1	1
ENSG00000180777	374860	ANKRD30B	1	0	287	220	165	3	1	1	0	0	0	0	2	14	1	4	27	69	1380	1	0	0	1	0	2271	404	1503	2732	0	0	1	0	0	0	0	2	0	0	1	0	0	46	129	48	362	296	29
ENSG00000163046	554226	ANKRD30BL	0	0	0	0	0	0	0	0	0	4	0	0	0	0	0	0	0	0	0	0	1	0	6	0	0	0	0	0	2	3	0	0	0	0	1	0	0	0	2	0	0	2	0	1	0	0	1
ENSG00000145700	256006	ANKRD31	17	16	32	1	11	37	46	11	21	33	10	20	31	38	33	15	21	31	23	32	42	14	24	19	45	27	16	47	33	52	8	24	30	20	34	32	20	20	36	23	18	35	137	129	117	129	42
ENSG00000167612	341405	ANKRD33	5	12	0	0	0	14	11	3	13	21	9	0	11	5	14	5	8	5	5	4	24	62	72	26	28	4	6	9	4	4	13	8	5	8	15	22	17	2	6	18	12	4	0	6	2	2	3
ENSG00000164236	651746	ANKRD33B	0	0	0	1	1	2	181	4	0	6	82	63	4	6	740	1051	6	26	7	30	17	28	84	60	60	15	32	16	5	35	5	183	29	0	5	6	5	17	0	13	9	8	5	5	7	7	32
ENSG00000272031	284615	ANKRD34A	28	16	11	4	17	13	7	5	12	11	11	19	15	6	17	6	36	23	34	7	21	35	24	15	31	23	24	42	20	26	35	20	0	25	32	31	12	17	27	42	16	19	86	58	81	105	17
ENSG00000189127	340120	ANKRD34B	0	0	0	0	0	0	0	0	0	0	3	2	1	1	48	62	0	0	0	0	3	0	0	1	0	1	1	3	0	2	0	0	8	0	5	0	0	0	0	8	0	15	0	0	0	0	0
ENSG00000235711	390616	ANKRD34C	0	3	0	0	0	0	0	0	0	1	0	0	0	2	0	0	1	0	0	0	0	0	0	0	0	0	0	0	0	0	0	0	3	9	5	3	1	0	0	1	0	0	1	0	2	0	0
ENSG00000198483	148741	ANKRD35	2	1	1	0	0	2	0	0	0	0	0	0	0	0	2	0	3	1	0	1	0	0	2	0	1	2	1	0	1	3	0	2	0	2	2	2	1	0	2	2	3	0	0	0	1	0	0
ENSG00000135976	375248	ANKRD36	325	577	599	484	466	360	755	636	1421	1468	555	572	1042	451	780	1082	1640	954	938	542	943	906	1157	1395	1269	1194	805	1467	425	616	817	661	556	625	2050	779	393	975	798	742	453	1255	1052	594	816	835	734
ENSG00000196912	57730	ANKRD36B	245	389	378	395	315	307	349	390	528	562	254	360	465	212	363	628	750	442	429	361	546	447	529	561	691	559	483	701	428	513	391	555	584	392	920	398	282	451	342	277	450	525	474	320	384	396	385
ENSG00000174501	400986	ANKRD36C	516	661	571	704	654	437	821	611	785	1101	574	770	1003	365	1019	1168	1439	748	764	629	867	846	898	1046	1057	1032	757	1265	588	758	658	774	746	627	1264	645	534	963	966	649	591	1150	1017	589	842	899	596
ENSG00000186352	353322	ANKRD37	101	140	1291	2755	918	75	338	472	554	476	84	72	327	91	102	260	104	124	81	34	489	224	260	322	580	2136	52	834	104	158	288	115	39	145	99	164	103	260	140	52	626	208	194	120	272	251	46
ENSG00000213337	51239	ANKRD39	612	471	942	350	515	395	656	610	711	695	426	482	693	920	801	656	792	1187	1464	762	877	1166	807	746	667	402	750	531	693	720	456	1057	876	905	1426	935	402	973	575	810	291	412	748	766	772	544	682
ENSG00000154945	91369	ANKRD40	2117	3616	2865	2373	2839	3047	3360	3724	3245	4108	2625	2085	3326	5692	2563	1957	6992	5743	7698	3443	3921	3954	4760	4397	4549	3365	6360	4155	2728	2780	4400	4732	3700	2585	2885	2409	2850	3162	3137	2705	2371	2616	6059	5292	5372	5104	3272
ENSG00000167117	55018	ANKRD40CL	1390	1983	508	1538	969	616	1011	1097	2840	2421	617	1411	1764	1788	424	499	260	277	239	1284	2698	3237	327	1079	1847	676	651	336	302	465	1869	869	789	527	492	230	1058	167	88	1028	1254	282	522	412	599	673	220
ENSG00000137494	338699	ANKRD42	978	834	409	336	374	650	281	627	580	482	555	721	291	635	421	352	783	1024	1139	385	392	407	716	652	556	290	612	438	600	621	556	864	762	777	769	530	510	535	634	1024	672	505	515	385	444	349	613
ENSG00000065413	91526	ANKRD44	108	122	83	118	117	196	139	75	29	94	49	219	350	61	482	369	171	88	121	175	131	90	133	184	75	104	80	125	57	92	34	247	129	280	119	377	40	186	209	95	195	378	134	123	101	186	786
ENSG00000183831	339416	ANKRD45	0	0	15	7	42	1	23	0	1	1	0	8	0	2	0	0	0	2	2	0	1	0	12	7	1	3	1	0	0	0	0	0	1	0	546	0	0	0	0	0	0	0	0	0	2	0	0
ENSG00000186106	157567	ANKRD46	4278	3669	1175	953	1046	2316	1257	1516	1394	1177	1437	2152	2053	3441	1784	2365	1293	1365	1985	4837	7026	5104	1884	2506	3187	1897	2607	3181	2321	2408	2456	1435	1773	2353	2574	1750	5460	1374	1712	2109	1790	1116	1703	1042	1550	1303	5495
ENSG00000168876	54851	ANKRD49	1125	1398	586	673	692	958	956	1250	1269	1315	1118	1625	1184	1523	616	841	1023	902	717	727	1451	1213	931	1528	1293	575	1351	1137	892	1007	1380	1527	1568	991	1328	677	1177	636	751	1028	1605	729	851	790	716	870	934
ENSG00000151458	57182	ANKRD50	359	136	1114	1279	1480	805	1337	770	1341	1753	470	1292	1432	1004	1108	1111	625	667	802	720	1500	1229	1439	892	1459	1575	1405	1362	1490	1768	394	1128	1370	422	476	510	1142	2229	3297	629	1978	2519	1865	1164	1789	1842	2055
ENSG00000139645	283373	ANKRD52	1440	1399	1504	1493	1201	950	1978	1160	1746	2001	899	1067	1208	2339	2518	1050	1665	2434	2283	1371	1642	1601	1867	1566	1608	1716	2264	1323	1767	1892	1679	1342	1407	1518	1732	1915	1359	3508	4338	1892	3012	1895	3447	2023	2078	1196	1843
ENSG00000144031	79998	ANKRD53	0	2	1	0	0	1	4	0	1	0	1	0	2	1	2	0	0	1	3	0	0	0	5	4	0	0	0	0	1	0	0	0	1	3	2	1	1	0	3	1	2	0	1	5	7	2	0
ENSG00000100124	129138	ANKRD54	1727	1808	1218	608	881	523	1282	1450	689	942	724	1096	810	1358	776	904	926	1238	1485	720	1040	768	2207	1621	657	534	1054	857	1245	1254	781	1082	1039	725	741	702	691	1306	1252	692	1232	757	761	647	570	538	1099
ENSG00000164512	79722	ANKRD55	0	0	0	0	0	0	1	0	0	0	0	0	0	0	0	0	0	0	0	0	2	0	0	0	0	0	0	0	0	1	0	0	0	0	0	1	0	0	0	0	0	0	3	2	0	0	1
ENSG00000135299	22881	ANKRD6	0	1	0	0	0	11	6	108	25	16	164	175	31	51	43	77	0	12	6	251	431	372	306	151	64	8	10	21	18	88	4	10	67	45	110	18	12	33	49	289	39	74	14	4	38	17	4
ENSG00000124227	140731	ANKRD60	2	0	0	0	0	0	1	0	3	0	0	0	0	0	0	0	0	0	0	0	0	0	0	1	0	0	0	0	0	0	0	1	1	1	0	0	0	0	0	0	0	0	0	0	0	0	0
ENSG00000157999	100310846	ANKRD61	16	18	10	6	4	4	9	7	4	3	7	8	6	8	10	5	4	4	6	21	22	34	20	8	9	7	11	9	23	13	17	18	11	4	10	8	9	18	5	8	2	0	17	17	33	33	5
ENSG00000181626	342850	ANKRD62	0	0	4	6	6	0	3	3	0	0	0	1	13	2	15	3	3	2	2	7	12	14	2	1	1	0	4	0	1	6	0	0	0	9	12	8	1	0	1	0	11	0	72	31	43	46	0
ENSG00000230778	100131244	ANKRD63	0	0	10	5	6	0	2	0	0	0	11	2	1	7	13	8	5	4	10	0	0	0	1	7	20	6	3	12	4	2	0	2	2	0	0	0	3	2	0	2	1	0	16	10	10	13	38
ENSG00000235098	441869	ANKRD65	6	5	3	0	2	1	6	2	7	8	9	2	17	8	10	43	0	1	0	5	17	9	26	11	4	4	4	2	1	10	1	8	6	1	5	5	21	0	4	13	5	12	1	14	6	3	20
ENSG00000230062	100287718	ANKRD66	0	0	0	0	0	0	1	0	0	0	0	0	1	0	0	0	0	0	0	3	0	4	0	0	0	0	1	0	0	0	0	0	0	0	0	0	0	0	0	0	0	0	0	0	0	1	1
ENSG00000106013	56311	ANKRD7	0	0	0	1	1	2	40	0	0	1	0	0	1	1	0	0	3	8	21	15	3	2	21	13	2	1	7	2	2	1	0	0	0	0	0	0	2	0	0	0	3	0	0	0	0	3	0
ENSG00000156381	122416	ANKRD9	2838	1908	3350	3440	3854	1410	2259	3329	13271	9150	1960	2831	5084	5145	3095	9110	1943	1931	2611	1810	2828	1984	2381	3296	9848	13259	4774	3294	1649	2638	1555	2757	2669	1149	1838	778	2444	2517	3101	1435	3106	2276	5255	3847	3994	4176	2899
ENSG00000064999	23294	ANKS1A	2550	2201	3457	2330	2625	3579	2914	4875	2894	2728	3233	3867	3173	3382	2463	3420	5958	5552	5284	3213	3781	3506	4556	5019	2574	2190	5569	4248	4053	3320	2426	4223	4919	3068	3804	3307	4115	2607	2732	3245	5727	3012	1913	1537	2943	2398	5900
ENSG00000185046	56899	ANKS1B	0	0	1	0	4	0	1	2	3	1	0	1	6	1	3	2	2	2	2	0	1	1	2	0	1	0	0	0	3	0	0	2	6	1	20	1	0	2	1	7	8	4	40	9	23	20	0
ENSG00000168096	124401	ANKS3	1071	1489	672	521	680	955	624	535	674	922	689	583	1084	771	521	709	1061	1095	740	790	1240	883	994	1023	923	522	1130	1013	862	1170	821	721	1385	744	823	626	543	1096	984	613	1571	802	472	627	470	597	1529
ENSG00000175311	257629	ANKS4B	5394	3442	3882	5326	4473	2187	3082	2630	2122	2592	1188	2465	5194	3585	1238	1588	1871	2128	3501	1673	2905	1995	915	3757	7281	3531	4499	3350	2499	1473	3162	4319	4043	1468	1145	1464	4282	2123	1911	1791	5404	2894	2135	1799	1923	2323	4593
ENSG00000165138	203286	ANKS6	1419	3041	3433	1880	2401	2859	3065	1912	4833	4553	3184	1826	3602	4086	3351	3382	4388	2267	5046	3292	3212	2649	5077	4753	4269	2660	4118	4159	4389	4253	5915	4681	3853	2921	1652	2633	2303	3258	3214	3036	2426	2884	4582	2896	3434	2333	3185
ENSG00000206199	389161	ANKUB1	0	1	0	0	1	0	2	0	0	0	0	0	0	0	0	0	0	0	0	0	0	0	0	0	0	0	0	0	1	1	0	1	0	0	0	0	1	0	0	1	0	1	0	0	0	0	0
ENSG00000163516	55139	ANKZF1	2044	2275	2274	3446	2405	2253	1199	2442	4478	3705	2054	2806	3370	2439	2263	2885	4183	1906	2213	2093	6120	6889	2802	3368	5746	3584	1984	4417	1653	2142	2340	2543	2936	3073	3466	2068	1826	1889	1448	2986	2931	2475	1176	929	1182	1424	1730
ENSG00000011426	54443	ANLN	6705	4032	12751	8039	7846	1383	7669	12377	11471	14186	5781	7534	6003	21698	6445	4744	6113	4476	8222	10854	15836	27665	22313	13537	10731	6702	13525	7599	13731	10227	6681	15153	7463	1539	1042	2399	3577	13505	8747	2843	5434	2223	15628	12129	16663	12108	9628
ENSG00000131620	55107	ANO1	750	176	373	960	749	62	502	1	7	5	87	50	49	15	0	1	133	125	42	8	23	17	95	42	11	0	7	21	314	431	317	104	12	416	1060	1499	380	1021	1330	54	22	253	232	1196	37	196	7
ENSG00000160746	55129	ANO10	1017	1054	1330	2047	1313	2071	1554	2370	1829	1927	2290	2945	2467	1494	1305	1354	1685	2252	1790	1612	2091	1710	2198	2779	789	736	1369	654	1507	1940	1108	3093	4030	3971	5639	3075	1708	2186	2507	2843	3646	1654	966	833	1015	673	2325
ENSG00000047617	57101	ANO2	8	11	12	14	13	7	0	0	0	1	4	6	23	2	8	6	0	2	1	22	9	8	1	0	1	1	5	0	0	1	3	0	2	5	3	1	2	8	14	7	1	3	1	1	0	0	7
ENSG00000134343	63982	ANO3	54	12	0	0	2	1	0	0	0	0	0	9	1	3	0	0	12	251	107	0	0	0	0	0	0	0	0	0	1	1	0	0	0	1	13	0	0	0	0	5	0	0	9	0	0	9	0
ENSG00000151572	121601	ANO4	9	6	0	3	0	10	3	4	3	10	1	52	6	16	22	36	3	32	26	1	0	2	13	7	5	12	15	0	2	1	2	4	2	120	172	45	5	1	2	356	8	2	2	4	3	2	38
ENSG00000171714	203859	ANO5	0	0	0	0	0	0	0	0	0	0	3	12	0	8	0	0	271	459	791	0	0	0	0	8	9	20	4	6	0	0	0	0	0	0	11	2	6	0	0	18	94	892	1	2	0	0	3
ENSG00000177119	196527	ANO6	13305	11559	10143	33009	15096	9259	7155	9721	10817	9972	7658	6180	9996	12219	6410	5585	7177	3370	7886	11211	17901	15065	6125	7527	16601	17692	14011	10824	7151	8276	3955	9497	13469	7873	9302	6003	17809	10355	11564	6977	23501	6020	9811	6038	7544	7191	15648
ENSG00000146205	50636	ANO7	10	15	79	163	123	19	56	172	83	65	72	41	41	70	108	44	124	64	58	40	32	43	96	54	146	158	143	189	54	112	18	13	24	12	78	25	41	36	44	20	11	52	158	114	204	140	75
ENSG00000074855	57719	ANO8	562	743	283	413	412	284	305	468	489	478	465	359	419	118	447	545	1090	748	1004	368	561	794	562	256	422	314	542	359	439	592	497	348	340	363	824	334	307	447	556	223	480	592	231	220	141	188	298
ENSG00000185101	338440	ANO9	2640	2474	2487	3083	3317	2049	2120	3284	5458	5278	5085	6283	6051	4139	3690	3703	1869	1419	1114	4114	13790	7951	2413	4729	7718	3305	1783	4962	3062	4307	9455	5635	8392	2891	2696	2310	5197	1709	1365	5315	8288	2047	822	428	445	697	3720
ENSG00000011201	3730	ANOS1	13	2	3	2	7	4	0	2	0	0	3712	11	24	4	0	0	0	385	0	10	54	351	381	53	2	0	13	3	8	4	0	6	27	1966	1179	20	0	274	183	1	4	2731	4	2	1	3	376
ENSG00000140350	8125	ANP32A	6574	5573	7941	5407	5526	3043	5401	5770	5108	5004	4453	4288	3689	8296	5034	6304	3489	3977	6587	5830	6432	5334	6792	8129	5962	2719	6928	3322	3943	3262	3763	9246	5576	3907	4626	3264	4258	5529	4448	3652	5049	4408	11531	9048	8462	6547	7547
ENSG00000136938	10541	ANP32B	1386	997	1023	1200	748	574	1201	792	987	850	677	423	815	1206	827	1095	957	616	1216	612	575	691	1207	1612	1468	928	1679	975	1113	947	713	1282	1094	267	404	296	886	744	623	407	797	854	1597	966	939	912	1135
ENSG00000139223	23519	ANP32D	0	0	0	0	0	0	0	1	0	0	1	0	0	0	0	0	0	0	0	0	2	0	0	0	0	0	1	0	0	0	1	1	1	0	0	0	0	0	0	0	0	0	0	3	0	0	0
ENSG00000143401	81611	ANP32E	2417	2065	2325	1718	1885	1101	2458	1053	1747	1764	1348	1544	1421	1444	1479	2060	4007	1677	3695	2987	2792	2769	7405	4216	2042	1457	2909	2343	2673	2525	1082	2344	2292	980	1363	927	662	2079	2120	827	1514	2809	3149	2238	2462	2165	1082
ENSG00000166825	290	ANPEP	26	5	8163	12500	4901	9	17	89	11	5	10	9	44	773	2	219	23	91	334	22	365	16	42	169	26	11	73	3	21	6	74	80	37	24	138	57	98	6	3	674	1812	18	78	364	76	92	18
ENSG00000103254	65990	ANTKMT	1444	1584	1071	472	911	716	1480	890	845	908	899	605	589	692	928	784	967	1324	1371	965	863	594	896	827	1037	549	1642	717	1360	1368	957	1043	1242	1040	952	947	752	2079	1500	942	338	557	1282	2027	878	955	1348
ENSG00000169604	84168	ANTXR1	0	0	0	1	0	0	0	2	0	0	2	0	0	2	45	210	0	47	32	0	0	0	2	1	0	0	0	0	0	0	0	0	2	20	4	3	0	0	6	1	0	14	0	0	0	6	0
ENSG00000163297	118429	ANTXR2	6493	3392	4440	6968	4691	2061	3523	1394	1103	1354	684	1238	1441	2086	954	376	4909	4892	6830	730	1188	1210	5044	551	7381	7111	7750	4075	971	1301	1857	2582	2191	2103	2847	3073	3430	2578	5028	1244	6328	3946	5175	3755	4119	5871	2580
ENSG00000274209	195977	ANTXRL	0	0	0	0	0	0	0	0	2	2	1	4	0	8	0	2	3	4	0	0	1	0	0	0	4	4	2	1	0	2	0	0	0	3	0	1	0	0	0	1	1	0	0	0	0	0	0
ENSG00000135046	301	ANXA1	2401	23782	12949	10516	14667	4929	288	1711	3254	1896	3685	4281	15	5984	93	747	13207	18169	7204	663	665	1082	6503	1240	2641	3034	7077	252	4975	4319	2255	1336	657	1071	2055	231	151	9172	5385	5777	912	140	6512	7361	8533	8081	2521
ENSG00000109511	11199	ANXA10	71	76	1083	4	170	2	0	1	0	0	0	0	1	1	0	0	0	12	9	35	3	117	0	0	0	0	0	0	0	0	0	0	0	0	18	1	6	53	455	0	0	0	1696	4647	539	1029	1
ENSG00000122359	311	ANXA11	14790	12183	13643	12914	16443	5572	8531	9877	12715	12283	5373	8716	12378	9741	47111	31278	12962	15740	13960	7724	11423	9817	19646	13893	10647	8450	10038	8460	10477	10050	9666	8913	8779	9573	12757	12706	9416	11219	10511	12363	10065	8422	12421	10259	9538	10578	6039
ENSG00000104537	312	ANXA13	7040	6131	860	298	427	194	284	6	2	5	10	18	973	81	16	19	55	11	131	166	718	111	3	37	308	25	119	575	102	30	3961	35	18	272	302	372	407	56	76	374	197	453	58	68	59	121	89
ENSG00000182718	302	ANXA2	83885	87947	141674	89534	130239	34874	31408	42921	53488	62988	33863	38367	38462	56188	25641	38928	27873	51062	73460	40647	68473	89950	77342	38876	13946	18959	21064	8193	48234	37459	47604	73313	15858	57367	79624	56624	21392	92625	83653	59416	25070	54366	58808	66892	46053	42136	26703
ENSG00000177721	389289	ANXA2R	18	16	68	22	44	7	1	22	2	2	18	13	16	24	31	21	46	22	28	4	5	7	25	9	31	8	25	30	26	28	13	39	26	4	12	5	22	50	34	2	16	22	84	32	45	65	9
ENSG00000138772	306	ANXA3	17250	24941	8799	12483	9236	5666	2910	2606	9994	13843	4787	5844	4905	5594	2984	3085	2377	5785	5396	3456	6405	8213	16110	7372	4173	5703	5773	2303	8199	7247	9104	7472	2407	5870	12979	8017	3017	15099	11489	8048	10355	6622	3932	4958	4411	6062	2330
ENSG00000196975	307	ANXA4	15153	9123	8402	6764	8187	6907	8652	5613	9755	9071	6827	7576	7970	14299	6149	6085	5182	8526	7085	7249	8814	4803	5119	8096	6982	4502	7000	4383	9485	6712	8210	7282	6111	10295	17070	8786	5797	6176	7158	11515	5578	5509	12834	8235	10728	11452	9354
ENSG00000164111	308	ANXA5	2182	1301	6150	4349	4623	3451	7962	2860	1767	2926	2471	3702	2808	7889	1637	2061	2538	4751	4272	3155	4938	4316	5592	3324	1651	951	1118	1916	5683	7724	740	5287	5026	3593	3418	3356	6736	13531	16051	2314	7731	5402	9011	7647	8682	7338	3823
ENSG00000197043	309	ANXA6	924	2491	793	225	2135	4622	12142	20	610	1334	4479	2238	12398	3826	15766	3400	523	3667	785	697	3556	1881	11770	6449	37	12	34	378	1358	419	17894	544	492	19205	19924	20502	7657	2444	4172	8124	1107	7544	5673	3886	2966	7996	650
ENSG00000138279	310	ANXA7	5745	6433	8518	8998	9952	4594	5793	8154	5170	5668	7172	6942	6144	6653	4969	4389	10800	11306	13080	5772	8420	7776	12057	8861	8117	6435	12346	7156	8341	8866	4619	9094	7529	7027	9194	7268	8131	8187	8709	6680	6117	5434	9680	7895	7875	6519	6272
ENSG00000265190	653145	ANXA8	0	0	0	4	2	0	0	0	10	0	4	4	0	4	1	0	7	2	2	0	0	1	0	0	1	0	2	0	0	1	0	1	0	0	0	1	0	2	2	1	0	1	4	0	3	4	0
ENSG00000264230	728113	ANXA8L1	0	0	0	0	0	0	0	0	7	2	0	2	0	1	0	1	1	1	0	0	0	0	0	0	0	0	0	0	0	0	0	0	0	0	0	0	2	0	0	0	0	1	0	0	0	0	0
ENSG00000143412	8416	ANXA9	284	1050	332	269	419	775	765	260	1051	1155	976	1587	1012	182	2549	1410	1417	1107	1299	1549	1686	1073	909	1026	336	178	268	536	584	478	1157	559	1118	1090	1338	1473	495	333	713	3095	302	1520	514	336	445	635	200
ENSG00000136250	313	AOAH	2378	4447	1524	4727	3508	3445	2310	4764	5727	4102	3134	3550	3170	3763	1178	2327	2167	1808	1237	1266	1130	330	476	1203	8734	12943	6759	4001	1125	1573	3849	4416	3240	2031	851	2454	3908	636	852	1818	10945	1215	596	626	439	854	2333
ENSG00000002726	26	AOC1	26484	7234	6910	5421	6631	8766	7720	5553	13373	13654	6965	8272	5835	9021	11075	5149	5394	3951	3453	6415	12646	8681	5747	6162	9314	7390	7481	5271	7439	8671	10262	5150	7564	21589	21046	39909	6193	10325	11875	21209	5989	2140	10009	7701	10001	13075	3758
ENSG00000131480	314	AOC2	29	22	20	29	15	9	13	41	23	30	18	6	56	46	34	46	49	35	40	17	36	24	47	49	30	48	22	32	18	27	43	53	21	7	20	20	23	34	13	22	96	37	22	9	10	19	35
ENSG00000131471	8639	AOC3	3	1	0	4	3	1	5	8	17	4	3	7	10	16	7	3	10	13	11	3	10	15	18	11	9	6	8	11	2	13	5	12	6	2	10	6	6	4	2	7	20	1	3	1	12	12	1
ENSG00000148120	84909	AOPEP	2177	3723	1044	814	1129	878	2365	384	1801	2168	997	2266	1142	1513	2924	5311	553	593	884	509	459	322	2430	2090	1694	1520	1624	1081	2144	5145	1594	1020	1005	1696	2549	1482	1902	2840	2997	1744	929	2165	919	800	573	521	2221
ENSG00000138356	316	AOX1	212	127	7	36	8	47	29	68	323	110	17	117	155	392	91	531	60	82	33	44	67	35	16	90	262	292	99	123	17	29	54	20	98	192	730	59	41	5	1	375	115	7	11	13	32	50	55
ENSG00000138660	55435	AP1AR	5652	5036	3304	4662	3888	2375	3563	3182	1967	2108	1182	2974	1959	3970	1890	1787	3005	3769	2892	2437	4032	4840	3458	3484	3359	3175	4969	2732	3174	4248	2534	3586	3583	1489	2217	1821	4255	3149	2784	2377	5311	2788	3424	2762	3274	4160	3245
ENSG00000100280	162	AP1B1	13823	12225	15941	9820	16605	5883	8693	9639	6449	7075	7674	6695	5804	11165	5866	6753	6091	13689	12015	7525	8861	6742	13597	11047	8807	6630	11946	7713	11619	11984	6291	9050	10987	9980	10573	9271	7421	13969	12908	12828	9108	6714	7127	6469	6035	4346	14219
ENSG00000166747	164	AP1G1	10560	6297	8131	8202	9235	5811	6853	5921	5628	6061	4771	7540	7545	8865	4247	5117	6046	5558	7928	4433	7173	4379	5637	6844	6551	5591	7658	4926	6675	5972	4054	8199	9877	6594	7630	7465	5641	8113	10256	6888	12016	5168	5279	6144	3999	4713	10963
ENSG00000213983	8906	AP1G2	5504	5223	4169	4247	5581	2479	3265	1869	5563	5609	3664	3780	3716	2541	2919	4290	3565	2952	3934	2755	4301	2848	6529	4658	8863	4363	7989	7106	4857	4230	3946	2967	3909	2387	5309	2407	4151	6872	7840	3158	2768	3403	4535	3573	3557	3507	4667
ENSG00000072958	8907	AP1M1	1195	2211	2117	812	1738	1424	1880	1147	1490	1511	1130	845	1900	1674	1081	1085	969	2398	4984	1440	985	908	2867	1637	1369	836	1960	1164	1305	1700	1279	1979	1288	1308	1700	1440	1526	1822	2069	1197	1596	1111	1268	1161	1136	905	887
ENSG00000129354	10053	AP1M2	9464	9643	7948	6583	9913	8924	5165	6565	9906	9059	6571	6587	7246	6328	4611	6829	9452	5364	14637	4423	4511	4046	9611	7459	8833	7071	9750	8993	6089	7659	5138	5297	7419	9789	11330	7967	4781	7019	7520	7703	6298	5796	5887	3631	4808	4060	5754
ENSG00000106367	1174	AP1S1	7966	10261	11662	6770	8882	10287	6659	10613	9335	8640	9295	12611	7387	9064	9044	4692	12179	9211	11824	11238	13491	10654	7452	7627	11280	7239	9671	5999	13055	12691	8155	11466	16851	11549	6245	8518	7521	13921	11412	11960	3082	4054	11529	8972	12016	9601	10389
ENSG00000182287	8905	AP1S2	670	938	533	397	460	531	1121	538	256	359	592	734	913	585	722	370	479	614	905	391	421	266	4589	1856	239	214	350	355	1080	938	814	1347	797	4266	9624	8874	847	1807	2350	2406	246	518	1086	1080	1085	1073	514
ENSG00000152056	130340	AP1S3	437	561	1489	842	1289	661	401	495	350	400	441	431	370	748	584	481	610	914	1009	581	654	729	1390	555	403	261	539	366	534	683	407	784	726	781	901	902	213	2417	1637	484	303	726	870	844	881	532	581
ENSG00000196961	160	AP2A1	4787	5820	9717	6829	10344	4428	5581	4625	8199	7850	3457	4177	3432	5632	2705	3815	5644	5577	8908	3326	3895	3011	10976	7446	5473	4387	4846	7091	4936	6074	4142	5936	4773	7945	9702	9243	3881	5801	5697	6461	4762	3494	6891	5162	5811	5206	3836
ENSG00000183020	161	AP2A2	2608	2285	2367	2210	2464	2865	2010	2357	2169	2066	2603	2107	2260	2487	2240	1277	1684	3384	3111	4036	4829	3699	1870	2084	2927	1757	1886	1761	1938	2035	1921	2585	3641	1687	1794	1415	2770	2399	2150	1213	2607	1694	1257	1091	1449	1023	2763
ENSG00000006125	163	AP2B1	2811	6311	10674	8309	9637	9272	6529	20750	8953	10933	13963	12065	6635	8769	5393	5978	8256	11897	14978	7584	7417	7935	17355	12823	16851	11532	20240	9943	5657	4606	7894	12631	12013	8453	13102	7705	5835	10283	8456	12234	9935	10161	8234	4671	4239	3863	6585
ENSG00000161203	1173	AP2M1	9005	7786	13277	9871	12405	9196	10023	17205	8363	8497	13656	19922	10073	15104	8340	10143	14262	22386	26602	11137	9317	7827	13706	13828	9523	6864	15697	8026	13239	12678	6758	13584	13223	12705	15857	10155	9052	12865	12858	14866	7893	9211	20425	19996	16052	11899	14832
ENSG00000042753	1175	AP2S1	4883	6154	5420	3522	5173	3064	6315	3615	4901	4712	2766	3234	2920	5967	2927	2996	2856	3889	6368	2739	3154	2485	5818	5949	4085	2016	3477	3331	4209	4401	3987	5223	3612	4776	9309	4459	2515	5356	4698	5304	2634	2444	6233	4483	5574	3804	4471
ENSG00000132842	8546	AP3B1	5380	7250	6839	7029	8272	5247	3777	5602	6832	6593	3867	5712	3117	5357	2806	4398	3313	4409	6004	4963	3862	2769	6654	6890	4058	2136	4484	3760	4217	5184	3049	5873	7519	6428	8140	5068	3967	7487	5976	5394	10167	4890	8087	4925	5999	4513	4448
ENSG00000103723	8120	AP3B2	5	22	0	0	0	4	3	15	11	6	313	106	4	147	23	14	1	3	7	97	138	39	20	91	2	0	0	2	15	48	0	401	129	25	2	5	33	28	9	16	31	0	17	8	2	2	23
ENSG00000065000	8943	AP3D1	20289	19798	13586	9428	14321	7854	10994	11246	15916	16478	8259	9300	9121	12438	8056	12233	9556	20602	21889	9642	9728	8161	19925	15516	10792	7773	14878	9278	11738	13318	6962	17212	11543	13274	14680	10987	6801	11334	10829	12552	11488	10092	10327	9072	8868	6281	11248
ENSG00000185009	26985	AP3M1	2494	2956	2512	1703	2141	1756	3354	2519	2737	2746	1969	2108	2332	2911	2083	2185	3267	3485	4530	1639	1951	1811	3272	2531	2703	1934	2992	3150	2261	2931	2494	2592	2722	3918	3575	4096	3051	2200	2514	3105	2370	1963	4332	2905	3180	2453	1926
ENSG00000070718	10947	AP3M2	4655	6731	1334	948	850	2320	1455	2526	1018	977	2032	1377	989	3924	1615	2991	2201	2091	2578	2099	2141	1784	1337	1285	1089	644	978	1387	1100	1317	1158	2567	2330	2190	2544	1397	4553	3732	1752	1271	1499	951	1479	1411	1238	1332	1172
ENSG00000177879	1176	AP3S1	2313	3156	4796	9276	6977	3588	3229	3626	3870	3372	2762	3129	3929	3351	1184	1807	3528	4522	11451	2635	4250	3068	4060	3876	4007	1817	2486	2726	2859	3333	2235	3262	6095	2841	3924	2430	3093	4369	3206	3368	5004	2604	4842	2652	3572	3291	2550
ENSG00000157823	10239	AP3S2	1397	1768	1066	1157	1280	1682	1528	991	890	1066	1065	863	866	1337	1172	1420	723	825	1101	972	1751	1376	1915	2209	1818	1070	1507	830	1066	1303	1560	1477	1137	1370	1989	1225	1092	1101	1420	1581	2831	1223	1900	1173	1537	1557	1210
ENSG00000134262	10717	AP4B1	2435	1485	453	233	399	810	461	709	483	508	633	861	728	649	603	597	781	904	1149	891	2271	1475	1296	1019	931	860	1037	1042	959	693	897	1225	875	1005	1251	737	319	1115	1181	739	1326	753	1003	897	793	690	778
ENSG00000081014	23431	AP4E1	1809	1641	1749	1087	1502	627	1734	1360	1203	1135	1137	1109	647	1555	2174	1873	884	1331	2184	1014	1115	771	1433	914	812	624	1184	579	1428	1433	857	2528	1351	1058	1630	1263	1091	1470	1600	1455	750	1068	2158	1535	1435	937	1479
ENSG00000221838	9179	AP4M1	1724	1810	1727	1017	1323	1881	1926	1495	1898	1648	1141	1494	2142	1572	1894	1132	2389	1401	2076	2236	3075	2866	1846	1658	1304	864	1168	1438	1251	1225	1579	1714	1893	1951	1457	1484	1113	1594	1941	1248	3017	1351	1499	1287	1519	1512	2516
ENSG00000100478	11154	AP4S1	674	618	199	107	206	143	387	480	348	298	305	248	87	296	375	249	210	281	384	228	63	83	233	229	385	233	519	354	346	287	97	257	211	151	359	133	317	471	600	115	26	320	918	676	515	426	312
ENSG00000254470	91056	AP5B1	1096	1425	2007	960	1546	1479	1621	2653	1171	1097	2010	2227	1079	1979	1373	1532	1704	2695	2734	2393	2552	2091	1644	1411	1539	829	2586	1263	2335	2265	1124	2413	2721	1195	1184	897	1533	2645	2618	1622	1449	1903	1449	1081	1122	969	2353
ENSG00000053770	55745	AP5M1	4312	3951	4055	3233	4725	2178	4188	6025	2756	3082	2333	2935	1813	2268	2361	3052	1249	1860	3383	1957	1718	913	4234	3669	3126	2583	5021	2606	4187	3924	2176	2797	2627	2718	4443	2589	1937	5687	6327	2833	2287	2602	4893	3466	3367	2631	3628
ENSG00000125843	55317	AP5S1	1497	1363	1533	452	1023	1088	2404	642	1693	2230	812	1212	1307	2858	2059	1593	676	2109	2712	1681	1042	1351	2545	2054	1294	547	1381	893	845	630	976	833	488	1705	1766	1748	1639	655	875	752	294	536	2144	1664	1665	890	1433
ENSG00000242802	9907	AP5Z1	5350	5924	1775	1041	1312	3346	2225	3621	3165	2843	3789	4685	2884	5615	3994	3114	3690	4809	5468	6862	7223	8649	2577	1728	3040	1876	2588	1867	3659	3253	2168	4053	3817	5385	3073	4656	2059	2826	3303	4795	3594	932	2161	2192	1845	1739	3591
ENSG00000120868	317	APAF1	3070	1872	2788	6658	3782	1510	1783	2082	3362	2918	1225	2279	2718	2574	1740	1488	2145	1990	1636	1743	2319	2271	3107	3298	1634	2657	1778	1304	2770	2714	943	2595	3705	1968	2602	2078	1461	4627	5857	2258	4570	1526	2480	1813	1791	1406	1587
ENSG00000107282	320	APBA1	59	79	32	89	129	18	8	17	8	21	14	27	38	146	23	19	19	29	12	39	25	16	0	10	149	83	75	40	24	20	4	18	39	12	2	12	20	26	39	6	15	18	329	143	269	162	96
ENSG00000034053	321	APBA2	0	0	0	0	0	0	1	0	0	0	0	3	0	1	1	2	0	4	63	0	0	3	11	10	1	0	0	0	1	1	0	0	0	1	0	0	0	0	0	0	0	0	0	3	0	0	0
ENSG00000011132	9546	APBA3	843	843	784	554	642	547	888	566	1039	1023	487	534	623	672	545	1121	877	1489	1514	714	909	996	529	355	786	510	913	608	624	666	581	841	740	799	815	596	441	535	491	693	699	635	531	540	436	489	618
ENSG00000166313	322	APBB1	5	38	14	0	5	240	81	31	299	303	842	1141	326	1541	2086	1216	251	646	1094	388	230	292	448	632	437	33	44	58	229	348	36	1268	1485	214	232	71	231	61	169	974	146	311	132	123	151	126	130
ENSG00000077420	54518	APBB1IP	0	0	0	0	0	0	0	0	1	0	0	3	0	0	2	1	0	3	3	5	1	8	0	0	0	0	0	0	0	0	0	3	3	0	0	0	0	0	0	0	0	0	0	0	0	0	0
ENSG00000163697	323	APBB2	2476	3092	3356	3997	3224	1822	3654	1141	5167	6401	1453	2169	3604	1202	1793	2970	1611	2297	1888	1111	1283	649	3022	1844	1340	1044	2293	1316	1422	1922	4634	2109	2311	2773	4977	4134	1907	5531	8346	2924	2138	3909	2882	1257	1805	3130	2112
ENSG00000113108	10307	APBB3	292	322	163	127	183	255	204	281	222	190	323	326	302	208	108	342	568	476	523	194	286	299	278	186	260	74	145	234	127	259	274	232	468	167	402	158	207	262	276	214	520	339	140	43	148	164	110
ENSG00000134982	324	APC	680	683	2780	2049	2852	1769	3180	2438	1904	2069	1759	2547	2644	1677	1444	1730	2444	3898	3638	1733	1991	1385	354	353	1815	836	1660	1834	413	562	1237	1864	2881	496	772	646	546	3553	3654	2014	3905	1958	2461	1533	1608	1473	1564
ENSG00000115266	10297	APC2	30	15	22	5	16	35	10	53	8	13	39	13	20	29	23	7	29	30	44	17	21	5	13	6	5	4	11	15	78	89	16	32	35	7	14	11	20	40	21	10	19	18	37	35	42	23	70
ENSG00000154856	147495	APCDD1	822	8107	1	1	4	5736	22155	35	39700	46369	5301	41534	2333	2149	34203	29109	0	1	2	2347	859	241	1195	2711	1177	3190	3415	2384	148	749	6941	112	324	99308	219385	39582	617	560	2453	43547	148	11016	11222	8327	8349	9376	11663
ENSG00000198768	164284	APCDD1L	0	0	0	0	0	0	0	0	0	0	1	3	0	0	0	1	4	0	7	0	0	0	0	0	11	194	70	27	0	0	0	0	0	0	8	0	0	0	0	5	1	0	0	0	0	0	2
ENSG00000132703	325	APCS	0	0	0	0	0	0	0	0	0	0	0	0	0	0	0	0	0	0	0	0	0	0	0	0	0	0	0	0	0	0	0	0	0	0	0	0	0	0	0	0	0	0	0	0	0	0	0
ENSG00000164062	327	APEH	5818	7823	13933	15745	13450	13580	17485	15230	12475	13588	18703	20203	11674	14024	13087	12016	10020	11985	13687	10971	10603	8323	19843	16886	9677	5120	12604	8117	16444	7819	11092	18903	21409	22786	17552	20060	15483	22710	19744	22521	11554	10375	12668	10206	9795	6623	16427
ENSG00000248329	100506013	APELA	0	0	0	0	0	0	214	1	0	0	0	0	0	12	0	0	0	8	7	0	0	0	0	0	1	0	0	0	0	0	0	0	0	1	0	0	12	0	0	0	0	1	0	0	1	1	0
ENSG00000100823	328	APEX1	4019	3917	4469	2805	3739	3585	6792	2794	3857	3204	3798	3960	3039	5415	3927	3989	2199	2706	3514	3497	3157	2592	4870	3892	5684	3497	7541	7128	5492	4284	3655	3653	3717	2193	2287	1723	4790	5816	6778	2363	1553	5376	5595	4544	3407	3409	6667
ENSG00000169188	27301	APEX2	1835	2125	2277	1725	2210	2256	1861	1847	1975	2007	1940	2109	1972	2614	1445	2006	1859	1838	2007	1539	1922	1776	2080	1935	1744	1490	2469	1625	2491	1942	1751	3048	1731	3289	3262	2618	1869	4182	4040	2831	1751	1404	2017	2544	1599	1719	2009
ENSG00000117362	51107	APH1A	12065	11691	11785	8671	11918	9311	10181	9888	11953	11443	6869	7859	10532	9566	8236	10478	13466	6129	16028	11023	14498	10714	20843	14176	11751	11006	12712	12703	9100	9613	8389	12367	11869	15621	17493	12847	7410	9660	9371	9855	8235	11651	14500	12193	13412	13389	12027
ENSG00000138613	83464	APH1B	140	138	218	440	250	573	1064	17	882	768	747	1310	1364	877	1168	1528	490	447	1040	621	1090	573	40	283	592	246	203	511	231	224	41	445	830	2331	1641	1823	1867	653	1225	788	602	1089	1067	670	1083	1350	224
ENSG00000166181	8539	API5	5761	4809	8130	6419	7816	7686	8269	10005	4719	5137	9224	10309	2755	6874	4662	5073	4898	9305	9293	6655	6348	5126	8556	9937	6112	4353	6580	6092	9390	8883	4649	12976	12678	7967	8845	6633	5423	8556	8374	7960	6350	6523	5624	4576	4530	3694	11813
ENSG00000149089	51074	APIP	1256	1508	1479	1145	1639	1839	1269	3471	1235	1341	1876	1603	1744	2846	989	1399	1138	1541	1697	2216	3162	2864	2051	2568	1620	865	1537	1318	1240	1640	2029	2916	3115	2051	3020	1939	1531	2844	2602	1487	649	1607	1071	786	911	870	3634
ENSG00000169621	200558	APLF	1186	1216	174	252	174	1003	945	273	1101	885	354	1064	688	804	492	1188	152	350	352	490	793	584	371	372	637	696	570	118	670	541	371	615	904	1121	1459	916	666	321	814	510	749	856	403	463	445	647	1662
ENSG00000171388	8862	APLN	108	98	14	6	5	31	71	89	21	20	33	6	164	52	83	19	1	5	12	41	41	36	5	22	30	4	3	24	115	36	108	89	15	6	6	10	91	47	93	24	3	29	279	200	76	53	13
ENSG00000134817	187	APLNR	0	0	0	0	0	0	8	1	6	5	1	0	0	1	0	0	0	4	1	0	0	0	0	2	0	0	0	0	0	0	0	0	0	2	8	1	0	0	0	51	0	0	0	0	2	0	5
ENSG00000105290	333	APLP1	0	1	7	2	4	6	4	2	4	2	4	20	8	8	8	4	14	19	78	33	40	25	23	14	3	0	0	1	5	12	0	14	27	57	204	20	17	42	92	21	10	2	36	28	86	92	3
ENSG00000084234	334	APLP2	17269	16467	22137	34724	24853	25559	26632	23570	26455	25144	26479	35377	18363	31310	11041	15640	34720	45074	33206	23070	43123	36451	27375	30625	35549	31403	46784	18333	25106	26693	17289	29966	37640	24244	42363	17439	32526	19362	29578	36563	46816	25538	44777	33013	37837	37647	31563
ENSG00000101474	57136	APMAP	8662	10593	7330	3676	5790	19649	7216	4176	12747	14533	21229	24483	15443	12813	12421	9151	13785	13540	14600	11280	15717	17137	15703	16333	11918	8089	11625	11711	14005	17439	17193	9755	9709	26998	22372	20075	16100	3506	3905	7064	3938	13345	14087	10709	10873	12189	5460
ENSG00000118137	335	APOA1	32	1	1	4	2	57	62	39	4	2	3	0	17	3683	2	1	5	0	453	8	9	16	3	6	4	4	23	9	0	2	6	16	23	4	2	5	89	3	3	3	42	3	2	9	1	2	4
ENSG00000158874	336	APOA2	12	0	5	9	12	24	287	16	6	9	9	8	47	17548	3	0	14	113	1985	55	31	24	211	845	5	2	32	15	0	0	194	257	15	124	983	235	48391	7	16	9	51	5	8	17	3	3	3
ENSG00000110244	337	APOA4	50	0	0	0	0	1	2	0	0	1	0	0	5	63	0	0	2	5	928	0	2	0	0	0	2	11	24	0	0	0	0	14	7	2	1	0	0	0	0	0	753	0	0	0	0	0	0
ENSG00000110243	116519	APOA5	0	0	0	0	0	0	0	1	2	2	2	0	1	27	13	2	0	0	1	0	3	1	9	0	1	1	0	3	0	0	0	12	30	4	0	6	0	0	0	2	13	0	0	0	0	0	1
ENSG00000084674	338	APOB	2	0	0	1	0	2	0	0	0	0	0	1	5	1312	0	30	0	0	17	3	71	23	0	2	1	0	0	0	1	1	0	396	55	0	0	0	0	0	0	2	389	0	1	12	0	13	16
ENSG00000111701	339	APOBEC1	425	518	242	787	555	128	181	89	241	371	14	210	219	65	24	60	21	19	9	399	1214	803	44	182	270	83	225	26	115	20	325	367	257	36	20	79	79	84	121	419	904	101	426	290	388	357	44
ENSG00000124701	10930	APOBEC2	0	1	2	2	0	0	0	1	0	1	0	0	2	8	0	0	0	0	0	0	3	0	0	1	0	0	3	0	1	0	1	2	0	3	0	0	3	0	0	0	1	0	0	0	0	0	0
ENSG00000128383	100913187	APOBEC3A	2	0	0	0	1	4	0	0	3	0	0	19	3	0	0	11	7	0	0	1	1	1	1	0	2	0	4	0	0	0	0	0	0	5	23	0	0	0	0	4	1	0	0	3	1	1	0
ENSG00000179750	9582	APOBEC3B	150	242	24	93	33	76	68	148	184	172	52	135	215	303	41	95	86	109	61	70	309	297	352	109	64	237	84	33	206	160	58	85	81	26	24	27	44	345	212	77	0	109	174	156	129	145	88
ENSG00000244509	27350	APOBEC3C	0	19	599	1336	766	289	34	2044	1360	1086	315	604	89	3077	112	188	693	325	91	27	32	28	207	123	765	1756	112	255	37	96	1	228	169	471	1130	413	126	1245	1366	387	160	613	124	260	156	135	272
ENSG00000243811	140564	APOBEC3D	0	2	10	49	28	15	0	8	23	35	1	20	17	31	3	20	31	9	0	3	27	30	12	7	41	78	13	16	0	1	11	7	10	18	59	12	8	23	30	4	19	24	5	8	11	27	13
ENSG00000128394	200316	APOBEC3F	2	19	55	77	79	49	28	101	217	192	62	162	94	147	120	100	263	177	61	54	124	124	64	47	108	154	59	72	40	80	72	39	33	143	342	109	60	106	156	131	45	165	67	35	91	75	100
ENSG00000239713	60489	APOBEC3G	0	2	7	144	96	28	1	5	176	241	96	88	60	41	11	90	2332	680	204	15	86	41	17	25	18	7	11	10	4	45	23	4	9	337	3472	406	16	167	343	1110	12	134	81	19	85	206	73
ENSG00000100298	164668	APOBEC3H	0	0	16	6	9	2	5	0	3	3	0	0	0	0	0	0	22	7	0	0	1	0	0	0	0	0	0	1	0	4	0	0	2	6	1	0	0	87	68	2	0	18	0	0	1	6	0
ENSG00000173627	403314	APOBEC4	17	22	13	3	12	11	35	1	10	13	7	2	21	3	5	0	0	0	4	0	1	0	9	9	5	1	1	23	1	7	11	5	1	25	11	27	0	2	4	18	2	15	3	0	4	3	4
ENSG00000184730	55911	APOBR	29	16	78	326	185	22	66	68	214	139	42	233	232	72	10	69	3	12	1	5	9	0	8	65	27	28	14	16	1	2	1	130	87	61	221	82	17	197	102	74	152	45	0	1	1	0	44
ENSG00000130208	341	APOC1	44	30	25	76	38	77	376	171	557	452	217	127	126	251	282	194	480	250	302	102	381	295	426	194	216	450	202	410	68	57	106	108	103	53	86	41	100	57	75	103	96	105	561	491	582	957	369
ENSG00000234906	344	APOC2	9	4	0	0	0	10	30	1	4	6	0	0	6	7	0	0	0	0	5	0	0	0	0	1	0	0	1	7	0	7	3	3	9	22	25	49	0	0	0	13	3	0	2	4	0	4	6
ENSG00000110245	345	APOC3	4	0	0	0	0	0	0	0	0	0	0	0	4	42	0	0	0	2	83	0	0	2	0	0	0	0	1	0	0	0	0	5	4	0	0	0	4	0	0	1	11	0	0	0	0	0	0
ENSG00000267467	346	APOC4	0	0	0	0	0	0	0	0	0	0	0	0	0	0	0	0	0	0	0	0	0	0	0	0	0	0	0	0	0	0	0	0	0	0	0	0	0	0	0	0	0	0	0	0	0	0	0
ENSG00000224916	NA	APOC4-APOC2	4	2	0	0	0	2	12	2	0	9	0	0	3	5	0	0	0	0	4	3	1	0	0	0	0	0	0	0	0	0	3	0	6	5	11	36	0	0	0	9	0	0	0	0	2	1	6
ENSG00000189058	347	APOD	16	12	10	88	25	105	151	6	59	44	41	250	486	156	1	1	25	33	3	89	166	20	46	114	301	81	113	102	3	0	33	25	9	315	188	559	285	41	23	15	3	3	201	222	75	253	34
ENSG00000130203	348	APOE	2	9	23	31	7	38	273	39	433	460	301	200	189	1148	953	665	1398	990	815	536	762	1245	1321	413	266	179	70	341	12	81	135	44	135	551	794	258	341	65	119	1378	120	117	584	261	632	1252	21
ENSG00000175336	319	APOF	1	0	0	0	0	0	0	2	1	0	0	0	1	0	0	0	0	0	1	0	1	0	0	0	2	1	0	2	0	0	2	0	1	0	0	0	0	2	0	0	1	1	0	0	1	0	0
ENSG00000091583	350	APOH	0	0	1	1	0	9	0	3	4	11	4	13	1	64	11	25	9	1	78	2	3	12	3	1	2	15	3	8	0	5	0	2	1	18	2	11	0	33	13	7	2	7	21	32	7	20	19
ENSG00000100342	8542	APOL1	17	50	470	892	222	189	131	536	601	403	97	242	193	312	43	33	528	314	68	25	53	155	44	16	30	55	42	6	53	42	53	29	11	332	165	192	21	322	337	150	256	72	117	151	193	363	36
ENSG00000128335	23780	APOL2	670	1104	1690	1023	1592	534	835	1567	1137	910	539	923	567	1441	720	647	1491	2103	1842	344	681	943	489	391	689	778	887	406	383	522	761	728	916	1483	1507	1028	204	910	804	1406	2278	629	324	448	345	414	510
ENSG00000128284	80833	APOL3	1	4	49	294	132	52	121	14	3	8	7	62	288	1	7	23	59	11	21	32	112	61	10	10	3	4	0	2	7	9	14	3	0	89	83	106	1	153	185	19	84	52	23	81	52	101	0
ENSG00000100336	80832	APOL4	2	2	41	69	59	8	58	1	31	16	24	125	13	3	1	4	2	9	0	8	15	4	0	0	5	0	3	2	1	2	79	1	5	44	285	34	131	0	7	9	10	2	4	0	2	4	1
ENSG00000128313	80831	APOL5	0	0	0	0	0	0	0	0	0	0	0	0	0	0	0	0	0	0	0	1	0	0	0	0	0	0	0	0	0	1	1	0	0	0	0	0	0	0	0	0	0	0	1	0	0	0	0
ENSG00000221963	80830	APOL6	12430	12771	6589	15932	9652	4371	2687	5870	3285	3298	2959	2075	4520	1353	2063	3150	5321	2785	1429	2695	5722	5432	1510	3071	2593	7691	2984	2026	4592	4192	7115	2425	1518	2927	3914	2986	3024	3417	3627	4291	12995	2967	1668	802	1783	2904	3544
ENSG00000178878	81575	APOLD1	396	458	124	148	133	972	469	187	470	370	1091	601	335	249	1260	303	310	351	294	357	558	502	579	377	641	705	1024	4376	2116	1135	315	341	249	5730	1366	5535	1174	4199	11842	208	236	10043	406	655	351	548	715
ENSG00000204444	55937	APOM	79	51	42	31	52	30	137	55	44	50	28	19	55	648	34	26	32	40	193	54	74	37	52	77	55	60	47	140	42	27	47	43	62	43	40	75	86	44	58	46	39	57	104	83	59	61	45
ENSG00000184831	79135	APOO	844	630	737	495	751	816	714	1298	469	539	1270	756	911	955	812	410	527	512	575	797	1228	1176	1125	1117	704	347	995	527	675	791	930	1847	1000	912	909	849	940	1226	1181	522	1092	394	670	596	581	550	1006
ENSG00000155008	139322	APOOL	1154	1544	647	731	697	895	1048	798	1068	993	895	1258	1009	1628	911	1129	1002	547	616	1005	1384	1472	935	1082	1602	1120	1349	1137	665	665	1389	2158	1124	1537	1766	1340	1301	1378	1623	1107	1520	553	1077	655	817	975	1228
ENSG00000142192	351	APP	35009	29380	44266	59368	54093	33330	28751	34177	40268	47126	32655	34465	17753	29378	21667	28669	27300	22053	31710	35393	75357	54402	51858	36241	36908	42372	24137	39603	29661	52873	34502	1737	1480	59614	62524	66562	82630	55037	92965	59728	30325	32543	49762	30038	34720	55531	34733
ENSG00000062725	10513	APPBP2	1703	2567	2368	2877	3235	1901	2933	2237	4558	5274	2379	2953	3052	3778	2231	3101	3416	3380	4487	2253	2274	1546	3252	2920	3940	3611	5045	4139	1741	2152	2922	3301	3886	3301	4268	2804	2719	2349	3634	3506	2734	2507	4387	2829	3754	3420	2292
ENSG00000157500	26060	APPL1	2812	3369	2380	7069	2498	5358	4812	4409	2272	2787	7419	4728	6048	4129	4345	3862	7318	5919	4425	4571	5101	5105	3645	4193	3535	2866	4648	3644	4376	6559	3250	6405	5609	6609	7250	5362	7831	4035	4801	2760	4826	6415	4669	3435	3683	3080	4579
ENSG00000136044	55198	APPL2	2903	2707	3038	6789	4258	2041	535	2221	3894	3555	1544	2955	3354	4044	1195	2551	1967	2114	2206	2073	3082	3455	1647	1815	2990	2596	3025	1896	1973	2453	2212	2489	4433	958	1884	859	3349	2063	2414	1917	3022	3391	2472	2038	1749	1876	2936
ENSG00000198931	353	APRT	7198	6928	12224	6423	11325	9479	11035	8133	6771	6683	7698	8879	8247	13808	4460	5696	9285	6102	12900	5378	7716	5771	5936	6416	12104	7039	11766	9465	7240	7151	8187	10458	10680	10156	9720	9728	10425	11877	9201	8397	4305	5573	6618	11236	5951	7628	15084
ENSG00000137074	54840	APTX	3002	3321	2546	1433	2168	2593	2385	1773	1655	1697	2000	2201	2277	3969	3055	4041	1907	2329	4935	1667	1539	1360	3404	3951	3558	3101	6117	3000	3881	2515	2934	4407	3166	2226	2235	2053	1600	2445	2505	1903	2574	3531	1625	1631	1434	1039	3149
ENSG00000240583	358	AQP1	2779	3093	10	5	6	21	25	52	11	20	110	38	4204	17	5	13	52	15	26	41	685	43	75	147	32	15	34	28	9	62	12155	63	38	544	77	540	54	18	24	148	234	76	6	12	13	16	94
ENSG00000143595	89872	AQP10	0	0	0	0	2	0	0	0	0	0	0	1	0	3	0	1	0	0	0	0	1	2	0	0	0	0	0	0	0	0	0	1	0	0	0	0	0	0	0	0	0	0	0	1	2	0	0
ENSG00000178301	282679	AQP11	67	225	242	149	170	105	164	274	224	196	217	205	95	395	72	148	171	285	224	273	380	408	76	179	236	109	494	93	198	178	168	292	539	148	156	125	199	199	223	275	143	134	354	236	237	179	191
ENSG00000184945	375318	AQP12A	16	1	6	5	11	0	0	4	6	22	0	0	4	1	0	10	0	0	0	0	5	1	0	4	6	11	0	0	0	0	0	0	0	0	0	0	1	0	0	0	0	0	0	0	0	0	0
ENSG00000185176	375318	AQP12B	4	3	12	12	35	0	3	16	29	15	0	0	14	9	0	20	0	0	0	2	3	3	0	8	4	14	0	1	1	0	0	1	0	3	1	20	0	3	0	0	1	1	0	0	0	0	0
ENSG00000167580	359	AQP2	3	0	0	0	0	0	0	0	0	0	0	0	2	0	0	0	0	0	0	1	0	0	1	2	0	0	0	0	2	0	1	0	0	1	1	5	1	0	2	0	0	0	0	0	0	0	0
ENSG00000165272	360	AQP3	1127	3415	571	908	875	137	101	15	1609	3926	627	255	938	312	2585	257	698	10810	7945	190	914	1029	499	178	850	110	593	1835	1248	656	3020	77	203	17	27	41	323	237	912	1881	136	387	2006	5411	772	2350	1284
ENSG00000171885	361	AQP4	0	0	0	0	0	1	0	0	0	0	0	0	1	1	0	0	0	0	6	0	0	0	0	0	0	0	0	0	0	0	0	0	0	0	2	0	0	0	0	0	0	0	2	2	5	2	0
ENSG00000161798	362	AQP5	6	6	4808	10452	7222	30	2	10	1	9	20	2	79	2	21	6	1	1	1	28	36	46	30	18	2	2	1	19	13	8	21	12	5	20	1	40	24	62	51	5	33	22	3	5	0	7	3
ENSG00000086159	363	AQP6	23	62	13	95	55	117	24	7	35	53	39	26	58	25	55	15	13	2	3	31	101	30	33	48	37	13	31	55	2	5	49	34	18	36	3	24	14	49	82	22	30	25	32	22	13	21	47
ENSG00000165269	364	AQP7	526	722	49	165	114	137	86	35	243	200	141	279	285	206	172	453	147	189	199	144	307	307	17	71	364	84	95	179	30	80	316	92	220	38	92	14	285	19	54	307	376	310	54	28	88	139	72
ENSG00000259916	100509620	AQP7B	0	1	0	0	0	0	0	0	1	0	1	2	0	7	0	2	0	0	0	4	6	2	2	0	3	2	0	1	0	2	1	1	4	0	0	0	1	0	0	1	4	2	1	1	0	2	1
ENSG00000103375	343	AQP8	2	0	1	2	0	0	5	509	25	1	2	1	15	458	1	795	0	1	0	0	0	0	41	53	193	2074	9	40	0	2	2	9	6	0	11	1	21	1	1	43	49	0	0	0	0	0	21
ENSG00000103569	366	AQP9	0	0	4	8	0	0	0	0	0	0	0	0	0	0	0	0	0	0	7	0	0	0	0	0	0	0	0	0	1	0	1	0	0	0	0	0	0	1	0	0	0	1	0	0	0	0	0
ENSG00000021776	9716	AQR	6137	4987	7962	4961	6211	3816	7010	4814	5913	5625	4758	5720	3322	8000	5073	7274	4155	3902	6676	4820	5468	3910	6892	6807	3474	2633	4860	3586	6291	6725	3598	5304	3070	5564	6208	5553	5087	7193	7822	5106	3289	5486	12270	9080	9411	7474	8039
ENSG00000169083	367	AR	0	0	0	0	0	0	1	0	2	0	4	13	124	5	21	12	0	0	0	6	8	5	1	0	3	2	4	13	1	0	0	2	9	9	2	0	0	1	0	7	8	0	0	0	0	0	0
ENSG00000078061	369	ARAF	2237	2777	2322	1732	2409	1771	2518	2154	3069	3117	2963	2654	2579	3201	1749	2310	1936	2424	2931	2304	2748	3050	3112	3224	3756	2215	3921	2501	1909	1735	2977	4775	2563	3155	3802	2851	3229	3413	3605	2003	2243	1490	2381	2247	1999	1930	2816
ENSG00000186635	116985	ARAP1	2767	3001	4697	5962	5712	3685	3603	3963	7515	6975	4885	6877	2912	7142	4188	4911	4871	5426	3295	4551	5087	4429	4821	5987	7067	5105	6213	3968	3867	3876	2922	5178	7700	4139	4142	3381	4901	3069	3832	5488	4589	5252	5014	3718	3523	3441	5438
ENSG00000047365	116984	ARAP2	6405	10462	2170	2504	2332	1978	2132	1931	2906	3747	800	3447	1368	1725	2018	2335	3669	2809	1310	1718	1775	1670	3160	1873	1926	2042	2631	2054	2762	2595	3851	2015	1840	3834	12376	2478	502	2288	3382	2382	2262	1995	2379	1543	1886	2050	4198
ENSG00000120318	64411	ARAP3	14	5	17	45	11	102	269	347	243	471	111	129	233	366	484	112	236	82	209	77	69	23	763	372	167	107	42	209	100	957	6	250	88	813	542	716	548	807	552	189	134	265	1271	1063	1406	1172	190
ENSG00000198576	23237	ARC	9	5	9	23	22	12	44	20	15	13	15	3	36	13	7	7	119	22	22	20	38	22	49	35	22	17	22	37	13	18	13	41	24	28	39	27	142	43	31	32	15	24	6	110	1	6	37
ENSG00000095139	372	ARCN1	12119	9560	6996	9820	9777	6157	11003	8652	6933	7115	6412	8875	5282	11791	5099	5281	9422	9903	8292	6513	10239	11644	8142	8505	8077	6678	12613	4267	7799	7662	4551	11241	13639	7777	10466	6343	8030	6759	6993	9094	19725	5727	9279	7956	8044	7300	10478
ENSG00000109321	374	AREG	5202	12604	2045	3828	4260	8448	1256	9030	576	1183	3524	2065	18700	21946	2721	5335	56844	23257	24998	2138	4347	4610	16824	10282	25364	15171	46243	28142	11554	9247	3980	13463	15387	5086	4908	2403	9625	1207	1400	8474	12313	12860	4533	3458	6596	9537	12913
ENSG00000119682	9870	AREL1	3892	4206	3631	2597	3748	2638	3947	2178	3530	3626	2110	2460	2351	2427	2053	2368	2688	3589	4981	2688	2671	2446	4427	3627	4040	2668	5510	3520	4698	4112	3154	3578	2622	2933	5429	2572	2978	4788	6081	2510	2323	3947	7009	4628	6207	4949	3924
ENSG00000143761	375	ARF1	35043	28996	23777	22398	27535	16028	19140	18425	18282	17733	13216	13167	21286	21949	15095	12967	25049	14767	33000	12797	19039	19376	42216	31351	23245	21292	26544	20787	13566	11302	16516	23490	24202	25189	28595	21686	15658	21042	16705	20878	30927	14311	22869	21680	20438	20395	21801
ENSG00000134287	377	ARF3	6214	6906	8231	11410	10748	8053	5880	8162	4982	5135	5576	7795	8110	8885	7535	5426	5082	6216	9561	6671	6921	4713	7591	8652	7638	5756	10185	6049	6678	7763	4660	6526	8522	10112	10476	7890	8342	10834	11448	10792	9458	5897	13703	9194	11375	7222	9412
ENSG00000168374	378	ARF4	12546	11282	5112	13454	6576	7523	7602	8661	6189	6150	8675	10781	7552	8330	9376	7266	8205	10231	9206	4657	9654	11798	9718	8965	4797	5097	6581	3527	8811	9474	4601	12133	10249	14674	17189	11711	7526	8322	9009	13664	28323	6049	4454	3596	3625	3465	10515
ENSG00000004059	381	ARF5	8295	8567	6406	3984	5622	5714	6384	6175	5748	5281	6153	5591	5541	6118	6556	3115	5358	4541	7605	5333	4864	3997	6335	6421	5842	3414	7836	4312	7159	7468	5443	6861	6896	8591	10592	7153	3982	7638	8087	3974	3381	2418	7981	5810	8543	6663	5437
ENSG00000165527	382	ARF6	7838	9817	9065	14474	11372	3245	6794	14995	7397	6512	3682	3597	4044	7135	3627	3895	14552	9376	16764	4282	4598	5036	7578	6465	9684	9416	15813	7947	8201	6683	4984	6375	5134	2961	6966	3154	4621	10920	10621	3980	4696	5621	9091	6662	7310	6669	8514
ENSG00000101199	55738	ARFGAP1	7683	6519	4868	3844	4739	5916	8030	7093	6030	7056	5348	6123	6313	12551	5003	5214	6083	8714	9094	6198	9490	13282	9674	8602	5499	3387	4535	4623	7039	9181	4453	10798	12222	9788	8754	7624	5990	5529	5583	12269	14244	13290	4004	3104	3678	3558	13513
ENSG00000149182	84364	ARFGAP2	8229	7316	6925	4677	6746	5173	6569	7550	6142	6836	6174	7999	3989	7526	3003	5393	4766	8173	6877	5719	6682	4755	7460	7979	5199	2864	4781	5087	7354	5871	5296	7781	9361	5799	7192	5461	5417	5450	6030	7577	3635	5005	3811	3949	3263	3038	9102
ENSG00000242247	26286	ARFGAP3	6236	7043	2048	3891	3301	1340	1875	1468	1043	1127	1853	1042	1825	1527	1461	1690	7072	5000	4477	1300	3481	3670	3987	2723	1407	1891	2401	1478	1855	2808	1666	2113	2664	3001	4662	2118	2482	1528	2594	1414	6684	1269	1261	749	1107	1432	1269
ENSG00000066777	10565	ARFGEF1	21456	16558	5757	8463	6715	8924	6588	14153	8842	8627	7981	9103	4256	12073	5822	11682	5890	5841	4771	7187	11171	8050	8880	12787	26246	22156	16249	19745	7707	10155	10222	9171	15201	6054	11819	6597	22219	5506	6963	12494	12644	5560	8060	5773	5771	5725	41108
ENSG00000124198	10564	ARFGEF2	18092	14667	12505	17182	12909	17804	12754	24946	17538	19230	16476	18879	10687	19924	14238	13467	10306	15206	13356	15349	25246	31038	13569	17181	14959	13173	10477	8182	24365	19303	10791	19422	28048	16979	19552	17387	15797	12262	15522	26377	35429	13272	8856	6079	5930	5724	22800
ENSG00000112379	57221	ARFGEF3	7147	3282	5260	7283	6015	2656	3862	1714	2459	3500	1056	1288	4601	1480	1753	979	739	2882	1439	3294	7187	6487	2873	2209	2593	3916	1945	2196	1585	1574	1493	3052	1773	2702	2834	3599	4776	3035	4838	2671	6240	4500	4091	2165	2502	2681	2927
ENSG00000164144	27236	ARFIP1	3845	3798	4559	5950	5620	3303	5240	3644	3962	5222	1823	3863	3558	4301	3405	2920	3124	2918	4710	2145	2308	1975	5122	5097	5432	3975	6485	4133	4519	6465	3340	5891	4651	2827	3402	3733	4892	5118	6351	3160	5663	4784	4407	3221	4496	4040	7194
ENSG00000132254	23647	ARFIP2	4282	4330	4954	4528	5801	4181	4101	5296	4080	4298	4942	5574	3686	6987	5697	3110	3123	6527	6982	5217	6063	6115	5093	5644	4885	3085	4260	4066	4689	5439	3062	7048	8488	3825	3507	2486	2898	3401	3346	5883	5489	4935	2707	2113	2425	1759	4833
ENSG00000101246	10139	ARFRP1	3118	4200	2823	1105	2080	2889	3329	3917	2395	3406	1930	2158	1706	3573	2983	2862	2113	3204	2735	3867	4029	3384	5497	3996	1938	1142	2053	2032	4419	5003	2614	3344	3919	3068	3103	3294	1877	3360	3156	4051	3123	4129	2530	2152	2173	1866	4682
ENSG00000118520	383	ARG1	0	0	0	4	1	0	0	1	2	0	0	0	0	38	0	4	0	0	0	0	0	0	0	0	0	0	0	0	0	0	0	0	0	0	0	0	0	0	0	0	0	0	0	0	0	0	0
ENSG00000081181	384	ARG2	4497	8558	1160	804	944	953	996	974	459	402	1603	2698	505	584	602	683	926	1282	1172	1022	999	1510	126	718	2797	1797	1394	739	609	656	225	1411	1316	416	1298	311	3634	1788	1756	922	3411	973	966	623	584	1181	1251
ENSG00000186103	503582	ARGFX	0	0	0	0	0	0	0	0	0	0	0	0	0	0	0	0	0	0	0	1	1	0	0	0	0	0	0	0	0	0	0	0	0	0	0	0	0	0	0	0	2	0	0	0	0	0	0
ENSG00000134884	55082	ARGLU1	12256	9448	3267	3697	3831	4515	16428	3290	7893	8814	6094	7732	9495	5584	3495	13673	3859	2765	2424	6977	12398	6009	11974	12978	6916	1957	4499	9294	7981	10419	14665	9534	6829	7116	10566	7356	10094	4123	4380	8461	10016	6566	5072	3495	4150	5439	3591
ENSG00000175220	392	ARHGAP1	1898	1418	1772	1743	1905	1056	2039	1646	1306	1676	1055	1490	907	1643	726	886	944	2153	1454	1205	1496	950	1160	1124	1241	951	1262	1124	1719	1267	1169	1367	1875	1629	3061	1821	1035	2526	2292	1765	1350	1061	957	1002	755	613	2084
ENSG00000071205	79658	ARHGAP10	40	0	686	442	378	84	9	415	3	2	385	458	15	455	8	661	172	669	423	274	131	531	616	133	612	632	259	809	1362	1431	0	39	990	4	15	9	905	811	758	907	465	720	1618	1175	1402	1043	470
ENSG00000198826	9824	ARHGAP11A	237	151	1091	669	695	96	695	607	524	614	370	365	300	744	354	552	305	256	542	480	499	479	1488	1295	406	243	594	337	773	588	268	802	271	87	177	203	274	777	511	226	186	384	1495	1099	1186	909	710
ENSG00000288864	114118903	ARHGAP11A-SCG5	6	1	8	4	3	2	4	2	2	4	3	6	7	2	1	6	0	0	0	1	4	2	11	6	0	0	4	3	2	2	2	4	1	1	2	1	1	5	12	0	5	0	6	9	6	7	7
ENSG00000285077	89839	ARHGAP11B	8	21	23	9	12	5	15	23	17	11	5	13	0	12	10	21	10	5	9	3	18	16	15	6	7	1	3	6	12	15	13	8	9	5	5	6	3	12	16	5	3	6	25	18	21	18	13
ENSG00000165322	94134	ARHGAP12	5120	8841	7391	7511	8110	4760	5152	5433	6525	6956	5407	5509	7439	5318	5932	3766	7962	8077	7090	10615	20892	14417	10292	7963	5707	4957	6276	5650	7973	10057	6550	5592	8854	3488	6964	3057	7537	7354	8906	6288	5779	10760	8693	7711	6859	7154	5207
ENSG00000075884	55843	ARHGAP15	0	0	0	0	0	0	0	0	0	0	0	0	0	0	0	0	0	5	4	0	2	0	0	0	0	0	0	0	0	0	0	0	1	0	0	1	0	0	0	0	0	0	0	1	0	1	0
ENSG00000140750	55114	ARHGAP17	714	458	378	631	365	354	877	436	684	655	288	390	504	777	390	372	345	1268	614	376	597	363	817	1013	445	542	449	339	826	661	304	791	733	320	767	648	539	757	837	602	911	514	314	524	252	342	595
ENSG00000146376	93663	ARHGAP18	9276	8368	4742	9103	5905	6607	5822	3071	18410	15964	5068	27649	8629	12292	8017	11762	4267	5067	2413	2808	3668	2377	23086	19775	6700	5738	3353	2611	7518	5002	4274	4705	7166	11365	12708	6415	6796	6525	7579	18514	7984	6889	1989	1807	1946	2215	11144
ENSG00000213390	84986	ARHGAP19	1032	604	1031	1062	1002	349	553	1040	1184	1025	894	566	934	1257	359	684	1293	431	512	605	899	1605	1426	1382	1371	681	1320	920	891	781	1207	1394	1092	465	411	480	740	408	331	555	807	336	1734	1030	1214	1063	883
ENSG00000269891	NA	ARHGAP19-SLIT1	0	0	0	0	0	0	0	2	1	0	1	2	0	0	0	1	0	1	0	0	1	0	2	0	0	0	0	0	0	1	0	3	2	0	0	0	5	0	0	1	0	0	0	0	0	0	1
ENSG00000137727	57569	ARHGAP20	0	0	0	1	0	6	8	0	2	0	1	48	6	7	6	5	2	0	3	4	0	0	0	0	0	0	1	0	1	0	0	0	9	0	0	0	0	0	0	8	0	0	0	0	8	1	29
ENSG00000107863	57584	ARHGAP21	5345	8468	8132	10083	11156	3300	4118	8064	5720	6287	4333	4235	6324	4544	3403	3693	6641	13349	7866	9712	15874	9948	10904	7611	5399	6802	7543	6547	6402	6611	5182	6635	5586	2297	6378	2218	6801	6619	8199	4991	8292	6082	7735	6310	6262	6481	4571
ENSG00000128805	58504	ARHGAP22	1	0	4	3	3	6	7	0	0	2	11	0	7	0	10	3	1	0	14	0	1	2	91	23	3	8	0	6	1	2	5	2	1	17	0	10	0	75	77	2	0	39	54	39	144	77	1
ENSG00000275832	57636	ARHGAP23	63	243	31	25	28	152	138	64	468	420	382	590	149	232	159	71	138	317	42	35	46	17	404	290	104	49	143	195	80	220	321	59	88	185	411	333	202	67	168	306	142	184	233	225	127	162	46
ENSG00000138639	83478	ARHGAP24	8	2	3	32	11	9	0	158	0	0	6	9	4	9	1	3	0	0	4	129	90	71	2	3	0	0	0	1	9	5	2	1	37	2	7	2	13	12	67	3	2	4	61	3	63	68	319
ENSG00000163219	9938	ARHGAP25	9	1	6	9	16	17	14	10	23	24	27	63	14	22	20	65	18	34	82	24	49	18	10	7	69	46	32	31	0	12	3	1	2	52	142	50	23	20	21	87	1	2	4	6	8	14	32
ENSG00000145819	23092	ARHGAP26	3993	3402	2992	4532	4493	1736	1579	2783	1341	1828	1477	942	2700	2839	887	652	1535	3286	1465	2056	4193	2384	3028	3646	2385	3201	1648	702	2345	2197	3228	2988	2672	1448	1427	2403	1267	4176	3380	1757	4470	2061	2087	1538	1687	1249	1602
ENSG00000159314	201176	ARHGAP27	2419	2648	2803	3043	3383	1601	1286	2322	2930	3706	1418	1340	2385	2514	1133	1237	2066	3214	2047	1986	3356	2709	2965	2588	3966	2555	3820	2681	1415	1457	2725	1859	2559	1703	2103	1952	1327	2099	2162	3095	3819	1829	2072	2175	1910	1902	1872
ENSG00000088756	79822	ARHGAP28	0	1	0	1	0	3	162	50	9	8	15	50	5	31	2	2	0	5	21	24	20	29	174	14	4	3	4	11	19	11	51	0	1	1	3	2	16	4	10	1	1	0	111	63	102	54	0
ENSG00000137962	9411	ARHGAP29	193	410	3001	3545	3380	1089	196	746	193	229	447	446	105	416	888	82	8073	8772	10817	110	175	633	1786	516	357	1856	1479	741	644	449	325	1035	550	213	252	194	136	1833	2689	355	1330	2185	1079	1352	760	1062	703
ENSG00000186517	257106	ARHGAP30	76	40	3	32	28	14	9	11	29	36	7	37	16	10	2	17	57	13	26	15	59	35	40	44	14	10	16	9	3	22	15	16	33	17	140	35	3	6	10	50	74	2	9	9	4	12	5
ENSG00000031081	57514	ARHGAP31	7	20	13	15	40	71	120	55	3	13	122	250	150	56	609	270	16	26	15	443	707	182	74	140	161	177	61	98	152	165	8	637	728	653	390	771	99	70	167	707	61	12	372	330	288	251	72
ENSG00000134909	9743	ARHGAP32	5413	4333	5760	8082	7713	3079	8760	6185	8038	7811	3605	9401	2387	3684	2428	2593	4749	15410	6813	3358	4859	4308	3282	4060	6747	5953	12400	2777	7963	6828	3388	3194	5210	2739	6429	3187	3485	3521	5224	7499	9045	3492	7390	6783	5533	5676	6852
ENSG00000004777	115703	ARHGAP33	37	34	53	71	50	7	69	42	98	116	16	32	83	16	33	63	42	27	38	30	30	27	386	313	106	85	66	123	76	88	36	104	81	10	27	29	22	62	68	12	64	28	115	50	105	109	46
ENSG00000160007	2909	ARHGAP35	8201	12326	7919	9662	8794	6247	11957	9081	13419	11444	6490	6608	6448	8950	5850	8095	8699	10936	15656	7067	7636	8442	11373	8862	8445	7821	7611	8415	7629	9065	6105	11670	7138	7642	10137	7945	6472	5844	7940	6995	8155	7591	16152	9542	11385	9968	10368
ENSG00000147256	158763	ARHGAP36	0	0	0	0	0	0	0	0	0	0	0	0	0	0	0	0	0	0	0	0	0	0	0	0	0	0	0	0	0	0	0	0	0	0	0	0	0	0	0	0	0	0	0	0	0	0	0
ENSG00000147799	80728	ARHGAP39	1754	2471	962	582	716	1177	480	1171	437	458	1151	878	1381	846	739	916	2167	2022	1894	2804	2577	2089	1979	1898	1998	1024	2190	1756	1838	1819	1849	1064	1390	708	619	598	2143	726	801	901	945	750	557	425	358	325	2458
ENSG00000089820	393	ARHGAP4	207	1473	6923	3198	6144	50	6001	3877	4338	4370	118	100	415	658	134	263	3195	2174	2245	2542	4395	1126	3390	2969	10045	3470	6031	6998	2896	2899	5394	4576	4875	8619	9302	6506	117	80	445	61	3332	97	10085	8476	7945	7751	54
ENSG00000124143	343578	ARHGAP40	1	1	1	8	3	40	17	6	1	2	20	18	5	66	5	0	350	176	48	36	40	18	158	40	15	43	5	16	0	3	2	42	16	183	103	240	13	18	56	61	10	15	14	13	12	29	9
ENSG00000165895	143872	ARHGAP42	2973	3784	1957	4189	3910	1718	1814	3388	2074	1882	2252	1728	1582	2573	862	1535	3150	4447	2412	1961	4191	5667	2701	3074	1563	1580	2596	897	1796	2481	1505	2081	4133	910	1681	1061	1282	1330	1758	2286	3639	338	1191	1219	1079	1763	2478
ENSG00000006740	9912	ARHGAP44	0	2	608	2649	1397	200	11	2542	49	79	1184	1701	380	586	195	938	466	810	940	366	578	890	164	166	1481	2297	651	311	169	218	32	747	903	240	54	16	153	180	169	370	317	386	161	102	109	97	1842
ENSG00000180448	23526	ARHGAP45	1710	2920	3310	2416	3361	2139	1810	2459	3519	3128	1656	1432	2003	3562	1223	1680	1537	3277	3760	1509	2305	2430	1976	1587	3488	2883	3328	2080	1490	2540	2636	2894	2105	2024	1663	1728	1751	600	633	3661	1531	1512	622	599	613	488	2480
ENSG00000100852	394	ARHGAP5	44997	45291	10186	15638	12930	5640	11950	33650	10262	9877	13091	9219	9548	12035	9743	16818	7216	8649	9303	6956	10851	9282	8278	8184	8444	9046	11081	8041	13463	12363	12858	13640	10266	8200	27688	8760	10144	17171	23151	8179	7684	13017	13834	11417	8598	9807	17045
ENSG00000047648	395	ARHGAP6	166	365	0	2	1	61	15	3	30	24	1322	2607	10	77	18	44	3	0	1	11	29	52	422	482	2	11	0	0	16	2	5	154	131	70	7	51	0	26	77	8	45	28	0	1	0	0	15
ENSG00000241484	23779	ARHGAP8	265	303	452	544	544	297	510	506	506	569	429	247	558	512	317	371	1068	1025	602	428	862	671	1081	618	545	814	690	546	270	507	562	414	440	450	660	550	346	746	521	365	1181	552	257	229	241	330	506
ENSG00000123329	64333	ARHGAP9	3	8	6	4	2	5	0	8	2	4	9	5	12	3	1	4	0	2	0	4	11	4	13	14	30	4	3	41	5	2	4	6	3	3	7	4	22	11	1	2	7	3	14	2	25	24	10
ENSG00000141522	396	ARHGDIA	1654	2348	2954	1765	2675	1690	7953	3001	3450	5313	1785	1854	2361	4178	2370	1846	2632	5120	4795	2445	3037	2974	6753	5130	3222	2021	4740	2460	2353	1718	3985	3868	3216	2920	3759	3013	1808	3635	3154	2830	2057	2642	5211	4124	4000	2938	2604
ENSG00000111348	397	ARHGDIB	89	63	565	3596	1508	452	258	63	2005	1788	524	780	699	808	118	138	927	1661	297	169	415	148	1685	2131	1578	1275	1016	560	33	402	47	342	94	291	202	264	320	3110	2157	103	744	412	1015	638	616	768	1603
ENSG00000242173	398	ARHGDIG	290	342	323	657	1113	682	177	212	2	9	690	440	242	69	250	194	229	33	123	529	1661	759	33	121	317	493	196	267	59	26	1753	490	304	277	497	132	63	85	206	134	771	53	180	239	87	280	322
ENSG00000076928	9138	ARHGEF1	5622	5408	3169	1609	2195	2369	3437	2369	4481	5082	2716	1979	4083	4953	2132	1936	4176	2369	4723	2040	3486	2996	7545	4528	2912	1657	1822	3848	2111	3151	3686	3648	3229	1463	1576	1794	2483	2802	2033	2102	2260	3417	4065	3250	3440	3525	1945
ENSG00000104728	9639	ARHGEF10	7	7	0	0	1	6	5	3	0	0	1	2	3	3	8	12	7	1	11	6	11	9	9	7	14	22	13	17	8	7	6	3	15	5	5	3	0	5	16	7	19	0	30	22	17	12	1
ENSG00000074964	55160	ARHGEF10L	5485	3784	7513	8870	9590	4151	4071	5095	7730	7595	3599	4729	6336	4940	2395	4634	3272	4048	2955	3684	5633	3017	5265	4775	5084	2860	3770	3134	2733	4722	4489	4484	3195	5526	6590	5709	4072	4553	4981	4835	4623	3820	3511	2354	3003	3624	4590
ENSG00000132694	9826	ARHGEF11	3649	3551	2792	2542	3261	2197	2800	2740	3533	4000	1787	2535	3067	3024	2944	3159	4747	2949	5511	3180	4950	4156	4890	4310	2792	2785	2697	3048	3142	2946	2092	3604	3372	4519	4824	4044	1991	2603	3424	3254	3767	3213	3776	3414	3121	2976	3903
ENSG00000196914	23365	ARHGEF12	15494	11632	9600	13023	10233	12932	19301	12124	11680	11416	9889	15501	8837	10479	8145	8190	21682	24539	19806	11401	15166	12555	10625	11053	9810	8199	16437	6162	13420	13093	9900	13050	18639	13680	27375	14605	8854	11097	18672	16097	21879	12996	22572	18926	15439	16432	15987
ENSG00000198844	22899	ARHGEF15	0	0	1	0	0	1	0	0	0	0	6	0	0	1	0	4	0	1	2	0	1	2	0	0	0	0	1	1	0	0	0	0	2	0	0	0	0	0	1	0	3	0	0	0	0	4	0
ENSG00000130762	27237	ARHGEF16	8025	6295	6169	5093	6832	3238	2415	4025	4384	4281	3016	3026	3540	4512	3167	4755	3361	5770	2829	3436	4030	4022	5837	4158	3807	2313	3574	2026	3909	6352	3433	3701	3760	3988	7834	4198	3559	4093	3322	3986	6042	1855	2802	2986	3205	2879	3339
ENSG00000110237	9828	ARHGEF17	28	24	153	327	271	137	42	52	825	608	563	926	325	1241	489	1484	1853	1339	1206	119	97	237	152	210	1054	349	586	1073	124	740	18	206	907	44	92	64	1293	223	194	676	91	475	390	108	270	474	211
ENSG00000104880	23370	ARHGEF18	5560	4534	4180	4900	5584	2482	2281	3537	4003	3965	2158	2433	3781	3755	2331	3541	3468	5575	7816	1917	2574	2489	2386	2237	3883	3029	4824	2601	3128	3405	2640	4140	3237	3020	4070	3177	2274	3260	4457	2980	2776	2728	2087	2296	1712	1630	3102
ENSG00000142632	128272	ARHGEF19	1292	943	468	505	452	1421	530	1432	1980	1879	1153	1800	2222	923	815	1163	806	1027	499	900	1164	584	779	1034	844	232	842	859	606	2684	1317	382	1212	443	267	237	1549	1643	1656	664	364	563	756	850	452	573	1798
ENSG00000116584	9181	ARHGEF2	7670	6688	3297	4459	3490	3010	2540	2384	5144	4683	2352	1671	4052	2574	2724	3409	4859	2154	3693	4496	6955	5953	6587	4009	2949	5190	2514	5397	2459	2514	4508	2353	3719	5400	4636	4540	3958	4013	4793	2910	5189	4555	3783	2834	3794	5057	1843
ENSG00000240771	115557	ARHGEF25	0	0	0	3	0	10	6	1	59	59	73	35	20	9	35	32	11	1	15	4	3	22	29	20	13	4	1	16	92	215	6	8	2	31	17	16	21	7	14	0	0	50	158	71	217	346	70
ENSG00000114790	26084	ARHGEF26	60	58	49	54	40	43	38	135	39	24	65	76	60	115	56	75	303	416	311	115	98	73	121	99	61	66	162	77	84	49	21	129	153	48	59	33	2	52	93	43	54	40	181	131	156	119	148
ENSG00000214944	64283	ARHGEF28	1042	739	1097	2275	1362	1260	443	501	1870	1453	583	1093	423	278	485	480	96	611	399	1387	2776	2163	980	977	200	511	342	410	407	595	226	806	1303	1071	788	842	1277	1479	2196	748	1643	1768	2512	1538	2061	2473	531
ENSG00000163947	50650	ARHGEF3	546	1326	661	884	554	1856	878	1215	1180	1215	1335	1436	1096	616	1302	837	1564	1653	1012	862	1447	1695	2082	1380	716	751	984	519	1489	2114	1023	1413	1230	2061	1488	2410	743	2773	3777	2262	1899	1934	951	891	900	978	864
ENSG00000214694	100271715	ARHGEF33	7	1	1	1	8	4	6	7	5	4	5	8	25	16	9	7	7	4	2	8	8	9	4	5	7	6	6	16	1	3	7	1	5	4	5	3	10	3	6	1	10	7	3	1	7	5	3
ENSG00000213214	445328	ARHGEF35	269	327	676	443	634	247	277	296	2	2	258	525	356	522	308	234	233	125	339	250	219	269	273	244	359	380	434	255	935	804	142	420	457	418	604	363	1	674	786	375	389	129	574	364	544	533	196
ENSG00000183111	389337	ARHGEF37	1628	3585	762	973	1398	1425	568	375	158	223	196	913	1030	65	1066	1676	426	792	467	1333	1458	1018	457	379	458	293	735	151	668	392	1365	206	395	1175	1140	1315	179	841	1508	1450	1167	393	776	461	594	493	160
ENSG00000236699	54848	ARHGEF38	1580	2013	729	1096	880	635	2113	589	291	546	230	104	688	219	438	211	78	42	45	684	1374	1128	235	274	739	1004	752	379	1039	1190	1639	476	154	1319	1829	1793	1273	1018	2002	842	1549	1169	644	418	515	897	922
ENSG00000137135	84904	ARHGEF39	410	336	1990	1598	1512	476	1809	807	1732	2026	861	1168	1143	2975	1286	2164	920	820	1330	934	866	808	1834	1800	2648	1257	3875	1747	1417	899	1301	1632	1755	207	191	214	539	1401	766	400	414	1211	1051	931	956	815	1318
ENSG00000136002	50649	ARHGEF4	35	15	0	0	0	524	362	4	59	49	470	231	190	120	533	338	1921	1361	846	57	109	176	1446	531	26	2	4	32	174	701	4	462	467	164	805	633	179	13	1	267	375	177	86	219	118	132	185
ENSG00000165801	55701	ARHGEF40	2333	1725	1224	2037	1164	652	384	1769	1463	1716	3350	1569	3344	2087	3443	1098	378	135	64	1285	2766	1965	478	929	9493	4425	6567	6101	1079	849	1383	973	651	1802	969	858	1534	1534	2917	419	1053	2526	3526	1408	2859	2526	3623
ENSG00000050327	7984	ARHGEF5	1775	1658	1758	1440	1956	1666	915	1178	1877	1769	811	1237	1554	1476	1980	1712	1580	1057	1504	1917	2798	2793	1453	1781	1101	1016	1066	649	1534	1842	1153	1582	1539	2485	2787	2331	652	1098	1384	1819	1638	1036	2026	1349	2228	2145	891
ENSG00000129675	9459	ARHGEF6	1	2	26	212	127	3	5	3	3	1	72	6	3	3	1	5	51	26	14	5	4	3	3	2	47	14	2	26	0	0	7	1	0	7	14	6	3	3	2	20	6	1	19	7	27	21	1
ENSG00000102606	8874	ARHGEF7	6254	4494	1969	1933	2279	2655	7802	2277	4125	4184	2910	3879	3739	2996	2092	4757	2072	1702	1906	3587	4641	3919	4870	4444	2948	2082	2476	3234	4690	4773	3162	4416	3680	4875	6162	5287	3294	1740	2011	5604	4962	3208	2867	2140	2236	2586	2156
ENSG00000131089	23229	ARHGEF9	1692	2131	1105	1120	1296	1133	1179	1200	1792	2014	1051	1506	2847	1387	1019	1548	468	533	707	1207	1754	1088	744	788	1922	1611	1625	1345	842	798	2489	1893	1280	1915	1822	1273	1414	0	6	718	1431	1140	1493	1186	1391	1380	1226
ENSG00000117713	8289	ARID1A	987	759	1346	1785	1201	784	1725	1247	1571	1614	906	1020	1069	1096	1051	1340	1009	2624	1364	1115	1407	1287	2107	1399	1239	1267	1246	1067	1036	1528	975	1032	1074	1072	1357	1396	918	1534	2071	848	1470	828	2103	1333	1128	1141	1509
ENSG00000049618	57492	ARID1B	3759	2238	2895	2457	2347	1690	3581	1845	3368	3273	2246	3444	2675	2703	2985	2783	2077	3144	2922	2545	3362	2408	3366	2871	2327	2071	1631	1634	3477	2850	761	2544	2681	2458	4833	3657	2777	3011	4228	3402	3466	3361	2390	1366	1440	1442	5250
ENSG00000189079	196528	ARID2	2825	2406	2289	4464	2470	1263	4050	1635	2374	2297	1639	1836	2428	2314	2877	1929	2221	1942	1986	1833	2124	1400	2583	2493	2080	1669	2895	2194	2375	2669	1553	1812	1651	1773	2340	1606	2960	3741	4882	1514	2412	1999	4359	2360	2880	2218	3082
ENSG00000116017	1820	ARID3A	2268	1862	871	1085	785	1043	4173	2300	27299	19689	1591	2226	2184	14683	1558	3439	5256	7093	6217	1530	1849	2419	819	1730	4338	2528	1613	1968	2451	3837	1083	3549	2277	1199	3649	1552	5143	506	758	2143	1456	1539	786	597	775	528	2668
ENSG00000179361	10620	ARID3B	401	769	420	256	282	164	834	288	627	605	222	174	240	889	247	313	448	748	803	457	603	734	605	500	340	197	379	155	249	221	398	445	206	264	521	348	544	236	323	239	527	161	705	515	734	594	182
ENSG00000205143	138715	ARID3C	55	20	20	25	26	14	16	6	12	9	27	4	114	5	4	12	25	7	13	18	24	8	11	26	113	65	34	78	26	38	53	26	35	3	8	5	53	5	11	2	38	20	24	31	30	50	10
ENSG00000032219	5926	ARID4A	1887	2049	1082	1673	1099	600	1158	879	1660	1530	793	1105	1231	962	930	1145	1070	951	1211	957	1337	1067	1178	1428	1852	1540	1505	1763	1204	1018	870	1001	1272	767	1369	569	898	1221	1546	695	1077	1151	1793	1044	1437	1576	1103
ENSG00000054267	51742	ARID4B	2270	2704	1750	2624	1474	1561	2085	1760	3371	3067	1405	2263	3142	1986	2429	2369	4394	2101	4447	1244	2007	1727	5092	3860	2423	3541	2632	3659	1280	1146	929	1705	2727	3225	4099	2171	1494	2016	2817	2004	3367	2320	3053	2896	2285	2918	2331
ENSG00000196843	10865	ARID5A	347	295	311	213	257	381	2020	317	227	286	585	216	681	499	712	375	301	572	495	354	289	411	1381	948	389	189	282	389	410	454	455	573	420	745	526	1484	784	310	605	802	377	1058	320	297	364	261	198
ENSG00000150347	84159	ARID5B	2268	2875	2698	3340	2466	1823	2017	1884	4236	4307	2545	3333	5752	3395	9136	13509	4868	5243	8353	1931	2607	1739	2529	2750	3700	3725	4821	4382	1566	1176	2148	1564	1974	3585	3030	2502	3782	1591	2830	2385	2503	2743	3921	2167	2755	3123	3885
ENSG00000166233	25820	ARIH1	5662	6599	5060	4890	4282	3704	5229	3377	4535	4166	3361	4384	4238	4972	4380	6296	5810	4895	6321	3824	7143	6339	5738	5477	5376	3596	6120	3605	2707	2489	5322	5842	4765	8682	10320	6789	5639	4173	5600	7379	10030	5047	6958	4809	5396	6035	5074
ENSG00000177479	10425	ARIH2	5925	6184	4102	4851	3405	6693	7418	6512	5457	5720	7879	6881	5220	7259	6530	5161	4887	4884	5789	6116	5251	5215	11943	11477	4697	2723	5581	4532	7567	4814	4803	10427	9059	7365	6889	6340	5877	6989	5582	6637	7150	5640	6149	4803	5140	3844	7232
ENSG00000141622	494470	ARK2C	0	0	0	0	1	0	0	0	0	0	0	0	0	0	0	0	0	0	0	0	1	1	0	1	0	1	0	0	0	0	0	1	0	0	0	0	0	20	36	6	0	0	0	0	0	0	0
ENSG00000152242	147339	ARK2N	1155	1800	2926	3049	3161	1268	1293	1340	1676	1598	1590	1383	981	1860	1505	989	997	783	1168	1475	2115	2088	3073	2166	1770	1371	2112	1525	1462	1319	2963	2118	2017	664	2020	599	886	2513	2685	1226	1938	987	10135	8543	8001	8280	1741
ENSG00000120805	400	ARL1	6187	5191	4658	9916	6367	4272	3270	4367	4565	4217	3507	4446	4499	6073	3172	3325	3767	3216	3408	4370	8577	8114	5140	3942	5254	4310	5921	4268	3533	4666	3168	4432	5494	5723	7412	4304	6670	5980	6803	4938	13043	3189	4917	3309	4034	3272	5306
ENSG00000175414	285598	ARL10	35	127	2	3	4	48	36	3	85	106	50	42	47	192	13	24	41	78	53	48	45	35	283	152	175	104	51	150	27	52	30	28	79	27	95	37	21	27	41	41	53	67	1	2	3	1	16
ENSG00000152213	115761	ARL11	172	50	1	4	2	381	14	55	572	335	617	1694	1355	961	5	31	3	0	0	354	526	296	583	1446	51	132	97	111	95	66	12	853	447	804	455	969	638	4	1	1563	1372	259	189	84	149	227	99
ENSG00000174225	392509	ARL13A	1	0	0	0	0	0	0	0	0	0	0	0	2	0	0	0	0	0	0	0	0	0	0	0	1	2	1	6	0	0	2	0	0	0	0	0	2	0	0	0	0	0	0	0	0	0	0
ENSG00000169379	200894	ARL13B	261	363	475	92	268	471	619	253	202	221	717	738	646	368	489	392	1259	838	2695	390	173	219	691	718	245	180	479	388	600	728	149	891	648	629	517	635	527	608	898	434	175	339	1766	1548	1377	1251	221
ENSG00000179674	80117	ARL14	519	621	838	1810	2823	293	110	1262	288	383	154	177	281	1273	42	76	1475	1374	1722	266	565	631	264	219	1594	1352	1255	531	202	172	316	341	248	83	124	89	68	306	167	331	316	384	131	356	210	375	189
ENSG00000152219	120534	ARL14EP	1006	1190	814	742	800	1480	1358	975	1157	1091	1072	1472	1006	1489	1671	942	784	859	1251	959	1388	1247	1162	1314	1097	788	837	1283	502	493	1072	1222	1672	1621	1214	1140	1369	800	1242	1422	1128	1412	856	555	683	706	1605
ENSG00000268223	644100	ARL14EPL	10	20	1	1	1	3	0	0	0	0	0	0	0	6	0	0	0	0	5	0	0	0	0	1	0	0	0	0	1	0	0	1	0	0	0	0	0	0	0	0	0	0	0	2	0	1	0
ENSG00000185305	54622	ARL15	580	630	424	727	728	759	539	583	1049	860	390	650	662	975	419	562	100	295	624	465	355	219	652	536	919	525	558	677	665	768	480	821	1087	924	1425	818	540	1118	1036	989	747	802	828	490	667	543	1354
ENSG00000214087	339231	ARL16	889	1361	973	935	1015	1438	1442	1192	1348	1736	922	1129	1865	1614	718	1033	1273	1512	1438	1352	1920	1696	1970	1918	2014	811	1928	1726	787	733	1921	1215	1293	1037	1288	790	914	858	841	1396	1808	1004	1799	1450	2051	1421	1200
ENSG00000185829	100506084	ARL17A	12	13	19	17	19	11	21	16	34	28	0	1	11	13	12	14	3	13	6	22	16	22	6	7	44	31	31	26	42	43	40	49	53	3	12	11	14	29	24	22	51	7	15	7	12	16	23
ENSG00000228696	100506084	ARL17B	1	3	62	23	44	4	35	54	33	31	1	0	29	2	3	2	3	6	3	31	49	64	7	6	77	63	79	49	102	83	50	166	128	0	2	1	0	44	47	80	126	4	3	3	1	4	71
ENSG00000213465	402	ARL2	2225	2702	2659	1411	2492	2521	2176	3579	2611	2658	3670	2771	1424	5401	1419	1374	932	2387	1634	2652	3628	3754	2295	2431	2989	1525	4731	2433	1666	1806	2574	2655	4209	1647	2049	1005	4814	2174	2001	2170	1518	1424	1018	990	919	870	3208
ENSG00000102931	23568	ARL2BP	2828	5041	1862	1261	1809	3589	2827	1721	1894	2077	2164	2495	2912	2882	2268	1578	2205	2823	4873	1551	2419	1531	2545	2397	1955	1249	2260	1267	2204	1774	1946	3935	3437	4564	3980	4081	2290	3925	4275	2627	2576	1767	1962	2885	1753	1796	3075
ENSG00000273003	NA	ARL2-SNX15	0	1	0	1	3	0	0	2	0	0	3	2	2	1	0	1	1	0	0	3	2	0	0	2	1	2	2	0	0	0	0	1	1	1	1	0	2	2	0	1	0	0	0	0	0	0	1
ENSG00000138175	403	ARL3	696	653	282	279	344	319	481	505	548	631	557	630	746	791	473	423	519	516	355	417	480	506	1111	1102	557	319	607	721	471	797	627	844	764	638	876	567	1003	667	897	575	349	451	1185	880	955	768	237
ENSG00000122644	10124	ARL4A	11329	17787	3032	2878	3623	4172	2754	4538	4926	5208	2901	7771	4097	6736	3785	2763	2974	3640	4779	4907	4320	5225	3371	2739	4048	3069	4354	4333	6934	7868	7790	5294	5542	5291	6441	4737	3057	4538	6075	3561	3683	4063	6026	5515	5773	6526	3946
ENSG00000188042	10123	ARL4C	250	2373	1539	925	874	666	591	173	2895	2299	1206	1738	44	2516	2178	1812	630	1643	930	89	59	165	1605	812	466	372	1617	322	848	700	1026	392	382	1290	5294	1813	143	1231	1908	1298	30	311	2016	2388	1347	1191	1782
ENSG00000175906	379	ARL4D	9	59	92	63	48	127	66	87	147	226	83	35	91	210	54	106	180	141	119	75	104	189	139	126	213	44	59	133	22	79	140	95	154	94	125	110	119	70	50	74	90	160	2	1	2	0	30
ENSG00000162980	26225	ARL5A	2945	2996	5054	3318	3626	3732	2798	3785	4227	4224	2996	3425	3582	5033	4790	4865	3863	3013	6639	3627	4038	3217	5279	4766	3727	3626	4209	3901	3715	4527	2968	6166	5546	6260	7732	6023	3732	4323	3945	4582	3738	3229	4327	3203	3748	2897	4360
ENSG00000165997	221079	ARL5B	4311	5926	3771	5539	4867	1603	4580	3364	6928	5816	2377	3217	3646	6097	2417	3158	4043	6280	5399	4666	8938	8036	6178	5862	4565	4302	4702	4095	4137	4191	3565	3763	3668	1445	3594	1337	7240	3509	4246	4445	7379	2418	6637	4293	5058	5702	2821
ENSG00000141748	390790	ARL5C	0	0	1	3	0	0	0	0	0	0	0	0	0	0	0	0	0	0	0	0	0	2	0	0	0	3	1	0	0	2	0	0	0	0	0	1	0	0	0	0	1	0	0	0	0	0	0
ENSG00000113966	84100	ARL6	349	413	393	183	368	548	575	425	318	265	383	398	450	375	587	461	437	678	1372	423	258	207	559	467	475	183	354	412	306	496	159	652	475	814	931	704	581	486	683	579	285	320	1072	672	919	684	439
ENSG00000170540	23204	ARL6IP1	16772	9592	18136	19531	17638	10843	12246	13222	11586	11524	10109	16965	16111	22716	6016	8177	12385	12058	15440	8835	15967	12884	26262	36809	16427	14532	22570	11065	23945	16023	7957	13113	20826	10692	19352	12687	16977	26677	29511	11500	7398	12832	14492	21528	12441	15510	20137
ENSG00000182196	51329	ARL6IP4	299	260	247	249	229	187	228	218	247	255	261	164	305	329	186	205	251	231	280	294	367	387	331	218	322	167	309	292	195	282	271	305	206	209	179	183	412	421	427	204	228	229	359	257	312	219	222
ENSG00000144746	10550	ARL6IP5	2700	3086	6828	9715	9471	4266	4057	5332	5161	5010	3374	4322	5372	2499	3591	3888	4865	8409	7597	5837	13053	9423	5358	4792	5282	4692	4739	2100	5093	6505	3653	5159	5155	7040	6835	6431	4333	5410	6563	8650	6924	5481	2686	1750	2991	2793	3126
ENSG00000177917	151188	ARL6IP6	911	817	1607	1715	1542	658	1286	1414	2081	2175	1358	1290	1451	1779	1033	1324	1920	1725	1439	1086	1537	1134	2106	2496	2201	2338	2594	1586	1588	1928	1213	1942	1659	546	1435	529	1299	2542	1716	581	1341	1094	2889	2724	2583	2556	1617
ENSG00000143862	127829	ARL8A	1290	1803	1074	742	947	1262	925	889	1463	1498	928	916	1417	982	1422	919	3712	1276	2877	1609	3955	3660	2417	1982	1910	2004	2006	1692	1036	1218	1336	1879	1492	2617	3432	2199	1074	1086	1538	1616	1246	1613	1768	1626	1788	2154	926
ENSG00000134108	55207	ARL8B	3986	4947	4987	4507	4535	5461	5230	4650	4893	4455	5808	7539	2672	5171	5352	5131	4082	5520	4888	3989	5755	5920	3542	4516	5274	3685	6105	3646	6132	5637	3080	6590	6255	8430	11846	7405	6914	5419	6037	7625	4823	3933	4299	3942	3602	3172	6845
ENSG00000196503	132946	ARL9	3	4	10	4	7	1	6	5	4	3	4	2	4	3	6	6	9	2	15	0	2	5	36	24	5	3	3	7	4	4	2	4	5	1	2	1	2	1	3	2	5	4	9	2	4	5	97
ENSG00000104442	55156	ARMC1	7165	8485	3863	2869	3682	4642	3108	5866	2965	3133	3170	3450	1950	5511	3098	5328	3503	3712	4530	2752	3745	4235	6601	6412	8080	5575	8008	5831	3948	5165	4614	4789	5155	2748	4473	2315	7339	3366	3319	3787	4126	2093	4150	3624	3649	3250	9748
ENSG00000170632	83787	ARMC10	3280	4567	2182	1789	1826	3016	2446	3381	2786	2698	2337	1851	2093	2543	3005	1689	4329	2801	3975	3346	4230	4516	3143	3526	2653	2288	3234	2072	3237	2980	2951	3390	3539	3421	2301	2892	1993	3226	2809	1911	2237	1999	3465	2543	3090	2782	3649
ENSG00000157343	221481	ARMC12	2	1	0	2	0	4	20	1	1	2	5	2	14	5	15	20	19	6	6	5	43	19	2	5	12	13	7	20	0	1	10	9	3	5	9	11	18	0	2	10	3	13	13	2	20	21	8
ENSG00000118690	84071	ARMC2	122	157	123	30	60	170	128	100	120	105	191	200	421	118	82	114	85	101	160	156	166	162	190	287	88	23	63	70	156	158	99	203	211	183	149	228	329	152	370	153	180	119	92	72	90	103	186
ENSG00000165309	219681	ARMC3	0	0	0	2	0	0	6	0	0	0	0	0	7	0	0	0	0	12	27	0	0	0	0	0	0	0	0	0	0	0	0	1	1	1	0	0	1	3	5	2	18	20	43	23	42	63	0
ENSG00000140691	79798	ARMC5	863	474	704	340	568	854	941	581	588	646	548	725	850	1273	507	526	662	997	1261	487	475	384	747	1009	645	252	546	412	1289	712	574	1026	923	882	1384	1122	930	1271	1560	830	515	743	361	781	353	432	1536
ENSG00000105676	93436	ARMC6	2829	3029	3780	1478	2761	2890	4426	3732	3033	3070	3119	2599	2252	5467	3472	2580	3190	3325	8592	2719	1449	1472	7398	5102	2612	1389	4202	2607	3617	3803	2363	4877	2754	3223	2686	3225	3007	3231	2500	3063	1764	2214	2780	2882	2012	1441	4878
ENSG00000125449	79637	ARMC7	292	526	790	564	785	405	702	1128	556	695	459	454	510	942	369	534	1230	1639	1302	1112	1302	1584	635	565	699	502	1151	610	349	342	1050	1191	870	688	1102	677	499	615	657	1071	1044	438	1464	1298	1144	1029	686
ENSG00000114098	25852	ARMC8	1315	1244	2664	2188	2601	1498	1867	2722	2197	2174	2389	3244	2451	3014	1755	2087	1849	2123	2801	1992	2045	1600	2639	2832	2196	1553	2644	1745	1769	1884	1340	2735	2272	2493	3226	2285	2128	1978	1918	2020	1541	1678	3078	2670	2375	2293	2690
ENSG00000135931	80210	ARMC9	460	711	724	280	581	912	634	537	605	657	696	691	412	1182	1155	846	1012	1781	1969	561	232	296	1400	836	946	590	542	1127	584	1176	611	1267	1095	1447	1608	1271	721	746	1021	1297	437	714	939	773	1034	672	395
ENSG00000126947	51309	ARMCX1	4	2	0	1	0	0	0	0	0	4	0	0	28	13	367	624	54	117	604	0	0	0	141	83	197	26	196	90	0	0	2	2	1	757	2268	389	8	0	2	0	43	0	0	0	0	0	4
ENSG00000184867	9823	ARMCX2	0	0	0	4	0	619	544	38	22	11	393	571	108	98	302	605	202	18	425	28	78	16	100	119	1277	789	149	874	0	0	0	314	138	48	55	27	10	20	33	456	4	41	72	45	65	71	27
ENSG00000102401	51566	ARMCX3	53	14	0	0	0	2178	2288	1143	2356	1925	2150	3994	4215	3437	1961	3821	1171	1705	1673	950	1864	2226	1470	1594	3174	3288	2538	2378	2021	2210	13	4556	2647	7822	8074	4754	2035	1972	2447	4728	3926	1784	2070	1474	1691	2080	1497
ENSG00000196440	100131755	ARMCX4	80	82	47	21	39	74	159	62	198	152	86	192	319	121	148	146	52	77	56	10	14	9	99	98	175	312	168	164	59	34	85	202	71	221	402	287	235	11	71	136	223	129	150	96	21	121	182
ENSG00000125962	64860	ARMCX5	1962	2171	919	995	1129	1198	1077	978	1791	1684	1301	2721	1587	2176	1182	1379	439	504	559	866	1213	1124	831	1150	1416	790	1455	1144	853	868	1021	1884	843	1600	2399	1371	1205	1340	1698	1157	1061	993	763	581	544	511	1661
ENSG00000286237	100528062	ARMCX5-GPRASP2	11	13	7	6	9	11	5	5	22	16	5	23	25	21	17	17	11	3	3	7	9	10	4	6	13	8	9	9	18	8	7	15	12	26	37	19	23	15	19	16	17	15	9	14	13	17	12
ENSG00000198960	54470	ARMCX6	1	1	0	1	0	468	442	329	686	549	594	1026	1355	718	450	661	325	342	428	245	506	337	388	401	825	561	756	539	403	416	5	786	545	1237	1133	805	388	638	804	542	425	409	703	593	647	738	369
ENSG00000198520	339541	ARMH1	61	52	8	8	1	14	9	8	6	4	11	8	49	18	10	26	29	17	12	17	32	12	3	8	50	40	20	51	7	12	43	2	9	18	19	14	16	15	10	11	15	14	15	5	7	21	1
ENSG00000260286	101928603	ARMH2	0	0	0	0	0	0	0	0	0	0	0	0	0	0	0	0	0	0	0	0	0	0	0	0	0	0	0	0	0	0	0	0	0	0	0	0	0	0	0	0	0	0	0	0	0	0	0
ENSG00000120029	79591	ARMH3	1513	1454	1597	1133	1732	1104	994	1461	1279	1348	1156	1362	1535	1220	1039	1149	1410	1557	1179	905	967	770	2335	1851	1173	923	1583	1318	1873	1671	1301	1407	1475	2083	2077	2495	2064	1660	1973	1697	1664	1390	1877	1376	1202	878	1226
ENSG00000139971	145407	ARMH4	230	104	122	55	184	85	109	10	127	143	10	11	216	20	53	106	4	6	24	14	9	10	24	18	29	30	19	30	12	10	28	22	49	16	53	7	181	37	63	33	8	291	199	124	159	168	81
ENSG00000254636	387715	ARMS2	0	0	1	0	0	0	0	0	0	0	0	2	0	0	0	0	0	1	0	0	0	0	0	0	0	0	0	0	0	0	0	1	1	0	0	0	0	1	1	0	3	0	0	0	0	0	0
ENSG00000146476	79624	ARMT1	3991	3325	3948	2969	3786	2465	3270	2351	2566	2556	2533	11245	1811	4798	2369	2703	2968	4405	4317	2953	2779	2135	2542	2638	2130	915	2807	1163	3095	2248	1470	3202	3165	3346	4893	2913	3137	3704	3870	3624	2102	2149	1938	1521	1538	1357	4778
ENSG00000143437	405	ARNT	1761	2013	1639	1709	1745	1299	1737	1586	2402	2391	1093	1708	2058	1726	1747	2720	2531	1440	2828	1651	2806	2884	2824	2421	2136	1772	2132	2345	1265	1663	1058	1730	2398	2125	3811	1542	839	1277	1927	1662	2062	2441	2271	1436	1728	1938	1909
ENSG00000172379	9915	ARNT2	5	1	22	20	12	21	298	2	19	146	6	7	3	26	56	268	24	37	38	193	236	135	59	5	14	5	12	3	1	11	6	17	7	123	1803	92	79	64	612	32	6	80	214	465	226	360	20
ENSG00000241685	10552	ARPC1A	3951	3269	2699	2509	2532	3033	2044	5848	3392	2730	1803	1856	1890	2637	2892	1433	1477	2417	3063	3128	2815	2560	3909	2825	3267	2898	4040	2197	3170	3278	1790	4826	5189	2877	1832	2145	1180	2686	2534	2004	3126	1271	3900	2592	4488	3441	4243
ENSG00000130429	10095	ARPC1B	13693	12382	5323	4037	5002	5955	4121	8802	2704	2757	3919	2869	4170	4127	3907	1761	5955	5092	8018	7507	11573	9314	6499	4893	3584	4288	6279	3125	7306	6508	5552	5206	6605	7500	4650	7183	2089	7412	7219	3849	5706	2691	7089	6755	7016	5761	4898
ENSG00000163466	10109	ARPC2	15661	18950	23100	23509	23057	13297	9533	14900	13754	14920	11609	29203	11720	19774	16142	24226	19625	23919	25798	12296	16516	12109	17950	21163	17411	15312	15825	11853	12769	12570	11058	21083	18307	48244	54058	27778	9630	27057	16964	22867	7382	7610	17072	17027	15372	11797	17882
ENSG00000111229	10094	ARPC3	7896	5487	11346	19138	13701	9150	5636	10304	10126	9309	7613	10127	11364	16145	5540	7291	9583	10251	12454	8511	14270	12819	10933	11706	10499	7692	11281	7874	8783	9736	7003	13454	12865	9857	13708	8001	11407	13940	16296	10271	16074	6669	12106	9117	8855	7407	10491
ENSG00000241553	10093	ARPC4	5422	5145	9573	4851	9343	6442	6890	6506	5421	5636	6302	9995	3583	6823	5357	4661	3131	5896	6135	4333	3711	2539	8237	8433	4862	3230	7744	4136	9072	8327	3405	9493	8885	10372	8884	10123	5980	8695	8921	9175	4130	6667	4713	5610	3909	2450	9229
ENSG00000250151	100526693	ARPC4-TTLL3	12	30	35	88	72	51	69	28	46	53	37	65	58	44	32	52	51	36	27	36	55	18	64	97	66	75	46	58	46	26	49	61	64	67	96	82	55	55	34	63	158	55	34	26	23	21	45
ENSG00000162704	10092	ARPC5	10836	7096	10686	9586	13035	7274	8994	9577	9835	10014	5664	10361	8498	9283	6915	6296	11470	7476	15563	10821	17972	11291	17935	15958	6674	8989	10736	6603	10550	11076	5321	12399	10708	12917	20010	10745	4830	11337	11108	9716	7906	9777	9778	10891	7621	8982	10641
ENSG00000136950	81873	ARPC5L	3280	2731	2814	1960	2368	1975	2207	1921	1898	2041	1556	1696	1996	3468	2724	3385	2838	2328	4459	1712	2074	1653	3241	3721	3099	1932	3328	2434	3836	2703	2296	3644	2697	2459	3020	2151	1836	2410	2147	2312	2221	1521	3175	2933	2611	1922	2958
ENSG00000242498	348110	ARPIN	1539	2245	987	1374	940	1763	1785	1197	1053	1222	1676	1418	1446	992	685	964	402	534	383	999	1441	616	1371	1667	2192	734	2621	880	1335	760	1993	932	1120	714	1271	527	1195	1531	2233	983	1844	1837	2121	1528	1480	1595	1299
ENSG00000250021	100526783	ARPIN-AP3S2	18	29	16	18	9	23	22	11	19	16	14	6	17	13	23	16	2	8	11	11	18	3	30	30	27	14	51	12	13	16	23	15	17	15	39	8	12	32	47	21	14	24	26	13	13	23	13
ENSG00000128989	10776	ARPP19	7046	7407	11121	7208	8833	4697	8749	6515	7413	7366	4886	4664	5735	10589	6817	10520	7372	8004	10453	6589	8407	6173	14087	11010	7582	7096	7857	6897	10242	10674	6647	11891	6801	8807	12038	8743	7942	9350	9907	7616	4313	9220	16757	13496	12213	12436	10357
ENSG00000172995	10777	ARPP21	0	0	0	0	0	0	0	0	0	0	0	0	0	0	0	0	0	0	0	0	0	0	0	0	0	0	0	0	0	0	0	0	0	0	0	0	0	0	0	0	0	0	0	0	0	0	1
ENSG00000120500	407	ARR3	0	0	0	0	0	0	0	1	0	0	0	0	0	0	0	0	0	0	0	0	0	0	0	0	0	0	0	0	0	0	0	0	0	0	0	0	0	0	0	0	0	0	0	0	0	0	0
ENSG00000137486	408	ARRB1	4668	3899	3744	4268	5587	2655	1864	4727	5714	6053	8857	5494	2986	4839	2739	4076	8283	6765	4176	3373	3763	2679	5803	7028	5367	4732	6713	3655	3372	2549	3321	4173	4919	1895	1581	2006	2247	4078	3245	6248	2036	2306	2851	2588	2143	2817	4025
ENSG00000141480	409	ARRB2	1723	989	925	494	643	735	1060	1153	451	560	960	882	1650	1113	1012	1484	969	1146	1779	745	799	1441	740	1349	1638	702	841	1085	1370	1039	1102	1672	1281	371	161	324	1172	967	829	558	948	647	862	582	667	570	981
ENSG00000197070	92714	ARRDC1	5572	5891	3399	2954	3527	2267	2580	1629	3820	3994	2095	1865	3190	2790	3650	3784	5764	3623	4633	2433	3810	4329	3946	3946	4543	2557	3477	2994	3388	2909	5277	2860	3252	2209	2788	2310	1715	3517	3378	3463	2247	3295	2801	2726	2205	2278	2782
ENSG00000105643	27106	ARRDC2	1771	1699	688	668	612	836	125	576	1097	1286	528	621	986	611	419	557	1625	906	1487	870	1438	1495	896	959	950	734	590	861	707	960	1057	1091	906	568	512	475	739	540	609	600	982	900	623	559	562	670	778
ENSG00000113369	57561	ARRDC3	1572	6190	1495	1649	1137	1620	2067	2308	2359	1877	1140	1554	1577	744	2257	3366	3074	2045	618	753	842	608	4467	2491	1386	1780	700	1189	3196	3748	2223	774	1350	1647	2737	1762	3851	5864	4304	1282	3392	2039	3194	1600	2518	2463	1708
ENSG00000140450	91947	ARRDC4	8107	5712	2507	5085	4698	2739	1568	1895	9619	8263	1279	566	2744	4547	630	3208	1679	1089	2255	806	2591	1220	2934	2039	1815	820	1504	974	1302	4646	2893	4432	2246	2016	3885	2077	3002	1107	1195	3929	3574	2976	1032	617	1031	916	1498
ENSG00000205784	645432	ARRDC5	0	0	0	0	0	0	1	0	0	0	0	0	0	0	0	1	0	1	0	0	0	0	0	0	0	0	0	0	0	0	0	0	0	0	0	0	0	0	0	0	0	0	0	0	0	0	1
ENSG00000100299	410	ARSA	1224	2116	763	433	915	1282	1234	662	1383	1255	1230	738	1006	1098	1053	1000	1559	1825	1251	1076	1652	1070	970	880	1014	946	1920	1196	997	1160	1820	868	1547	2218	3408	1413	1037	1070	2422	1182	866	1559	626	564	472	850	1804
ENSG00000113273	411	ARSB	117	271	329	342	294	182	444	674	208	256	269	384	142	457	219	191	112	290	338	373	218	136	292	224	569	260	533	351	559	325	128	321	366	448	552	476	490	720	476	266	219	457	1048	883	674	663	698
ENSG00000006756	414	ARSD	11552	13729	2716	3912	2961	5098	8070	2091	3064	3261	4985	13314	6790	4131	1950	1609	3854	4734	4218	5263	14006	3286	3533	8105	7360	6263	7466	4966	1510	1838	9204	7228	5021	8946	11283	5841	4159	3207	6977	9182	4293	3217	4062	3377	2765	4316	2980
ENSG00000062096	416	ARSF	0	0	0	0	0	0	0	0	0	0	0	0	0	1	0	0	0	1	0	0	0	0	0	0	0	0	0	0	0	0	0	0	0	1	0	0	0	0	1	0	0	0	0	0	0	0	0
ENSG00000141337	22901	ARSG	1	13	6	7	25	97	51	48	18	42	95	35	12	21	53	86	20	115	138	11	18	5	270	112	12	0	7	3	25	112	16	97	30	482	448	573	418	47	139	407	65	114	244	119	264	303	120
ENSG00000205667	347527	ARSH	21	34	17	34	35	5	8	18	8	15	5	12	23	6	13	16	3	6	2	34	61	39	5	3	21	12	10	2	5	5	10	10	8	3	3	8	4	8	8	16	5	8	48	22	13	16	8
ENSG00000183876	340075	ARSI	0	0	0	0	0	1	0	1	3	4	0	0	3	6	12	6	6	4	3	6	1	10	4	0	4	0	3	0	1	3	0	13	1	6	11	17	7	8	8	3	0	0	3	2	3	5	0
ENSG00000180801	79642	ARSJ	116	266	1752	3166	2152	897	1894	662	222	958	209	1231	267	105	2118	230	4344	4772	4419	169	164	186	349	379	3960	1864	4680	3560	1626	911	1010	116	276	387	113	22	519	2321	2611	987	101	3041	4173	2503	4256	5317	1370
ENSG00000164291	153642	ARSK	128	289	281	295	245	365	342	444	427	444	417	375	300	351	240	295	574	459	723	272	291	545	721	352	611	312	468	477	292	442	344	458	422	237	256	129	333	564	509	257	423	212	908	439	642	657	266
ENSG00000157399	415	ARSL	1965	2779	2358	4620	2415	4389	4261	3199	6675	5478	3683	2639	3158	4946	2091	1886	247	438	349	4067	7211	3305	1430	2233	10413	5666	5853	8164	493	924	1755	4938	2043	5675	1215	2278	7600	4122	3473	2858	2602	1789	4358	1905	3432	3851	3104
ENSG00000129744	417	ART1	1	0	0	0	0	0	8	0	0	0	0	1	0	2	0	1	0	1	3	0	0	2	0	2	3	0	8	0	0	0	0	0	0	0	10	1	0	0	0	0	0	0	0	2	0	0	0
ENSG00000156219	419	ART3	4	0	78	481	79	32	1	24	15	49	78	12	118	41	5	4	0	0	8	18	280	119	14	14	0	0	0	0	22	2	2	17	8	4	0	1	40	77	31	2	16	57	0	0	0	0	82
ENSG00000111339	420	ART4	0	0	0	0	0	0	0	0	1	0	0	0	0	0	0	0	0	0	3	0	0	0	0	0	0	0	0	0	0	1	0	0	0	0	0	0	1	0	0	0	0	0	0	0	0	0	0
ENSG00000167311	116969	ART5	15	10	1	0	0	15	228	48	44	18	25	143	61	8	35	124	8	12	8	61	122	60	68	134	107	33	48	54	40	70	7	74	160	27	120	5	21	9	0	60	0	23	5	7	7	14	41
ENSG00000117407	9048	ARTN	233	116	113	160	178	218	223	286	79	93	151	113	90	39	257	151	3287	835	1884	38	236	222	558	142	275	256	525	279	287	569	362	231	222	253	334	203	81	175	245	374	353	625	66	54	76	124	154
ENSG00000173409	64801	ARV1	1154	781	897	689	988	587	1220	994	1387	1219	730	630	781	1530	893	620	765	837	1763	384	378	269	2424	2208	995	664	1480	904	365	440	983	634	915	1147	950	863	350	635	567	949	906	796	1736	892	1348	1031	752
ENSG00000099889	421	ARVCF	1024	1629	1125	415	793	530	1440	648	505	605	1008	1115	912	445	1043	1113	1803	2623	1788	824	1054	1009	1646	965	1278	511	1418	1574	761	1348	1512	809	1400	1015	1333	1052	888	1706	2467	882	1081	2431	954	1074	584	676	1074
ENSG00000004848	170302	ARX	4	1	1	4	2	0	0	0	0	1	2	3	3	2	0	0	0	0	0	1	0	0	1	0	0	0	0	0	3	5	0	1	0	2	4	0	2	1	1	3	4	0	0	1	0	0	1
ENSG00000214435	57412	AS3MT	1	0	1	2	2	3	8	10	13	18	31	39	16	7	14	40	1	1	2	1	2	11	7	9	40	4	20	16	3	12	8	27	22	7	3	7	14	13	4	7	8	5	10	27	5	12	2
ENSG00000104763	427	ASAH1	3926	3781	9322	11722	11600	6047	7070	3817	14733	13789	5192	11718	7253	6941	2321	4246	5998	5697	5849	3922	7090	5924	7460	5819	7468	12461	8322	11568	6815	9033	6531	5013	7649	8163	7153	5733	4561	4218	11489	7137	9839	13448	6494	4224	4306	5525	4695
ENSG00000188611	56624	ASAH2	136	215	94	83	67	124	157	123	151	134	92	87	0	73	580	366	205	178	410	62	60	53	71	47	233	134	244	249	83	86	18	105	113	148	60	153	172	59	68	107	94	74	292	221	266	217	104
ENSG00000204147	653308	ASAH2B	358	534	750	509	600	289	445	370	341	333	244	227	540	489	1398	933	487	452	748	179	217	193	561	331	513	299	515	561	400	494	409	249	225	622	596	604	429	554	595	303	284	143	770	553	663	521	293
ENSG00000153317	50807	ASAP1	881	774	759	660	577	886	415	628	799	1036	557	499	946	1102	866	774	1626	2917	2702	1231	2014	2155	846	941	1195	1638	930	1000	1086	1279	642	957	1261	811	1867	679	1116	695	914	664	1329	387	291	247	217	273	2600
ENSG00000151693	8853	ASAP2	3150	3162	6719	7668	6826	2396	1858	3439	2191	2441	2498	1617	2458	2417	2753	2228	3579	4194	2814	2419	3631	3152	4005	4825	2756	2677	2706	1837	1983	2281	4181	5664	4023	2386	4707	2888	1967	3668	4225	2549	2882	1968	3100	3255	3056	3169	1869
ENSG00000088280	55616	ASAP3	71	42	176	1401	550	236	185	723	964	987	836	1613	437	692	749	1304	1629	2455	990	296	795	978	403	562	795	968	345	294	66	325	62	156	495	47	93	6	1019	217	187	302	1764	32	387	183	472	323	467
ENSG00000065802	51665	ASB1	1716	2064	1951	1349	1646	1408	1864	1519	2787	3066	1676	1898	2122	2796	1681	1945	2209	2237	1881	1440	2167	1841	2640	2517	3046	2005	2809	2898	1595	1761	1850	2690	2090	723	685	849	1658	2718	2009	1741	1159	1948	2259	1867	1903	1571	2200
ENSG00000146926	136371	ASB10	0	0	0	0	0	0	0	0	1	0	0	1	0	0	0	0	0	0	0	0	0	0	1	0	1	0	0	0	0	0	0	0	0	1	0	2	0	1	0	1	0	0	0	0	1	0	1
ENSG00000165192	140456	ASB11	0	0	0	0	3	0	0	3	0	0	1	1	1	2	0	0	5	0	0	1	0	0	1	1	0	0	0	0	0	1	0	0	1	1	0	3	2	0	0	1	1	0	0	2	0	0	4
ENSG00000198881	142689	ASB12	6	5	0	2	2	5	16	6	20	15	5	3	12	12	2	11	0	0	0	4	6	12	5	10	19	9	18	13	9	23	1	9	5	2	3	10	10	11	7	3	11	3	10	2	10	9	13
ENSG00000196372	79754	ASB13	2262	3025	2016	1883	2593	2745	2638	3977	3548	4170	3114	3448	3661	2884	4252	3067	2786	3235	4107	4545	6412	3715	3918	4961	3898	1955	3892	4312	4131	3541	3173	3886	3952	2668	4207	2191	3197	1500	1366	4443	2108	4509	2720	2057	2922	2435	3528
ENSG00000239388	142686	ASB14	2	2	3	7	2	5	16	1	3	0	1	3	12	2	19	2	1	4	5	1	4	2	1	1	3	1	3	0	3	1	4	5	0	11	53	40	0	2	3	18	36	10	2	1	0	3	3
ENSG00000146809	142685	ASB15	0	0	0	0	0	1	0	0	0	0	0	0	0	0	0	0	0	0	0	0	0	0	0	0	0	0	0	0	0	0	0	0	0	0	0	0	0	0	0	0	0	0	0	0	0	0	0
ENSG00000161664	92591	ASB16	0	0	0	1	0	1	2	1	0	4	0	0	5	1	0	0	1	1	0	0	0	0	4	1	6	4	6	20	0	0	3	1	0	0	2	0	1	1	2	2	1	0	3	0	2	3	1
ENSG00000154007	127247	ASB17	0	0	0	0	0	0	0	0	0	0	0	0	0	1	0	0	0	0	0	0	0	0	0	0	0	0	0	0	0	0	0	0	0	0	0	0	0	0	0	0	0	0	0	0	0	0	0
ENSG00000182177	401036	ASB18	0	2	0	0	0	0	0	0	0	0	0	0	0	0	0	0	0	0	0	0	0	0	0	0	0	0	0	0	0	0	0	2	0	0	0	0	0	0	0	0	1	0	0	0	1	0	0
ENSG00000100628	51676	ASB2	7	27	0	0	0	2	0	0	0	1	1	0	0	2	2	0	0	12	1	1	1	0	6	4	1	0	4	1	1	1	2	1	1	2	4	9	2	3	0	1	0	3	5	16	1	9	0
ENSG00000115239	100302652	ASB3	694	894	818	680	702	705	836	758	1150	1052	950	967	971	1375	832	979	1285	1062	1371	889	1178	1473	1143	1320	1382	849	1298	1139	687	917	779	1391	1446	1008	1338	818	816	715	911	706	1156	833	1463	997	1396	1394	798
ENSG00000005981	51666	ASB4	571	2100	486	44	117	1352	6362	362	1930	2293	6638	7478	42	762	12761	1506	646	399	83	24	12	12	19322	2791	6772	6274	8778	9456	2097	4878	9	480	2624	4517	1748	1337	43	1017	183	2496	36	191	2468	1762	2186	2084	1706
ENSG00000164122	140458	ASB5	0	0	0	0	0	0	0	0	0	0	0	0	0	0	0	0	1	0	0	0	0	0	0	0	0	0	0	0	0	0	0	2	0	0	1	0	1	0	0	0	3	0	0	0	0	2	0
ENSG00000148331	140459	ASB6	2002	2751	1730	1136	1679	1343	1384	956	1493	1424	1190	1302	1720	1978	1856	2574	1947	1803	3192	1195	1226	1400	2368	2404	2235	1236	2011	2033	2582	1970	2101	1746	2110	1718	1923	1361	1213	1815	1703	1853	1415	1610	2727	2214	2402	1756	1639
ENSG00000183475	140460	ASB7	1651	1852	1664	1695	1526	1755	1426	1511	1820	1662	1140	1244	1276	1936	1180	2072	1351	1150	1877	1193	1668	1277	1604	1669	1877	887	1900	1056	1381	1548	1475	2313	1805	1642	2060	1295	1504	1311	1665	2045	2002	1803	2228	1778	1801	1966	1632
ENSG00000177981	140461	ASB8	1512	1687	1016	1446	1391	942	1500	938	1088	1093	654	813	1553	1158	1260	894	708	850	1184	878	1108	834	1304	1319	1219	665	1383	905	761	999	851	924	964	1131	1280	1041	960	1380	1724	1051	1313	941	1236	874	1014	800	1123
ENSG00000102048	140462	ASB9	249	218	415	442	398	1031	706	581	1692	1543	1052	990	1389	1697	1432	1253	242	159	665	220	115	110	1218	223	387	286	330	282	1249	727	124	3581	1206	1006	210	629	287	1856	2013	571	165	675	603	417	428	343	1685
ENSG00000138303	51008	ASCC1	2197	2471	1650	1545	1913	1021	1161	1584	1168	1281	1356	1702	1654	1576	993	1352	1744	2184	1998	1431	1693	1354	1565	1641	1562	954	1782	1527	1368	1463	1252	1433	1645	1190	1749	1320	2549	1577	1518	1703	1441	999	1698	1384	1469	1294	1092
ENSG00000100325	84164	ASCC2	3871	4303	3026	2129	3595	1416	2373	2212	1868	1818	1854	2074	1218	3187	1406	1721	1891	3476	2870	1658	1949	1531	3108	2519	1855	1375	2189	2091	2465	2491	1414	2333	1971	2600	2886	2033	1750	2634	2595	2683	2427	1583	1448	1416	1264	968	2611
ENSG00000112249	10973	ASCC3	12563	6591	17164	9075	14513	7188	13177	8566	9132	9899	8323	11631	3934	15788	6328	4908	4121	8159	5906	7513	7589	10506	15971	14379	5299	2398	6429	3098	11760	8155	3525	11019	10483	14411	15461	13269	6594	13435	16957	8366	11504	7288	5895	4419	5077	4656	16321
ENSG00000139352	429	ASCL1	0	0	0	0	0	0	0	0	0	0	0	0	5	0	0	0	7	3	4	0	1	0	0	0	0	0	0	0	0	0	0	0	0	0	0	0	4	0	0	0	0	0	1	0	0	2	0
ENSG00000183734	430	ASCL2	2268	5526	1983	1164	1017	5865	8074	2937	16261	16682	7760	16030	6269	7057	9162	5105	408	945	756	637	651	182	6766	7786	6985	2036	3412	4769	8147	5811	4876	6073	7787	4778	7473	3623	7316	2993	5332	9389	1979	7224	3268	2477	1901	926	12806
ENSG00000176009	56676	ASCL3	0	0	0	0	0	0	0	0	0	0	0	0	0	0	0	0	0	0	0	0	0	0	0	0	0	0	0	0	0	0	0	0	0	0	0	0	0	0	0	0	0	0	0	0	0	0	0
ENSG00000187855	121549	ASCL4	0	0	0	0	0	0	3	0	1	0	3	4	0	0	0	0	0	0	0	0	0	0	0	0	0	0	0	0	0	0	0	0	0	0	19	0	0	0	0	3	0	0	2	0	0	0	4
ENSG00000232237	647219	ASCL5	60	461	26	20	9	58	250	8	873	1181	30	11	79	101	227	72	145	138	329	93	52	15	211	46	53	68	570	326	34	45	88	19	0	1268	831	296	10	143	242	90	19	215	581	495	660	1031	21
ENSG00000286053	110599588	ASDURF	12	18	19	11	16	12	16	16	19	22	13	27	20	24	26	19	14	26	37	15	16	19	20	22	23	5	21	23	28	20	17	29	30	30	45	24	12	23	15	31	25	10	12	23	18	13	22
ENSG00000111875	25842	ASF1A	2847	2427	2541	1599	2032	1221	1967	1233	1256	1326	1828	2271	1468	2266	1369	1578	977	1110	1404	1598	1576	1337	2491	2273	1418	641	1890	988	2579	2211	788	2747	2342	1593	2804	1659	1978	2100	2473	1116	1033	1638	1303	1301	1009	1319	3483
ENSG00000105011	55723	ASF1B	2365	998	3270	1403	1833	825	3319	2242	2511	3093	2646	2136	2835	2688	1642	2947	1125	1614	2811	2072	1466	992	4786	4829	2471	1318	3722	2041	3920	3307	1713	3875	2055	686	641	949	1090	3822	3210	886	800	1756	3429	3243	2891	2064	2435
ENSG00000141505	432	ASGR1	842	147	10	38	13	551	231	206	82	96	123	98	446	543	68	114	133	48	28	516	1855	2622	42	85	387	166	104	356	228	193	612	431	241	305	109	308	215	49	97	409	543	142	108	75	88	213	75
ENSG00000161944	433	ASGR2	21	43	0	0	0	4	15	4	2	2	1	24	13	220	1	15	2	1	11	5	12	32	0	9	5	6	4	8	0	5	6	7	3	11	15	11	13	0	6	2	4	0	2	3	1	5	1
ENSG00000116539	55870	ASH1L	6381	4930	2847	4064	3375	3067	3805	3994	6480	6432	2834	2952	5837	4355	4299	5241	4549	2814	5732	4376	7761	6295	9267	6734	5007	6533	4649	6184	3866	4143	3013	4676	4771	3970	4239	4573	2249	3291	4607	4096	8152	7489	7140	4304	4699	4626	5165
ENSG00000129691	9070	ASH2L	1403	1278	2827	2763	3208	837	2937	4452	2279	2326	3412	3845	1665	5371	2129	4370	2469	2777	3019	833	1007	847	1590	1676	1636	1437	2352	1939	1523	3298	1074	1200	1583	741	1002	610	1095	5378	2620	3211	2466	2244	1810	1829	1411	1368	2339
ENSG00000110881	41	ASIC1	96	324	128	150	114	787	302	326	713	766	847	443	403	400	670	293	265	137	337	381	484	401	476	473	598	224	334	774	248	527	536	449	355	232	65	213	504	389	432	560	214	660	425	196	278	308	414
ENSG00000108684	40	ASIC2	104	70	0	0	0	3	1	1	10	3	14	62	123	10	18	24	21	31	43	3	1	0	2	27	28	8	11	12	0	9	407	197	380	2	3	4	1	0	0	6	0	5	18	4	1	0	2
ENSG00000213199	9311	ASIC3	34	21	15	22	23	4	10	9	19	8	12	5	13	0	9	34	71	56	51	12	54	51	23	17	28	15	16	8	1	21	59	26	7	13	26	23	9	7	4	11	24	2	12	3	14	14	1
ENSG00000072182	55515	ASIC4	16	2	2	12	0	3	4	4	1	7	4	0	9	3	1	1	10	5	1	2	17	11	11	4	12	35	5	6	0	3	9	8	3	49	90	79	4	1	7	4	8	7	1	1	2	2	0
ENSG00000256394	51802	ASIC5	0	0	0	0	0	0	1	0	0	0	0	0	0	0	0	0	1	10	7	0	0	0	0	0	0	0	0	0	0	0	0	0	0	0	2	0	0	0	0	4	0	0	0	0	0	0	0
ENSG00000101440	434	ASIP	1	0	0	1	0	0	1	0	0	2	0	0	0	0	0	0	0	0	0	0	0	1	0	0	0	0	1	1	0	1	0	0	1	1	0	2	0	0	0	0	0	2	0	0	1	0	0
ENSG00000126522	435	ASL	10082	5694	8086	4669	8068	3950	3544	11058	5679	5705	3268	5783	4037	7508	4736	2897	6027	4838	10223	3154	4368	4094	4003	3162	4375	3637	4454	2692	5183	4002	1957	5110	6745	4595	1598	3950	1030	4548	4459	5806	4049	1758	5418	4275	5060	4212	8026
ENSG00000196433	438	ASMT	1	3	0	0	0	8	9	2	2	4	3	1	7	1	0	0	0	2	0	0	1	0	8	3	6	0	2	2	6	2	4	17	0	0	2	0	7	0	0	2	5	0	0	0	0	0	10
ENSG00000169093	8623	ASMTL	3641	4289	1100	1267	1827	2761	1441	787	1759	1697	3136	2399	3071	1177	2475	1856	1348	1043	1176	2263	2530	1394	1495	2214	1819	1080	1435	1520	2249	2729	2193	2876	2401	2823	2731	1615	3592	2240	1837	1750	1057	2328	2315	1832	2786	2695	1392
ENSG00000070669	440	ASNS	2624	4202	474	1047	440	1237	147	854	388	339	1273	174	901	449	187	315	560	360	337	1238	2226	2946	398	815	1842	1063	2217	912	645	1082	2018	2176	1198	171	278	179	1007	363	217	239	2876	152	513	212	607	946	343
ENSG00000138381	54529	ASNSD1	2201	2356	2254	1134	1709	1772	2575	1348	2250	2264	1844	2758	1569	2779	2165	2102	1714	2426	3861	1352	1370	1009	1553	1818	1748	1046	2195	1536	2068	1906	1696	2723	2167	3442	4964	3269	1852	2595	2223	2319	1684	1710	2010	2015	2044	1726	2450
ENSG00000108381	443	ASPA	1	0	8	17	7	1	0	0	2	3	2	16	20	14	1	5	0	0	0	5	13	29	0	0	4	14	9	0	0	0	3	0	0	8	3	0	16	8	13	0	47	0	8	1	7	10	5
ENSG00000204653	554235	ASPDH	0	0	0	0	0	0	0	0	0	0	0	0	0	0	0	0	9	4	18	1	1	0	0	0	0	0	0	0	0	0	1	0	0	0	0	0	0	0	0	0	0	0	0	0	0	0	0
ENSG00000166183	374569	ASPG	6	5	6	3	4	6	13	14	10	6	3	27	58	15	15	25	8	3	0	4	2	0	6	41	5	6	3	4	7	27	1	5	2	23	534	39	5	0	1	24	5	0	11	38	38	36	2
ENSG00000198363	444	ASPH	41541	37486	23041	44233	35762	27527	10331	46996	17517	15839	12880	16079	8220	14060	8932	25236	9245	37354	7859	9313	10903	18450	29531	21559	53984	66365	63179	28103	15439	19625	24646	21491	32700	11685	21617	10531	29408	11649	14472	19632	24825	12433	35435	38910	22054	29311	52663
ENSG00000174939	253982	ASPHD1	25	74	44	51	13	203	3	173	180	107	475	395	222	106	295	108	413	427	493	496	685	293	57	125	51	68	24	31	181	165	5	1007	909	379	237	178	52	186	172	251	217	326	118	149	121	138	214
ENSG00000128203	57168	ASPHD2	439	390	123	104	122	38	26	9	21	50	56	87	60	19	269	119	28	37	48	35	41	65	49	55	28	20	7	62	27	85	41	47	81	38	26	36	51	81	80	66	34	200	201	107	285	228	14
ENSG00000066279	259266	ASPM	3478	1764	6154	4479	4111	1057	7971	3130	5563	5775	2653	2671	4439	6859	3939	4056	3688	1897	5491	4604	4391	4879	16710	10393	4941	3717	5691	5139	7434	6023	1980	5898	4390	807	972	1697	2320	5227	4595	1451	3093	4725	17060	9277	12334	10062	4867
ENSG00000106819	54829	ASPN	0	0	0	0	0	0	0	1	0	0	0	0	0	0	0	0	0	0	0	0	0	0	1	0	0	0	0	0	0	0	0	1	0	0	0	0	0	1	0	0	2	1	0	0	0	0	0
ENSG00000244617	151516	ASPRV1	2	0	0	1	3	0	6	0	4	1	1	1	0	0	0	2	0	1	0	1	0	0	9	1	1	0	0	0	1	1	0	1	1	6	17	7	1	1	1	2	3	0	0	1	0	0	0
ENSG00000169696	79058	ASPSCR1	2055	4831	1398	596	1146	1498	3602	1788	3629	5252	1485	3001	1808	2909	1931	1886	1951	2138	2419	2085	2763	2221	2834	2589	1779	795	1936	1539	1155	975	3283	1973	1852	6895	13719	3085	2013	1586	2077	2336	1601	1661	4351	3011	2377	3675	1529
ENSG00000162174	80150	ASRGL1	365	447	1428	1671	1285	298	103	934	131	105	938	186	411	868	334	486	843	1206	1008	1297	971	635	174	482	785	141	2426	466	467	605	90	1807	1933	790	308	662	346	558	1049	193	215	188	783	562	1123	534	2678
ENSG00000130707	445	ASS1	54376	47024	33413	67630	36054	14373	10379	12254	12084	8727	26376	16757	17873	7377	17732	34977	43159	12498	41965	12133	22779	17268	12770	18194	17181	15840	12246	9985	11901	14518	22645	15181	13774	13493	19914	12298	22160	11523	12131	29009	32329	8405	11225	6456	6787	16054	11088
ENSG00000034533	28990	ASTE1	610	395	685	646	718	428	398	967	463	445	590	595	1076	1053	419	457	383	364	834	411	685	844	538	787	705	445	650	500	529	542	395	798	832	375	339	271	410	522	609	346	772	409	679	681	577	465	764
ENSG00000188886	431705	ASTL	18	21	1	12	14	13	130	21	43	22	29	182	43	10	9	15	24	11	13	24	22	10	13	16	13	13	11	15	3	25	24	17	14	5	4	5	14	6	5	6	16	12	19	14	18	22	16
ENSG00000152092	460	ASTN1	0	0	0	0	0	0	0	0	2	3	0	0	0	0	0	0	7	2	169	0	0	0	0	1	3	0	0	0	0	0	0	0	0	0	0	0	0	0	0	0	0	0	0	0	0	0	0
ENSG00000148219	23245	ASTN2	116	289	559	276	359	286	424	173	409	427	171	249	193	524	183	316	226	127	271	168	151	133	200	180	533	539	324	382	92	94	490	293	357	234	137	159	121	581	606	264	244	320	418	260	440	345	395
ENSG00000171456	171023	ASXL1	2436	3578	2904	2391	2145	5273	4194	5551	5941	6062	4395	6029	6688	6924	5871	5981	4926	3881	5717	4590	5833	7958	6366	6386	4825	4342	3674	5382	8174	7678	3427	5398	7743	4917	4822	3757	4811	3947	5080	5341	8359	7897	5281	3231	4250	4209	6972
ENSG00000143970	55252	ASXL2	1763	1397	1563	1516	1082	1066	2405	1295	2035	2093	1466	1633	1614	1556	2308	2148	1524	3494	2009	1466	1890	1538	1735	2057	1618	1806	1752	1381	1513	1612	1378	1753	2142	1793	2126	2155	1250	1452	2070	2406	2803	1548	2489	1674	1670	1541	1986
ENSG00000141431	80816	ASXL3	1	0	3	0	1	0	4	0	1	1	0	0	4	0	1	0	0	0	0	0	2	0	0	0	0	12	0	2	0	0	0	0	0	0	0	0	0	0	0	0	1	0	40	20	3	38	1
ENSG00000154438	136991	ASZ1	1	2	0	0	0	0	0	0	0	0	0	0	0	0	0	0	0	1	0	0	2	0	0	0	0	0	0	0	1	0	0	0	0	0	0	0	0	0	1	0	0	0	0	0	1	2	2
ENSG00000138138	84896	ATAD1	4731	5397	4854	6734	5639	3525	3313	4519	3580	3815	3112	2973	4860	4219	3192	3899	11734	5414	6364	3445	6445	6515	6633	6775	8225	7209	9596	9744	4226	5733	6318	4747	4791	4508	4810	4339	10935	4968	4853	4590	7664	4531	8562	6197	6574	7630	3934
ENSG00000156802	29028	ATAD2	6890	3725	9388	5736	5476	2273	5614	7442	4147	4829	4751	4909	6759	8177	4306	6611	4588	4250	5269	13128	13499	13446	13199	15905	13715	7590	15472	13166	16708	10560	6313	7668	7233	1507	2947	1721	7225	6353	5479	2441	3976	2420	5724	5094	4338	3411	16429
ENSG00000119778	54454	ATAD2B	2013	1948	2006	1764	1644	1239	2012	1666	2042	2095	1700	1836	2050	1809	1963	2174	2282	2416	2864	1728	2341	2198	1561	2522	1179	966	1631	1448	1672	1961	1312	2227	2569	1797	3274	1660	1462	2004	2320	1612	2148	1608	1943	1751	1639	1502	2167
ENSG00000197785	55210	ATAD3A	3488	2998	4960	1911	3688	1834	2914	4105	1512	1717	2557	3127	1424	4731	3128	3875	2183	4478	3907	3240	2237	1748	6956	5079	1838	927	2720	1680	4884	3902	2099	4953	3340	2717	2612	2451	1607	4801	2910	3741	2853	817	2549	3236	1942	1231	4568
ENSG00000160072	83858	ATAD3B	4453	3124	4568	1770	2781	1430	1953	2394	1502	1712	1625	2012	1823	3476	2322	3858	3123	4711	4022	2275	2952	2695	5672	3703	1810	1126	2185	2150	3969	4167	1899	3251	2686	2263	3102	1947	1424	6544	3428	2933	3481	956	2375	3186	1835	1570	4703
ENSG00000215915	219293	ATAD3C	55	15	3	12	9	39	174	298	59	51	93	226	57	68	37	43	39	12	8	1	23	15	162	185	48	52	61	26	7	3	4	244	130	140	168	171	7	10	5	205	64	131	4	2	6	19	81
ENSG00000176208	79915	ATAD5	1110	524	1165	807	694	466	1477	1205	1285	1892	1550	1081	1128	1934	925	1056	841	887	1289	988	1058	707	2131	2184	1677	824	1692	1656	1134	854	1403	1625	1071	392	431	494	735	1409	1114	616	918	922	1525	866	673	607	1035
ENSG00000137343	79969	ATAT1	167	143	135	138	138	91	189	199	113	89	115	148	137	161	91	170	161	224	202	144	212	210	170	198	95	53	207	184	174	223	86	156	304	112	135	87	200	74	138	123	166	137	56	65	63	36	218
ENSG00000167654	85300	ATCAY	0	0	0	1	0	0	0	0	0	0	0	0	0	0	0	0	3	0	3	1	3	4	0	0	0	0	0	0	0	1	0	1	0	0	0	1	0	0	0	0	0	0	0	0	0	0	0
ENSG00000107669	11101	ATE1	5175	4432	4123	7182	6146	2763	4405	7177	8072	7218	3743	3881	5267	7143	3575	4610	3927	5010	5608	2085	3043	2692	5054	4861	10004	11082	6519	8053	3902	3639	2544	4463	5547	4511	4956	5200	8106	4162	4427	3621	4562	4678	5851	4126	4350	4403	4052
ENSG00000123268	466	ATF1	1609	1513	1588	2551	1502	1444	2076	1893	1352	1285	1321	1416	1963	2212	2125	1427	1097	862	1297	1560	1911	2110	2015	2127	1664	1171	2048	1386	1371	1529	1054	2020	1692	1258	1293	1266	2253	1997	2144	1067	1967	1471	2054	1714	1739	1679	2220
ENSG00000115966	1386	ATF2	2293	3286	3029	2475	2474	2545	1934	2441	2862	2245	2659	3451	2787	2543	2991	3176	4309	4495	4223	2305	2629	2650	2242	2418	2793	2776	4302	3054	2219	2408	1886	2906	4053	4835	5637	3479	2615	4207	4526	2339	2471	2107	2618	2579	2186	2767	3417
ENSG00000162772	467	ATF3	4519	6217	1359	1784	2184	235	565	638	150	92	197	149	1573	281	28	268	1346	813	1764	400	1331	2335	190	485	1212	1088	512	257	417	470	968	405	482	250	364	190	761	170	176	229	1957	391	272	303	315	837	260
ENSG00000128272	468	ATF4	63107	57730	26117	47526	32351	26315	20032	26128	31992	29334	21689	14871	26280	37458	17105	28187	24707	22425	17663	24995	42217	42218	25146	29552	39213	26863	39470	33126	20782	32746	40434	34936	30090	12909	17703	8934	36361	19562	15285	12456	40678	28055	19389	14654	19307	20999	22583
ENSG00000169136	22809	ATF5	456	362	383	225	344	253	179	288	273	284	128	194	159	277	182	243	122	153	448	184	231	151	385	255	287	195	196	113	296	132	245	323	159	203	442	217	80	660	557	423	126	226	260	263	202	199	580
ENSG00000118217	22926	ATF6	8436	8876	4209	4402	4565	5041	4084	3103	5957	5929	3694	4700	5160	4294	4005	4784	6130	2829	6555	5135	8321	9827	9264	7338	5172	4479	4613	5492	4274	4710	4350	6177	6472	8277	11729	7235	3838	4003	4950	6416	14046	5792	5997	4378	4981	5741	4358
ENSG00000213676	1388	ATF6B	2681	2366	1581	1003	1317	2431	2184	2785	2261	2181	2688	2758	2806	1628	1418	2307	2203	2233	2363	2026	2949	2417	3347	3546	1679	819	2834	2945	1729	1771	1680	2269	4436	2644	3755	2703	3335	1473	2019	2044	1278	1730	1334	926	1134	1425	3393
ENSG00000170653	11016	ATF7	398	322	295	509	272	206	468	381	340	318	207	203	295	481	408	224	225	392	254	372	499	405	320	290	293	449	384	272	306	372	219	290	304	215	199	293	363	538	643	291	698	297	459	310	264	211	473
ENSG00000171681	55729	ATF7IP	3724	2837	3599	7131	3889	3627	5516	2887	4033	4070	2378	3832	5634	5426	4568	4198	5091	4587	4519	5431	10622	12168	3740	3649	5587	3758	4028	4359	3374	5061	2705	3062	3810	4850	6490	4883	4542	5480	6097	4434	6414	5208	7871	4222	7646	6683	4788
ENSG00000166669	80063	ATF7IP2	0	0	807	727	765	0	429	278	1292	1049	735	906	0	1186	0	38	587	144	719	645	1384	846	79	1	7	4	5	1	463	511	0	653	1374	2	0	0	953	1134	954	307	2	520	188	260	24	233	687
ENSG00000267281	114108587	ATF7-NPFF	0	0	0	0	0	0	0	0	0	0	0	0	0	0	0	0	0	0	2	0	0	0	2	0	0	0	0	0	0	0	0	0	0	0	0	0	0	0	0	0	0	0	0	0	0	0	0
ENSG00000152348	83734	ATG10	181	442	389	372	419	445	242	359	305	349	391	615	346	459	287	248	363	470	335	488	487	248	532	393	900	374	652	694	230	226	608	371	591	562	668	396	280	601	448	322	522	379	734	401	724	630	628
ENSG00000123395	60673	ATG101	2742	3010	2748	3561	2810	1896	2189	2256	1735	1753	1494	1549	2532	3370	2650	1502	1783	2414	3119	2985	3727	4016	3177	3085	1992	1445	3108	1423	2097	2620	2069	2583	1858	2201	2519	1886	2584	3746	3582	2608	3336	1649	3662	3233	3269	2157	2069
ENSG00000145782	9140	ATG12	2891	4562	2222	3948	3276	2311	2621	2115	3090	2811	1679	1763	3331	2675	1781	2375	3371	2791	5217	2292	3698	3157	2315	2278	2859	1399	1687	2558	2497	3007	2582	2612	4547	2743	3329	2569	2033	2922	2302	2421	3502	2689	4085	2298	3824	4112	1890
ENSG00000175224	9776	ATG13	3032	3562	2467	2234	2642	2887	2357	2591	1965	1785	2525	3705	1627	4215	1493	1850	2236	4450	3426	2923	6485	7370	2289	2586	3337	1846	2184	1921	2449	2522	1675	3708	4522	2912	4911	2586	3094	1975	2627	3748	3797	2324	1496	1342	1243	1322	3863
ENSG00000126775	22863	ATG14	732	978	858	931	735	693	982	1151	1056	957	472	819	609	958	711	1019	1051	1245	1232	518	716	743	787	647	1404	1200	1411	1242	837	654	803	687	754	693	1117	491	839	1203	1649	666	521	824	1154	905	994	1169	1086
ENSG00000085978	55054	ATG16L1	3484	3788	6839	3669	5809	3251	2485	3094	4475	4402	2944	3923	3011	4362	3112	3855	4514	4895	5657	2332	3965	3732	6857	4843	4005	4283	3834	3339	4290	4027	4080	5153	4725	5545	8477	5795	2597	7962	5361	5426	2613	2710	3223	3804	3445	2768	4258
ENSG00000168010	89849	ATG16L2	247	249	309	346	375	211	626	381	531	478	328	325	268	400	151	488	532	465	252	377	453	479	570	553	1085	501	800	715	330	454	491	581	600	79	105	100	402	375	393	148	391	444	535	304	256	411	367
ENSG00000110046	23130	ATG2A	2305	2135	2019	1533	1507	2036	1766	2120	2021	2100	1962	2723	1861	2316	1884	2066	3178	4446	3466	1833	3297	3495	3741	2932	2267	1538	2522	2010	2250	2101	1770	2416	3672	2972	3276	2902	2019	1675	2478	4443	2641	2427	1086	911	1130	1186	2680
ENSG00000066739	55102	ATG2B	2811	3507	1442	1137	1043	1276	2303	632	1037	951	1434	1629	1678	1235	1599	1477	1078	1539	1445	1554	1722	1624	1428	1617	2247	1153	2678	1847	2001	1712	1609	1564	1669	1205	2460	1285	3379	2407	3378	1232	1676	1270	3174	1812	2091	2164	1792
ENSG00000144848	64422	ATG3	1867	2094	3246	2432	2971	2283	2768	5123	2049	2294	3485	3786	3140	4411	3235	2957	2924	4107	5475	2735	2692	2819	3917	4060	2149	1465	2895	1559	3571	3284	1624	5289	3896	2916	3100	2780	2126	3798	3098	3312	3382	2242	3833	3392	3118	2363	3959
ENSG00000101844	115201	ATG4A	1773	1362	1098	597	1194	889	775	851	467	441	736	1249	895	712	778	743	183	510	744	686	571	799	1341	1063	443	298	756	318	761	728	468	1789	791	1776	2406	2014	768	1719	1886	1171	1249	333	998	914	1837	706	493
ENSG00000168397	23192	ATG4B	3390	3242	3226	2089	3129	3089	3221	3100	3294	3462	2965	3217	3708	5125	2708	3511	3619	4739	4495	3197	4442	3091	3862	4318	5171	2689	4293	4036	3261	3661	3322	4848	4641	4445	6097	3841	2834	4039	3249	3431	2106	2927	3166	2953	2732	2603	3933
ENSG00000125703	84938	ATG4C	873	838	638	507	647	685	787	586	575	622	474	574	404	714	377	361	571	627	728	690	690	823	735	684	479	423	1097	690	497	654	528	575	582	450	522	311	386	560	682	528	988	758	656	418	573	476	578
ENSG00000130734	84971	ATG4D	2015	2572	1769	1502	1716	1177	1949	1312	2652	2722	1068	791	1324	1800	1620	1926	1799	1347	3446	1012	1225	1446	2853	1791	3324	1992	2963	1841	1367	1805	1502	2068	2167	1525	1525	1552	1047	1901	1417	1095	2200	1157	1431	1357	1307	1147	1493
ENSG00000057663	9474	ATG5	5759	3822	4710	4441	4532	2967	2946	3906	4136	3947	3871	6024	3487	6021	2416	2565	2420	2704	3558	3153	4622	4490	5798	6112	3825	2160	3609	1830	3910	3017	2143	5579	5157	2870	4198	3311	4121	3042	3290	3462	5723	2552	2289	1974	2046	2541	6259
ENSG00000197548	10533	ATG7	1076	1427	1828	1601	1855	2151	1680	1664	1540	1569	1786	2473	1183	1908	1322	1178	1055	1575	1429	1406	1527	1343	1785	1757	1555	1395	1705	1458	1616	1578	1055	2341	2346	2338	2571	1825	1745	1909	1934	1935	1876	1512	1010	1259	795	784	2438
ENSG00000198925	79065	ATG9A	2060	2383	3240	2162	2378	1936	1795	2376	3067	3322	1916	2634	2067	3099	2322	2381	3140	3698	3642	2677	4300	4395	2238	2291	2846	2160	2318	2714	1833	1986	2761	2909	2578	3092	4610	2603	1711	2203	1705	3365	1996	2090	1653	1318	1708	1580	2059
ENSG00000181652	285973	ATG9B	498	398	49	25	22	132	171	89	47	62	15	31	125	19	76	39	54	153	8	93	132	100	315	172	95	41	32	107	54	45	735	113	91	271	182	618	42	34	53	344	240	164	19	20	34	32	5
ENSG00000138363	471	ATIC	1320	1220	1424	830	971	963	1907	1078	1666	1618	1211	1190	1232	2078	1416	1271	1413	2861	1886	1142	1418	1109	1084	1240	1677	1057	1371	1552	1065	1201	913	1482	1549	1601	1688	1642	1076	2231	1584	1614	924	1006	2084	1409	1362	1101	1755
ENSG00000198513	51062	ATL1	522	356	17	35	47	77	84	553	150	97	114	334	274	66	43	190	8	21	24	222	197	24	55	114	345	215	274	180	417	474	61	176	261	213	493	177	471	115	310	461	89	165	504	308	338	296	65
ENSG00000119787	64225	ATL2	4680	4629	5362	4680	4147	3572	4481	3976	5808	5367	5513	4779	4472	6710	3709	4461	8785	7585	9958	5474	10793	9752	7845	7894	7244	4170	9252	6211	4632	4272	3887	7007	7841	4437	5604	4194	4006	3714	3624	4743	5279	3297	6860	5365	6763	5693	4870
ENSG00000184743	25923	ATL3	4067	4271	7684	7983	7484	3788	2040	8669	2674	3209	1912	3159	2889	1726	2871	3197	5536	9873	9152	2471	5208	4482	6482	4905	6276	6882	8529	4271	7943	5005	592	2929	5190	7419	9884	6628	3304	6586	7975	4929	5106	3854	6166	4395	5126	4412	6993
ENSG00000149311	472	ATM	3716	3597	2962	1996	2395	6690	6864	2702	4513	4445	5743	5560	3578	4405	2954	3140	5044	4060	4208	2978	4512	3343	2348	2106	4506	3067	4808	4079	3093	3584	4028	3429	5416	5013	4370	4217	5764	4380	6537	6539	13450	4278	8382	4972	4102	5067	5197
ENSG00000166454	23300	ATMIN	5488	7471	5514	4048	4949	7410	5813	4102	4345	4713	4227	6219	4877	5559	4913	3830	6009	5043	8222	3489	4967	2793	4237	4061	3135	2279	4843	3216	6212	6216	3781	6757	5923	6725	9610	6829	5178	7132	10681	4356	3245	5131	4843	6952	3522	4714	9085
ENSG00000111676	1822	ATN1	244	259	199	619	230	138	418	136	297	257	213	145	295	216	249	267	237	633	150	444	804	595	308	219	451	675	419	326	185	255	230	216	281	141	214	222	445	345	438	237	572	270	532	318	291	355	308
ENSG00000172238	474	ATOH1	14	3	180	394	368	1	0	0	0	2	1	0	21	2	0	0	1	15	0	1	2	0	0	6	7	0	67	1	55	0	1	0	0	0	0	0	76	0	0	0	13	0	23	0	25	9	158
ENSG00000179774	220202	ATOH7	2	6	4	12	4	8	6	52	8	7	4	3	17	30	5	13	21	10	3	3	6	6	10	4	54	13	37	53	16	21	8	3	12	1	1	2	27	5	13	1	13	13	33	19	24	20	28
ENSG00000168874	84913	ATOH8	30	15	981	1168	1702	451	419	456	2114	2211	1212	2846	253	397	2076	2624	41	184	25	8	6	1	81	93	158	37	120	60	7	3	0	131	442	108	248	15	170	28	503	422	3	122	140	71	87	54	1141
ENSG00000047346	56204	ATOSA	583	451	346	642	483	346	536	309	413	378	204	385	429	395	481	560	158	343	318	312	597	385	379	305	356	282	247	247	242	396	261	422	299	718	838	786	531	356	885	712	579	737	409	266	341	458	455
ENSG00000005238	80256	ATOSB	810	674	1618	1310	2320	737	188	552	425	572	213	364	716	489	261	583	482	783	1013	271	725	643	631	862	851	1310	1404	504	368	504	716	590	867	1337	1670	1667	517	719	987	1171	1272	1317	135	149	201	296	280
ENSG00000177556	475	ATOX1	1000	1444	1722	966	1484	1502	1141	1340	1219	1353	692	1358	1080	2541	3992	3750	1419	2732	4128	1570	1859	1964	2649	2202	1272	670	1036	1010	1769	1470	915	1270	2258	1723	1843	1646	926	1989	1478	2731	1412	913	1909	1237	1577	1158	1252
ENSG00000206190	57194	ATP10A	156	0	0	0	0	0	2	0	0	0	0	0	0	17	4	0	0	2	0	0	21	12	0	0	0	0	0	0	163	242	0	0	0	6	23	45	1	0	1	2	0	0	1	0	0	0	0
ENSG00000118322	23120	ATP10B	9083	4016	7469	8367	9877	4640	5108	3303	17846	17190	1296	5105	8940	6712	4546	7175	1826	808	1263	1680	3253	344	1900	9755	7558	10376	4665	2340	3323	3186	9115	2182	7287	5817	4396	7702	1293	12392	11070	6057	27419	8313	10619	4807	6333	5923	5549
ENSG00000145246	57205	ATP10D	427	561	176	198	344	353	427	106	43	187	32	508	294	64	69	263	18	184	119	62	41	25	63	68	7	9	15	17	33	47	111	33	36	844	1076	605	53	807	1273	262	475	330	540	422	736	512	1130
ENSG00000068650	23250	ATP11A	4525	3471	1193	805	893	1209	5370	1104	1891	2092	1501	1300	1667	1784	1712	1457	1291	2133	1249	2741	3563	2787	4361	3524	867	900	1323	997	2975	3001	2580	2739	2015	2888	2629	4648	2742	1558	1920	3436	3267	2027	2513	1579	1557	1892	1802
ENSG00000058063	23200	ATP11B	5425	6499	9455	15664	12751	6592	5235	10144	6761	7067	6870	8503	9411	6544	5437	5842	19017	14792	17711	5637	8250	7418	7427	8758	11438	10122	12458	6692	6711	6518	4116	12648	11616	4895	4706	5754	3826	6782	7799	9733	8685	6144	8909	4760	7691	8130	8591
ENSG00000101974	286410	ATP11C	1277	1867	2163	2832	2355	2413	3710	3418	3035	2741	4504	5495	5066	4681	5195	4693	1752	2503	2413	3479	2877	1744	4551	5174	2994	2240	4350	3709	2944	2843	2640	7689	3461	8289	9612	5049	2730	4985	4665	3293	1788	1687	5342	3735	4146	3429	5235
ENSG00000075673	479	ATP12A	0	0	0	0	0	3	8	5	1	0	0	3	0	4	9	690	93	17	301	4	15	9	34	11	381	522	248	47	0	0	0	5	12	46	22	31	0	9	3	13	8	0	31	11	40	35	80
ENSG00000105726	57130	ATP13A1	2424	2007	2494	1427	1935	1585	3022	1321	2571	2901	1752	2148	1765	2791	2563	1981	1888	2233	4232	1560	1331	1115	1809	1306	3000	1470	3202	2129	2802	2687	1814	2624	2175	2535	2909	2887	2413	2779	3346	2659	1653	2083	2017	1574	1358	907	2916
ENSG00000159363	23400	ATP13A2	13250	8013	8032	4108	7754	4992	3043	3643	3751	4245	5266	3748	4030	3483	2728	3034	3543	8191	7258	3435	3899	3197	9821	6691	2444	2357	3610	2291	3768	5853	4511	4439	5218	7226	10655	10091	3256	6770	8565	4191	2428	1847	3796	3038	2797	2496	5959
ENSG00000133657	79572	ATP13A3	7600	5136	13091	14752	12238	5504	16346	16898	13738	13581	10999	13204	19620	16860	13677	12097	17954	17556	19483	13285	19213	17547	14914	16084	13771	9927	15536	12449	9796	10680	8153	18596	14071	11056	10659	10565	14692	11284	11593	10743	11812	11188	21843	14035	14947	14389	16601
ENSG00000127249	84239	ATP13A4	1	5	1	6	7	10	2	9	12	11	14	6	37	5	1	9	1	0	2	10	26	11	3	3	13	10	1	11	0	7	23	9	7	6	14	9	24	7	6	8	28	1	6	4	11	23	8
ENSG00000187527	344905	ATP13A5	0	0	0	0	0	0	0	0	0	0	0	0	1	0	0	0	0	0	0	0	0	0	0	0	0	0	0	0	0	0	0	0	0	0	0	0	0	0	0	1	1	0	0	0	0	0	0
ENSG00000163399	476	ATP1A1	48603	39837	8628	7638	7347	23042	37989	16249	27394	33368	17493	13582	24872	23708	33825	8892	10333	23215	19342	28091	49220	30889	25537	26469	15576	18364	15884	14352	22823	25949	33974	29587	32280	93122	54126	82307	21193	30630	41890	36368	37471	39479	18714	11174	10086	11232	22502
ENSG00000018625	477	ATP1A2	0	8	1	0	1	0	0	1	3	8	1	3	8	1	0	0	3	1	2	2	6	3	3	4	2	0	1	2	0	0	1	2	0	2	6	4	0	1	0	4	0	0	2	0	0	0	0
ENSG00000105409	478	ATP1A3	0	1	0	1	2	2	1	0	4	6	26	6	2	6	1	1	3	4	5	0	4	0	14	6	4	1	1	3	0	2	0	47	3	1	1	2	1	0	0	3	5	0	27	9	34	9	0
ENSG00000132681	480	ATP1A4	0	0	0	1	1	0	0	1	0	0	0	0	0	0	0	0	0	0	0	0	0	1	0	2	0	0	0	0	0	0	0	1	0	0	0	0	0	0	0	0	0	1	0	0	0	0	0
ENSG00000143153	481	ATP1B1	20184	10807	23883	23264	27814	11450	13521	7076	27124	27122	10230	29992	14714	10980	13079	24754	7781	4445	9820	7368	17325	7513	19895	19384	7025	13939	9763	4292	19486	15009	8559	24537	32606	27256	38118	21729	6699	19276	21364	17852	33328	15057	10675	8387	7885	10313	20897
ENSG00000129244	482	ATP1B2	0	0	0	0	0	2	4	0	5	1	3	0	0	4	1	0	2	4	2	0	2	3	1	2	1	1	0	0	0	2	1	1	0	1	0	2	2	1	0	0	3	2	0	0	1	0	2
ENSG00000069849	483	ATP1B3	5518	5190	9093	5546	8373	7151	8393	9282	5166	5445	7745	10460	8479	12323	6441	6331	12602	10573	15597	8555	8402	5944	7806	11768	6450	6661	7869	6122	7183	6252	7049	10628	10055	8390	6405	7605	7531	10445	9164	11140	8473	6245	11884	9444	7628	7698	9013
ENSG00000101892	23439	ATP1B4	0	0	0	0	0	0	0	0	0	0	0	0	0	0	0	0	0	0	0	0	0	1	1	0	0	0	0	0	0	0	0	0	0	0	0	1	0	0	0	0	4	0	0	0	0	0	0
ENSG00000166896	91419	ATP23	298	307	313	357	220	164	206	230	195	224	240	60	230	193	261	172	151	124	130	216	207	170	219	205	229	156	268	178	263	309	143	171	220	155	141	93	227	578	430	46	288	164	266	257	261	198	266
ENSG00000196296	487	ATP2A1	16	6	61	141	106	41	27	24	15	22	34	24	68	57	14	31	49	55	21	23	90	53	22	71	74	36	46	28	19	35	56	94	44	14	89	21	51	41	23	24	132	23	20	31	22	69	16
ENSG00000174437	488	ATP2A2	7335	4139	5935	9188	5476	3216	5007	7148	5525	5917	3364	3496	6049	6066	4321	3794	5556	8535	7749	5526	11069	10018	6136	5212	7961	7552	9901	6374	5437	5967	4965	8707	7371	3504	3951	4110	6445	9787	11131	5157	14052	5856	11700	6766	7001	5337	8127
ENSG00000074370	489	ATP2A3	1159	61	1015	1537	1168	73	278	620	687	1022	168	52	1005	568	1044	137	1748	1476	1093	257	707	1107	112	178	1541	874	335	1434	76	442	22	10	57	107	47	162	3076	1557	1438	155	85	384	3400	1704	3140	2978	56
ENSG00000070961	490	ATP2B1	7802	10330	7378	7651	9155	5111	3351	5989	2729	2569	3099	4044	2857	7251	1225	1804	4985	10068	9072	5325	4570	3233	6991	6410	3721	3955	8310	4801	5313	7264	4637	5894	8220	1410	3342	929	6409	6528	7930	4489	7536	4018	14001	8601	8442	7628	12648
ENSG00000157087	491	ATP2B2	0	0	0	1	0	0	0	0	0	0	1	0	1	0	0	1	2	0	0	0	0	0	1	2	0	0	0	0	1	0	0	0	1	7	1	1	2	0	0	1	0	4	0	0	0	0	0
ENSG00000067842	492	ATP2B3	2	0	0	0	0	0	0	1	3	0	0	0	1	0	0	0	3	1	0	0	0	0	1	1	3	0	0	11	0	0	0	0	0	1	0	0	1	0	0	0	0	0	0	0	0	1	0
ENSG00000058668	493	ATP2B4	3321	3199	283	1212	298	607	346	180	4496	4875	551	2434	1571	442	839	1036	2040	2173	1004	1889	3763	2848	1419	2262	1436	2098	853	253	461	1432	839	657	633	273	597	359	430	526	431	1020	3383	771	831	404	1036	978	882
ENSG00000017260	27032	ATP2C1	3057	3481	5274	7207	5628	5737	5208	7379	5173	5268	6626	10444	6306	6049	5129	4115	3378	5719	8585	6460	6562	5609	5775	5001	4946	4547	6864	4797	5549	5560	3048	6640	5632	6890	8783	5815	5480	6203	7190	5775	5663	4262	7679	5616	5222	5207	7731
ENSG00000064270	9914	ATP2C2	7615	9634	5104	5111	4586	4183	4418	3342	2569	4141	3472	1190	4806	3677	1903	1444	753	939	3149	2122	2683	1883	1843	2980	3405	1577	2156	2549	4237	3517	4585	7287	5946	2633	2145	5482	6852	3872	3432	1525	5541	2964	3010	2965	2334	3094	4242
ENSG00000105675	495	ATP4A	2	1	1	0	1	7	4	0	5	5	14	9	5	0	1	11	0	0	1	0	2	0	11	9	0	0	0	0	5	50	0	0	1	0	19	1	21	0	2	1	0	15	0	0	0	1	2
ENSG00000186009	496	ATP4B	0	0	0	0	0	2	0	0	0	0	0	0	0	1	0	0	0	0	0	1	0	0	0	0	0	1	0	0	0	0	0	0	1	0	0	0	0	0	0	0	0	0	0	0	0	0	0
ENSG00000152234	498	ATP5F1A	24366	27092	67623	52332	65442	24449	30300	29533	34451	33512	34368	32334	10598	46949	31686	17610	11744	12321	23298	33032	28203	24222	60003	40116	30769	16573	34836	24454	30009	25884	39551	42840	46117	14295	25687	11370	16990	53736	46125	28312	25590	18654	206908	137786	152020	113977	34949
ENSG00000110955	506	ATP5F1B	31431	24290	55193	79398	61356	30428	28603	41128	29604	29596	32141	27056	30432	50776	47164	29848	23470	25169	39473	37880	44913	41524	48295	48857	42079	23482	47741	28993	32200	33263	26657	31850	37359	30517	24557	22810	43093	71729	51179	34608	68439	23701	48371	33242	34538	21517	42778
ENSG00000165629	509	ATP5F1C	11708	12849	16253	16632	18646	7276	11987	14845	12336	12385	10229	10402	12945	13141	12878	18137	9097	13629	18366	19481	30099	16571	19835	17253	14681	8187	14116	12964	14199	13544	9586	12634	12569	7338	11537	5878	14094	14407	11369	11684	13507	9098	13437	10266	9249	7178	10549
ENSG00000099624	513	ATP5F1D	2093	1374	2892	1678	2701	1408	2091	2079	1898	1833	1533	933	1333	2329	1877	2718	1281	2715	4261	1633	1650	1440	1707	1515	2547	1347	2805	1896	1416	1743	1445	2430	1894	1497	930	1072	887	1977	1099	1874	1528	1587	2123	1402	1417	993	1420
ENSG00000124172	514	ATP5F1E	19180	17454	12836	8979	11351	10085	15505	24786	16424	18958	16118	21819	13330	27254	20855	16367	9441	12343	23579	15201	19743	20710	19333	21420	14675	10236	13502	12672	14868	22959	15145	22911	27946	26185	24220	20493	16867	15710	20419	22611	17333	22181	15563	10562	11923	10341	25103
ENSG00000130770	93974	ATP5IF1	9514	6336	4700	6710	5536	2709	3082	4595	1989	1889	3011	2788	3222	3822	2776	3967	1742	2806	3491	2871	4320	4381	3877	4058	3602	2111	4189	2096	2803	2881	2912	4316	3619	2159	2434	1670	2428	3448	2860	2493	5447	1373	2696	2012	2252	1760	2677
ENSG00000159199	516	ATP5MC1	3217	3024	5954	4881	6168	4124	5868	8264	4687	6294	4354	3897	3789	12575	3642	4904	2611	3235	4982	4944	4553	4515	8351	9080	6807	3611	9181	5111	4560	4774	8267	9057	6471	5478	2544	3786	3038	3474	3352	7180	6299	3891	7074	5133	4896	3108	6220
ENSG00000135390	517	ATP5MC2	7655	6938	7792	14216	8398	7210	6945	5629	9769	8710	5305	5033	11022	10308	7117	5326	5337	3389	4763	5165	10118	7606	7275	7601	11670	8659	8363	10706	3518	5158	6462	4700	5732	9254	6992	6479	12360	8956	9460	5415	7311	10306	9802	7426	8506	8361	8126
ENSG00000154518	518	ATP5MC3	8594	5880	16971	13345	16857	8196	7321	12629	12534	13399	9164	11970	9405	23769	13416	15147	9327	12873	18211	8853	9164	6481	14912	16360	11166	6504	12649	8067	10616	13211	7651	15285	17177	13342	13027	11201	7474	22692	11441	12578	10396	7747	10168	8357	9470	5982	13460
ENSG00000169020	521	ATP5ME	7070	6629	8108	6061	8577	3127	7331	8486	4663	6055	2026	3757	4720	5903	2918	4794	3440	3017	5203	3569	4635	3683	8531	7493	6932	5126	8928	4760	4542	6047	5437	7072	5276	4310	3167	4215	4750	6226	5205	4866	5159	4102	9707	7101	8644	6426	7576
ENSG00000241468	9551	ATP5MF	13642	12107	8905	5830	7677	6504	9718	11778	8836	8507	6440	6532	5418	10862	13575	6458	6007	5000	11407	8058	7821	5692	13836	12437	7776	4242	8578	5955	11377	10762	6696	9460	8458	9811	6114	7982	3919	10701	9373	7276	7312	4738	15383	10765	14480	8655	9488
ENSG00000248919	100526740	ATP5MF-PTCD1	21	18	8	4	7	19	9	28	11	7	6	7	14	11	18	9	16	5	10	7	39	13	16	19	29	8	19	16	16	19	20	20	17	19	9	5	21	12	11	10	24	24	14	10	18	20	6
ENSG00000167283	10632	ATP5MG	5950	4941	4336	3606	4689	3903	6647	5718	3906	3969	3539	4356	2974	6521	3834	3923	3609	3528	4864	4121	5146	4213	5702	6522	4665	3312	6723	2834	4705	4909	3504	6463	7143	5140	5007	4311	4208	4293	3884	4876	6505	4095	6794	4872	5375	4122	6410
ENSG00000249222	267020	ATP5MGL	11	4	5	5	6	3	18	12	6	9	2	8	5	14	5	12	12	8	9	4	8	11	10	7	3	7	12	8	6	9	7	6	11	1	4	8	2	11	3	6	8	6	7	3	10	12	12
ENSG00000156411	9556	ATP5MJ	6978	5951	6294	6990	6138	2463	5959	3867	6176	5876	3142	3221	3824	5560	3438	4256	2878	3522	5564	4343	5975	5122	6755	7166	8699	4651	9195	6394	5433	5520	4801	5556	5010	2796	3971	2324	6405	8963	6509	4111	3959	5481	12768	8464	10742	7883	5205
ENSG00000173915	84833	ATP5MK	6122	5786	7400	6449	7826	4184	4448	8731	5083	5974	4396	4849	6573	7021	6188	5970	7104	4183	7598	5720	7425	6923	14833	11487	7477	4969	8441	6832	6972	7915	5872	7344	7071	7122	6325	7449	7918	6156	5327	7791	8637	4144	9730	6901	7938	5805	5614
ENSG00000116459	515	ATP5PB	23403	18789	10727	11046	12060	14813	10570	17021	13074	13185	12330	14920	10946	26483	16500	15385	10224	13473	22457	11010	11615	8999	20518	18267	16063	11690	17549	17573	15271	16081	10719	23195	21202	13604	12273	11400	11607	16491	12981	17682	24862	16700	10092	8249	7389	5965	18499
ENSG00000167863	10476	ATP5PD	3558	4945	6710	5907	7179	3540	5470	10509	6376	8209	4599	5078	5263	9768	5045	6499	6617	6552	9873	5913	6798	5430	8904	9082	9624	5768	9976	7515	3465	3454	7934	8357	8271	5861	5529	4834	3546	6366	5501	6488	11256	4295	10637	7957	7951	6283	5394
ENSG00000154723	522	ATP5PF	1958	1518	2406	2059	2414	1041	1664	2734	1353	1255	1465	1846	625	2134	1913	2985	941	1270	2294	1615	2012	1609	3430	3606	1733	1157	1552	1304	1921	2266	1365	909	1415	2147	1711	2172	2142	2864	2303	2939	1704	736	3590	2261	2648	1862	1423
ENSG00000241837	539	ATP5PO	3659	2911	4089	3751	4718	2009	1862	4772	2362	2192	2552	2792	2388	3692	2443	4764	1715	2024	3116	2816	4082	3238	4068	4950	3735	2017	2519	2785	2169	2819	2477	2563	4617	3287	2624	2910	3994	3681	2584	4911	3252	1346	4411	3150	2978	2532	3157
ENSG00000071553	537	ATP6AP1	5945	5497	4166	3934	4500	5982	6494	4979	6064	6198	6245	8084	6941	5655	5426	7297	4009	4958	6676	5576	8376	8416	3970	4436	7310	4543	6993	5347	4409	3979	6552	11189	7905	10701	15829	10303	8338	6105	7341	7319	6401	3630	6738	4565	5847	6318	6531
ENSG00000182220	10159	ATP6AP2	6818	6952	4903	4614	5290	7842	7116	6181	5956	5768	11118	14585	5645	8556	6871	3396	3569	4222	6325	5086	6159	5652	8431	8877	6770	4669	8682	5053	6784	6513	6813	16343	9221	16369	23680	15023	10465	10603	13831	10194	7689	5303	8625	6451	6701	7218	7787
ENSG00000033627	535	ATP6V0A1	1662	2335	1470	1493	1545	1919	2871	2785	1937	2596	2387	2576	2131	1984	1509	1375	1676	3358	2846	1794	2912	1880	2366	2368	2383	1909	3168	1925	1379	2322	2729	2284	2821	2661	3424	3522	1470	2198	2820	3665	3303	1625	2129	924	985	1173	2601
ENSG00000185344	23545	ATP6V0A2	5428	4375	2343	1993	2110	3089	3265	2330	2647	3236	2344	2358	2876	2732	2911	2128	3414	2974	5325	2633	2619	2011	3969	3008	1975	1395	3046	2602	5222	4328	2625	4799	4013	3783	4176	4273	4429	6146	6673	3083	4441	2540	5895	4691	3509	2520	3675
ENSG00000105929	50617	ATP6V0A4	138	243	0	0	0	7	34	7	4	7	10	16	13	50	12	5	4	12	10	20	52	4	93	243	6	1	5	0	16	3	1912	0	17	165	41	398	6	2	16	209	42	8	0	0	0	4	200
ENSG00000117410	533	ATP6V0B	11724	9965	7444	3770	5877	5061	7554	7808	3018	3078	4546	4002	3503	5585	4850	4696	8143	9948	16668	8547	12695	13004	7502	5623	4135	3868	8831	5337	9016	10623	6273	6455	7096	9212	9746	7951	5413	6669	6211	8273	9416	5788	4622	4183	3636	2657	5804
ENSG00000185883	527	ATP6V0C	339	245	275	168	238	252	291	224	184	176	149	142	226	165	212	153	222	465	430	202	330	179	224	236	236	164	317	152	327	419	259	213	433	393	342	382	185	417	385	269	293	196	208	258	161	157	297
ENSG00000159720	9114	ATP6V0D1	5970	5175	4691	2052	4004	5465	3826	3794	2276	2644	3742	8730	2768	4657	4314	4015	2150	4766	6382	3791	3837	2191	3796	4022	1912	1116	3448	1148	7390	4429	2239	5236	6818	5228	6824	5578	4570	9584	11064	8519	3785	1886	2451	3708	1992	1807	6632
ENSG00000147614	245972	ATP6V0D2	1	6	0	3	0	5	0	0	0	0	1	0	0	1	1	0	15	41	7	1	1	13	3	3	0	1	2	0	0	0	0	0	1	0	7	1	4	1	0	2	2	0	0	0	0	6	4
ENSG00000113732	8992	ATP6V0E1	5183	4529	7337	5797	6791	6321	4240	4788	7089	6530	3259	6350	6284	7683	4514	4887	6864	9522	14201	6856	9423	7818	6524	5833	5990	3625	4622	3766	6157	5696	3818	5393	7079	10340	10773	9913	3919	12984	10584	8759	5936	4499	6725	4792	5411	4848	5931
ENSG00000171130	155066	ATP6V0E2	1476	4027	1159	252	795	3625	3565	1677	1482	1741	1694	1065	1452	1393	5034	1749	1090	1160	2707	4786	2881	2639	4344	2529	2735	1295	2715	1422	3975	3046	1759	5992	5273	8102	6909	5100	1803	3116	5230	3015	1587	1281	7005	4561	7139	4894	3257
ENSG00000114573	523	ATP6V1A	5970	5307	9969	9733	11937	8915	12421	10271	7364	6864	10149	10684	8734	14046	10323	12526	8338	10524	16156	11062	9920	8216	13197	11347	9868	5772	10527	7161	10647	13026	4915	11518	11440	14622	15814	14582	12879	13005	14704	14830	10991	8909	13806	9951	10805	8716	10663
ENSG00000116039	525	ATP6V1B1	0	0	2	0	3	0	1	0	2	2	6	8	1	1	0	1	4	0	8	0	0	0	0	3	1	1	0	0	0	0	0	3	14	0	0	0	0	0	0	0	0	0	0	0	0	1	1
ENSG00000147416	526	ATP6V1B2	1381	1312	5602	4631	5557	1592	4164	1308	5402	4778	1815	3606	2411	4523	937	1527	1273	1896	2509	1490	1640	1690	2798	2471	2569	2039	3015	2410	3435	3603	1350	2692	3443	1853	2198	1835	2152	3033	5788	1697	1948	3728	3243	2726	2465	2070	2003
ENSG00000155097	528	ATP6V1C1	5721	6449	3015	2160	2639	5251	4222	6755	3411	3305	3680	5223	3390	6580	4369	4967	3708	5305	5609	15025	15713	16442	3632	4221	7807	4591	6419	5082	7362	5572	4411	4810	6636	4135	6343	4044	9282	3055	3980	7929	3310	2249	3923	3578	2813	2641	11304
ENSG00000143882	245973	ATP6V1C2	166	97	5	45	17	20	133	7	51	40	143	383	155	26	205	228	733	614	217	42	80	50	37	641	436	99	246	173	25	41	101	22	50	94	226	93	31	15	127	267	122	743	172	69	101	133	61
ENSG00000100554	51382	ATP6V1D	4816	4311	3775	3427	3685	2110	2517	1822	2111	2043	1916	2992	1790	2660	1928	2314	1685	2765	3081	2143	2283	2671	3498	3169	2707	1820	3599	1812	4419	2907	1645	2815	2616	2657	5688	2521	2585	4950	6112	2720	2582	1821	2900	2681	2506	1911	2651
ENSG00000131100	529	ATP6V1E1	7616	8035	6311	6148	7682	3566	5098	6272	4296	4119	4516	4274	3682	7097	4066	4059	6375	7243	6205	4382	8424	7826	5964	5017	5850	5056	7213	4486	5619	5785	3950	5529	6448	7238	9428	5910	4767	6079	6357	5969	6686	3122	3521	3304	3220	2762	5682
ENSG00000250565	90423	ATP6V1E2	288	441	248	184	173	387	422	414	287	345	469	639	463	436	363	533	257	789	708	457	476	327	238	523	569	381	908	314	284	504	299	644	485	528	598	434	292	118	131	625	166	355	375	380	425	440	489
ENSG00000128524	9296	ATP6V1F	3987	4091	2546	1776	2124	3813	4448	3451	4520	4352	2643	2109	2527	4198	4654	3162	3979	3240	5486	3381	3834	3800	4226	3444	3953	2320	4445	3317	4833	4475	4196	3762	3454	6756	7135	5171	3026	4260	4667	3223	2899	784	4648	3448	4763	4126	2610
ENSG00000136888	9550	ATP6V1G1	10721	10608	4728	5153	5299	6288	6479	2591	4850	4737	3806	4171	4958	7386	6832	9894	5907	4692	8730	3477	4988	4750	5728	5287	7483	4955	5295	5864	7930	7474	6615	7011	6231	7238	9937	6366	7518	5200	7178	6074	6258	4471	7306	6251	6178	5968	6035
ENSG00000213760	534	ATP6V1G2	0	0	0	0	0	1	4	2	0	0	1	1	0	0	1	1	0	0	2	3	4	0	4	5	0	0	1	0	2	1	0	3	2	1	3	0	4	0	1	0	0	5	0	4	1	0	0
ENSG00000254870	NA	ATP6V1G2-DDX39B	0	0	0	0	0	0	0	0	0	0	0	0	0	0	0	0	0	0	0	0	0	0	0	0	0	0	0	0	0	0	0	0	2	0	1	0	0	0	1	0	0	0	0	0	0	0	0
ENSG00000151418	127124	ATP6V1G3	0	0	0	0	0	0	0	0	0	0	0	0	0	0	0	0	0	0	0	0	0	0	0	0	0	0	0	0	0	0	0	0	0	0	0	0	0	0	0	0	0	0	0	0	0	0	0
ENSG00000047249	51606	ATP6V1H	6486	6743	2524	2935	3307	4669	3394	4912	2755	2835	3173	3237	1918	4030	3206	5251	2144	2699	3292	1963	2563	2132	4031	4261	7451	3925	5095	4532	4987	6745	3794	3555	4946	3070	4720	2815	11761	3268	4185	5506	4638	1810	2884	2255	2291	2016	7786
ENSG00000165240	538	ATP7A	1685	1815	1691	2231	2328	1249	1724	1838	1437	1508	1247	2836	2503	2546	1194	1127	1349	2219	2728	1233	2343	1402	940	978	1658	1442	2970	1325	779	670	1315	2333	1749	2097	4040	2047	756	4086	5346	1590	3934	915	1955	1374	1366	1650	2945
ENSG00000123191	540	ATP7B	3825	2158	2742	2949	3389	2362	2263	2107	3713	3536	2789	3272	1837	2314	1725	2071	1215	1258	1757	3819	4503	2690	2773	3828	2142	2009	1521	1681	3888	4372	4804	3224	4612	4055	5053	5980	6091	1278	2044	8854	6348	1951	2821	1362	2046	2361	2075
ENSG00000124406	10396	ATP8A1	314	1436	2690	6073	5119	979	694	953	2840	3026	1460	4600	556	1318	669	1717	1923	1331	911	870	936	626	4666	2019	1429	961	1187	1861	895	890	1430	1086	1576	657	911	890	871	4222	4507	1127	3833	1587	2553	759	2231	2393	858
ENSG00000132932	51761	ATP8A2	1	3	0	2	0	1	4	1	0	2	0	0	0	2	0	1	10	5	24	2	0	0	0	1	1	0	3	0	1	0	0	0	0	0	0	1	4	6	1	2	2	6	0	3	0	1	1
ENSG00000081923	5205	ATP8B1	15652	13804	37296	46594	41095	8273	4619	15270	15714	15973	8693	13901	6826	11577	9204	4771	4563	5299	9217	8153	12224	10574	13987	11308	15937	15497	14045	11321	6700	6360	13980	15975	12974	3859	7224	4162	5313	18268	18144	724	14628	7588	8579	4981	5879	6126	23075
ENSG00000143515	57198	ATP8B2	6	0	5	16	5	6	11	47	3	0	12	9	20	107	5	31	13	8	17	70	22	18	32	19	5	0	9	6	9	17	3	30	18	71	72	38	424	60	95	13	23	6	38	38	61	33	15
ENSG00000130270	148229	ATP8B3	10	27	5	7	1	25	1	2	18	7	16	70	33	10	2	31	130	38	90	56	38	48	38	22	47	21	6	17	16	19	0	6	7	11	14	8	8	95	66	103	37	4	17	122	19	45	3
ENSG00000104043	79895	ATP8B4	136	130	14	67	30	62	20	105	78	71	49	97	24	43	39	48	19	20	31	24	58	26	18	19	37	22	69	28	62	75	48	81	98	21	58	11	57	34	38	88	171	28	64	28	15	18	106
ENSG00000054793	10079	ATP9A	10997	9828	3692	4273	3350	13704	7893	5814	3460	5315	9802	15746	9699	5831	12148	7093	7078	8074	8700	7585	14513	14826	7284	5927	8136	8323	4926	8852	24319	11059	7998	7227	9198	14902	16236	12865	4242	6518	14043	21860	10987	16501	14865	8170	9066	11059	6374
ENSG00000166377	374868	ATP9B	823	2299	4680	5486	5176	1261	1057	743	985	962	1240	1398	534	1141	1055	635	371	479	616	1204	1450	1221	810	732	686	607	1188	738	1117	953	1951	1488	1222	1038	2349	879	764	1930	2336	1045	787	581	1398	1030	941	800	1965
ENSG00000123472	64756	ATPAF1	3728	4706	2402	3270	2821	4310	5606	3031	3233	3466	3150	5103	3570	3326	2142	3011	3963	3494	4891	3042	3269	2343	4440	4635	5756	5572	8850	4341	3065	2738	3211	3952	3847	4568	3531	3355	2021	2880	3502	3414	6723	3681	4184	3033	3554	3495	3716
ENSG00000171953	91647	ATPAF2	1131	935	1485	1406	1611	870	784	786	1273	1229	1209	1115	469	1560	652	884	881	1190	939	1014	1029	1412	877	859	1378	624	1465	967	905	765	836	1045	1721	763	908	592	950	1414	1556	723	1794	695	940	739	848	715	974
ENSG00000150756	134145	ATPSCKMT	881	1293	1201	584	970	656	958	1134	1099	1330	2042	3389	841	987	2076	1373	600	1349	1368	1638	912	672	1862	1420	865	421	1308	891	1480	1645	983	2060	2200	1262	957	1087	765	1907	1272	1266	798	988	2217	1407	1357	745	2403
ENSG00000175054	545	ATR	3084	3211	5164	2895	4816	6542	6011	6841	3302	3425	7691	9202	7427	7304	5849	4962	8730	6989	10530	6250	6573	5573	8118	7738	4562	3308	6739	5215	5862	5820	3594	8024	6797	8643	6367	7452	5818	6227	7330	7721	9306	5043	9511	6946	6637	5262	7470
ENSG00000138085	51374	ATRAID	6836	6422	6689	4189	5332	6586	6626	4879	7865	8278	7759	8600	5915	8138	5548	4990	5502	7476	8410	5737	8878	6008	4437	6479	6383	4937	7143	5398	5252	6406	6508	6732	8447	6151	7607	4441	5185	5265	5871	4878	4688	5637	9382	8270	8308	9735	6353
ENSG00000164053	84126	ATRIP	323	311	534	446	346	590	1114	706	800	979	808	848	705	762	774	624	538	617	777	524	449	420	1959	1488	603	337	838	630	953	476	498	968	861	695	622	555	430	1044	833	775	470	712	1005	832	926	636	718
ENSG00000088812	8455	ATRN	1602	2492	1185	1061	949	3044	3977	1811	6744	7716	3089	4042	2374	5428	6409	3646	3335	3760	5036	3509	4175	4879	4880	4256	3862	3155	3263	4066	846	1124	5046	2719	1736	4809	4576	3844	2736	1126	1663	2230	2190	1453	4679	2449	3060	3274	2784
ENSG00000107518	26033	ATRNL1	2	11	0	0	0	1	0	0	1	4	9	4	2	1	1	1	0	0	5	4	1	4	0	6	1	0	3	3	5	3	1	1	2	4	3	3	0	2	3	1	16	0	16	4	20	21	14
ENSG00000085224	546	ATRX	3356	4532	2605	3551	2786	5134	6777	4381	5181	5276	4970	7364	9304	5323	6877	6704	2189	2765	2782	5052	6112	4934	4117	4509	5436	4693	5136	4562	2965	3353	4445	8065	4096	8623	10009	7346	7094	6594	10954	5610	7298	4661	8263	5406	5349	6145	5607
ENSG00000124788	6310	ATXN1	2863	3448	1716	2252	1733	1514	2104	4059	1006	1325	1696	2251	2123	550	1231	1825	2584	4753	2345	743	1654	1598	2707	1490	1502	2137	2380	3183	1077	1326	2033	2037	1927	2448	4140	2914	1251	868	1994	2365	4489	3692	970	1150	696	1475	1161
ENSG00000130638	25814	ATXN10	2757	3642	5447	5068	6037	2884	4702	4131	5536	5121	3727	2576	2829	6036	3380	3523	5406	4688	5777	3669	3944	2830	5821	5189	3218	3582	5613	4301	4364	5927	3384	4192	4136	5085	5462	3758	3774	5324	4802	2730	2251	3117	4408	3340	3562	2830	6030
ENSG00000224470	342371	ATXN1L	2531	2205	1596	1569	1618	1901	1593	1429	1576	1797	1207	2054	2429	2217	944	1158	2234	1813	1972	1088	2165	1246	1376	1815	1745	1514	1844	1573	1898	1666	1401	2107	1989	1957	1610	1985	1611	2590	3246	1536	2076	2157	1489	2344	1127	1447	2154
ENSG00000204842	6311	ATXN2	687	695	730	1650	811	711	656	948	1234	1223	648	589	1062	1301	1106	887	1524	1403	1275	1020	1639	1586	1518	1178	1107	1419	1275	1000	879	1186	771	1469	1450	824	974	920	1097	1489	1614	878	2820	1400	1718	968	1168	975	1406
ENSG00000168488	11273	ATXN2L	1770	2141	958	1388	970	1290	1701	1419	1336	1508	1379	1162	1818	1650	953	1332	2054	3040	1377	1722	3143	2234	1898	2351	2098	1493	2162	1525	1347	1340	1476	2026	2721	962	1885	1204	2064	1853	2002	873	2994	1362	1384	1445	1041	1750	1845
ENSG00000066427	4287	ATXN3	1642	1804	1109	1058	1043	970	1343	541	1120	905	1247	1255	1003	915	865	1118	1144	937	1153	692	856	785	1463	1532	1434	1206	1566	1466	1360	1338	756	972	1267	1220	2299	1032	2293	1294	1748	893	892	1680	2009	1489	1647	2163	1525
ENSG00000123594	92552	ATXN3L	0	0	0	0	0	0	0	0	0	0	0	0	0	0	0	0	0	0	0	0	0	0	0	0	0	0	0	0	0	0	0	0	0	0	0	0	0	0	0	0	0	0	0	0	0	0	0
ENSG00000163635	6314	ATXN7	736	772	733	1115	860	688	972	1042	1021	966	840	984	1199	779	1113	1022	2097	2082	2242	634	1127	888	1134	1154	846	717	713	598	829	819	691	1259	1104	1122	1598	1353	784	765	1065	1032	1711	935	820	639	703	707	1176
ENSG00000146776	222255	ATXN7L1	392	457	196	140	162	187	293	288	343	328	180	260	205	285	449	219	374	402	439	281	315	250	348	193	286	294	328	284	323	375	238	331	366	287	198	495	145	408	577	244	387	287	333	250	303	300	402
ENSG00000162650	127002	ATXN7L2	468	395	173	68	108	352	298	311	316	366	281	241	239	358	485	356	330	301	759	222	302	571	483	318	328	162	290	498	419	402	503	416	434	306	207	253	327	166	282	336	344	590	249	210	167	219	472
ENSG00000087152	56970	ATXN7L3	3149	4007	3416	2469	3335	3853	4271	4685	5304	6655	2829	3663	5132	5899	2358	2594	6685	6090	7241	3785	5911	4965	5231	5358	5077	3866	6641	5012	2851	3425	5375	4912	5342	3768	4755	3059	4540	3164	3520	4258	5036	4473	5142	5243	4400	4540	4215
ENSG00000253719	552889	ATXN7L3B	9032	9041	4477	4839	4717	9706	5365	6061	8233	8317	5187	7901	8707	14220	6813	7612	5416	5143	8064	7711	10298	6990	7128	8571	9994	4875	9753	9778	7851	9420	6427	5365	9270	7674	10670	5924	13123	9117	11773	7778	5433	8338	9892	8810	7539	7132	12919
ENSG00000148090	549	AUH	2265	2086	779	1173	732	980	739	821	866	725	853	875	887	1100	1103	1232	836	689	945	554	792	689	710	899	1245	973	984	703	887	741	883	1207	1104	662	686	629	895	546	721	859	1526	849	674	408	445	473	953
ENSG00000127423	79000	AUNIP	452	322	822	413	502	814	600	896	572	640	665	429	450	949	410	517	752	1020	1180	671	519	416	1429	1266	413	161	619	333	862	1153	370	962	516	435	296	430	586	958	804	541	217	310	1016	834	864	664	552
ENSG00000115307	550	AUP1	6958	5804	12457	5779	8328	3424	4844	7807	5685	6832	7013	7486	3693	11618	5500	7150	5511	10913	11121	7311	10157	10434	8276	12538	8575	5083	7291	6427	7573	8652	5778	9803	8383	6706	7724	6745	6026	7222	5031	11194	4177	3336	9260	10460	7188	5477	8566
ENSG00000087586	6790	AURKA	3473	2014	7683	4626	5115	2039	4914	9076	6274	7749	4201	5278	4456	15222	4761	5523	3772	3830	9482	6435	7949	14727	12741	13044	8098	3829	7971	4854	6878	8298	3786	12891	9484	2029	1522	2195	3710	6946	4182	4887	5707	3488	7874	4931	7379	5642	8352
ENSG00000175756	54998	AURKAIP1	3508	2557	3903	1919	3120	1814	2359	2968	1642	1687	1778	1633	1628	3300	2595	3232	1745	4056	3918	2174	2042	2251	4252	2976	2065	1599	3936	2052	3237	3034	1721	3228	2235	2447	2499	2169	1345	3385	2481	2743	3060	1012	2460	2315	1872	1333	3003
ENSG00000178999	9212	AURKB	1478	477	3242	2002	1918	424	2386	1991	1858	2416	2270	1692	2021	3586	2135	2313	1776	1774	2508	3126	2574	5345	4172	3462	2241	983	2515	1830	3596	2126	1052	3240	2572	272	250	358	1675	3148	1902	509	1423	877	2694	2396	2413	1677	2091
ENSG00000105146	6795	AURKC	54	26	3	10	14	11	17	0	13	7	0	0	8	15	3	9	41	1	5	11	10	6	34	34	6	12	3	13	0	0	0	14	8	16	22	20	15	13	8	10	12	7	0	0	0	0	17
ENSG00000158321	26053	AUTS2	1571	1524	674	1021	603	493	1761	1077	2458	2392	985	1032	1056	613	1814	841	556	1069	552	284	274	193	1418	1130	1375	3212	1283	868	932	983	465	1176	1047	651	389	615	158	1246	1307	728	1279	2105	1936	1267	1271	1173	1351
ENSG00000169857	57099	AVEN	895	1163	891	437	527	651	1898	736	1529	1485	784	1127	632	904	1260	1078	324	496	943	1072	849	565	1531	1046	329	275	562	408	1580	987	437	703	282	2232	3525	1956	1110	1244	1146	1435	290	546	1984	2248	1672	1266	1470
ENSG00000135407	10677	AVIL	36	43	37	127	69	30	484	37	47	69	24	34	114	20	38	35	32	51	32	26	36	22	27	28	67	106	27	32	17	37	29	30	25	41	82	45	35	129	203	48	85	73	38	20	24	36	85
ENSG00000105778	23080	AVL9	11301	12159	10603	10475	10337	13507	13422	17573	15867	15099	12056	13040	13452	13368	11388	9730	12691	10703	14476	12773	19919	25373	12562	9085	13804	12043	12188	11196	14020	25714	9998	15897	16683	13754	8277	11940	7273	12419	14171	13628	15165	4438	13105	9416	11470	11484	12894
ENSG00000101200	551	AVP	0	0	0	0	0	0	0	0	0	0	0	0	1	2	0	0	0	0	0	0	0	0	0	0	0	0	0	0	0	0	0	0	0	0	0	0	0	0	0	0	0	0	0	0	0	0	0
ENSG00000119986	60370	AVPI1	1371	1560	1512	2036	2625	761	725	1507	1763	1655	570	760	1507	1431	781	891	973	676	892	599	819	973	2105	1543	1121	1097	938	920	839	907	872	820	927	782	873	1071	1639	1187	1066	1350	933	732	879	700	769	827	509
ENSG00000166148	552	AVPR1A	0	0	0	0	0	0	0	0	0	0	0	0	0	0	0	0	0	0	0	0	0	0	0	0	0	0	0	0	0	0	1	0	0	0	0	0	0	0	0	0	0	0	0	0	0	0	0
ENSG00000198049	553	AVPR1B	0	0	0	1	3	0	1	0	0	0	0	0	0	5	3	0	3	3	0	1	5	0	1	0	14	0	0	0	0	0	0	0	0	0	0	1	0	1	7	4	0	4	0	1	0	0	0
ENSG00000126895	554	AVPR2	0	0	3	0	1	1	1	8	11	7	0	0	0	12	0	0	2	1	0	0	3	0	2	0	30	38	16	31	0	1	0	4	3	137	52	158	0	0	0	3	1	2	29	15	94	86	0
ENSG00000204195	158833	AWAT1	0	0	0	0	1	0	3	0	0	0	0	0	0	0	0	0	0	0	0	0	0	0	0	0	0	0	0	0	0	0	0	1	0	0	0	0	2	0	0	0	0	0	0	0	0	0	0
ENSG00000147160	158835	AWAT2	2	0	0	0	0	0	0	1	1	0	0	0	0	0	0	0	0	0	0	0	0	0	0	0	0	0	0	0	0	0	0	0	0	1	0	0	0	0	0	0	0	0	0	0	0	0	0
ENSG00000162779	126859	AXDND1	38	33	285	829	833	44	7	857	106	46	68	345	29	86	6	99	17	21	27	102	193	51	116	524	8	11	6	16	11	26	8	53	63	49	105	26	15	201	105	143	69	11	24	7	22	14	93
ENSG00000103126	8312	AXIN1	6838	8028	5624	4732	5273	7795	5779	6330	3688	3717	4917	3680	7070	4190	3301	3272	8279	6977	6501	4583	7489	6067	10874	13675	5760	5349	6032	4988	5467	5728	4415	5115	7243	4079	4521	3795	3529	6465	6909	4830	6022	4796	3224	6177	2622	4205	6303
ENSG00000168646	8313	AXIN2	4665	19210	6256	6442	8979	9877	22503	4884	80521	92909	15775	41631	13113	19852	26202	32822	6222	11975	9644	9818	5394	2513	28381	33363	13333	6589	15796	13928	7221	12433	24594	8981	14074	34134	61931	22036	4262	3421	6668	42526	4352	11642	13444	11047	9293	7047	14653
ENSG00000167601	558	AXL	15	120	10	9	12	46	12	55	48	48	95	29	35	58	89	22	108	159	121	47	94	35	96	26	87	65	39	91	48	31	79	63	24	38	47	98	61	73	53	38	21	533	77	190	30	418	9
ENSG00000160862	563	AZGP1	11420	3710	363	1707	341	3772	3202	1521	628	1759	2048	2904	4233	660	2118	868	2524	64	341	2047	8217	5498	1431	2949	1390	522	98	382	2101	2583	3714	2103	4765	3354	1494	3038	1789	2273	2736	3891	16354	2013	956	697	1235	1219	4419
ENSG00000163512	64343	AZI2	2035	2686	1864	2168	1967	1944	2343	1813	1875	1822	1763	1886	1831	1559	1986	1733	1240	1475	1405	1233	1237	1121	2037	2008	2483	1416	2319	1788	1925	2579	1271	2799	2327	3139	3869	2666	2217	1514	2036	2052	1771	1767	1403	1134	1072	1193	1666
ENSG00000155096	51582	AZIN1	32304	26255	12923	12519	11970	15726	10533	21378	15903	15851	10618	11972	15025	18893	12237	16981	18271	14104	17412	39064	65643	65935	24398	24452	45565	33980	37912	35192	26964	21565	24614	16512	17940	10659	18127	9400	36832	12242	13442	18235	14889	11691	18686	16480	14197	14513	39864
ENSG00000142920	113451	AZIN2	110	153	191	656	674	463	39	934	274	234	253	227	292	105	152	561	394	388	400	256	341	403	177	400	779	562	379	394	103	322	156	224	341	179	272	208	406	84	83	490	564	114	43	11	48	80	407
ENSG00000172232	566	AZU1	0	0	0	0	0	0	0	0	1	0	0	1	0	0	0	0	0	0	0	0	2	3	0	0	0	0	1	0	0	1	0	0	1	0	1	0	0	0	0	0	0	0	0	0	0	2	0
ENSG00000166710	567	B2M	21954	27144	33369	44777	35393	14386	47596	12641	13602	12467	16387	18698	23948	9416	19993	40080	17519	15250	21756	2273	5514	2134	34555	22205	17798	11330	8193	7994	17963	17589	29404	20652	10487	18815	17883	31883	11859	24859	26013	29503	22564	12630	43916	33999	32943	54624	12281
ENSG00000169255	8706	B3GALNT1	6	3	0	1	0	111	0	267	0	0	0	0	125	1	8	50	3	378	487	228	130	101	174	129	29	25	15	17	0	0	0	384	191	73	36	7	0	223	333	586	31	153	0	0	0	0	0
ENSG00000162885	148789	B3GALNT2	4754	5710	3335	3368	2980	3901	4961	3764	7237	6414	3012	3435	3427	3937	5283	3264	4887	3761	8586	2628	2395	2044	8571	5371	3616	3948	6185	4972	3130	2353	1677	4572	4250	6117	6550	5438	3111	4863	5479	4278	3621	4611	5381	5202	3372	2974	6432
ENSG00000172318	8708	B3GALT1	4	1	577	1934	1722	5	0	181	3	3	0	0	1	0	1	6	210	5	28	2	0	0	5	3	125	1285	781	5	0	1	2	5	6	2	1	2	1	0	3	4	4	3	8	4	5	2	211
ENSG00000162630	8707	B3GALT2	22	34	21	70	40	8	70	0	20	127	13	37	130	20	109	55	2	7	13	0	0	0	4	1	4	3	1	600	9	14	111	2	1	73	601	30	291	14	16	12	0	30	8	58	0	6	37
ENSG00000235863	8705	B3GALT4	0	0	0	0	0	0	0	0	0	0	1	1	0	0	0	0	0	0	0	0	0	0	0	3	0	0	0	1	0	0	0	0	0	0	1	0	0	0	0	0	0	0	0	0	0	0	0
ENSG00000183778	10317	B3GALT5	839	237	1224	3464	1584	82	32	0	117	155	27	26	117	279	25	12	218	224	292	3	43	16	124	32	48	326	47	5	137	30	56	100	9	88	174	409	76	482	628	264	837	133	173	347	102	159	98
ENSG00000176022	126792	B3GALT6	1497	1801	1203	509	891	1068	1210	1221	868	769	1145	927	653	1316	1250	1899	1328	1725	1763	1311	985	704	1736	1190	924	838	2092	1388	1453	1739	1152	1265	921	943	1154	687	804	982	1132	1016	646	672	1930	1654	1239	1033	2215
ENSG00000214654	100288842	B3GALT9	1651	2447	259	158	230	770	560	247	350	420	515	823	673	916	632	877	430	432	586	293	304	137	502	709	1038	543	765	813	628	470	1332	789	594	430	387	328	459	589	583	536	299	454	928	768	555	559	700
ENSG00000109956	27087	B3GAT1	0	3	0	0	0	6	5	0	0	0	0	0	19	0	1	1	2	0	1	12	15	7	0	2	5	0	0	2	2	0	1	17	14	25	4	2	5	1	10	1	3	0	0	0	0	0	0
ENSG00000112309	135152	B3GAT2	0	0	1	0	0	0	0	2	2	2	0	2	4	2	3	1	0	2	5	16	3	1	2	0	14	0	3	7	0	0	2	2	2	0	0	2	4	1	0	2	0	0	50	20	22	27	8
ENSG00000149541	26229	B3GAT3	739	886	1494	983	1527	1378	1947	1903	1091	1171	1636	1758	927	1954	646	924	1569	3221	2465	1385	1891	1437	1588	1872	1745	1020	2920	1402	977	1333	1695	1994	2899	1251	1355	1128	2011	788	1083	1709	1348	1197	833	859	661	780	1862
ENSG00000187676	145173	B3GLCT	478	421	493	556	500	255	1331	765	392	736	754	947	651	773	1031	546	332	301	625	611	318	445	1099	997	186	65	190	100	1083	808	240	2418	2451	290	556	682	134	761	886	830	444	550	1382	885	824	465	372
ENSG00000170340	10678	B3GNT2	3422	3989	3556	3707	4323	2623	3319	2285	3403	3602	3312	3699	2684	2703	5243	3072	4781	7195	6845	1931	3449	3010	3586	4416	3298	3252	4433	3550	4161	2700	3809	3729	3448	6872	13915	7264	2327	2777	4159	4293	2581	2682	5651	5418	4739	5376	4568
ENSG00000179913	10331	B3GNT3	6031	3800	4580	3744	5265	3031	6888	3709	5489	6192	2570	2247	3870	3718	3382	1199	2381	3706	4165	2470	4215	3852	11457	7514	3904	1947	2907	3704	5397	5860	4544	4043	3291	4297	4538	7205	3643	4241	4971	5870	2171	4543	3358	3178	2739	2710	2880
ENSG00000176383	79369	B3GNT4	15	20	13	6	7	1	20	76	15	9	13	7	13	14	14	18	120	54	165	19	29	32	25	49	54	18	27	38	40	33	7	21	16	1	7	1	6	13	9	12	28	19	41	15	35	29	10
ENSG00000176597	84002	B3GNT5	2816	2492	3925	6837	7879	1877	2649	1667	2237	2357	2054	5032	5123	2161	2222	2406	3283	3121	2905	1692	2785	2094	2506	2101	2785	2245	1985	1867	2898	3836	2409	3702	2172	2060	2795	2119	1916	2108	2938	2059	4316	3134	3499	3675	2672	2944	1467
ENSG00000198488	192134	B3GNT6	10	2	147	520	283	0	0	3	0	0	0	0	3	1	1	17	1	9	0	3	7	11	3	2	12	7	62	11	0	0	0	2	1	0	2	2	6	1	0	1	4	0	4	5	3	2	4
ENSG00000156966	93010	B3GNT7	119	11	3	8	0	82	3	3	39	21	23	178	105	44	7	21	311	139	190	10	68	43	71	92	36	44	22	14	100	14	187	91	293	197	353	339	42	35	107	278	255	200	112	144	91	249	4
ENSG00000177191	374907	B3GNT8	757	562	190	231	318	80	506	94	602	620	34	237	320	348	194	120	149	176	129	14	53	20	397	318	255	194	153	300	319	187	472	73	83	302	347	283	246	93	187	203	244	213	204	131	177	182	331
ENSG00000237172	84752	B3GNT9	149	184	280	219	308	283	141	458	376	394	440	1214	266	468	446	287	595	515	781	234	389	249	149	241	323	299	250	199	500	524	149	448	840	405	457	201	173	185	560	276	584	262	347	388	253	269	175
ENSG00000175711	128966610	B3GNTL1	123	258	419	478	407	211	234	313	398	562	307	239	172	693	188	167	369	519	419	456	440	400	369	256	296	243	545	208	87	86	330	470	388	327	198	301	238	381	250	273	189	147	366	398	455	396	215
ENSG00000135454	2583	B4GALNT1	1	1	5	0	0	6	16	7	1	5	12	6	21	7	4	5	65	27	85	86	40	195	29	4	38	6	80	8	30	33	6	4	10	1	4	4	0	4	4	2	8	2	2	2	0	5	24
ENSG00000167080	124872	B4GALNT2	3	0	1	3	1	0	0	0	111	13	0	0	1	104	0	1139	4	6	3	0	4	0	5	9	45	14	14	4	0	0	1	0	1	1	12	0	0	4	3	1	5	0	2	0	0	0	33
ENSG00000139044	283358	B4GALNT3	3158	4516	1828	2376	1841	1869	1013	690	2305	2097	1550	2493	1193	1427	1723	2097	2119	2288	2346	2131	2442	2050	3990	3344	1621	2256	2086	1060	2518	4239	2837	1310	830	2426	5651	1756	1358	604	495	5975	2721	2511	1065	572	850	844	3430
ENSG00000182272	338707	B4GALNT4	197	537	0	0	0	328	29	12	830	925	1989	4329	96	40	2547	495	0	0	0	1403	2551	3008	25	28	185	32	86	772	446	1673	40	738	1192	1247	670	498	1140	115	74	144	43	1709	1196	995	874	1158	123
ENSG00000086062	2683	B4GALT1	6560	6526	2580	4371	4312	1578	1464	1296	3886	3385	1269	1684	2870	3157	2541	3088	1587	3617	2902	1354	2458	2956	2235	2604	3962	5245	4014	2657	2474	2762	2631	2302	1968	1685	2803	1807	1569	1948	1909	2907	4172	3592	1971	1485	1662	1815	2199
ENSG00000117411	8704	B4GALT2	2732	3213	5104	2494	3881	2438	2656	4474	2766	2753	2926	2447	2106	4470	1649	1999	5330	4837	6475	4934	5332	5326	4098	3679	3006	2797	6005	3582	3092	3341	3737	3576	3107	1711	1722	1117	1573	2664	2190	1944	2489	4357	2179	2167	1991	1671	3058
ENSG00000158850	8703	B4GALT3	3060	3835	2167	1813	2082	3038	2856	2443	3792	3329	2158	1856	2358	3696	1942	2609	5697	2507	6121	3374	4561	4880	6423	4375	4510	4234	5231	5828	2487	2841	3019	4313	4672	3966	3548	3234	1985	1697	1787	2312	2510	2297	4369	3583	4218	4041	3733
ENSG00000121578	8702	B4GALT4	1075	894	1291	2037	1700	828	1544	1946	1863	1790	1715	3082	2408	2758	1303	1346	2157	1615	2062	1826	3847	4167	1480	1929	1911	1342	2074	1070	1576	2023	909	1873	2456	2371	2402	1814	1798	912	1340	1664	2693	1204	1901	1516	1721	2125	1468
ENSG00000158470	9334	B4GALT5	5319	6932	6142	7752	7016	10682	4612	7390	9879	10412	10846	9505	5918	12952	9708	4921	6702	11097	10216	5846	6510	6760	17436	16100	7225	7204	7637	4421	14894	14338	8997	14647	21116	7786	7848	7077	6986	7801	9206	11553	9987	11352	6437	6035	5197	4662	11478
ENSG00000118276	9331	B4GALT6	272	222	419	152	186	189	365	145	29	92	108	131	106	215	269	136	91	148	278	160	126	51	1266	367	149	197	273	130	190	132	677	392	349	334	1118	586	155	517	696	320	373	129	1093	756	768	742	179
ENSG00000027847	11285	B4GALT7	1541	2184	1359	968	1398	1953	1673	1137	1338	1504	1340	1696	1564	1795	953	925	2279	3027	2724	1761	1589	1194	2741	2102	1567	595	1457	1131	1424	1516	1012	1492	3275	1919	1472	1607	957	2824	1874	1757	1790	1862	2929	2109	2420	1929	1328
ENSG00000174684	11041	B4GAT1	1093	917	1129	696	711	1016	1728	2033	1143	1203	2028	1773	1323	2670	1316	1139	1865	2628	3383	2705	2702	2087	1233	1663	2181	1022	3608	1735	1577	1241	1954	2930	3681	1471	1698	988	1877	833	1016	1354	808	1188	2991	1831	2647	2485	1845
ENSG00000108641	27077	B9D1	1135	1715	518	423	550	746	761	561	680	574	3656	2616	346	841	967	776	541	747	480	1020	927	1272	579	1356	737	439	789	779	749	1468	640	804	717	509	486	320	942	759	737	549	562	436	642	594	505	550	783
ENSG00000123810	80776	B9D2	154	133	175	151	155	155	247	114	246	256	102	93	216	163	116	99	146	87	241	91	108	107	203	162	125	46	79	112	103	129	91	174	79	158	146	144	133	185	202	150	96	186	190	170	162	129	181
ENSG00000105393	29086	BABAM1	2853	2707	2820	2058	2645	2085	2581	2126	3035	3133	1830	1974	2572	2869	2014	1875	2234	1983	4394	1599	1798	1993	4075	2823	2450	1369	2592	1969	2235	2452	1967	3136	2315	2372	3106	2375	1568	2798	2729	2425	1574	1853	1912	1614	1552	1356	2321
ENSG00000158019	9577	BABAM2	2779	2424	1550	904	1491	1771	778	1109	1314	1312	1902	2914	1177	1755	831	1272	1018	1941	1782	1200	1262	866	976	1432	913	804	1381	884	965	860	977	1499	2467	2041	2907	1615	1362	1338	1673	1979	1117	879	1032	879	790	681	1668
ENSG00000186318	23621	BACE1	1034	948	94	95	125	469	684	736	587	533	467	332	351	288	836	901	521	528	614	552	545	267	879	1440	1697	1675	1464	1031	853	798	596	1173	1051	197	509	180	1080	572	1004	1192	286	295	600	731	681	723	2813
ENSG00000182240	25825	BACE2	8946	7490	6105	6258	4965	3138	2955	1425	2803	3559	2505	1793	1210	66	1257	2743	35	514	52	3620	7799	5527	6751	5761	448	94	10	63	5558	6583	4223	944	4037	7742	11843	6343	524	4565	9110	6298	376	1876	998	589	792	665	2912
ENSG00000156273	100379661	BACH1	5912	6796	3614	5495	5045	2732	3203	4557	2548	2243	2492	3966	2048	4619	3124	4039	3043	3902	3069	4459	8204	10242	3453	4455	3365	3422	2734	3035	2967	4178	2220	1293	2016	4074	5979	3963	7926	3255	4342	5075	3038	2142	4893	2693	3979	5274	3555
ENSG00000112182	60468	BACH2	16	15	0	3	2	5	4	0	0	0	0	0	2	1	1	1	4	11	7	3	9	3	20	0	3	5	0	0	1	1	36	0	2	1	48	0	1	8	22	13	2	2	52	21	11	37	4
ENSG00000002330	572	BAD	1217	1382	1509	1508	1803	1631	1226	2649	1484	1661	1423	1471	1153	1753	1097	1311	1158	2821	2683	2352	2598	2321	2234	1707	2054	1479	3402	1399	1789	2129	1248	2380	2620	1635	1963	1310	1427	1534	1648	2164	1258	1385	1822	1273	1849	1370	2144
ENSG00000107262	573	BAG1	5186	5622	3778	2853	3638	2002	4536	2237	3095	3250	2236	3011	2118	4365	5763	5074	1223	2386	6364	1624	1353	1740	4432	4095	2857	2095	4056	2680	4477	3372	2758	3824	2114	2528	2454	2815	1774	3190	3737	3587	2462	6112	2941	2971	1659	1051	3345
ENSG00000112208	9532	BAG2	183	174	3158	1864	2042	651	1349	3921	472	147	2712	330	310	924	1822	2037	3473	6717	6932	2908	2504	2906	2932	1176	2042	2027	6892	4758	1274	2330	72	1034	960	1353	3569	1039	1940	321	534	953	916	1341	4503	2016	3086	2274	2612
ENSG00000151929	9531	BAG3	830	648	1569	1218	1568	587	1197	1035	978	1162	729	902	1343	1000	812	883	908	2720	1924	951	1499	1306	2971	2129	1146	1136	1546	1147	1729	1504	767	1167	1167	1158	1083	1207	2146	1216	1272	1289	1430	736	1592	1293	1400	1278	1275
ENSG00000156735	9530	BAG4	402	548	2383	2601	2163	670	2392	4652	2046	2072	2537	2128	1469	5865	2372	3192	3928	3646	4605	795	903	791	1963	1433	1458	1936	2110	2179	1556	3378	839	1299	1551	655	676	524	1171	5997	2644	2528	2578	2557	2433	1882	2040	1790	1828
ENSG00000166170	9529	BAG5	5663	5339	3819	3823	4538	2368	3619	2493	3874	4248	2615	3009	2902	3485	2532	2964	2428	2243	4027	2617	2725	2320	5976	5152	4831	3649	5836	4188	6496	4652	2800	4002	2956	2396	4912	2386	4717	6820	7193	2359	2735	5230	8622	7444	6593	5838	4396
ENSG00000204463	7917	BAG6	5553	4599	6986	5951	6057	4777	6227	8537	6983	7052	6876	7179	6584	9627	5002	4649	11636	11428	12296	7100	10923	11179	10797	12240	5572	3436	9118	8186	5778	5531	3695	9173	12151	7334	9112	6681	8055	5294	6111	5677	8859	5560	3417	2844	3026	3113	7167
ENSG00000266074	57597	BAHCC1	360	298	396	489	346	525	427	3	635	653	205	160	636	593	549	712	988	563	429	395	507	439	886	712	754	519	630	711	282	33	655	45	1184	298	274	392	735	11	126	45	233	460	670	400	483	555	685
ENSG00000140320	22893	BAHD1	1184	1218	1907	1839	1513	883	1240	1828	1634	1468	1476	1339	1619	2203	1673	2371	1442	1582	1741	1766	2724	2182	1524	1688	1807	1242	1427	1095	2044	1998	1295	1468	1301	1139	1261	859	1393	1269	1438	1727	1149	1186	2484	1892	2226	1634	2149
ENSG00000175866	10458	BAIAP2	1181	1668	1134	898	1055	588	1183	699	1385	1462	1042	984	1034	740	623	1127	2374	4719	2760	496	681	492	3732	2286	1186	591	1498	1328	1069	1021	1539	960	1255	1472	1855	2081	973	1047	1425	1932	677	955	1097	1301	1136	1069	1216
ENSG00000006453	55971	BAIAP2L1	11905	10614	4845	6400	5611	4770	2432	4070	6255	5360	2535	2153	4832	2995	2529	1899	6206	5102	4557	4457	9924	10062	5951	5010	6134	6620	4596	3732	4632	4647	4587	3819	5098	3356	2065	3363	1932	5073	6339	3039	5583	4458	4766	3394	5057	5832	3345
ENSG00000128298	80115	BAIAP2L2	5520	4978	1003	1060	706	575	960	381	744	609	343	1149	651	1087	902	1225	395	500	741	1036	2329	1817	806	669	760	536	604	639	1082	1598	1141	602	749	1849	1187	1715	1067	619	523	1398	2920	1049	862	781	859	872	468
ENSG00000007516	8938	BAIAP3	467	493	254	234	419	499	897	265	317	303	303	120	426	152	110	220	1938	905	480	209	705	957	392	213	1256	564	513	1345	98	163	633	198	405	292	397	506	275	177	1096	438	232	418	465	2093	393	1170	582
ENSG00000030110	578	BAK1	2467	2608	7642	3989	6244	2263	2420	3348	1595	1795	1734	2193	1979	2127	2500	3049	2235	3805	4981	1851	2549	2164	3733	3409	1197	938	2972	1753	2113	1564	2058	2150	2906	2776	3360	2645	2204	4237	3405	2801	3830	2029	1674	1745	1488	1984	2520
ENSG00000095739	25805	BAMBI	771	4651	240	556	316	2089	1698	1	13114	13940	1502	8293	110	863	4525	6232	871	1657	2868	725	1272	1122	3075	3012	181	106	179	176	2423	2789	1419	266	722	5584	33253	2859	828	928	1486	8375	563	601	1644	1804	935	1611	1940
ENSG00000175334	8815	BANF1	2440	2050	2620	1207	1964	2644	2591	3641	1756	1804	3465	3040	1848	4304	1962	1785	1553	2476	2727	3080	3622	3813	3263	3871	2622	1606	5117	2186	3970	3268	2655	3905	3548	1868	1531	1514	3862	2657	2393	2344	1602	1831	4288	3812	3668	2792	4758
ENSG00000125888	140836	BANF2	16	2	0	0	1	0	23	0	0	0	4	4	16	0	19	8	0	0	0	5	6	2	1	2	0	0	1	7	2	1	8	5	3	64	8	43	6	0	0	1	2	0	0	0	2	2	0
ENSG00000153064	55024	BANK1	139	57	107	82	102	56	43	69	31	28	17	59	50	10	30	25	3	1	11	50	87	29	95	19	5	28	8	34	19	91	41	36	21	21	21	39	30	40	129	33	64	108	32	21	37	83	127
ENSG00000172530	54971	BANP	1611	1316	1454	1260	1146	1095	1145	1334	1231	1128	966	1270	1409	1389	1067	1203	2225	1492	2160	1276	1678	1660	1549	1517	1269	1225	1382	1517	1169	1541	954	1302	1798	1095	1176	929	1017	1382	1272	951	1548	899	1288	1331	1000	1275	1475
ENSG00000163930	8314	BAP1	2859	4145	2732	2903	2204	5138	5553	5522	4146	4609	5575	6703	4471	4799	4460	4763	3367	4054	3791	3585	3172	3086	6837	5988	3610	2048	4646	3113	6243	6490	3664	8959	6330	6819	6725	6148	4439	4986	5295	7373	4241	4593	3943	3468	3548	2820	6282
ENSG00000138376	580	BARD1	1796	1346	2224	1560	1402	538	1499	1447	2493	2475	1387	1407	1524	1895	1331	1876	2577	1806	2508	1490	1759	1176	2708	2717	2055	1583	2110	1983	3070	3160	1103	2413	2150	790	1730	1012	695	3560	2403	635	574	1580	3696	3367	3291	2649	1748
ENSG00000125492	56751	BARHL1	0	0	0	0	0	0	0	0	0	0	0	0	0	0	0	0	0	0	0	0	0	0	0	0	0	0	0	0	0	0	0	0	0	0	0	0	0	0	0	0	0	0	0	0	0	0	0
ENSG00000143032	343472	BARHL2	0	0	0	0	0	0	0	1	0	0	0	0	0	0	0	0	0	0	0	0	0	0	0	0	0	0	0	0	0	0	0	1	2	0	0	0	0	0	0	0	0	0	0	0	0	0	1
ENSG00000131668	56033	BARX1	5	4	0	0	0	3	0	3	1	2	14	12	5	0	7	0	0	2	0	1	1	0	3	15	26	12	36	90	0	0	0	2	2	1	0	0	0	1	0	0	2	1	0	0	0	0	0
ENSG00000043039	8538	BARX2	298	144	139	152	190	14	16	1	50	46	24	32	51	33	6	30	122	166	172	197	183	47	59	82	83	94	220	7	39	53	80	72	19	83	527	61	36	8	58	28	86	12	595	540	484	361	16
ENSG00000176788	10409	BASP1	0	0	1	4	0	31	2	456	14	15	30	10	19	182	138	13	0	0	0	4	3	7	925	7	4	1	2	3	0	146	0	6	70	47	7	4	0	266	62	2	8	245	0	0	1	2	14
ENSG00000156127	10538	BATF	1189	1783	100	26	56	88	13	0	0	0	80	164	0	0	273	3	4	7	9	33	61	40	1	32	0	0	3	1	1031	189	1	0	0	333	226	352	39	1	3	3	0	2	0	0	1	0	24
ENSG00000168062	116071	BATF2	362	432	294	412	331	305	177	480	329	333	243	452	350	466	160	206	480	524	242	149	319	108	182	213	436	416	603	399	82	128	579	287	316	296	202	255	327	246	244	1099	526	308	169	94	124	193	304
ENSG00000123685	55509	BATF3	1	7	0	1	0	1	3	5	1	5	1	3	7	13	1	0	6	11	9	1	1	2	4	2	7	9	7	31	5	14	1	1	3	0	4	0	6	0	1	0	3	9	13	43	4	39	4
ENSG00000087088	581	BAX	1508	1838	4868	2043	3361	2892	4715	4512	5342	5567	1690	1604	1382	4243	1598	1512	2954	2383	4513	3034	2964	2690	2749	2166	2725	1490	3180	2458	2366	2042	2960	4276	4315	1262	1871	1139	1931	5351	6129	2096	1665	3761	2146	1846	1974	1689	3253
ENSG00000198604	11177	BAZ1A	4985	3730	5184	4351	4575	2746	3706	7641	3368	3594	2883	4377	3544	4164	3031	2910	3384	3204	4765	3154	2899	2492	6278	6726	4265	3992	6958	5709	5757	4239	2466	3868	3922	1891	2630	1666	2962	6273	6625	2375	3012	2898	5047	4855	3238	2823	7029
ENSG00000009954	9031	BAZ1B	11993	11532	11164	6838	6811	7336	12573	13015	10220	10919	7111	8852	9735	9284	14644	6305	12348	9728	16384	5168	4537	4356	16456	12759	7830	7396	12064	8942	14097	11698	7614	11718	9955	8033	5783	6951	4739	14902	13982	7863	9391	6355	20353	16658	16964	12026	11629
ENSG00000076108	11176	BAZ2A	1567	1131	1360	4240	1592	1049	2037	1580	2004	1947	979	927	1787	1717	2409	1158	1666	2548	1659	1547	2696	2693	1814	1715	2021	2654	1593	1443	1521	1606	1270	1370	1735	1412	1621	1661	1555	1756	2458	1749	4619	1525	2881	1406	1870	1923	1772
ENSG00000123636	29994	BAZ2B	4495	3929	3598	4462	3758	2168	2346	1684	3481	4247	1270	3136	3888	2203	2514	2722	3726	3433	2548	1919	3778	2542	3198	2759	2800	2888	2815	2189	2002	2020	2719	2086	3448	2970	6552	3549	3703	4725	6215	2928	4355	3290	3661	3066	2949	3427	2762
ENSG00000105327	27113	BBC3	1450	2441	1217	1158	1404	2144	799	799	3247	2487	1255	1706	1573	591	1030	1352	1284	268	332	429	1109	1564	1032	1246	1258	1212	517	776	618	1335	735	1337	1858	867	1259	572	1282	940	1625	955	1540	1966	229	166	351	945	1985
ENSG00000214413	92482	BBIP1	627	584	851	663	820	277	574	403	681	748	526	409	646	684	410	527	406	704	749	279	401	506	1096	938	801	582	828	764	364	489	704	808	565	827	1191	961	1013	570	794	501	703	414	1245	893	906	793	334
ENSG00000171159	79095	BBLN	4233	6131	2290	1337	2537	7342	3585	1921	2654	2892	5175	4944	3180	1921	3038	3230	4560	2812	3352	2454	4452	3077	2412	3095	3114	2285	3236	3781	3150	2811	4721	2423	3409	7058	5967	6016	3068	3959	5885	8113	3291	3802	4444	3947	3171	3363	3527
ENSG00000119636	80127	BBOF1	71	53	63	138	110	105	118	154	21	17	128	105	115	42	75	104	165	207	100	84	140	128	91	159	167	185	248	111	54	89	28	78	161	112	110	53	73	86	173	60	303	73	111	69	129	105	108
ENSG00000129151	8424	BBOX1	0	0	0	0	0	0	0	0	0	1	0	0	0	0	0	0	0	0	2	0	10	25	0	0	0	0	1	0	4	1	0	5	1	0	0	0	1	0	0	2	0	0	0	6	12	1	1
ENSG00000174483	582	BBS1	131	182	90	90	98	136	161	149	128	180	133	140	135	174	113	194	147	182	144	131	166	145	229	196	239	128	201	224	103	162	137	164	223	127	175	125	121	169	161	192	148	229	177	118	167	191	203
ENSG00000179941	79738	BBS10	605	951	26	34	18	1087	573	413	1221	1081	833	967	1186	1737	837	749	736	573	677	665	1171	784	891	864	965	594	905	1220	712	981	903	863	1292	940	1470	691	662	1027	1210	989	643	1209	1322	1021	920	1057	313
ENSG00000181004	166379	BBS12	350	628	188	246	260	288	180	67	277	323	62	297	239	208	134	197	249	316	365	123	136	70	180	175	172	76	98	141	220	335	176	247	209	174	318	245	272	299	493	194	144	229	220	119	179	305	231
ENSG00000125124	583	BBS2	2503	5337	1496	1653	1603	4710	2343	823	2797	3486	2118	5391	2383	1509	2436	3602	3833	3437	3644	2083	3544	1899	1754	2649	4058	2563	4091	2825	1534	1370	4398	3020	4257	4713	4721	2803	1647	1720	2378	4623	3662	2199	1430	1671	1133	2361	3395
ENSG00000140463	585	BBS4	766	954	698	589	543	324	525	463	863	878	360	499	447	842	264	392	798	701	678	361	666	567	521	461	797	409	912	634	131	185	796	667	635	592	792	435	233	470	725	524	961	600	783	554	513	525	510
ENSG00000163093	129880	BBS5	444	1032	156	62	78	633	264	110	514	708	537	786	285	779	591	429	196	310	299	318	166	170	442	367	347	192	363	327	257	692	508	520	410	151	91	136	288	672	776	456	124	343	345	302	313	250	637
ENSG00000138686	55212	BBS7	1004	1245	1112	968	1169	617	1036	697	698	848	503	989	585	919	738	858	908	942	1283	514	442	456	1130	923	949	570	1306	926	956	1135	642	1192	916	664	947	601	991	1135	1152	723	975	626	1045	678	980	749	922
ENSG00000122507	27241	BBS9	805	1064	287	171	266	719	577	399	687	650	395	856	704	500	419	617	138	282	344	378	289	414	319	309	799	356	330	529	162	552	419	575	598	1181	1395	737	422	307	760	572	415	389	778	467	814	773	606
ENSG00000114439	56987	BBX	2058	3039	2946	3632	2632	3454	3102	2791	2246	1822	4269	3686	5390	2555	4027	3447	2668	3406	2816	3570	5135	4645	3500	3304	4219	3160	3296	2951	2402	3990	2014	4631	3625	5832	7283	4304	3679	3402	3901	3657	2979	3046	6689	4143	5348	6266	2663
ENSG00000187244	4059	BCAM	25	31	55	131	219	101	284	6	2082	1459	314	1143	525	1255	188	230	898	631	253	149	342	411	733	273	585	765	165	1557	29	192	97	43	300	198	467	385	1252	584	1101	538	111	650	565	625	840	2456	130
ENSG00000132692	63827	BCAN	2	1	4	0	12	4	0	0	1	1	0	0	4	1	0	0	1	1	2	2	8	7	9	1	0	0	2	0	0	0	0	0	3	13	5	14	0	2	4	0	6	1	6	3	0	4	0
ENSG00000075790	55973	BCAP29	153	260	126	38	56	124	77	196	141	114	111	75	71	139	122	57	246	203	349	121	126	106	170	171	136	74	162	63	168	148	104	144	207	225	274	192	47	212	230	112	137	79	285	206	228	184	142
ENSG00000185825	10134	BCAP31	19004	18157	11472	8597	11064	13598	11299	13269	11686	13114	13539	15466	21383	19581	12935	12143	6448	8466	12793	14796	22298	18918	14334	16054	19099	13745	16662	12625	14734	12963	24124	28100	16771	30632	24731	26289	18805	21403	21099	17774	12909	9395	16491	11991	13858	10669	18780
ENSG00000050820	9564	BCAR1	6592	4834	6108	3335	5980	3827	3063	2931	4562	4651	3668	5685	4600	5117	3454	2943	7527	8540	7346	3289	6328	4330	6046	4560	2988	2609	3912	1762	6393	4886	2309	5277	7018	4057	4784	4511	3288	6570	5902	8060	5930	3758	2700	5981	2518	3539	5952
ENSG00000137936	8412	BCAR3	2324	2639	1381	2419	2531	1979	544	1238	819	1007	1357	1488	1105	722	983	1078	2973	1839	1117	1067	1859	1595	1110	695	1532	1894	1560	907	1060	1236	1398	876	878	1212	1349	1127	637	1128	1515	1270	1449	1316	785	520	736	884	1162
ENSG00000064787	8537	BCAS1	1794	1262	2209	4565	3892	346	27	1398	3551	3566	21	312	888	944	250	149	81	353	57	279	1520	2714	28	109	689	514	271	128	38	55	412	164	63	297	249	407	121	224	276	2934	498	527	294	179	217	405	250
ENSG00000116752	10286	BCAS2	2883	2664	1204	700	1001	2341	1843	2272	1790	1798	2033	2767	1395	3319	1889	2031	1986	2955	3733	1953	2534	2425	2484	2111	1796	1531	2632	1777	2383	2653	1149	4604	2659	2151	2764	1643	1676	2599	2861	2293	2244	2328	1666	1561	1418	1171	2616
ENSG00000141376	54828	BCAS3	448	1280	435	671	604	817	627	1035	1416	1720	1082	1652	1026	1008	721	759	1056	689	1132	734	1499	1286	579	487	1439	900	1387	938	98	427	787	930	1024	1260	2033	897	956	423	777	1435	1299	979	1324	895	1053	1669	910
ENSG00000124243	55653	BCAS4	117	642	231	203	242	540	69	253	433	565	512	539	426	558	864	283	691	750	685	556	758	1455	502	680	692	193	551	473	314	306	620	1027	744	792	565	475	187	206	415	530	115	320	468	349	459	344	207
ENSG00000060982	586	BCAT1	9	4	7	26	3	0	5	0	1	6	11540	5017	1	0	1	4	87	8622	48	980	270	242	3	6	23	6	12	422	1	0	1	0	2	40	39	13	1	11	4	3	3	0	5	0	2	18	271
ENSG00000105552	587	BCAT2	576	1040	2583	3323	3192	1916	1485	2054	2679	2290	1537	1496	1820	2866	1264	1584	2313	1961	3774	2109	2325	2858	3047	2730	2672	1505	2032	2206	1440	1865	1909	2583	1886	1343	2244	1179	1377	2709	2577	1450	1720	1697	3709	2627	3091	2610	2175
ENSG00000107949	56647	BCCIP	2655	2312	4364	2421	3915	1688	3961	4538	3028	2983	2567	2803	2597	5851	2346	3293	2150	4070	4852	2538	2140	2097	4894	5092	3277	2601	5254	4360	3537	3421	1230	4385	3272	2314	1952	2374	4992	3175	2222	2857	2416	2827	4429	4217	3526	2636	3508
ENSG00000186666	144233	BCDIN3D	836	1021	343	448	353	437	735	438	393	438	519	520	581	566	671	454	254	306	437	325	406	226	668	549	719	491	725	813	307	504	625	453	444	319	326	252	571	428	655	466	278	466	553	436	385	364	917
ENSG00000114200	590	BCHE	13	5	0	0	0	16	20	0	3	7	3	23	21	178	11	6	0	38	8	2	1	1	0	1	1	0	2	10	0	1	0	0	0	3	18	7	13	0	1	85	3	0	845	314	505	544	24
ENSG00000248098	593	BCKDHA	231	332	282	354	373	298	192	271	463	441	129	125	378	230	239	306	264	148	307	161	207	255	333	248	327	158	205	393	158	264	240	285	245	267	253	249	183	202	190	231	257	266	317	193	325	298	216
ENSG00000083123	594	BCKDHB	1336	1264	1908	1918	2114	1852	2065	1667	2067	2043	2694	6336	1143	1897	1080	1632	597	1324	874	1395	1260	761	1404	1655	1686	933	985	909	1260	1397	1435	2831	4633	4790	3679	3564	2078	1347	1811	3103	2751	1333	1181	1098	876	1071	2716
ENSG00000103507	10295	BCKDK	1675	1738	1819	1637	2094	2256	1485	1721	1657	1600	2062	2324	1999	2345	1217	1589	2035	2570	2329	1406	1969	1175	1591	1654	2157	1253	2179	1728	1832	1643	1225	2505	2937	1557	1998	1260	1757	2320	2340	1384	1287	1407	890	1194	825	1061	2248
ENSG00000142867	8915	BCL10	6508	4027	3249	4176	5255	1440	1110	2868	2231	2206	1037	1480	1757	1987	1379	1251	5193	4250	5302	790	1260	1510	2793	2517	1855	3614	2785	1718	1781	1809	1331	1873	1852	1576	2265	1558	1124	2411	2599	1815	4288	2760	1172	982	1071	1391	2434
ENSG00000119866	53335	BCL11A	757	792	367	685	292	812	1330	602	1206	980	1008	654	1051	869	1407	1772	612	517	624	826	891	364	943	1052	1674	1602	1141	1222	823	1057	799	939	1576	980	806	1061	633	741	918	1114	975	1419	1156	624	873	837	2108
ENSG00000127152	64919	BCL11B	1412	1207	960	775	714	327	724	1332	758	1016	749	1290	1284	833	429	524	56	113	124	956	932	417	320	1060	635	313	664	425	858	698	1166	1349	753	321	267	406	1122	578	938	219	1058	725	821	532	498	278	1141
ENSG00000171791	596	BCL2	59	61	398	588	256	8	95	32	4	7	17	4	17	31	29	57	2	2	8	18	12	11	47	17	42	26	17	93	173	204	174	31	3	9	3	6	105	99	108	7	6	273	487	257	330	231	99
ENSG00000140379	597	BCL2A1	2	1	0	20	0	1	0	0	0	0	2	0	1	0	1	1	1	0	0	1	2	0	0	0	1	0	0	0	0	0	0	7	0	0	20	1	4	1	1	0	0	0	0	0	1	0	0
ENSG00000171552	598	BCL2L1	8889	16123	7913	4566	6668	10512	5639	6388	12598	14982	5255	8880	15004	11050	7406	6073	5485	9694	11702	8278	9567	10159	10905	6051	3703	3322	3857	4011	8711	9277	9566	8006	8404	11870	9898	11913	5503	8880	15298	13863	7198	12830	8967	9220	5401	8160	5933
ENSG00000137875	10017	BCL2L10	39	7	7	3	2	17	41	47	18	10	31	47	13	48	47	56	4	2	1	8	11	10	48	45	37	9	43	9	0	0	11	161	29	56	23	42	69	18	25	34	14	21	50	49	55	27	82
ENSG00000153094	10018	BCL2L11	358	272	203	213	158	321	458	401	478	437	447	617	314	309	511	563	870	841	553	272	723	725	619	482	330	388	305	338	755	689	320	398	609	381	915	576	317	337	455	472	724	651	725	430	509	554	566
ENSG00000126453	83596	BCL2L12	236	239	345	195	253	246	427	348	486	528	208	191	203	529	223	243	521	430	921	252	230	228	768	500	357	186	332	403	440	441	190	470	267	208	322	236	270	350	255	299	156	217	630	414	483	386	471
ENSG00000099968	23786	BCL2L13	7433	9743	4370	5637	5462	4232	5016	3910	5868	5260	3465	3426	3024	6087	3740	4302	5467	4980	4541	3816	6157	5756	6164	4469	7112	8752	7126	7062	4357	5410	5171	4485	4842	5257	5727	4425	3470	3733	3930	5267	6708	4836	3537	2828	3419	4000	5997
ENSG00000121380	79370	BCL2L14	7419	4854	1626	6564	2754	2513	1389	709	994	699	552	798	2986	555	928	589	1275	803	569	2257	6074	5868	443	658	5110	4265	1749	3063	1163	1237	2173	652	1103	1859	385	984	1543	1405	1934	913	3336	1001	1429	851	1425	2741	1085
ENSG00000188761	440603	BCL2L15	6075	8024	977	1305	1186	949	59	873	1578	1608	573	3099	1063	523	681	1413	1235	2181	755	1224	3914	2668	1609	2442	1803	2301	2085	490	2331	375	1251	1179	616	1575	3506	1096	192	1228	1806	2538	1801	434	1795	1810	1493	1480	2481
ENSG00000129473	599	BCL2L2	2194	4119	1446	2080	1906	1027	1618	1037	1905	1742	1334	1028	732	1050	1173	1369	1680	2052	1296	1166	1527	1591	1399	1214	2692	1838	2770	1688	1800	1472	2138	1357	1304	1136	1969	953	1633	1566	1721	1006	1071	1160	1834	1526	1340	1614	1572
ENSG00000258643	100529063	BCL2L2-PABPN1	24	25	42	26	40	11	46	25	29	40	26	26	36	38	19	31	24	24	99	16	15	10	98	74	66	41	44	48	34	40	31	34	34	23	32	23	16	49	36	48	36	36	58	32	38	34	45
ENSG00000069399	602	BCL3	329	275	201	365	263	103	165	123	109	115	67	62	162	152	71	192	232	145	269	156	313	221	58	98	195	261	157	135	132	129	117	212	174	95	106	90	98	125	96	64	204	240	155	157	119	184	184
ENSG00000113916	604	BCL6	388	285	526	1026	827	1062	323	813	871	679	713	1369	1097	553	226	466	1022	786	633	546	1767	1147	150	163	626	1267	414	932	219	458	194	553	1130	828	321	472	1307	1010	1684	456	1241	1432	492	521	297	600	1298
ENSG00000161940	255877	BCL6B	58	25	0	1	0	15	16	110	0	8	2	2	37	5	4	8	0	1	0	8	22	25	119	201	12	2	23	7	13	10	1	22	15	7	3	1	17	8	3	3	36	1	6	11	12	7	0
ENSG00000110987	605	BCL7A	814	1014	1184	956	767	1028	1056	917	888	1025	905	872	605	1540	1094	1227	1819	1286	1378	1573	1954	1903	882	768	1476	770	1464	1640	988	1224	1043	1182	1286	143	766	115	2297	810	1384	828	1143	1463	1793	944	1176	931	1690
ENSG00000106635	9275	BCL7B	3708	3403	1891	1203	1644	1345	2130	2340	1509	1568	1145	1151	1356	1603	1480	697	1689	1991	3242	861	905	873	2431	1820	1724	1326	2300	1204	2766	2086	1317	1927	1910	1690	1114	1662	920	2626	2539	1137	1514	1069	2767	2728	2772	2261	1756
ENSG00000099385	9274	BCL7C	2430	2519	1449	877	1331	1931	2169	2149	1608	1816	1728	1691	1822	2096	1235	1007	1777	1674	1855	1965	1836	1213	2175	2608	1855	878	2335	1555	2354	1805	1252	3112	2943	1801	2430	1905	992	2779	2706	1260	682	1636	1707	3525	1731	1765	2245
ENSG00000116128	607	BCL9	340	392	274	394	284	475	865	462	1161	1138	373	536	708	632	610	709	1219	893	787	506	693	583	1642	821	905	669	840	723	465	488	307	537	597	621	321	669	421	430	526	581	445	878	622	299	571	492	666
ENSG00000186174	283149	BCL9L	632	681	850	951	760	355	1271	451	688	691	484	582	632	468	530	502	1010	2435	832	605	1145	996	726	529	703	738	861	318	644	482	931	576	613	471	721	1021	501	784	1062	851	1383	899	1361	1053	831	1121	573
ENSG00000029363	9774	BCLAF1	12311	9762	11141	6980	9077	6032	11818	7962	8684	9371	6246	7932	6925	13354	8402	8314	6027	10650	15483	4897	4657	4359	15047	15661	7205	2744	6941	4242	12921	10630	4760	13527	9862	6196	9381	7319	6022	10241	11104	8035	6829	8556	9632	6665	6393	4727	13547
ENSG00000173681	256643	BCLAF3	1296	1979	430	670	552	892	1102	705	1009	1204	1282	2051	1445	902	1721	852	731	555	610	674	1440	750	905	1038	1315	1562	1305	972	667	751	1695	1563	1147	1698	3004	1550	1300	945	1838	1497	1348	718	1163	746	860	1150	1271
ENSG00000135697	53630	BCO1	272	282	200	954	396	125	10	58	151	71	52	322	369	143	2	354	231	117	125	257	721	315	16	45	193	244	77	25	58	50	39	70	64	69	30	38	45	234	180	126	427	25	95	92	177	174	128
ENSG00000197580	83875	BCO2	47	38	39	35	46	66	149	33	15	21	17	18	108	34	10	43	133	69	62	35	110	24	69	76	37	37	25	21	29	28	228	38	48	38	69	66	183	17	25	170	368	47	45	21	49	78	43
ENSG00000183337	54880	BCOR	2218	1955	1325	1442	1077	985	5594	1308	2165	2291	1040	1950	1431	1807	1565	1293	994	910	876	810	1197	1058	1185	1251	1804	1145	1315	1409	1272	806	970	1129	1274	1345	3031	1358	1383	868	1590	1241	1139	1464	1763	1414	1173	1176	1806
ENSG00000085185	63035	BCORL1	36	66	46	73	40	99	296	133	236	195	211	221	277	208	342	187	161	275	119	162	231	174	191	187	204	332	194	222	175	139	148	186	230	176	118	163	179	111	173	199	355	89	259	151	159	150	84
ENSG00000186716	613	BCR	4311	5787	8351	4932	7184	3345	4573	3348	4611	5301	3724	3887	2220	6791	3142	3966	5289	6117	7221	3736	4156	3279	7738	5364	3822	3736	5274	4272	6087	6616	3091	4290	3851	5729	5772	5102	3079	5295	5745	7560	5076	4002	3340	3776	2787	2447	6629
ENSG00000074582	617	BCS1L	1894	2156	2797	1086	1758	1653	1632	1699	1733	1710	1868	1828	1269	3319	1809	2077	2119	2966	3953	1354	1132	1227	2818	2724	1937	1241	2289	2322	1735	1892	1651	2553	1923	1855	1762	1459	1034	3147	1424	1922	863	1171	1720	1650	1482	1068	2568
ENSG00000161267	622	BDH1	899	753	2505	2030	2887	1291	777	1381	868	999	1888	2248	1476	1258	917	876	1494	2121	2345	1155	1164	733	793	1002	1260	1076	1253	892	963	699	690	1324	1527	1418	516	1127	772	1821	1447	1219	1938	702	1096	710	800	829	1252
ENSG00000164039	56898	BDH2	614	702	573	849	1163	1853	943	417	654	708	468	3800	1516	829	358	1021	166	182	192	793	2071	1108	370	487	1729	1060	1135	1938	1304	1720	508	273	1001	610	803	444	2910	734	1997	1767	2011	1243	657	535	653	919	1036
ENSG00000100739	623	BDKRB1	251	179	138	207	215	0	5	10	23	6	3	8	11	21	2	37	121	31	28	19	40	18	20	30	28	42	48	5	38	60	45	12	1	2	10	3	12	3	3	39	28	0	15	10	13	33	19
ENSG00000168398	624	BDKRB2	1956	1516	1299	1284	2051	24	53	95	239	86	95	343	194	84	39	432	1456	1058	865	244	283	176	576	866	263	336	525	57	1567	837	299	179	143	74	105	134	88	92	108	574	286	12	381	436	257	331	198
ENSG00000176697	627	BDNF	2	5	0	0	0	0	1	1	262	116	0	2	1	104	77	15	11	292	75	0	1	0	2	0	0	0	7	0	1	0	0	0	0	9	14	1	0	34	16	28	2	19	131	27	35	71	4
ENSG00000145734	55814	BDP1	1076	1990	2270	2438	2033	1407	1599	1722	2059	2118	1558	1543	1211	1587	1458	1520	1882	2127	2244	1755	1530	1322	2732	2353	2176	1352	1647	2244	1815	2210	1379	1811	3313	1561	2121	1444	1638	3368	2327	1578	2473	2259	3844	2369	2687	2070	1499
ENSG00000166546	146227	BEAN1	22	20	2	7	5	61	1	2	0	0	3	1	3	0	0	4	105	15	14	0	2	1	46	5	1	0	0	0	15	40	6	4	55	24	5	87	1	12	31	30	57	1	4	8	5	15	0
ENSG00000126581	8678	BECN1	4158	5043	5112	5582	5999	4508	3603	5675	5976	6739	3665	6008	5839	6555	3588	4506	3429	4590	5003	3630	5416	4243	5172	5857	6743	4675	5378	5162	3279	4206	4404	6211	4970	7753	8503	5745	3921	4442	5207	7415	5621	4636	2730	1821	1496	1628	5085
ENSG00000196289	441925	BECN2	0	0	0	1	0	0	0	0	0	0	0	0	0	1	0	0	0	0	0	0	2	0	7	3	1	0	0	0	0	0	0	0	0	0	0	0	0	0	0	0	0	1	0	1	0	1	0
ENSG00000183092	57596	BEGAIN	38	38	33	26	23	21	3	8	36	13	29	23	28	7	16	48	183	74	67	4	13	0	41	54	87	46	44	59	15	34	10	43	37	9	20	13	17	48	34	12	11	8	236	181	228	198	38
ENSG00000177324	139105	BEND2	0	0	0	0	0	0	0	0	0	0	0	0	0	0	0	0	0	0	0	0	0	1	0	0	0	0	0	0	0	0	0	0	0	0	0	0	0	0	0	2	0	0	0	0	0	0	0
ENSG00000178409	57673	BEND3	1240	876	1902	687	1196	1026	1349	1382	1098	1052	1151	895	941	1617	1138	805	976	992	1461	926	1202	991	1884	1234	1282	715	1523	1110	1504	1482	561	1291	919	611	825	600	1158	1295	1392	673	1038	1195	1405	1072	991	782	2517
ENSG00000188848	389206	BEND4	0	0	0	0	0	0	0	0	0	0	0	0	0	0	0	0	0	1	0	0	0	0	0	0	0	0	0	0	0	0	0	0	0	0	0	0	0	0	0	0	1	1	7	21	0	1	0
ENSG00000162373	79656	BEND5	0	0	0	0	0	0	0	1	0	0	0	0	0	4	0	0	0	0	2	9	11	6	0	0	0	0	0	0	0	0	0	0	0	0	0	0	0	0	0	0	0	0	0	0	1	2	0
ENSG00000151917	221336	BEND6	9	4	1	1	0	9	0	32	0	2	1	1	0	3	0	3	339	147	431	21	10	14	20	2	5	8	17	7	6	29	2	283	27	3	7	1	9	4	3	2	78	0	185	89	181	167	6
ENSG00000165626	222389	BEND7	50	977	276	569	501	458	876	390	508	704	582	584	1225	420	897	1055	1432	1309	1091	1942	2953	1904	60	673	984	636	914	1202	321	278	547	728	886	247	129	204	1268	420	681	643	565	670	1020	619	1068	1161	462
ENSG00000167995	7439	BEST1	494	510	14	35	28	78	10	98	14	10	88	78	121	34	20	28	35	79	86	382	430	329	61	55	99	106	156	27	18	35	24	350	130	63	210	38	72	0	13	41	220	26	19	14	10	85	94
ENSG00000039987	54831	BEST2	0	0	0	0	16	1	1	0	0	0	0	0	0	0	1	0	0	0	0	0	0	3	3	0	0	0	3	2	0	0	3	2	3	0	9	0	0	0	0	1	0	1	0	1	0	0	0
ENSG00000127325	144453	BEST3	6	54	3	0	2	0	162	2	133	265	7	109	2	6	35	24	0	0	0	2	0	0	2	5	4	0	16	0	0	1	1	3	2	7	90	10	1	2	0	38	1	13	32	28	19	24	389
ENSG00000142959	266675	BEST4	39	24	5	36	11	178	132	33	32	28	31	24	21	27	12	6	38	6	16	1	12	5	34	38	30	16	31	60	68	26	24	45	20	46	55	66	113	6	47	38	30	67	54	97	27	86	78
ENSG00000105829	10282	BET1	4077	5084	879	1163	1089	1638	1197	1533	1512	1186	1059	1191	1097	1495	1705	905	1256	914	1593	951	1471	1631	899	1072	1270	1068	1260	1013	1341	1470	1177	1569	1308	2099	1455	1308	847	976	1204	915	2403	828	1241	902	1340	1238	1437
ENSG00000177951	51272	BET1L	2555	2045	1591	1305	2127	1486	1604	2121	1614	1665	1463	1712	1187	2126	2391	1008	1246	1958	1881	1768	2767	2801	1916	2061	1774	1585	1186	1384	2060	1873	1364	1883	2276	1779	1847	1467	1476	1377	1544	2095	2429	772	880	820	740	660	2056
ENSG00000133169	55859	BEX1	0	0	0	0	0	0	0	0	0	0	0	0	0	0	0	0	67	0	117	0	0	0	0	0	0	0	0	0	0	0	0	0	0	1	0	0	0	0	1	0	0	0	0	0	0	0	0
ENSG00000133134	84707	BEX2	5	0	0	0	0	192	170	20	161	149	492	514	635	172	393	582	6	37	31	205	385	634	521	199	98	62	59	148	16	91	0	2925	890	1465	1327	683	507	148	179	748	894	532	0	0	0	0	55
ENSG00000166681	27018	BEX3	0	1	0	25	2	0	3961	2317	2637	2779	4051	4341	6170	3926	3043	4463	2007	1871	3593	2039	1017	2153	3688	1253	1860	1781	993	1926	7	1791	0	6086	2662	4956	6539	1995	1932	7068	10869	1331	829	4106	8902	7365	7031	6591	325
ENSG00000102409	56271	BEX4	0	2	0	1	0	48	0	0	0	1	3	7	1845	2	55	127	0	0	1	101	291	526	578	166	0	0	0	0	0	0	0	3	6	1797	2694	803	11	129	432	151	444	1123	22	12	38	54	0
ENSG00000184515	340542	BEX5	1124	57	45	99	74	41	2	25	0	0	105	136	244	245	67	99	4	2724	598	40	19	40	13	64	113	44	73	90	65	132	0	90	58	120	194	72	135	42	42	8	99	128	1076	285	364	532	61
ENSG00000103429	51283	BFAR	2243	2452	1868	1133	1431	2272	1681	1186	2131	1906	1044	1334	2162	2333	1245	1211	2079	1748	2583	1848	2974	2289	2558	3492	2293	1409	1615	1641	2063	1662	1693	1502	2760	2221	3178	2055	2458	2782	2657	1599	1624	1582	1487	1805	1407	1732	2109
ENSG00000125864	631	BFSP1	2024	1533	58	36	79	514	398	35	136	421	141	110	526	255	287	128	367	162	125	300	607	257	140	93	206	129	85	101	93	95	724	191	111	905	104	1392	870	228	741	156	85	164	264	307	163	370	65
ENSG00000170819	8419	BFSP2	0	1	0	0	0	0	1	0	1	1	0	0	0	1	0	0	0	0	0	0	0	0	0	0	0	0	0	0	3	0	0	0	0	0	0	1	0	0	0	0	0	0	0	0	0	0	0
ENSG00000242252	632	BGLAP	7	1	1	5	2	2	1	8	6	10	5	5	7	6	2	10	11	4	3	3	7	14	10	10	12	17	6	16	0	2	8	6	6	4	6	8	5	4	4	2	7	8	11	4	8	15	6
ENSG00000182492	633	BGN	0	0	0	0	0	3	0	5	5	1	3	6	2	44	4	0	0	1	0	0	0	2	6	6	21	16	1	1567	0	0	0	3	0	1	1	0	12	0	0	2	2	0	0	3	3	103	4
ENSG00000180535	168620	BHLHA15	2725	6811	386	217	410	300	667	449	196	103	233	125	244	569	361	320	496	771	1308	336	357	360	346	256	569	226	460	401	466	502	310	743	599	288	156	104	95	36	63	282	238	126	255	234	312	241	211
ENSG00000205899	727857	BHLHA9	22	13	1	0	0	50	959	3	29	17	3	19	18	149	17	13	1	2	3	10	2	8	126	125	7	26	4	33	0	0	13	60	22	457	656	450	150	2	103	23	14	14	121	283	123	167	0
ENSG00000180828	27319	BHLHE22	0	0	0	0	0	0	0	0	0	0	0	0	0	0	0	0	0	0	0	0	0	0	0	0	0	0	0	0	0	0	0	0	0	0	0	0	0	0	0	1	0	0	0	0	0	0	0
ENSG00000125533	128408	BHLHE23	0	0	0	0	0	0	0	0	0	0	0	0	0	0	0	0	0	0	0	0	0	0	0	0	0	0	0	0	0	0	0	0	0	0	1	0	1	0	0	0	0	0	0	0	0	0	0
ENSG00000134107	8553	BHLHE40	2630	1847	2835	7255	3166	557	1446	2185	2584	2783	1100	815	1408	472	990	1238	2642	1631	735	798	2631	1463	945	1957	2067	5655	850	1478	1213	1661	1644	1276	440	2142	2119	2019	1047	1488	1305	1395	1944	1215	1381	1294	1391	2220	516
ENSG00000123095	79365	BHLHE41	948	493	1511	1814	2150	220	16	8	0	0	2	7	94	8	7	10	16	31	13	186	310	428	9	23	10	228	109	6	22	16	149	27	44	156	167	96	10	117	190	69	513	267	167	60	245	256	8
ENSG00000145692	635	BHMT	0	0	0	0	0	0	317	5	0	0	0	0	19	8	0	1	2	1	4	0	0	0	58	21	15	9	2	27	0	0	0	0	0	1	0	4	0	0	0	8	41	0	0	0	0	0	0
ENSG00000132840	23743	BHMT2	0	0	0	0	0	0	0	0	0	0	0	0	0	0	0	0	1	0	0	8	9	7	1	0	0	0	0	0	0	0	0	0	0	3	0	0	0	0	0	0	8	0	0	0	0	0	0
ENSG00000122870	80114	BICC1	60	22	5	17	43	121	85	115	106	159	1361	110	17	862	128	1957	279	129	244	47	9	5	1660	283	1020	2457	1879	2377	71	806	105	323	702	170	17	79	7	52	119	444	19	736	95	76	554	133	1194
ENSG00000151746	636	BICD1	208	650	263	222	182	255	627	163	276	379	171	265	161	644	394	598	758	810	862	630	653	742	466	399	482	434	496	385	419	366	496	342	305	367	411	304	579	482	796	374	421	541	968	683	630	662	463
ENSG00000185963	23299	BICD2	2968	3645	2608	1880	2330	2817	2931	1755	3328	3453	2422	1678	2888	5429	3333	3727	2420	2593	2020	1562	1869	1654	4458	3780	2953	2601	3190	3557	5220	4294	3670	3321	2724	3461	3636	3360	2591	2605	2924	3206	2224	3614	5055	3685	3855	2889	3089
ENSG00000135127	92558	BICDL1	1011	1244	878	1324	900	1233	1382	1351	792	901	1015	525	742	1081	998	377	2682	3058	2449	1862	2398	2635	1486	1185	569	655	1029	468	986	1191	1629	2177	1377	1642	2756	1462	1258	1721	2618	1287	2216	966	1812	1411	1409	983	703
ENSG00000162069	146439	BICDL2	6933	5621	1264	1970	1808	2032	1009	1241	1535	1047	1107	1765	2355	764	995	1299	1978	2271	1041	1702	2811	1479	1365	1922	1427	895	1237	1026	1283	1799	1570	1106	2137	2485	2648	2402	1557	1229	1763	2716	1319	1026	662	998	465	985	1073
ENSG00000063169	29998	BICRA	77	62	43	66	50	29	85	54	104	115	33	26	61	79	59	97	57	92	86	36	79	67	140	81	52	86	55	66	60	64	75	77	56	38	69	90	44	88	86	67	88	64	110	64	84	79	83
ENSG00000112624	23506	BICRAL	996	802	527	657	402	674	815	1057	724	657	803	766	1005	534	597	518	1086	791	653	525	1056	1124	634	661	569	563	968	924	578	564	502	601	925	492	674	694	848	461	558	444	1332	715	629	323	466	607	842
ENSG00000015475	637	BID	5938	7173	3639	2623	3716	3246	3974	2824	7145	6937	4252	5911	3914	5586	3902	3867	2630	3628	3190	3785	4704	4219	5053	5229	4285	3147	4497	4248	4422	6319	4887	4051	3885	5281	1773	3966	2346	3310	3216	8450	2601	3535	3451	2853	2429	2076	4075
ENSG00000100290	638	BIK	660	2619	1149	1828	1348	613	968	347	1759	1474	699	1052	845	879	936	803	290	775	270	561	548	292	2592	1380	304	840	1070	396	967	2075	1164	353	167	829	951	720	796	2665	3273	1221	509	1797	1210	1700	487	447	485
ENSG00000136717	274	BIN1	4828	4488	9580	4146	6464	5651	4318	8098	5643	6188	5901	6635	6106	11307	5692	5706	5867	10053	6126	5924	6933	5266	5816	6701	4697	2739	4317	5105	4641	6095	5537	6262	5769	6723	5690	5142	5093	9622	7078	7622	3132	3319	4429	4640	4201	4075	7351
ENSG00000110934	51411	BIN2	73	105	22	427	97	44	33	1796	631	493	104	110	143	347	93	99	8	17	2	83	215	208	34	83	980	432	676	145	10	25	84	155	18	13	50	18	24	53	48	129	145	26	43	46	52	53	222
ENSG00000147439	55909	BIN3	569	529	1445	1268	1486	482	843	399	1589	1560	484	1044	969	1144	289	484	371	501	522	455	429	282	1355	1016	924	684	772	905	1324	1771	790	725	1031	524	511	475	605	934	1894	453	552	1164	901	862	741	599	410
ENSG00000110330	329	BIRC2	3491	4075	2982	4259	4381	2730	2914	3706	2842	2669	2169	3291	2597	4091	1489	2408	5362	4199	4327	2333	4418	5234	3263	3749	3576	3214	4418	1783	2041	2267	2445	3595	4563	2658	4287	2325	2498	2071	2664	3204	7089	2831	2741	2501	2202	3129	3185
ENSG00000023445	330	BIRC3	2309	4589	1333	2151	1924	331	1214	1004	605	479	599	591	489	969	451	3437	2175	2848	2412	10999	21930	22608	1156	708	713	2014	1421	112	392	381	1290	1299	628	725	851	857	177	873	556	828	2089	770	1307	1759	1693	2000	436
ENSG00000089685	332	BIRC5	2061	2018	8421	4264	5642	872	6784	9592	6580	10454	3295	4063	4367	10362	4003	4524	3294	4938	7598	5623	3903	4537	12720	13256	8164	3642	12658	6421	8077	4624	5607	11499	7064	820	833	1620	2706	9655	5635	1920	2336	3528	13924	11840	12780	8464	6227
ENSG00000115760	57448	BIRC6	15729	12473	17007	16209	13822	12890	19162	12781	18902	19430	15213	17612	16595	15940	19598	16189	14547	24244	26381	15326	21769	18060	8985	11119	12937	12220	14132	12665	14444	15476	11100	15032	18203	18749	27616	20657	14909	14050	19142	21098	16768	16244	21132	13621	15765	13855	17376
ENSG00000101197	79444	BIRC7	2	3	0	0	1	7	0	27	55	8	4	2	14	9	0	0	9	1	1	0	1	3	5	2	2	9	1	9	0	3	0	2	0	16	4	6	16	1	0	12	19	1	1	8	6	2	0
ENSG00000134897	54841	BIVM	2488	2086	774	679	716	1279	4203	655	1046	1197	1317	1180	1025	1027	1305	2314	525	285	607	1558	1627	775	1426	1656	928	290	697	1211	2090	1807	2076	1603	1262	1603	1626	1606	2535	433	729	2358	1130	1208	1030	564	830	800	782
ENSG00000270181	100533467	BIVM-ERCC5	4	2	0	0	1	0	1	1	0	2	0	1	0	1	2	1	0	1	1	1	4	0	0	6	0	0	0	0	2	2	1	1	1	0	2	2	0	1	0	2	1	0	1	1	0	0	0
ENSG00000281406	101669762	BLACAT1	756	1325	347	239	367	495	522	66	211	352	300	259	716	414	511	152	1031	151	177	653	1051	546	1680	913	10	17	7	17	177	571	1068	409	404	1233	1200	1775	379	980	1355	696	993	1418	78	80	103	204	204
ENSG00000166619	10904	BLCAP	5638	4746	3522	2779	3578	3821	2481	10897	4038	4158	3127	4361	5139	8296	3674	3412	4928	5045	5884	3339	5074	4683	5586	6427	5749	4532	2647	3224	6313	4133	2328	5097	6391	5208	4257	5757	2470	3722	3583	8119	6302	3365	3405	2520	2669	2363	5457
ENSG00000259571	414899	BLID	0	0	0	0	0	0	0	0	0	0	0	0	0	0	0	0	4	0	4	0	0	0	0	0	0	0	0	0	1	2	0	0	0	0	0	0	0	0	0	0	0	0	0	1	0	0	0
ENSG00000136573	640	BLK	0	0	0	0	0	0	0	0	1	0	2	0	0	0	0	0	0	0	0	0	0	0	0	1	0	1	0	0	0	0	0	0	0	0	0	0	0	0	0	0	0	0	1	0	0	0	0
ENSG00000197299	641	BLM	1416	701	2491	730	1076	776	2851	1531	1603	1851	1421	987	937	2537	1157	1934	922	1078	1684	1797	1015	645	6720	6756	1499	401	2268	1327	3348	2864	1131	3049	1490	655	661	702	1111	2609	1944	1058	839	1203	4833	3523	3505	2023	1875
ENSG00000108578	642	BLMH	1192	1892	3024	2165	2133	2236	1207	3056	2694	3294	6356	4766	1975	6886	2011	2362	3276	2654	7237	3858	2612	2783	3890	4791	5579	2654	7442	3706	1834	1260	5385	6333	3906	1198	1964	802	1326	2020	2087	2738	1826	2333	2516	1219	1358	1013	3434
ENSG00000095585	29760	BLNK	620	165	101	187	212	179	256	381	1	2	38	9	420	34	82	42	58	25	6	367	769	294	40	30	667	211	182	441	73	10	74	23	20	91	61	161	159	92	365	102	296	424	109	65	93	264	72
ENSG00000135441	2647	BLOC1S1	2108	1981	2845	2711	2439	1875	3208	2059	1877	2378	1372	1764	2778	2706	2641	1350	1147	1160	2041	2308	2604	2304	2393	2316	2164	1016	2359	1241	2325	2778	2317	1653	2007	1888	2118	2221	2403	3951	4500	1979	1801	1315	3211	2628	2914	1983	2367
ENSG00000196072	282991	BLOC1S2	1598	1797	1971	742	1460	766	1136	910	1231	1175	1124	1076	994	1069	1017	996	1224	1279	1524	721	648	744	2011	1556	1357	662	2157	1270	2335	1788	824	1532	1347	1316	1317	1525	1837	2576	3541	945	264	1441	2573	2146	2105	1511	779
ENSG00000189114	388552	BLOC1S3	545	653	374	305	322	382	435	375	660	683	373	363	355	451	356	405	581	439	746	355	575	552	788	681	444	411	394	402	460	474	519	678	426	639	619	553	292	337	378	570	521	321	588	406	481	359	560
ENSG00000186222	55330	BLOC1S4	1058	1091	1081	1003	1361	740	985	1519	731	924	596	1141	598	1248	518	788	762	719	832	632	747	619	1106	878	1232	1028	1792	1112	1144	1115	869	942	870	538	623	493	1124	1060	1215	968	664	1029	1100	1133	812	1098	1307
ENSG00000188428	63915	BLOC1S5	1151	1159	923	1040	757	1006	1177	1759	1104	1190	1390	1689	1719	1593	823	1356	1472	1475	1852	988	1069	908	1307	1681	904	658	1975	1512	1128	1015	760	1719	2315	1008	1291	1094	1715	1087	1260	879	1471	864	915	813	756	887	1201
ENSG00000259040	NA	BLOC1S5-TXNDC5	2	3	0	0	0	1	2	0	0	1	4	3	0	1	0	0	0	2	0	0	0	0	1	1	0	2	0	0	1	3	2	1	1	1	1	0	2	2	1	0	0	1	1	0	1	1	0
ENSG00000104164	26258	BLOC1S6	6100	5010	6720	5555	5892	2970	5885	5014	4849	4655	3367	3677	3725	5633	3662	5466	3688	3271	5056	4163	6912	6277	7219	6532	3022	1882	3919	2738	4599	4999	3714	7670	6282	3572	3839	3156	4245	4676	6183	4153	2330	4499	5718	4399	4224	4169	5075
ENSG00000138688	84162	BLTP1	7049	7348	5384	9687	7036	4370	7355	4827	8048	9566	2424	5935	5674	4193	5498	6589	5958	5557	4565	3941	5844	4705	6501	4828	10221	10706	7220	7513	4711	6300	4776	4520	6212	4026	5605	5616	5259	4432	8150	6069	14577	6857	9932	4716	8411	10106	6550
ENSG00000007202	9703	BLTP2	25631	13962	27835	14465	25347	16111	19438	26596	19962	24689	47344	48881	13870	26512	12244	13450	23171	29706	38906	17006	15048	13235	31450	22670	19098	18396	31962	18558	17105	14825	20576	35621	32536	22252	20198	22429	13613	20463	23461	30777	19044	17956	24815	14270	12137	8696	32980
ENSG00000065060	54887	BLTP3A	1658	2331	1944	1934	1371	1975	1635	3819	1903	1872	3241	2371	2045	2053	2058	2971	4268	4626	3551	2633	2875	3484	2478	2918	1770	1784	4117	2510	2092	1799	1815	3226	3068	1336	2635	1684	2980	1800	2210	1717	4433	1079	1868	1091	1651	2352	2697
ENSG00000111647	23074	BLTP3B	750	1123	2297	3166	2681	1680	1682	3115	6377	5754	2108	4430	1875	4673	1690	2547	786	1785	1619	1275	1655	1924	2286	2383	1573	1271	1980	1287	1350	1549	672	2738	5481	1774	2392	1539	4210	3151	3523	2371	2378	1322	2818	1786	2097	1646	2677
ENSG00000106605	644	BLVRA	119	1421	695	641	776	296	448	120	339	308	1261	1927	326	205	534	824	242	547	456	373	274	643	743	695	779	161	374	89	429	591	469	173	346	1469	899	712	54	1727	2042	2171	45	48	3593	2622	3852	2674	19
ENSG00000090013	645	BLVRB	2459	3927	6519	7610	8573	1499	1087	2583	4178	3990	1781	2043	3682	1864	1566	1737	3303	3178	2643	3681	5639	6229	3464	4734	2921	2760	2347	1834	1299	1905	1780	2602	3165	1962	2206	1337	1169	2955	2005	1593	3202	919	3209	3100	3473	3378	1821
ENSG00000117475	8548	BLZF1	3369	3321	1525	1022	1514	969	1501	841	1677	1525	802	1595	1137	1780	1228	1504	1557	1477	3632	1445	2317	2340	3334	2163	927	1000	1266	1173	1203	1149	913	1805	1766	2163	2951	1929	722	1057	1385	1839	3039	1064	1617	1457	1349	1305	1280
ENSG00000133794	406	BMAL1	1432	1579	557	525	576	382	491	596	464	586	389	627	690	513	391	490	415	502	815	686	748	812	608	904	344	346	275	211	469	582	325	583	752	367	396	336	412	495	423	699	530	687	369	408	407	394	304
ENSG00000029153	56938	BMAL2	1868	2530	1812	1810	1479	957	1585	762	1271	1277	1375	1515	1154	1938	1211	1433	1186	4318	1071	6840	11636	9945	2096	2008	1737	1747	2962	1722	3469	2234	2390	2268	1530	993	1839	1197	1214	3789	4189	1422	920	941	5475	4355	4401	3018	1130
ENSG00000166780	89927	BMERB1	25	18	2	2	8	29	121	4	5	7	9	4	42	13	11	7	96	11	6	11	14	11	118	54	19	6	18	19	19	10	20	16	28	351	534	483	34	25	108	25	18	17	37	32	7	28	8
ENSG00000104081	90427	BMF	896	283	46	655	200	276	169	385	1472	672	51	805	442	1143	780	1121	443	277	226	210	823	918	184	288	437	644	78	160	371	769	64	93	112	155	804	66	824	20	178	654	494	372	190	79	216	340	387
ENSG00000168283	648	BMI1	1689	2440	1556	1411	1392	1464	2239	2032	1880	1788	1601	1698	1542	1330	1392	1597	1559	3068	3943	2009	2400	2097	3302	1923	1209	852	1208	822	2281	3617	1505	2597	1846	1333	2184	1331	1844	1943	2498	1774	1704	2066	2774	2253	2792	2514	1637
ENSG00000168487	649	BMP1	319	351	958	1023	1152	185	411	396	713	617	366	544	493	494	142	449	603	717	614	137	193	376	694	419	806	784	645	1098	514	770	339	541	715	128	247	145	264	448	959	132	597	563	584	403	562	572	313
ENSG00000163217	27302	BMP10	0	0	0	0	0	0	0	0	0	0	0	0	0	0	0	0	0	1	0	0	0	0	3	0	0	0	0	0	0	0	0	0	0	0	0	0	0	0	0	0	6	1	0	0	0	0	0
ENSG00000130385	9210	BMP15	0	1	0	0	0	0	0	0	0	0	0	0	0	0	0	0	0	0	0	0	0	0	0	0	0	0	0	0	0	0	0	0	0	0	0	0	0	0	0	0	0	0	0	0	0	0	0
ENSG00000125845	650	BMP2	104	56	407	1654	1043	56	2	1073	5	3	271	111	373	471	12	305	1987	1606	1779	118	612	1157	6	20	1288	2794	1041	739	12	30	5	299	436	2	13	3	51	18	34	15	711	224	410	359	310	658	308
ENSG00000138756	55589	BMP2K	4334	8255	3786	4002	3920	2284	6213	1418	2436	3521	2389	2960	2081	1786	4241	3456	1545	4334	5849	2151	2234	2321	4341	3154	1888	1620	3217	1666	3583	2935	4095	4063	3313	3606	5234	5129	2988	2904	7051	2646	3862	2145	4667	2859	4375	3825	5841
ENSG00000152785	651	BMP3	56	3	0	0	0	0	0	0	0	0	0	0	0	0	0	1	0	0	0	15	13	1	1	0	0	2	0	1	2	1	0	0	0	0	0	0	0	0	0	0	4	2	47	8	20	98	0
ENSG00000125378	652	BMP4	9063	21997	7060	3902	6755	8542	9860	3745	20425	26967	11854	10523	4204	6651	13090	6785	13407	13106	13230	3852	5092	2086	9589	5700	8581	14278	13989	14464	22778	14180	11985	4234	6155	17083	26003	12383	6185	19214	31777	10799	2621	22681	24980	22280	18870	24561	11265
ENSG00000112175	653	BMP5	1	0	0	0	0	0	0	0	0	1	0	0	1	0	0	0	0	43	6	0	0	0	0	0	0	0	0	0	0	0	0	0	0	0	1	0	0	0	0	0	0	0	1	0	0	1	0
ENSG00000153162	654	BMP6	3	6	11	6	15	30	27	2	19	17	73	11	1	13	1	4	10	14	23	2	0	5	221	29	5	0	4	13	29	82	0	22	10	1	4	5	11	35	16	15	6	17	41	50	67	46	22
ENSG00000101144	655	BMP7	3602	8705	6777	3469	4241	6559	5725	4378	17424	14081	11225	8341	3521	6068	9029	11321	84	4035	1100	3505	3118	4723	4083	5182	11491	9444	8212	6851	7374	14410	4	2793	7378	6542	1436	1676	5255	9438	12181	13872	4474	7775	7747	6003	4513	4354	9514
ENSG00000183682	353500	BMP8A	1	1	1	1	1	1	5	5	3	3	16	2	3	19	5	6	9	11	74	2	1	4	24	17	34	10	32	19	3	7	11	5	8	0	8	2	22	16	33	5	23	32	36	31	26	24	24
ENSG00000116985	656	BMP8B	408	456	720	377	420	139	186	495	136	170	528	232	423	167	161	175	830	578	985	739	1195	696	283	341	747	560	716	784	174	434	653	405	339	13	353	20	423	497	615	73	281	491	703	650	535	511	489
ENSG00000164619	168667	BMPER	15	35	0	2	0	4	11	0	15	7	0	4	20	3	4	20	0	1	5	0	0	1	0	0	0	0	2	0	0	2	0	1	3	149	121	114	0	0	0	3	1	16	4	1	0	5	1
ENSG00000107779	657	BMPR1A	2469	2603	2664	3166	2885	2050	2880	2961	4052	4147	2260	2765	3688	3448	2649	2676	5485	4082	5741	1924	2648	1909	4427	3432	3072	2594	3893	4385	3624	4817	2629	3242	3034	3453	5089	3516	5338	3115	3942	2529	2226	3781	4548	2731	3326	2926	2940
ENSG00000138696	658	BMPR1B	1	0	2	3	2	4	3	15	0	0	3	0	4	23	0	1	6	17	7	0	3	2	131	1	8	19	61	98	8	5	2	0	1	1	3	4	49	2	3	2	9	1	746	193	705	370	4
ENSG00000204217	659	BMPR2	1610	1411	1633	2310	1812	1658	1669	984	2908	3099	1587	2681	784	1173	3032	2741	2036	3475	2267	1199	1598	1239	1275	1348	1634	2326	1394	1294	1384	1813	735	1409	1893	3587	7057	3343	1337	2303	3768	3703	2093	1886	2017	1153	1427	1552	1832
ENSG00000165733	9790	BMS1	5021	4190	6258	5352	5809	3163	5847	4517	4942	4918	4269	3908	4339	6355	5625	7316	5522	6754	9726	8284	8861	5483	9413	7604	5067	3727	7474	6144	6364	6177	3817	5834	4696	4601	3582	4248	5760	5504	5311	4246	4420	4502	7409	6103	5659	4167	4841
ENSG00000164603	154743	BMT2	962	1242	491	527	399	630	440	882	839	595	594	676	600	688	969	458	596	353	878	529	715	548	589	744	727	714	521	743	545	807	700	786	899	969	719	711	680	771	1268	543	623	441	967	543	965	1105	527
ENSG00000102010	660	BMX	0	1	7	11	7	0	1	0	0	1	0	1	3	1	0	0	0	0	0	0	4	0	0	0	0	1	0	5	0	2	1	2	0	4	2	5	0	22	63	5	0	8	0	1	0	0	7
ENSG00000169594	646	BNC1	0	0	0	0	0	0	0	0	0	0	0	0	0	0	0	0	0	0	0	0	0	0	0	0	0	0	0	0	0	0	0	0	0	0	0	0	0	0	0	0	0	0	0	0	0	0	0
ENSG00000173068	54796	BNC2	0	0	0	0	0	0	0	0	0	0	0	3	0	2	0	0	0	0	0	0	0	0	0	0	0	0	0	0	0	0	0	0	0	0	2	0	0	0	2	0	0	0	0	1	0	0	3
ENSG00000113734	662	BNIP1	912	994	889	735	889	476	751	803	706	734	517	410	535	1035	378	390	1370	976	1304	1125	1516	1861	1171	1046	899	291	816	597	534	818	645	940	1001	469	510	432	441	989	562	437	1284	412	1037	713	980	803	505
ENSG00000140299	663	BNIP2	2383	3217	2307	2384	1847	2163	2263	2045	2455	2478	2376	2282	3029	2072	3057	3914	3391	2356	3523	2291	4982	4959	2694	2918	1573	1440	1375	1697	2753	2317	3747	4897	1688	4997	8522	3748	2636	2008	2261	3369	2342	3101	5191	4014	4488	5195	2358
ENSG00000176171	664	BNIP3	0	0	1	8	1	840	829	10312	2	2	933	1047	5971	6236	480	1025	4	1	1	1689	2668	2347	1387	3468	10002	6238	4494	6812	635	832	736	2297	2542	2755	2159	1931	687	0	9	2366	3059	2	0	157	116	3	5
ENSG00000104765	665	BNIP3L	1342	1190	2807	9855	6341	1281	783	2253	6753	5330	1158	1940	3371	1956	477	1424	1509	1415	971	634	1791	1703	1767	2629	3827	5845	943	2784	882	2569	672	1163	1292	1341	2382	1094	1008	756	2849	1140	1503	4513	1184	596	893	1369	640
ENSG00000189325	389384	BNIP5	1989	1138	316	805	1068	387	194	426	786	555	177	1037	1590	936	716	1384	1190	1411	1148	790	2523	2513	1259	1502	516	591	316	81	421	352	656	359	473	593	929	457	224	56	137	2332	3463	755	130	107	358	591	193
ENSG00000163141	149428	BNIPL	38	26	20	96	32	26	18	32	45	45	8	16	76	35	15	58	127	55	70	32	160	198	52	25	109	140	53	129	17	25	88	23	25	29	28	35	10	28	24	37	306	44	28	20	36	48	20
ENSG00000144857	91653	BOC	0	0	0	0	0	23	0	0	8	10	46	17	26	47	40	259	68	52	144	1	0	4	16	1	215	700	712	111	2	33	0	23	11	1	0	0	15	1	0	0	1	24	2	1	1	2	165
ENSG00000145919	91272	BOD1	3801	5312	2116	1635	1574	3857	2177	2652	3465	2928	3290	2415	3183	5129	2080	2908	2487	2132	2892	4620	4490	4551	3141	3343	3750	1685	3139	3740	2991	4019	3457	3644	4354	1409	1264	1030	3278	3840	2275	2350	3950	2772	4899	3298	4312	4012	3236
ENSG00000038219	259282	BOD1L1	5228	5156	2697	3541	3093	1991	3880	2724	3208	4110	1251	2579	3044	3226	1836	2662	4139	3568	3155	2043	3447	3433	4019	3218	4399	3196	4210	3572	2206	3384	2515	3376	2580	2081	2532	2088	3054	1919	3438	2452	5221	3901	2507	1548	1804	2113	3212
ENSG00000228075	284257	BOD1L2	0	0	0	0	0	0	4	0	0	0	0	0	0	0	2	1	0	0	0	0	0	0	0	0	0	0	0	0	0	0	0	0	0	0	0	0	0	0	0	0	0	0	2	0	0	0	0
ENSG00000176720	666	BOK	744	1238	1750	522	1229	611	203	1088	2141	2203	1086	1076	873	2078	1454	861	3218	3929	4163	494	920	1068	2150	1226	2126	1433	1504	2211	630	595	342	1866	2258	334	1223	508	459	1295	1260	1091	303	2167	1167	954	1350	713	537
ENSG00000178096	51027	BOLA1	506	648	467	298	436	236	423	425	460	491	114	257	506	441	178	310	518	274	530	332	670	484	1474	994	651	421	719	595	208	286	356	470	622	294	344	162	179	349	333	190	305	468	603	584	565	514	340
ENSG00000183336	552900	BOLA2	0	0	0	0	0	0	0	0	0	0	0	0	0	0	0	0	0	0	0	0	0	0	0	0	0	0	0	0	0	0	0	0	0	0	0	0	0	0	0	0	0	0	0	0	0	0	0
ENSG00000169627	124907841	BOLA2B	0	1	6	1	1	1	1	2	1	1	0	2	2	3	0	3	1	2	4	0	0	2	3	0	0	1	1	1	0	0	1	0	1	3	0	1	0	3	3	0	4	0	0	1	0	0	2
ENSG00000261740	107282092	BOLA2-SMG1P6	941	872	1149	777	1306	646	380	557	415	398	480	380	477	653	719	475	798	845	974	946	1247	991	789	734	680	592	1021	594	602	696	289	1105	1513	838	844	798	747	811	579	481	985	364	400	498	365	335	736
ENSG00000163170	388962	BOLA3	981	1212	1972	1011	1586	1067	1645	1807	1406	1585	1634	1078	780	2682	1321	1364	1320	1852	3670	1385	1105	997	2367	2779	1232	780	1834	1059	1211	1469	1111	2690	2040	1696	1763	1388	810	1725	1172	1446	902	857	2387	2156	2208	1282	1953
ENSG00000152430	66037	BOLL	0	0	0	0	0	4	0	0	0	0	0	0	0	2	0	0	1	1	0	0	0	0	0	0	0	5	0	0	0	0	0	0	0	0	0	0	0	0	0	0	0	1	0	0	0	0	0
ENSG00000261236	23246	BOP1	11409	14067	14518	4598	8949	7705	6822	16556	4985	5014	8915	6513	5713	19395	5790	7556	10390	17761	20994	17603	10358	11183	12806	13332	16079	6795	20870	14419	19234	12983	12112	11967	8145	4466	3881	4063	16166	7594	4726	8847	2804	4999	4877	5148	3763	2279	32963
ENSG00000136122	79866	BORA	4380	2800	1506	1239	1216	968	5123	1389	1779	1752	1386	1983	1417	2527	1405	2119	575	702	1195	2908	2156	2342	2287	3207	1006	737	1734	1279	4522	3430	2008	3027	2487	1521	1181	1981	1296	1495	1127	2042	2370	1211	2514	1680	2484	1675	1725
ENSG00000165714	118426	BORCS5	1129	1570	601	766	547	708	1195	501	544	593	634	938	955	1257	564	577	633	1284	853	1254	2051	1371	776	698	625	545	990	546	653	945	834	800	747	1029	972	904	1199	1040	1309	709	1530	654	1122	660	774	712	1127
ENSG00000196544	54785	BORCS6	1046	703	861	855	854	496	616	586	675	645	635	546	728	610	721	763	748	903	797	867	1068	1477	605	532	487	456	733	416	668	507	438	824	698	553	502	381	782	735	932	441	910	362	392	303	337	322	562
ENSG00000166275	119032	BORCS7	927	775	972	684	1029	570	1161	571	1318	1339	677	1307	755	1047	1151	1424	220	417	546	352	195	169	975	993	974	496	838	919	900	1437	744	775	685	1749	1699	1916	2533	648	1042	1859	390	902	1308	826	774	552	862
ENSG00000270316	NA	BORCS7-ASMT	0	0	0	0	0	0	0	0	0	0	0	0	2	0	0	0	0	0	0	0	0	0	0	0	0	2	0	0	0	0	0	0	0	0	0	0	0	0	0	0	0	0	0	0	1	0	0
ENSG00000254901	729991	BORCS8	411	575	683	168	544	367	714	644	547	595	264	381	252	925	630	396	348	533	1226	425	262	251	1081	673	269	176	543	291	660	554	271	710	400	412	638	425	168	504	556	546	240	420	333	301	267	170	735
ENSG00000064489	NA	BORCS8-MEF2B	3	21	3	1	3	2	4	5	8	3	6	5	9	6	6	6	5	9	7	1	3	5	5	2	12	6	5	2	2	3	11	11	8	8	2	0	3	0	3	3	4	11	1	0	0	2	2
ENSG00000172331	669	BPGM	1095	1628	794	401	589	504	463	1035	516	470	472	548	536	628	627	665	669	625	736	525	650	790	598	643	932	465	1139	688	298	645	867	752	820	996	1341	711	207	636	562	378	741	469	1017	655	1155	1065	484
ENSG00000137274	670	BPHL	1158	973	1141	896	1201	2435	1526	1719	1437	1230	2637	3075	2427	1880	1502	2181	2618	3203	2973	1494	2114	1211	2212	2138	1399	1012	3008	2986	1625	1260	989	897	2612	1384	1716	1051	1826	1792	2095	1024	1539	876	1175	916	717	845	2036
ENSG00000101425	671	BPI	37	21	3	1	2	25	4	0	13	83	5	0	2	11	0	0	0	2	0	0	0	0	59	74	0	0	0	0	0	1	2	4	2	99	8	92	114	0	0	45	1	0	1	0	1	0	3
ENSG00000198183	51297	BPIFA1	0	0	0	0	0	0	0	0	0	0	0	0	0	0	0	0	0	0	0	0	1	0	0	0	0	0	0	0	0	0	0	0	0	12	0	0	0	0	0	0	0	0	0	0	0	0	0
ENSG00000131050	140683	BPIFA2	0	0	0	1	0	0	0	0	0	0	0	0	0	1	0	0	0	0	0	0	0	0	0	0	0	0	0	0	0	0	0	0	0	0	0	0	2	0	0	1	1	0	0	0	0	0	0
ENSG00000131059	128861	BPIFA3	0	0	0	0	0	0	0	0	0	0	0	0	0	0	0	0	0	0	0	0	0	0	0	0	0	0	0	0	0	1	0	0	0	0	0	0	0	0	0	0	0	0	0	0	0	0	0
ENSG00000125999	92747	BPIFB1	0	0	0	0	0	0	1	1	0	0	0	0	0	0	1	0	0	0	0	0	0	0	2	1	0	0	0	1	0	0	0	0	0	0	0	0	2	4	0	0	0	0	0	0	0	0	0
ENSG00000078898	80341	BPIFB2	0	0	0	0	0	0	0	0	0	0	0	0	0	0	0	0	0	0	0	0	0	0	0	0	0	0	0	0	0	0	0	0	0	1	0	2	0	0	0	0	1	0	0	0	0	0	0
ENSG00000186190	359710	BPIFB3	0	1	0	0	0	0	0	0	0	0	0	0	0	0	0	0	0	0	0	0	0	0	0	0	0	0	0	0	0	0	0	1	0	0	0	0	0	0	0	0	0	0	1	0	0	0	0
ENSG00000186191	149954	BPIFB4	0	0	0	0	0	0	0	0	0	0	0	0	0	0	0	0	0	0	0	0	0	0	0	0	0	0	0	0	0	0	0	0	0	0	0	0	0	0	0	0	0	0	0	0	0	0	0
ENSG00000167104	128859	BPIFB6	0	0	0	0	0	0	0	0	0	0	0	0	0	0	0	0	0	0	0	0	0	0	0	0	0	0	0	0	0	0	0	0	0	0	0	0	0	0	0	1	0	0	0	0	0	0	0
ENSG00000184459	254240	BPIFC	0	0	0	0	0	0	0	0	0	0	0	0	0	0	1	0	1	0	0	0	0	0	0	0	0	0	0	0	0	0	0	2	0	0	0	0	0	0	0	1	1	0	0	0	0	0	0
ENSG00000162813	10380	BPNT1	5745	4271	4171	5244	5435	1778	1775	3669	2673	2354	1129	1795	2062	3128	1642	1648	2566	2177	5391	1819	2561	2275	4718	3734	2930	3256	3668	2132	2078	2274	1232	2104	2872	2191	2582	1773	1004	2219	2394	2460	5899	1783	2537	2311	2067	1805	3822
ENSG00000104331	54928	BPNT2	16739	17736	8703	10089	11037	8792	6532	13725	4762	4998	6559	6174	3422	9375	7764	11197	6790	6827	11537	5183	6829	6887	9175	11148	16867	14682	15201	13212	10422	13395	8896	8946	9961	8798	13946	7205	15691	8767	7692	8111	8335	5147	10165	7315	6902	5896	24973
ENSG00000171634	2186	BPTF	1864	1961	2608	3956	2640	1642	5112	3259	4546	5901	1770	1978	3776	3444	3298	2986	3273	4430	4082	3083	4233	3447	3685	3567	4368	4174	3745	3950	1646	2532	3137	3038	3245	2518	3345	2754	2963	2719	4175	3691	4933	3545	5972	3840	3904	4255	3021
ENSG00000183753	9083	BPY2	0	0	0	0	0	0	0	0	0	0	0	0	0	0	0	0	0	0	0	0	0	0	0	0	0	0	0	0	0	0	0	0	0	0	0	0	0	0	0	0	0	0	0	0	0	0	0
ENSG00000183795	442867	BPY2B	0	0	0	0	0	0	0	0	0	0	0	0	0	0	0	0	0	0	0	0	0	0	0	0	0	0	0	0	0	0	0	0	0	0	0	0	0	0	0	0	0	0	0	0	0	0	0
ENSG00000185894	442868	BPY2C	0	0	0	0	0	0	0	0	0	0	0	0	0	0	0	0	0	0	0	0	0	0	0	0	0	0	0	0	0	0	0	0	0	0	0	0	0	0	0	0	0	0	0	0	0	0	0
ENSG00000157764	673	BRAF	2552	3715	1022	1359	792	2063	2285	1960	2488	2185	1667	2346	1643	1714	2752	2519	2844	1952	2940	1661	2018	1664	1672	1624	2515	2113	2216	2003	1683	2040	1315	2015	2606	3718	4040	3198	1293	1423	1987	2149	3380	1821	3483	1858	2921	3161	2218
ENSG00000089234	8315	BRAP	2105	2646	1611	2097	1596	1895	1257	1490	1927	1768	1340	1670	2172	2658	1537	1666	2624	2631	3715	1812	2332	2214	2344	1899	1684	1250	1998	1620	1944	2122	1424	2353	2316	2644	2769	2103	2706	2613	3150	2159	2986	1728	2832	2421	2399	1854	2119
ENSG00000106009	221927	BRAT1	6206	5649	4949	2274	3054	5222	5872	5615	5662	6009	5935	6642	5200	10221	5544	4663	4806	4511	7500	7819	6895	7548	6907	4386	6278	2872	6040	4504	7727	7277	4986	7309	6765	6398	3252	5703	2431	6406	5423	5887	3275	2092	5629	5186	5349	3852	5956
ENSG00000012048	672	BRCA1	2097	1925	2861	1417	1492	1315	2713	3800	2256	3508	2169	2066	2201	4761	1911	1714	1668	2287	2797	3052	1928	1185	6375	6184	3419	1757	4433	3363	4236	3385	2985	4443	2786	1000	1014	1177	1613	3457	2974	1268	2230	1950	3714	2376	1676	1319	3232
ENSG00000139618	675	BRCA2	6647	2340	2465	1085	1381	1018	11912	1722	2326	3323	2028	2216	2433	3355	2477	2605	594	1281	1760	3377	1581	669	4281	4418	1829	1225	3038	2218	6879	4749	1839	4349	2564	966	909	2010	4114	3543	3477	1542	1669	1988	7665	5461	5637	3626	2470
ENSG00000185515	79184	BRCC3	2660	2292	2391	1723	2133	2560	2301	3571	2379	2432	3496	5259	2996	4033	2436	2443	862	1350	1973	1699	1265	863	2460	3140	1584	1155	2290	1407	2656	1590	1607	5330	2338	3059	3511	3285	2903	4339	4136	3111	1501	1561	1574	1611	1060	835	3838
ENSG00000100425	23774	BRD1	3804	4267	2495	3014	2427	1461	3158	1975	3335	3143	2035	1258	2317	2838	2235	2497	4469	3481	3478	2007	3212	2662	3751	2889	2456	2697	3659	3244	2930	3231	2334	2584	2243	2334	2761	1861	1823	2662	2830	1474	3178	2780	2401	2133	1807	1865	3465
ENSG00000204256	6046	BRD2	2090	1746	2542	2043	2985	2282	1371	1762	1829	851	2216	2566	2583	2592	1024	2026	3923	2150	4234	2667	3181	4413	2227	1799	1574	1075	2736	2766	2467	1582	1537	1652	1805	852	2217	1154	5535	1507	1617	3484	2605	1474	2009	1812	1933	1661	2959
ENSG00000169925	8019	BRD3	1338	1363	723	617	607	932	1198	312	1056	1126	745	885	1281	1358	1423	2430	1970	930	1585	660	1050	944	1122	1413	1424	1105	1292	1467	1142	1182	1309	1032	1182	714	821	567	1015	839	1142	677	1163	1581	1570	1098	1003	1153	1196
ENSG00000235106	266655	BRD3OS	525	1121	278	199	310	1242	573	319	640	815	762	779	744	910	1133	1202	974	926	2701	473	257	231	866	781	1018	494	555	860	815	901	759	832	1009	1332	1065	938	730	440	948	1077	267	1362	1063	756	883	624	864
ENSG00000141867	23476	BRD4	1480	2147	775	964	715	580	1407	1070	1363	1591	665	653	943	1224	1162	1119	876	1626	1402	752	884	1040	1852	1290	895	1358	1230	703	1144	1080	909	1418	838	656	1104	918	644	1037	1031	958	1781	1031	770	716	427	507	1477
ENSG00000166164	29117	BRD7	6407	6664	4853	4037	4228	6127	5534	4440	5036	5326	5196	7399	5867	7391	4908	4577	6087	5501	4886	5172	5599	4063	5727	7914	5120	3608	6569	5393	6116	5999	4778	9121	7056	6181	12249	5273	5858	6402	8335	4444	4297	4452	3895	6172	3177	4599	7561
ENSG00000112983	10902	BRD8	1496	1241	1793	1633	1413	1668	2103	1721	1700	1552	1580	1762	2030	2380	1209	1724	2700	2472	2656	1809	2140	2315	3275	2747	2130	1118	1606	2150	1603	1816	1698	1633	2833	1346	2155	1431	1424	2540	1922	1801	2244	1795	2846	1758	2453	2270	1340
ENSG00000028310	65980	BRD9	1296	1878	1780	1525	1850	1054	1432	1437	3121	3242	3753	4270	2258	3260	3018	2491	1990	2087	2307	1815	1998	1805	3633	2841	2302	808	2387	1799	1634	2751	1494	3170	3487	2014	2254	2122	1371	3320	2090	2239	2898	2033	3009	2098	2518	1710	2756
ENSG00000137948	676	BRDT	0	0	0	0	0	0	0	0	0	0	0	0	0	2	0	0	0	2	0	0	0	0	0	0	0	0	0	0	0	2	0	0	0	0	0	0	0	0	0	0	0	0	1	0	0	0	0
ENSG00000185024	2972	BRF1	1821	2543	2554	1276	2254	1618	2174	1667	2948	2827	2149	2576	1697	2027	1674	2303	2210	3142	3386	1741	1643	1414	3065	2555	3591	2220	3853	2867	3369	2873	1870	2469	2439	1414	2862	1238	2122	3260	3982	1680	1333	2906	3778	3720	3222	2826	3406
ENSG00000104221	55290	BRF2	324	414	807	832	754	279	1144	1800	1246	1155	878	957	730	2583	1018	1536	1547	1486	1817	349	548	697	658	488	1145	1179	931	1186	610	1220	511	386	552	333	291	239	455	1762	771	1344	928	1029	729	623	563	645	882
ENSG00000164713	25798	BRI3	4912	4956	2426	1643	2035	2593	3516	2034	3277	2822	2162	2003	1977	1685	3863	1841	3191	2886	2930	3063	5271	5060	3772	3813	2024	2003	1965	1543	3521	3805	2613	2434	2980	3877	3110	4124	1992	1681	2076	3031	2679	1702	4077	2273	3785	4310	2462
ENSG00000184992	140707	BRI3BP	8709	4266	14622	15509	12763	4394	5693	11746	7167	9084	5586	4222	6569	9114	4915	4289	7328	7591	9351	7382	7198	4382	11706	11107	8831	8157	13291	7976	8450	9006	7219	11723	7964	4353	4838	4856	5935	14873	12792	6152	7229	6435	16053	10219	10874	6099	13125
ENSG00000182685	283870	BRICD5	169	108	120	66	117	61	91	90	56	84	124	49	140	31	71	99	225	134	118	108	275	113	190	144	160	70	129	101	99	136	139	163	82	83	140	59	44	271	176	52	177	57	110	184	103	127	91
ENSG00000078725	1620	BRINP1	2	1	12	0	11	0	8	6	18	18	0	40	15	29	1	0	0	0	6	0	0	0	0	0	0	0	1	0	0	0	0	188	34	0	0	0	0	0	0	18	3	1	0	3	1	2	15
ENSG00000198797	57795	BRINP2	4	0	4	4	2	2	2	0	0	0	0	0	4	33	1	2	0	0	36	0	0	0	0	0	1	0	0	0	0	0	0	0	3	5	25	6	0	10	8	6	14	0	10	12	5	6	5
ENSG00000162670	339479	BRINP3	3	3	0	0	0	0	1	0	0	0	0	0	14	96	0	0	0	0	0	4	0	0	0	0	547	757	1451	457	0	0	0	0	0	1	0	1	12	0	0	0	6	0	0	0	0	0	3
ENSG00000136492	83990	BRIP1	937	786	1350	1112	942	364	2014	1433	2224	3370	938	930	1647	2379	1117	1607	987	820	1415	964	1048	545	2228	1861	1970	1477	2517	2446	1850	1729	1722	1736	1110	434	526	516	730	2319	2342	574	775	1035	3634	3380	2295	1876	1207
ENSG00000113460	55299	BRIX1	2185	2045	3912	2680	3214	2094	2077	2926	2453	2783	5446	4785	2380	3962	4870	3091	3964	3097	5081	3125	3437	3378	4774	4376	2983	1376	4333	3121	3520	3428	1989	5344	4769	1673	1495	1457	2313	5116	2314	1958	3134	2501	4718	3409	4010	2836	6452
ENSG00000254999	55845	BRK1	2061	2450	4040	3384	4110	3795	3909	4117	3578	3141	3942	4675	1858	3674	3444	3552	2822	3046	3700	2115	2553	2135	3900	4726	3561	2326	3823	3042	3546	3957	3020	4781	4352	4617	5032	3635	4081	4186	4403	4530	1892	3137	3766	3575	2992	2717	4759
ENSG00000132016	79173	BRME1	213	240	305	565	606	259	196	392	439	729	1183	304	418	131	577	333	74	129	263	341	421	138	729	650	228	116	163	140	197	135	222	303	108	287	164	237	57	542	287	416	322	215	71	94	52	56	269
ENSG00000174744	25855	BRMS1	3797	3736	4432	1433	3054	2485	2908	4200	2032	2373	3492	4799	2032	5014	2164	1926	1713	5312	5422	3177	3066	3267	4343	4754	1912	949	4177	1847	4814	3661	1873	5190	4769	2444	2603	2391	2660	4376	3751	3705	1693	2653	3749	4340	2829	1847	4713
ENSG00000100916	84312	BRMS1L	161	214	378	270	374	208	324	544	408	410	308	429	178	384	339	317	232	292	563	206	119	104	661	643	496	342	556	461	620	415	203	307	313	215	410	189	415	647	699	202	119	328	590	435	480	409	686
ENSG00000162819	148362	BROX	10975	8503	5739	6799	6637	5048	4154	5745	6350	5923	3627	4305	6117	5030	3869	3784	7479	3624	8588	2961	4569	4190	12628	9906	5071	5527	5148	4555	3246	2694	3464	6071	6987	5774	9563	5516	3049	5330	5504	5875	8432	5506	4928	4291	3922	4008	5980
ENSG00000156983	7862	BRPF1	1373	1830	1987	1329	1858	1528	2058	1583	1941	1952	1875	1810	1254	1909	1509	1375	1731	1775	1783	1256	1417	1668	2390	2513	2129	1250	2378	1777	2275	2320	1175	2700	1971	2187	2490	1673	1555	2104	2017	1729	1573	1963	1503	1776	1293	973	2217
ENSG00000096070	27154	BRPF3	872	1089	826	1051	803	564	1040	1236	908	728	1069	2000	765	1176	1137	1569	1650	2334	1780	828	1135	1244	899	749	963	800	1317	926	641	539	317	887	1335	788	1402	936	1030	736	888	1218	1671	607	868	708	1149	979	1737
ENSG00000102239	680	BRS3	0	0	0	0	0	0	0	2	0	0	0	1	1	1	0	0	0	0	1	0	1	0	0	0	0	0	0	0	0	0	0	0	0	0	2	0	0	0	0	1	0	0	4	7	0	0	0
ENSG00000160469	84446	BRSK1	33	93	1	3	1	65	26	22	76	58	47	32	54	20	67	70	343	144	202	49	109	89	34	20	126	34	31	113	19	33	27	29	19	46	81	12	32	2	19	31	38	61	103	93	116	344	16
ENSG00000174672	9024	BRSK2	69	67	25	5	12	48	5	90	58	42	223	24	115	26	28	22	8	23	70	59	106	31	150	86	280	497	45	23	98	197	23	234	112	76	398	59	255	2	6	40	66	41	127	135	164	267	241
ENSG00000185658	54014	BRWD1	8095	6551	5619	6712	5556	3362	3507	7044	8998	8543	5081	7058	3379	5505	4986	10467	5674	3919	5255	3970	7493	7064	7315	9712	6489	7182	5327	7705	4751	6309	5739	5724	8300	4979	6591	5842	7298	4958	6037	7502	9769	4799	4136	2673	2877	3563	7754
ENSG00000165288	254065	BRWD3	3826	3166	2263	4561	3037	2244	1696	2279	5478	4127	2745	3307	6566	4193	2914	5620	1408	1187	1163	2398	3526	2583	2125	2179	3906	4123	3221	4162	1871	1843	2422	3260	2698	2766	2815	2260	4754	3323	4345	2572	4648	3059	2793	1508	1716	2176	2981
ENSG00000168000	26580	BSCL2	514	401	562	380	609	606	626	623	340	430	601	484	420	592	248	253	635	1312	1414	610	652	695	1061	849	567	443	919	560	382	369	440	741	1122	420	378	391	391	759	793	571	518	416	562	411	413	307	437
ENSG00000160058	55108	BSDC1	5517	6658	3494	3307	3962	4831	2163	3737	2826	2775	2739	3490	3568	3323	2063	2926	6491	6192	7497	2080	4142	5187	4820	3424	3868	3116	3405	2360	2025	2461	3223	3358	4002	6299	8516	5153	2453	2441	3722	4703	6805	1943	1717	1734	1601	2020	2757
ENSG00000172270	682	BSG	24220	19971	29489	22745	27855	25125	15862	13532	22316	21664	22226	21568	16991	20297	16890	25429	16644	30243	41545	18362	23123	17319	13857	12338	22191	11933	22449	14536	23862	23760	15418	22037	20336	23394	20920	20037	22144	32438	28742	19528	15971	21621	21740	18713	18031	20230	23579
ENSG00000164061	8927	BSN	8	12	0	2	3	17	33	37	18	9	181	16	11	13	44	11	31	85	30	32	23	13	27	21	8	2	11	11	29	11	6	173	16	11	26	9	73	16	27	17	5	8	29	14	24	4	77
ENSG00000162399	7809	BSND	2	0	0	0	1	0	36	4	0	1	3	0	1	2	1	1	10	6	12	2	4	9	1	3	0	0	0	0	0	1	0	0	0	0	0	1	0	0	0	0	8	2	0	0	0	0	0
ENSG00000188334	100131137	BSPH1	0	0	0	0	0	0	0	0	1	8	0	0	0	0	0	0	0	0	0	0	0	0	0	0	0	1	0	0	0	0	0	0	0	0	0	0	0	0	0	3	0	0	0	0	0	0	0
ENSG00000119411	54836	BSPRY	3778	5494	2103	2353	2453	784	1254	1276	1681	1738	1069	857	2071	1629	1026	1702	2299	2230	2468	1475	1652	1681	1773	1983	3469	2512	3434	2734	1297	1586	3506	2239	1739	1276	2040	1082	810	1632	1552	1081	1197	2200	3352	2541	2564	2490	842
ENSG00000109743	683	BST1	55	32	14	27	21	14	23	16	20	29	9	10	34	60	8	19	30	10	31	49	249	56	17	23	149	70	40	68	21	12	18	28	37	11	3	19	37	21	23	15	44	44	42	23	30	32	24
ENSG00000130303	684	BST2	118	89	3014	3694	3932	31	9	1	8	13	1	15	84	5	25	72	215	140	2109	16	11	4	1	15	4	3	1	1	24	16	7	5	1	1188	163	682	26	180	352	3	41	27	12	22	47	92	3
ENSG00000188909	390259	BSX	0	0	0	0	0	0	0	0	0	0	0	0	0	0	2	0	0	0	0	0	0	0	0	0	0	0	0	0	0	0	0	0	0	5	16	0	0	0	0	0	0	0	0	0	0	0	0
ENSG00000095564	9044	BTAF1	3796	4965	3765	3828	3526	2408	3162	4089	4284	4446	3488	3545	5850	3715	2761	3447	6846	4189	4018	2761	4953	3816	6679	5602	5466	3273	4991	7921	4414	4325	7014	4171	4298	4282	5486	4223	7040	4582	5085	4061	5956	3999	6879	4747	4784	4310	3572
ENSG00000064726	53339	BTBD1	7301	9088	8731	5446	7612	6855	7157	6740	6420	6177	6954	7115	4593	8203	6722	8689	5965	6510	12342	5051	6876	5425	5398	5305	8887	4696	10169	5123	4546	3398	7189	11661	9598	11216	21998	9636	7709	6665	7683	11266	10016	5426	9199	7731	7324	8409	8892
ENSG00000148925	84280	BTBD10	2965	2737	3250	3149	3961	2219	1771	2890	2057	2090	1986	2700	1501	2645	3285	1545	1496	2890	4356	1767	2296	2418	3538	3279	2055	1557	2534	1619	2496	2024	1561	2989	3972	1910	3070	1749	1944	3238	3583	2056	1839	1693	1724	1791	1373	1331	3533
ENSG00000138152	118663	BTBD16	169	89	29	37	40	54	64	40	45	55	96	47	241	132	15	20	28	20	40	37	85	39	50	112	33	31	28	10	19	53	133	85	37	60	68	121	125	89	82	51	139	73	30	13	11	35	15
ENSG00000204347	388419	BTBD17	0	0	4	0	6	0	0	0	0	0	0	0	3	0	1	0	0	0	0	0	2	1	0	0	0	0	0	1	0	0	0	0	0	0	0	0	3	0	0	0	0	0	3	0	3	3	0
ENSG00000233436	643376	BTBD18	0	0	0	0	0	0	0	0	0	0	0	0	0	1	0	0	0	0	0	0	0	2	0	0	0	0	1	0	0	0	0	0	0	0	0	0	0	0	0	0	0	0	0	0	0	0	0
ENSG00000222009	149478	BTBD19	114	116	52	59	78	39	97	13	22	48	26	21	65	135	26	22	182	61	76	21	36	46	68	42	56	64	70	168	11	11	72	32	27	91	91	95	110	29	23	34	171	138	14	4	19	45	14
ENSG00000133243	55643	BTBD2	3485	4491	2857	2216	2896	5906	4597	3466	9804	9025	5245	4726	5670	5237	4270	5540	5247	6527	6425	4493	4519	4251	4713	5683	9154	5944	9816	6519	3960	5739	4175	6951	4944	2372	1411	1148	4057	4220	4769	3701	2349	6529	4772	4624	4947	4368	5582
ENSG00000132640	22903	BTBD3	4906	3543	4284	3680	5912	1617	2589	1128	3796	4944	1343	1797	3162	5666	2439	1854	3302	3143	3839	3474	5834	3404	5245	4622	1505	1287	1749	1602	926	787	2906	1978	2826	4610	8070	3686	4367	1578	2295	801	1739	1249	2151	1515	1951	1828	2425
ENSG00000184887	90135	BTBD6	1660	2826	4442	2704	4556	1191	3353	2453	4515	4240	1695	2311	1209	2256	1480	2652	1871	3295	4374	1052	804	1044	3104	2065	3527	3389	4382	1592	2803	2044	255	2702	2236	1563	3187	1420	534	4242	3770	2049	1667	2434	7023	6446	5904	4188	2771
ENSG00000011114	55727	BTBD7	378	453	427	495	438	217	288	138	492	434	230	381	251	293	302	275	399	459	428	194	192	174	443	313	346	399	594	353	460	374	207	258	297	291	543	218	336	534	668	229	239	324	924	700	672	563	486
ENSG00000189195	284697	BTBD8	601	875	159	338	236	839	153	494	853	834	600	853	762	524	455	445	1259	902	516	423	815	556	588	707	796	1117	888	1036	267	643	897	508	759	735	955	535	652	246	523	650	1321	778	412	223	311	506	465
ENSG00000183826	114781	BTBD9	1535	1774	1463	901	1355	1826	480	1465	1653	1566	1280	1846	1081	924	1144	1559	1594	2283	3313	664	749	593	1804	1620	1158	924	1458	1015	845	836	661	1502	1879	2248	5026	2408	555	1147	2017	1824	2930	1184	638	600	859	793	1239
ENSG00000174808	685	BTC	605	1014	91	47	122	321	418	299	38	82	94	150	183	108	246	160	397	486	507	220	221	50	575	169	350	233	796	250	479	320	128	725	297	302	419	420	117	320	392	567	83	259	453	358	370	315	1347
ENSG00000169814	686	BTD	460	445	965	1029	1291	1274	790	877	1265	1210	992	2178	812	846	832	975	1021	789	1148	576	1526	1344	638	520	1516	1408	1347	1200	257	252	508	802	1165	2211	2594	1285	838	447	852	1490	1821	953	559	439	417	585	1032
ENSG00000145741	689	BTF3	21323	27369	23553	27612	25308	23622	17324	20770	26136	23993	16537	15495	18821	27216	16766	17619	14065	12731	16827	21767	32757	25509	27261	28564	27999	12561	15959	28583	19485	24237	21638	21338	39447	19927	20489	15176	30669	35374	20976	21522	25266	29693	35993	20334	27876	26632	16692
ENSG00000134717	91408	BTF3L4	3400	3815	1923	1998	1873	2383	1702	1811	2058	1914	1584	1243	1956	2108	2023	1787	2567	2042	2509	2289	3899	3589	2856	2456	1866	2066	2774	2826	1746	2364	1847	1949	1645	1677	2326	1609	2101	1980	2471	1688	2857	2658	2158	1510	1634	1776	1620
ENSG00000133639	694	BTG1	6517	5012	2523	5826	2833	2578	2808	1622	2179	2002	1516	1105	3260	1950	719	1062	3670	1885	2365	2054	5980	6797	1901	1087	3083	3064	1698	1907	1735	3193	2277	1814	1865	2097	3190	1806	5609	2753	4203	860	5395	3491	1983	1203	1568	2608	3804
ENSG00000159388	7832	BTG2	2740	2364	1059	1413	1402	2372	2712	338	3219	3670	1240	2534	5934	1600	1422	1140	1159	510	1677	987	2146	1447	727	788	1710	977	738	1882	880	1066	2115	1221	700	2771	2696	2290	2233	1776	3882	955	1360	4079	1242	1064	1045	1802	1215
ENSG00000154640	10950	BTG3	469	631	1408	1419	1201	201	705	1795	735	740	836	648	568	799	437	1154	878	800	866	1129	3192	3435	1856	1755	2067	1911	1561	1695	1350	1942	925	425	899	359	1169	333	1048	1397	1581	446	662	459	1328	980	1086	1026	537
ENSG00000137707	54766	BTG4	0	0	0	2	0	0	0	0	0	0	0	0	0	0	0	0	4	8	4	0	0	0	0	0	0	0	0	0	0	0	0	0	0	0	0	0	1	0	0	0	0	0	0	1	0	0	0
ENSG00000010671	695	BTK	6	2	0	3	1	14	6	10	3	5	2	2	13	8	5	9	6	5	0	5	9	1	1	4	12	8	7	7	10	4	5	13	4	5	3	3	27	2	1	7	5	2	2	2	3	3	2
ENSG00000186265	151888	BTLA	1	8	0	3	5	9	17	0	2	6	3	172	3	0	42	16	16	18	6	1	1	0	2	3	3	4	2	0	1	4	2	1	2	98	30	4	1	1	4	78	21	53	3	1	12	10	24
ENSG00000124557	696	BTN1A1	213	48	136	16	19	53	20	3	5	9	11	7	30	62	50	1	22	17	93	8	2	1	28	21	9	5	7	37	2	1	155	14	7	9	0	16	7	149	140	1	21	17	6	10	9	31	10
ENSG00000112763	11120	BTN2A1	1851	1595	1660	1697	1623	1103	974	1859	1160	1279	1261	1093	1983	1876	1004	1431	3195	2681	2391	1073	1941	2473	2022	2087	1251	987	1943	1690	1517	1138	929	2129	2474	1138	2044	1167	1632	982	1116	935	2705	952	519	603	553	849	1454
ENSG00000124508	10385	BTN2A2	525	765	360	339	390	615	505	637	412	401	511	709	939	520	564	1053	922	627	673	566	1204	946	410	506	697	544	814	1021	393	561	488	695	1042	833	1326	584	564	231	424	707	728	531	221	190	233	427	429
ENSG00000026950	11119	BTN3A1	1393	2174	1174	1554	1347	1320	819	1039	946	919	644	1343	1775	454	503	1040	3309	1274	895	755	1728	2381	746	764	737	873	1180	1481	223	370	1273	588	775	1391	1492	1360	379	458	511	1008	4423	822	349	181	337	1141	742
ENSG00000186470	11118	BTN3A2	1510	1696	1591	1949	1647	1560	1175	1361	960	816	461	866	1948	1172	523	1223	1966	1163	740	944	1767	1796	1445	1247	1055	829	1362	1585	227	368	1823	788	765	1610	1425	2329	686	134	172	1437	3408	1004	415	350	405	1240	994
ENSG00000111801	10384	BTN3A3	199	347	348	718	497	507	513	195	114	143	143	509	818	41	182	339	631	250	230	285	811	671	265	228	189	345	279	418	99	131	292	116	104	372	487	431	117	371	327	427	1323	476	135	124	143	459	156
ENSG00000204290	56244	BTNL2	0	0	0	0	0	0	0	0	0	0	0	0	0	0	0	1	0	0	0	0	0	0	0	0	0	0	0	0	0	0	0	0	0	0	0	0	0	0	0	0	0	0	0	0	0	2	0
ENSG00000168903	10917	BTNL3	863	942	1273	1444	1720	76	0	238	0	2	2	154	216	576	28	297	123	355	3228	188	151	24	11	44	145	127	179	4	8	5	278	25	29	7	41	28	9	41	19	474	147	1	54	57	26	44	21
ENSG00000113303	79908	BTNL8	1127	436	1504	1080	1870	33	4	161	1	1	11	133	779	116	12	154	107	25	928	167	339	71	27	120	139	31	78	13	10	1	771	24	34	14	38	24	4	172	56	168	260	19	244	229	188	310	21
ENSG00000165810	153579	BTNL9	231	688	468	241	371	80	0	27	0	6	49	27	327	53	0	40	1118	415	2217	98	257	144	18	63	225	59	14	163	31	26	607	23	40	11	5	15	17	111	119	58	548	132	351	93	280	263	36
ENSG00000166167	8945	BTRC	1830	1736	1108	839	1139	958	1029	813	1707	1746	940	1197	1149	1108	1098	1101	1566	1003	1273	736	798	552	1954	1612	1023	778	1232	1467	1275	1363	1007	1195	1327	1861	2147	1944	2695	1400	1687	1664	1293	1069	2162	1319	1836	1433	825
ENSG00000169679	699	BUB1	2290	1430	9251	5210	5327	1784	6218	5128	5725	6879	4620	4732	3977	8232	4702	4815	7213	5725	9716	6050	6639	10475	12901	11331	6637	3094	9509	5140	8215	7154	3067	10087	9496	1546	1858	2203	3021	12210	5407	2235	2108	3883	10990	8792	11440	8557	5013
ENSG00000156970	701	BUB1B	1723	886	5650	2749	3221	1037	4399	3566	3331	3511	2535	2741	1996	5282	2136	3756	2143	1815	3994	3316	3206	3255	5107	4006	2078	1315	3476	2441	5133	5167	2021	4234	1986	581	559	633	2025	4059	2906	1564	1206	2202	7536	5345	5751	4397	3624
ENSG00000259288	NA	BUB1B-PAK6	1	0	2	0	0	0	0	0	0	0	0	1	0	0	1	0	2	3	0	0	5	0	4	2	1	4	2	0	2	1	0	5	1	0	1	0	0	2	2	4	1	1	5	2	4	3	1
ENSG00000154473	9184	BUB3	7961	5736	11027	8870	9142	4018	10350	8473	7773	8248	7530	7084	8221	8180	5366	6224	6601	8303	12838	5471	6634	6066	18360	14462	10284	5324	10696	11654	11671	10644	8684	8802	8454	6490	7538	7741	15697	10871	9016	5599	7674	7295	15289	11399	13028	10746	6826
ENSG00000137656	84811	BUD13	1153	1173	1740	1308	1280	790	2112	1632	1514	1597	1436	1322	1140	2083	852	1018	1838	1189	1295	1333	1555	1628	2094	2323	1686	932	2692	918	1568	1416	1297	2067	2035	702	945	552	1021	1272	1224	736	1491	1059	2425	2300	2130	1919	1603
ENSG00000071462	114049	BUD23	9188	7751	6434	4057	5263	5904	4722	7761	3969	4048	5082	5459	4821	5908	6037	3059	6865	4356	7702	3914	4170	3999	8977	9226	4200	2781	5166	4083	7345	6529	5872	7501	7607	7009	3826	5371	3278	7181	6431	4966	4959	3154	10487	10011	8742	7383	4952
ENSG00000106245	8896	BUD31	13864	13570	3687	2733	2750	3737	3673	4980	3360	2984	3342	2287	3380	4657	4114	2034	3521	3080	6369	4650	5316	5741	5086	4979	4515	2676	5083	2980	5054	5916	4029	5162	4241	3159	2574	2744	3002	4355	4128	2792	4118	1902	5220	4206	5071	3952	4212
ENSG00000112276	11149	BVES	2	2	0	0	0	3	0	83	0	0	4	0	31	0	5	9	1	0	0	58	114	194	53	9	0	0	2	0	0	0	0	0	25	0	8	2	1	0	0	9	352	10	0	0	0	0	11
ENSG00000112578	705	BYSL	1583	1743	2478	940	1612	1503	2295	2585	1422	1517	1894	1877	1776	3020	1918	2057	2926	3084	4589	1839	1808	1820	3124	3219	1417	732	3422	2637	3185	2257	1460	2743	2278	1590	1454	1634	2086	1901	1467	1581	1369	1749	1677	1551	1446	993	3223
ENSG00000082153	9689	BZW1	16706	14677	22538	18364	23678	10504	17962	14851	11875	14319	8101	12407	8759	20343	13304	12154	11731	22690	23044	8232	5879	4289	17388	15791	13127	10183	15117	12280	17410	16233	8764	20402	16142	20798	33473	21526	11984	32130	24845	14037	10121	12822	18084	19136	16611	10698	18172
ENSG00000136261	28969	BZW2	12789	15510	10725	5328	8311	11196	8856	13882	10844	10510	9725	11966	9898	15953	10884	8676	10805	10880	18109	21081	26061	26293	16133	15321	11878	6692	13063	13989	13595	12197	10924	13764	11008	6610	5315	5236	6742	12660	9114	9293	8716	4257	21199	15700	20360	13831	14167
ENSG00000164929	79870	BAALC	0	2	0	2	0	0	0	0	0	0	0	1	0	0	0	0	0	0	0	0	2	1	2	0	0	0	0	0	0	0	1	0	0	0	0	0	7	1	0	0	0	0	0	0	0	0	0
ENSG00000136881	570	BAAT	14	8	19	7	8	6	37	12	8	18	1	5	22	62	72	20	9	116	105	28	75	37	8	16	12	13	30	27	65	24	31	88	125	17	22	26	8	16	14	15	25	66	27	6	15	18	10
ENSG00000214688	414152	C10orf105	2	2	0	1	0	0	0	1	0	0	0	0	4	1	0	0	1	0	1	0	0	0	0	0	0	0	1	0	0	0	0	0	0	9	8	9	2	0	0	0	7	2	0	1	0	0	0
ENSG00000183559	399814	C10orf120	0	0	0	0	0	0	0	0	0	0	0	0	0	0	0	0	0	0	0	0	0	0	0	0	0	0	0	0	0	0	0	0	0	0	0	0	0	0	0	0	0	0	0	0	0	0	0
ENSG00000237489	387723	C10orf143	389	532	48	23	41	147	59	85	47	42	111	99	123	31	75	101	45	74	62	652	733	627	94	88	121	52	290	82	168	158	219	131	95	193	138	176	136	115	153	72	30	25	97	112	37	65	201
ENSG00000178645	282966	C10orf53	0	0	1	0	0	0	0	0	0	0	0	1	0	0	0	0	0	0	0	0	0	0	0	0	2	0	0	0	0	0	0	0	0	0	0	0	0	0	0	0	0	0	0	0	0	0	0
ENSG00000203942	414157	C10orf62	2	2	0	0	0	4	5	4	5	11	1	11	9	9	9	4	0	1	0	4	1	0	7	3	1	2	2	7	1	3	0	4	3	3	10	8	4	1	0	8	4	8	2	2	9	8	7
ENSG00000179133	256815	C10orf67	36	31	0	0	0	1	4	0	0	0	0	3	3	0	3	0	1	2	1	2	5	1	0	0	0	0	0	0	0	0	4	1	0	46	20	13	0	0	6	8	1	0	9	1	9	9	0
ENSG00000177354	118461	C10orf71	0	0	0	0	0	0	0	0	0	0	0	0	0	0	0	0	0	0	0	0	0	0	0	0	0	0	0	0	0	0	0	0	0	0	0	0	0	0	0	0	0	0	0	0	0	0	0
ENSG00000119965	80007	C10orf88	409	548	308	277	351	281	458	314	503	503	241	279	381	382	328	378	391	647	928	306	420	322	847	596	493	356	719	668	229	350	415	466	386	674	653	584	637	253	363	358	557	325	847	524	756	666	292
ENSG00000154493	118611	C10orf90	1	12	0	0	0	1	1	0	2	3	3	3	3	0	24	72	1	12	9	0	3	0	5	3	4	0	1	0	2	6	2	0	2	29	12	3	1	0	0	21	3	1	0	2	0	2	0
ENSG00000120055	79946	C10orf95	76	46	118	73	108	42	44	23	59	49	32	19	53	33	73	64	223	77	90	26	36	29	174	85	71	58	51	84	97	69	52	37	32	46	87	52	250	80	83	77	85	103	142	104	89	114	31
ENSG00000176029	56673	C11orf16	1	0	0	1	1	0	12	1	1	0	1	0	1	6	0	0	1	0	0	4	109	28	8	1	1	1	5	1	0	0	0	0	0	0	0	1	6	0	0	1	0	2	0	0	0	0	17
ENSG00000110665	29125	C11orf21	0	0	0	1	0	2	0	9	3	0	5	2	0	3	13	5	0	1	0	0	5	0	0	2	4	4	2	13	1	16	0	2	0	10	3	8	14	0	1	4	1	1	10	10	0	32	8
ENSG00000171067	53838	C11orf24	1298	996	2474	1581	2053	808	1423	1724	830	960	1092	1253	675	2440	564	620	859	1906	2252	1155	1169	918	1788	1634	754	766	2028	716	1790	1722	963	2707	1823	1143	1222	960	1033	2131	1876	1513	1328	737	2976	3715	2076	1303	1240
ENSG00000180878	160298	C11orf42	0	0	0	0	0	0	0	0	0	0	0	0	0	0	0	0	0	0	0	0	0	0	0	0	0	0	0	0	0	0	0	0	0	0	0	0	0	0	0	0	0	0	0	0	0	0	0
ENSG00000149300	91894	C11orf52	9	9	4	3	5	8	6	29	17	13	21	15	12	8	5	13	3	5	1	14	19	31	17	14	13	7	20	28	7	12	17	13	21	2	8	4	5	6	11	20	30	3	24	9	7	15	5
ENSG00000182919	28970	C11orf54	4152	2658	585	1498	1033	2758	2028	1491	2335	2076	1208	2128	1368	1610	1134	1556	1817	1307	1001	1593	4201	3095	1201	1698	2789	2896	2177	2685	824	1523	1954	2070	4405	1352	1618	1165	2112	733	1225	1620	5542	2046	640	387	385	722	2349
ENSG00000110696	10944	C11orf58	10318	9884	6638	5598	6135	7015	7799	10084	6776	7139	7880	11353	5024	12462	12429	7073	4501	7994	9050	7066	7816	6790	8668	9327	7496	5005	5380	6856	5101	4725	5032	11644	11613	6799	9676	5547	9186	6759	7027	7674	5416	6473	4978	4080	3789	3634	12664
ENSG00000166323	160140	C11orf65	66	53	27	24	24	45	29	32	29	22	31	76	50	77	17	24	34	60	19	17	49	26	34	50	58	51	81	38	22	32	56	43	79	38	33	38	58	19	37	24	128	30	58	44	59	66	34
ENSG00000175573	83638	C11orf68	1000	1060	841	662	819	1091	1051	1155	1133	1217	1230	1155	772	1242	608	699	1084	1343	1379	766	1123	1351	1429	1259	1121	740	1418	793	1312	1105	898	1167	1488	802	1000	775	925	797	945	1076	792	1389	746	843	680	942	1199
ENSG00000180425	54494	C11orf71	358	553	322	218	355	536	487	551	439	513	757	869	447	1187	240	332	447	478	325	348	630	279	162	371	861	527	959	399	333	418	769	714	1025	224	436	199	748	368	579	365	524	378	404	497	313	526	713
ENSG00000173715	79703	C11orf80	527	605	568	459	695	348	610	744	445	449	620	627	405	499	415	739	693	1289	1040	615	648	598	626	262	731	727	684	488	930	840	522	679	1308	352	656	423	393	1090	1252	557	543	432	848	638	633	493	231
ENSG00000173237	254439	C11orf86	339	184	687	251	1072	32	41	30	2	1	5	21	55	184	2	19	93	280	187	2	1	0	35	111	8	78	15	7	11	0	4	388	533	5	34	4	12	8	2	15	249	4	7	64	6	17	18
ENSG00000185742	399947	C11orf87	0	0	0	0	0	0	1	0	0	0	0	0	0	0	0	0	0	2	10	0	0	0	0	0	0	0	0	0	0	0	0	0	0	0	0	0	0	0	0	0	0	0	0	0	2	0	0
ENSG00000205177	100131378	C11orf91	7	5	6	6	10	0	4	4	6	5	9	2	5	6	0	1	1	3	0	1	5	5	7	5	5	6	0	0	0	2	4	5	14	2	3	3	0	2	2	2	3	5	1	1	0	2	4
ENSG00000187479	387763	C11orf96	1	0	0	0	0	6	1	0	0	0	2	2	2	1	0	0	0	0	0	5	2	3	2	1	1	0	0	1	1	0	0	5	1	2	1	0	3	1	0	3	1	0	0	2	0	0	0
ENSG00000257057	643037	C11orf97	3	3	0	0	3	2	0	23	3	3	0	1	4	0	0	0	0	0	9	4	4	7	0	0	1	2	17	1	4	0	0	2	1	3	0	1	0	0	0	6	2	2	4	1	0	7	2
ENSG00000278615	102288414	C11orf98	219	134	599	247	507	253	415	532	248	308	502	441	272	602	254	197	285	487	520	331	401	409	626	524	329	165	639	346	349	360	290	497	572	301	167	228	354	426	342	346	201	282	249	241	208	131	417
ENSG00000047621	57102	C12orf4	1139	1154	1515	1097	1320	813	1387	512	937	852	524	932	822	1503	1002	1109	475	1242	1161	1443	1112	852	1260	1075	735	424	793	683	796	916	589	1120	948	1379	1937	1329	833	1364	1417	1430	1028	970	1198	965	990	575	1023
ENSG00000180116	283461	C12orf40	6	0	0	0	0	2	10	0	0	0	0	0	0	3	0	0	0	0	1	0	0	0	0	0	0	0	0	0	0	0	0	0	0	0	0	0	4	0	0	0	0	0	0	0	0	0	0
ENSG00000179088	374470	C12orf42	0	2	4	11	5	11	0	26	12	13	4	10	13	33	4	6	0	1	0	5	16	11	0	0	51	26	15	8	3	22	1	2	23	7	2	0	18	3	1	3	3	0	26	31	35	33	4
ENSG00000157895	64897	C12orf43	799	785	1063	879	930	806	870	684	845	914	533	689	781	1323	701	790	1029	1209	1297	848	793	686	1147	891	892	542	1147	883	853	1074	732	1358	1094	640	829	571	804	1606	1647	749	535	1178	1694	1558	1313	954	1115
ENSG00000165805	160419	C12orf50	1	1	0	0	1	0	0	1	1	1	0	1	0	0	0	1	0	3	0	0	1	0	0	1	0	1	0	1	0	0	1	0	0	2	0	0	3	0	1	4	1	0	4	1	0	0	0
ENSG00000177627	121273	C12orf54	0	1	0	0	0	0	0	0	0	0	1	0	0	0	1	0	0	1	2	0	3	0	0	0	0	0	0	0	0	0	0	0	0	0	0	0	4	0	0	0	0	0	0	0	0	1	3
ENSG00000185306	115749	C12orf56	0	1	1	0	1	167	188	3	231	193	202	429	178	374	4	3	123	184	276	103	125	78	2	27	136	87	102	73	0	2	32	65	0	81	175	49	0	1	0	0	1	0	0	0	0	0	110
ENSG00000111678	113246	C12orf57	853	567	2034	3163	2175	500	1832	647	911	1046	655	591	938	1199	661	1404	2758	1920	1389	1554	3339	3214	996	795	2389	1926	1128	1714	958	1531	1061	663	759	1435	1378	894	1872	2542	2047	701	1887	1342	4613	3240	3262	3368	567
ENSG00000182993	144608	C12orf60	78	79	81	39	43	72	118	48	58	73	35	73	73	124	30	50	51	100	73	56	62	31	87	49	109	83	136	123	45	117	91	56	59	47	28	24	60	74	89	41	74	86	175	113	122	128	69
ENSG00000214700	728858	C12orf71	0	0	0	0	0	0	0	0	0	0	0	0	0	0	0	0	0	0	0	0	0	0	0	0	0	1	0	0	0	0	0	0	0	0	0	0	0	0	0	0	0	0	0	0	0	0	0
ENSG00000235162	387882	C12orf75	2668	1755	5977	10120	5663	3153	2082	5574	2423	3087	2484	2295	4765	6668	1837	2015	1521	1926	5244	3429	4752	5929	5521	2311	5821	6586	7142	2924	3187	4426	2374	5576	5046	2196	2754	1424	6366	7044	5073	2343	6762	4805	7347	6502	5910	4761	4344
ENSG00000174456	400073	C12orf76	498	649	246	335	221	437	275	306	385	335	363	252	533	611	212	335	937	492	508	360	642	470	333	441	698	443	388	598	342	468	567	543	521	342	429	322	828	392	556	359	571	488	497	334	464	664	236
ENSG00000226792	647166	C13orf42	0	0	0	0	0	0	0	0	0	0	0	2	0	0	0	0	0	0	0	1	0	0	1	1	0	0	1	0	0	0	0	2	0	0	0	3	1	0	0	2	7	0	2	1	0	0	0
ENSG00000283199	100507747	C13orf46	1	1	9	7	13	1	4	3	2	7	5	18	5	7	10	10	0	0	2	2	14	6	28	18	1	4	1	0	1	4	0	15	6	7	9	33	15	5	5	14	58	2	21	13	1	5	1
ENSG00000179933	55017	C14orf119	4272	3356	4368	3671	5118	2718	3783	2024	3280	3151	2703	3304	2702	3852	2692	2554	3110	3032	4339	2015	2376	2091	4820	3777	4570	3578	5815	4714	4538	3692	2318	3246	3444	2474	3509	1886	2434	4955	5150	2720	1863	3829	3752	3035	3305	2982	4236
ENSG00000227051	56967	C14orf132	1	0	0	0	0	5	0	0	2	0	0	3	4	8	4	5	37	10	75	0	2	0	6	2	3	0	0	5	1	1	0	0	5	0	3	0	3	106	100	1	0	7	85	785	269	192	9
ENSG00000184601	400258	C14orf180	0	0	1	1	4	0	0	1	0	0	0	2	1	0	0	3	0	0	0	0	0	0	0	0	0	0	0	0	0	0	0	0	0	0	1	0	0	0	0	2	5	0	0	0	0	0	0
ENSG00000179476	122525	C14orf28	391	618	119	254	170	142	227	645	259	310	130	228	232	130	151	159	163	123	112	105	202	235	160	169	496	376	367	323	187	196	265	178	232	131	281	106	197	187	296	110	193	218	252	147	227	300	187
ENSG00000179008	317761	C14orf39	1	3	0	0	0	0	3	0	0	0	0	0	0	0	0	0	0	0	0	0	0	0	0	0	0	0	0	0	2	0	0	0	0	2	2	2	0	1	1	0	0	0	12	7	7	18	0
ENSG00000100802	60686	C14orf93	846	642	590	672	679	736	836	452	1005	979	630	647	790	869	472	454	609	313	385	524	1008	569	933	777	1249	579	803	1114	622	631	1027	475	965	519	620	528	1159	542	661	426	590	973	782	649	915	1211	534
ENSG00000167173	56905	C15orf39	1139	814	1178	791	916	627	1226	864	975	1007	475	309	553	1162	497	707	480	779	658	942	1086	856	830	916	631	322	637	325	576	489	700	975	445	519	508	950	820	720	824	925	1356	1071	1168	911	845	597	953
ENSG00000169609	123207	C15orf40	1109	1488	817	499	696	523	821	563	805	828	626	751	712	1377	461	934	403	492	580	845	1212	1047	488	578	1558	610	1480	784	431	412	996	1203	916	732	824	613	733	619	796	926	1142	1079	1744	1246	1443	1312	848
ENSG00000166920	84419	C15orf48	1422	178	1852	5754	4977	36	123	2525	2279	525	113	141	302	1140	161	1896	495	464	292	651	1427	432	222	1171	4710	4332	4282	1250	600	264	586	302	62	12	0	0	58	529	704	1026	661	48	2058	747	2433	2273	2390
ENSG00000189227	145853	C15orf61	502	536	315	272	284	242	382	435	327	354	371	223	273	448	157	425	414	300	383	304	527	657	672	839	587	280	793	372	213	271	455	632	389	347	358	245	483	276	287	270	582	362	628	432	452	484	429
ENSG00000188277	643338	C15orf62	307	488	74	46	55	90	68	32	688	529	76	249	47	31	24	62	38	293	35	26	46	24	528	108	43	28	14	22	288	264	386	43	30	41	265	181	137	196	358	849	17	151	114	221	99	210	55
ENSG00000166455	123775	C16orf46	26	33	5	2	7	19	11	7	3	4	7	7	10	5	8	9	17	17	11	5	17	3	6	16	12	8	5	12	5	12	9	10	12	16	19	11	9	11	15	11	3	6	7	10	6	8	9
ENSG00000185905	283897	C16orf54	4	2	0	12	12	3	6	21	6	0	10	0	8	39	0	0	0	1	0	0	0	0	1	7	56	19	5	7	0	0	8	3	0	9	2	8	1	1	0	3	2	0	0	0	1	0	4
ENSG00000154102	404550	C16orf74	65	144	156	115	160	309	20	97	172	151	589	456	171	140	159	149	532	648	227	141	124	226	382	280	174	12	145	16	206	303	164	288	663	40	28	88	88	330	393	347	211	78	37	41	56	49	49
ENSG00000166152	123970	C16orf78	0	0	0	0	0	0	0	0	0	0	0	0	0	0	0	0	0	0	0	0	1	0	0	0	0	0	0	0	0	0	0	0	0	0	0	0	0	0	0	0	0	0	0	0	0	0	0
ENSG00000234186	162083	C16orf82	0	0	0	0	0	0	0	0	0	0	0	0	0	0	0	0	0	0	0	0	0	0	0	0	0	0	0	0	0	0	0	0	0	0	0	0	0	0	0	0	0	0	0	0	0	0	0
ENSG00000159761	388284	C16orf86	40	48	5	1	2	80	38	41	58	43	108	59	80	108	8	6	3	3	2	15	62	27	67	87	20	23	29	33	22	59	59	123	118	67	45	44	34	3	6	32	21	121	1	0	1	2	101
ENSG00000155330	388272	C16orf87	735	736	516	427	485	487	455	483	323	391	444	536	699	905	380	479	560	575	570	539	973	604	437	699	594	405	813	624	715	734	417	801	846	475	739	417	817	796	796	385	550	502	332	505	288	448	670
ENSG00000153446	146556	C16orf89	0	0	0	3	0	0	0	3	4	2	7	1	11	2	0	0	0	1	0	0	1	0	0	0	3	0	5	3	0	0	0	0	1	29	0	4	0	6	3	1	3	3	0	0	0	1	50
ENSG00000215131	646174	C16orf90	0	0	0	0	0	0	0	0	0	0	0	0	0	1	0	0	0	0	0	0	0	0	0	0	0	0	0	0	0	0	0	0	0	0	0	0	0	0	0	0	0	0	0	0	0	0	0
ENSG00000167194	146378	C16orf92	0	0	0	0	0	0	0	0	0	0	0	0	0	0	0	0	0	0	1	0	0	0	0	0	0	0	0	0	0	0	0	0	0	0	0	0	0	0	0	0	0	0	0	0	0	0	0
ENSG00000260456	100506581	C16orf95	112	169	139	89	141	147	112	103	94	106	167	128	124	167	49	88	119	69	126	84	222	95	95	114	134	55	201	80	85	83	173	215	150	93	258	111	133	198	171	94	148	26	79	106	69	107	159
ENSG00000205832	342346	C16orf96	7	0	0	1	0	1	0	0	0	0	2	0	1	1	1	2	2	0	1	0	3	0	0	1	1	2	1	1	0	1	2	0	2	0	2	0	5	0	0	4	0	0	0	0	0	0	5
ENSG00000256806	388327	C17orf100	116	74	81	84	73	159	87	65	146	165	103	187	187	106	57	95	126	55	61	63	135	105	106	159	232	67	81	144	259	218	154	153	226	53	78	43	218	79	105	64	127	97	81	85	77	122	55
ENSG00000205710	100130311	C17orf107	113	407	55	33	34	57	33	87	49	24	42	37	78	76	14	36	203	201	204	30	52	45	48	48	43	205	269	153	29	27	42	45	92	29	107	26	27	54	34	65	478	25	35	19	9	27	28
ENSG00000267221	110806298	C17orf113	231	464	94	84	90	260	111	121	679	646	356	424	269	443	130	145	281	112	207	134	207	174	110	211	469	208	131	342	71	129	121	248	178	63	190	65	194	70	96	113	71	397	337	169	242	298	152
ENSG00000262165	119139905	C17orf114	6	12	2	1	1	12	2	5	7	2	18	4	9	6	5	10	23	34	20	11	14	27	3	1	11	3	3	4	3	3	9	1	4	11	13	1	3	4	11	6	3	3	4	2	2	8	8
ENSG00000258315	124944	C17orf49	115	74	63	42	71	68	60	79	70	58	85	61	92	45	26	57	74	56	52	66	176	276	104	71	72	50	111	71	46	39	58	92	106	43	69	28	72	59	75	39	91	55	49	46	48	51	69
ENSG00000270806	146853	C17orf50	2	2	2	1	2	1	0	5	0	3	1	1	9	0	2	3	0	0	0	2	5	1	1	5	9	4	11	10	0	0	1	1	0	1	6	4	0	0	0	4	4	1	0	0	0	0	0
ENSG00000186665	284018	C17orf58	553	617	542	408	523	540	456	1599	408	584	651	383	521	778	306	461	527	768	644	754	922	1279	692	786	1467	580	1601	929	388	497	632	964	852	441	609	334	414	699	680	537	373	374	503	346	419	443	680
ENSG00000214226	339210	C17orf67	212	325	64	46	42	94	9	136	39	78	100	99	155	41	75	55	327	215	246	107	132	181	78	89	174	416	121	173	156	186	211	139	171	55	47	50	134	54	72	82	223	54	110	104	62	132	141
ENSG00000108666	64149	C17orf75	2281	2043	1390	1024	1184	1331	1400	1289	1437	1683	2933	2430	1784	1751	1211	1170	1459	1253	1343	1464	1345	1271	1574	1712	2403	1048	2658	1984	713	756	1866	1929	1129	1109	1416	877	1633	1155	1434	710	974	1009	1042	580	654	601	1547
ENSG00000278505	284099	C17orf78	0	0	4	0	0	0	0	0	5	0	0	0	0	28	0	1	0	0	0	0	0	0	0	1	3	2	0	0	0	0	1	0	0	0	1	0	0	0	0	0	4	0	0	0	0	2	0
ENSG00000141219	55028	C17orf80	715	1361	954	529	716	683	1299	1219	1026	1480	1029	1147	1099	1436	705	830	1125	1422	1697	1047	839	550	1478	1284	1340	721	1676	1400	884	616	1380	1747	1822	1157	1236	951	1018	824	920	1221	829	804	1735	1492	1401	1293	1230
ENSG00000187997	100141515	C17orf99	3	4	2	7	5	0	0	0	1	0	6	2	4	0	0	4	4	5	5	1	7	2	1	4	2	4	2	0	4	3	20	3	2	1	3	5	1	0	4	10	1	7	2	14	4	0	0
ENSG00000141428	83608	C18orf21	618	1087	1032	668	710	606	654	530	877	768	560	663	379	1005	589	605	358	314	508	602	676	833	1111	746	655	363	568	584	449	420	1103	831	674	262	554	231	390	781	832	598	492	447	1213	1003	1021	944	650
ENSG00000177576	497661	C18orf32	455	529	359	324	368	334	235	260	287	243	297	302	158	342	273	155	212	190	192	220	329	310	465	258	394	333	483	356	190	192	630	257	334	243	543	188	254	361	501	312	392	147	2210	2504	1624	2199	264
ENSG00000166845	162681	C18orf54	109	151	506	233	318	168	298	359	213	221	245	183	118	462	239	126	124	175	271	254	179	160	427	270	207	165	290	206	240	291	295	553	385	54	90	50	151	395	309	181	129	117	506	357	355	369	283
ENSG00000206043	644041	C18orf63	0	2	0	0	0	0	0	0	0	0	0	0	0	0	1	0	0	0	0	0	0	0	0	0	0	0	0	0	0	0	0	0	0	0	0	0	0	0	0	0	1	0	0	0	0	0	0
ENSG00000131943	83636	C19orf12	1064	1489	1028	827	1212	1491	862	1109	2171	2058	1174	1268	1366	1769	1164	1168	1274	1047	2404	900	1562	1430	2596	2013	1704	1135	1281	831	918	1134	1137	1572	1588	1460	1868	1864	1259	840	1134	1397	940	1258	1453	924	1307	1428	1598
ENSG00000177025	147685	C19orf18	28	86	0	0	0	16	0	4	25	20	2	6	27	22	13	33	18	8	28	5	5	0	2	9	20	20	11	21	5	21	0	22	19	6	15	14	9	20	16	14	7	19	12	2	7	6	18
ENSG00000119559	148223	C19orf25	1071	1516	2373	856	1626	1473	1778	1393	1771	2144	1369	1172	1219	1620	1248	1679	1723	2965	3843	1423	1006	975	1656	1089	1295	806	1700	975	2852	2528	1445	2076	1388	1385	1222	1256	1193	1796	1741	1314	1018	1368	1387	1282	1238	887	2152
ENSG00000167644	64073	C19orf33	2597	3887	4978	4224	5661	1152	708	1176	4496	3408	836	1417	1362	1630	1286	981	5014	2970	6984	632	1025	1703	5339	1373	1072	1419	962	586	1277	1146	2306	1993	1323	1364	1435	1932	518	3202	2467	2079	1562	1306	3256	3794	2516	2764	221
ENSG00000214212	255809	C19orf38	26	25	5	19	11	11	8	5	4	7	3	2	14	2	6	22	23	22	28	8	32	24	19	12	18	11	7	6	13	23	19	16	7	11	31	5	37	2	1	20	21	9	2	0	6	8	2
ENSG00000105072	84167	C19orf44	184	398	205	120	128	162	320	205	345	353	166	170	273	214	283	377	403	255	516	191	119	132	513	301	351	226	374	529	148	195	261	235	204	224	261	171	191	221	309	221	158	256	228	163	195	164	205
ENSG00000160392	126526	C19orf47	448	516	548	240	394	287	497	374	572	670	363	315	371	542	429	365	415	496	733	313	243	215	1042	745	327	220	464	484	584	564	283	653	398	333	606	413	287	575	427	336	349	362	897	781	698	459	512
ENSG00000104979	28974	C19orf53	3483	4211	2834	1956	2475	2452	4010	2669	4304	4577	1787	1747	2957	4558	2677	2573	2713	1969	4557	1800	2524	2579	4633	3128	3167	1919	3568	2625	2535	2893	2775	4102	2054	2738	2965	2507	2312	3521	3333	2665	1814	2793	2499	2410	2096	1758	3118
ENSG00000188032	646457	C19orf67	2	1	1	3	5	0	1	1	48	26	2	1	10	12	17	19	4	0	0	4	2	10	4	8	9	15	1	10	0	1	7	9	4	2	0	1	1	4	1	3	7	8	1	1	0	0	0
ENSG00000221916	55150	C19orf73	131	139	22	19	33	53	35	45	52	49	63	32	43	49	29	33	42	18	48	28	60	33	60	72	93	47	50	54	47	38	101	95	76	47	86	30	57	50	38	38	34	37	35	35	35	53	76
ENSG00000235034	342918	C19orf81	0	1	0	0	0	8	0	4	0	1	30	57	65	0	1	0	0	0	0	24	38	39	72	131	0	0	0	0	14	28	0	0	0	9	5	14	0	0	0	1	13	0	19	1	6	0	0
ENSG00000262874	147646	C19orf84	0	0	0	0	0	0	0	0	0	0	0	0	1	0	0	0	0	0	0	0	0	1	0	1	0	0	0	0	0	0	0	0	0	1	0	0	0	0	0	0	1	0	1	3	0	0	0
ENSG00000283567	111064650	C19orf85	4	2	0	0	0	0	0	0	1	2	0	0	2	0	0	1	1	0	0	0	0	0	1	0	0	0	0	0	0	0	0	0	0	5	0	2	0	0	0	3	0	0	0	0	0	0	1
ENSG00000197223	10438	C1D	693	630	827	821	751	759	767	779	781	840	629	936	620	1150	741	732	727	852	958	661	941	840	836	1396	778	646	864	582	620	743	432	1418	1024	822	1270	841	882	604	645	898	461	573	796	700	772	716	895
ENSG00000106392	56913	C1GALT1	6819	8412	3311	2501	3087	2905	1744	4176	3518	3422	2335	2371	3600	3400	1973	1774	3226	3315	3345	4779	8604	7610	2254	2152	3508	3862	4350	3442	2982	3033	4257	3294	2417	3673	3355	3591	1796	4937	6067	2171	4173	1394	4971	3178	3669	4488	3642
ENSG00000171155	29071	C1GALT1C1	3448	2178	1449	1363	1492	2104	3993	1396	3278	3347	2430	4069	4099	3310	3342	2541	1478	1517	2508	1634	2376	1581	2221	2843	2816	2216	3172	3268	2689	2092	3091	4181	2862	3879	5097	3663	3353	3419	4184	2816	2520	1904	2300	1928	1603	1959	2947
ENSG00000223658	728819	C1GALT1C1L	0	0	0	0	0	10	17	6	54	85	26	54	36	180	16	65	76	24	108	13	3	7	69	202	69	22	12	65	4	40	14	56	126	6	13	6	6	9	29	106	11	117	51	25	50	45	11
ENSG00000180999	92346	C1orf105	29	52	7	2	10	111	178	2	145	119	12	554	169	210	273	68	19	58	222	7	7	3	37	54	95	41	62	81	69	11	94	37	27	83	86	101	15	4	28	174	9	30	81	48	32	11	79
ENSG00000162817	79762	C1orf115	887	13	511	910	1221	483	501	106	409	568	268	820	1928	1284	139	988	263	34	999	909	1227	745	274	417	952	1052	262	770	748	570	717	2044	2489	262	92	315	129	1039	1759	629	1475	1474	2481	1255	1883	2193	525
ENSG00000182795	79098	C1orf116	3178	3623	2381	2574	3590	762	1127	325	827	1091	468	860	2639	405	655	391	2361	2180	4238	806	1562	729	2659	720	301	424	381	605	710	733	2262	692	692	2410	4089	4225	581	2132	3108	1463	1504	1881	691	1684	438	1137	619
ENSG00000197982	127687	C1orf122	2141	1889	1337	543	1079	1352	2052	1407	578	663	1156	1467	864	1355	984	836	1307	2249	2772	1613	2045	1833	1202	1194	735	805	1742	772	907	1515	1482	1430	1097	1883	1804	1428	1100	1975	2021	2209	1152	993	1290	1470	830	794	1529
ENSG00000175262	148345	C1orf127	4	1	1	0	0	4	6	0	0	0	1	1	7	0	1	1	0	1	0	0	1	0	0	4	0	1	2	1	9	3	2	0	0	2	16	2	6	2	8	3	1	2	16	12	5	6	3
ENSG00000143633	128061	C1orf131	2294	2414	1260	851	1186	907	987	607	1247	1371	807	1388	3469	3090	936	961	1449	687	1570	1434	1531	548	1493	1920	1502	1215	2060	1857	517	324	2398	1115	1483	1261	1056	820	824	1083	1635	805	1233	1303	1464	1640	1093	1253	1387
ENSG00000203963	400757	C1orf141	0	2	4	1	2	1	0	0	0	0	0	0	1	1	0	0	0	0	3	0	2	0	0	0	5	0	1	0	4	2	0	0	4	2	2	0	1	0	2	0	0	0	0	3	0	4	0
ENSG00000203910	388649	C1orf146	0	0	0	0	0	0	0	0	0	0	0	0	0	0	0	0	0	0	0	0	0	0	0	0	0	2	0	0	0	0	0	0	0	0	0	0	0	0	0	0	0	0	0	0	0	0	0
ENSG00000131591	54991	C1orf159	692	650	986	720	899	611	660	904	532	628	553	571	602	823	723	952	920	1588	863	811	869	657	1500	1081	667	496	966	690	1019	1200	482	787	814	709	1012	518	444	993	800	720	817	346	524	594	505	408	905
ENSG00000143110	128346	C1orf162	19	9	4	18	14	22	6	16	19	15	17	10	44	24	14	25	63	13	18	19	53	48	45	24	26	53	25	39	8	31	31	41	52	17	11	19	23	30	10	12	245	17	11	13	10	15	25
ENSG00000215910	284498	C1orf167	2	4	3	20	13	0	0	0	4	1	0	1	2	1	0	7	6	9	5	1	1	2	1	6	4	2	4	3	3	0	1	3	1	1	9	1	4	1	0	19	3	0	0	0	0	5	1
ENSG00000198912	339448	C1orf174	2006	2196	2559	1814	2335	1918	1421	2436	1365	1426	1937	1734	1800	1967	1427	2557	1905	2689	2792	1708	2165	2346	2844	2300	1387	914	1875	1147	2049	2463	1811	2317	1863	1786	2196	1318	1163	2216	1979	2006	2992	1181	1943	1752	1625	1486	2787
ENSG00000204006	284546	C1orf185	0	0	0	0	0	0	0	0	0	0	0	0	0	0	0	0	0	0	0	0	0	0	0	0	0	0	0	0	0	0	0	0	0	0	0	0	0	0	0	0	0	0	1	0	2	0	0
ENSG00000119280	84886	C1orf198	3199	2895	2387	1478	2221	2288	2787	2294	2692	2926	2191	2130	2483	2871	2583	1500	4357	3538	4849	1964	1803	1321	9801	6726	2458	3181	4231	2595	1726	1259	2758	2563	3088	3515	3897	3131	1794	1841	2382	2505	2992	1984	4935	4348	3858	3585	3818
ENSG00000284188	122455338	C1orf202	0	0	1	0	0	1	0	3	0	4	1	0	2	2	0	3	1	1	0	0	1	5	1	1	1	0	0	8	1	0	0	1	0	0	0	1	1	1	0	3	3	2	5	1	1	4	3
ENSG00000116667	81563	C1orf21	7261	3830	2315	4427	3436	1527	266	2159	136	351	1013	680	3065	735	1097	723	3452	1502	6201	3371	8101	5162	1985	3059	967	956	295	147	2101	1749	1967	2294	2027	1346	527	519	707	1438	1846	1809	1641	467	1114	623	896	827	2693
ENSG00000253313	149466	C1orf210	1087	1765	876	772	1236	753	1243	1009	568	529	853	562	819	781	556	842	996	763	917	902	1192	1160	1028	822	880	710	1274	974	672	845	882	808	1032	556	585	570	883	546	770	836	824	844	747	481	578	639	403
ENSG00000142686	127703	C1orf216	154	460	572	137	277	598	365	746	481	556	458	709	259	178	573	621	925	666	1565	763	595	565	552	392	694	468	1030	698	432	617	353	662	598	1120	577	798	88	506	548	1019	253	381	939	682	693	632	560
ENSG00000239887	400793	C1orf226	863	871	461	950	816	303	479	632	806	873	127	288	549	1097	362	393	709	412	1361	638	923	1027	496	413	1137	2920	1036	555	203	208	356	670	349	337	296	392	154	337	318	340	655	310	523	484	495	481	483
ENSG00000282872	110806296	C1orf232	0	1	1	0	0	0	0	0	0	1	0	0	1	0	0	0	1	0	4	0	1	2	0	1	3	0	0	1	0	0	0	0	0	0	0	0	0	0	0	0	0	1	0	1	1	1	0
ENSG00000143793	79169	C1orf35	1132	1351	974	439	664	484	884	899	988	1011	620	581	1174	1053	596	480	1671	1044	1995	782	928	731	2463	1875	1228	988	1449	1292	589	526	1059	1079	957	684	585	541	480	896	861	552	867	608	1627	1446	1393	1229	1032
ENSG00000143612	25912	C1orf43	22119	22260	11689	12287	13125	13641	14723	12524	17094	16575	9528	8324	12965	12527	10451	16366	21680	9679	19358	15606	23129	22407	22447	17928	19825	18504	20512	22620	13309	14740	13277	17038	17992	20155	20298	16143	10467	10833	10674	11810	20939	16967	15738	14519	14111	16212	16325
ENSG00000164008	79078	C1orf50	306	316	181	175	222	210	236	226	173	182	174	211	183	195	146	279	277	338	411	202	342	218	294	214	235	241	313	290	164	300	174	176	234	275	321	277	248	250	302	294	353	360	226	175	136	159	178
ENSG00000162642	148423	C1orf52	1808	1875	715	792	733	728	494	847	799	727	706	659	1018	832	797	876	1320	1120	1514	833	1395	1322	1013	925	866	825	1452	1397	894	1080	1127	1038	994	731	906	556	1038	684	696	755	2180	1154	655	516	606	736	833
ENSG00000203724	388722	C1orf53	81	94	84	33	48	59	103	57	174	166	37	107	26	105	46	18	46	48	231	33	25	19	57	42	39	25	64	39	82	42	19	38	39	121	68	97	37	106	115	92	33	58	291	283	187	173	137
ENSG00000118292	79630	C1orf54	75	50	15	38	29	46	19	22	18	18	7	15	30	22	15	40	27	21	24	16	74	49	24	18	6	4	7	10	17	10	12	21	17	35	101	53	32	15	22	34	54	29	18	10	8	32	12
ENSG00000143443	54964	C1orf56	224	418	109	85	90	140	266	203	220	276	242	255	242	295	238	246	332	164	323	364	506	362	228	270	386	298	340	390	183	174	258	217	240	187	223	109	146	155	300	142	100	198	469	559	342	474	201
ENSG00000162757	148304	C1orf74	172	171	74	76	74	104	116	56	108	156	91	77	124	155	58	74	138	75	145	62	38	42	177	154	135	101	161	160	123	144	132	107	141	119	126	88	65	107	91	65	60	120	156	178	139	164	115
ENSG00000162598	127795	C1orf87	1	11	0	0	0	2	1	0	1	4	0	0	0	0	0	1	0	1	4	0	2	4	0	0	0	3	0	0	0	0	0	0	0	4	20	27	3	3	0	3	2	0	0	1	1	2	0
ENSG00000142698	84970	C1orf94	0	0	0	0	0	0	0	0	0	0	0	0	0	0	0	0	0	0	0	0	0	0	0	0	0	0	0	0	0	0	0	0	0	0	0	0	0	0	0	0	0	0	0	0	0	0	0
ENSG00000173372	712	C1QA	0	0	0	9	0	0	0	0	0	0	0	0	0	0	0	0	0	0	0	0	0	0	0	0	0	0	0	0	0	0	0	0	0	0	0	2	0	0	0	0	0	0	0	0	0	0	0
ENSG00000173369	713	C1QB	0	0	1	14	1	0	0	0	0	0	0	0	0	0	0	0	0	0	0	0	0	0	0	0	0	0	0	0	0	0	0	0	0	0	0	0	0	0	0	0	0	0	0	0	0	0	0
ENSG00000108561	708	C1QBP	13471	8493	24635	15883	22832	10968	10263	14259	9405	9387	15358	12071	8579	20350	12305	12707	12011	11847	20379	15571	13321	20077	15656	15849	10859	6698	14960	9775	13497	8703	8612	21151	16286	10507	5518	7264	13361	19852	13042	10131	14939	5717	13291	11238	9803	6987	18466
ENSG00000159189	714	C1QC	0	0	0	5	0	0	0	0	0	0	0	0	0	0	0	0	0	0	0	0	0	0	0	0	0	0	0	0	0	0	0	0	0	0	0	0	0	0	0	0	0	0	0	0	0	0	0
ENSG00000131094	10882	C1QL1	0	0	10	18	11	0	1	3	7	6	6	0	28	6	3	2	32	5	27	3	1	4	7	13	41	20	3	10	2	1	0	8	1	0	3	0	2	1	1	3	0	6	3	2	8	10	1
ENSG00000144119	165257	C1QL2	0	1	0	0	0	0	0	0	0	0	0	0	0	0	0	0	0	0	0	0	0	0	0	0	0	0	0	0	0	0	0	0	0	0	0	0	0	0	0	0	0	0	0	0	0	0	0
ENSG00000165985	389941	C1QL3	0	0	0	0	1	1	0	0	0	0	0	0	0	1	0	0	0	0	0	0	0	1	0	0	0	0	0	0	0	0	0	2	1	0	0	0	2	1	3	0	1	0	1	0	1	0	0
ENSG00000186897	338761	C1QL4	0	1	3	7	4	2	1	2	6	3	3	0	0	7	3	4	35	9	25	3	9	51	5	8	30	14	7	1	2	3	3	11	2	0	0	1	5	0	1	0	2	1	11	4	20	23	7
ENSG00000173918	114897	C1QTNF1	446	842	230	132	181	766	1633	482	890	1352	805	451	1039	317	576	503	722	373	702	605	409	291	213	372	797	692	758	711	504	166	2514	566	221	569	731	785	573	432	794	598	43	1144	2174	1552	1766	1722	414
ENSG00000184163	388581	C1QTNF12	57	45	84	51	78	20	4	67	15	11	26	8	59	60	18	69	44	56	39	23	138	149	126	101	63	48	69	16	11	41	22	39	58	20	37	17	18	26	8	98	187	8	16	18	7	28	23
ENSG00000145861	114898	C1QTNF2	1	0	5	0	3	0	17	0	3	6	2	2	6	4	18	9	0	3	5	0	2	0	7	1	1	2	2	1	2	7	0	2	0	0	7	7	3	8	11	0	2	3	20	20	1	5	4
ENSG00000082196	114899	C1QTNF3	28	27	14	37	15	28	40	28	89	93	69	184	63	157	111	84	18	25	18	11	22	9	57	46	54	32	31	66	20	37	40	42	47	46	64	43	49	11	37	30	51	51	32	10	17	29	64
ENSG00000273294	NA	C1QTNF3-AMACR	1	5	2	0	2	7	1	0	1	10	8	11	5	3	8	4	0	0	1	0	0	0	1	2	9	8	2	2	0	0	3	0	3	3	5	3	2	5	2	3	5	5	1	1	0	2	6
ENSG00000172247	114900	C1QTNF4	0	0	0	2	1	0	1	0	0	0	0	0	0	0	1	4	2	0	0	0	3	3	1	0	0	1	0	0	0	0	2	0	0	2	0	1	3	0	0	1	7	2	0	0	0	0	0
ENSG00000223953	114902	C1QTNF5	0	0	0	0	0	0	0	0	0	0	0	0	0	0	0	0	1	0	0	0	0	1	0	0	0	1	0	0	0	0	0	1	1	0	0	0	0	0	0	1	0	0	0	0	0	1	2
ENSG00000133466	114904	C1QTNF6	146	247	55	99	70	127	113	88	271	239	246	244	397	277	142	311	935	754	334	153	386	170	109	104	463	442	574	487	75	161	627	155	156	143	266	152	396	119	124	81	197	228	190	164	120	188	304
ENSG00000163145	114905	C1QTNF7	0	0	0	0	0	0	0	0	0	0	0	0	0	0	0	0	0	0	0	0	0	0	0	0	0	0	0	0	0	0	0	0	0	0	0	0	0	0	0	0	0	0	0	0	0	0	0
ENSG00000184471	390664	C1QTNF8	38	11	11	5	9	10	18	4	18	13	3	3	2	3	0	3	18	1	0	2	2	3	0	4	23	16	2	23	22	12	3	1	6	0	0	2	13	3	0	1	25	0	31	22	30	37	6
ENSG00000240654	338872	C1QTNF9	9	2	0	5	2	1	8	1	1	2	7	9	3	3	2	5	3	0	1	6	7	1	9	11	0	2	4	7	5	6	2	5	3	4	5	8	4	2	0	5	13	7	7	0	0	2	3
ENSG00000205863	387911	C1QTNF9B	8	0	0	0	0	0	0	1	0	0	0	1	0	0	0	0	0	0	0	0	0	1	0	1	0	1	0	5	1	3	0	2	1	0	1	4	0	0	0	6	0	0	0	0	0	0	0
ENSG00000159403	715	C1R	4	9	33	75	57	11	34	11	38	45	20	63	139	8	56	250	48	51	44	83	255	332	29	23	76	38	16	30	4	23	31	18	10	14	26	8	19	19	67	9	26	102	218	86	214	363	25
ENSG00000139178	51279	C1RL	878	767	1422	1976	1756	974	2098	395	1952	1691	811	1413	1527	1302	769	1642	578	1245	588	1824	2649	1685	825	767	2586	1659	1568	1663	552	864	537	493	767	1097	1682	698	1279	1484	2765	1467	589	2028	1055	571	622	817	1169
ENSG00000182326	716	C1S	25	17	4	30	22	22	21	10	17	13	11	32	67	37	12	20	27	22	10	334	673	633	9	34	77	103	46	44	9	20	35	30	15	92	34	39	15	6	5	55	76	23	30	20	31	76	19
ENSG00000166278	717	C2	1582	745	12	113	12	160	578	254	309	217	461	1428	1068	132	120	117	38	15	11	97	472	89	34	271	81	29	51	72	111	194	100	182	84	1552	1819	1386	703	14	115	338	240	89	17	9	27	29	259
ENSG00000258713	128653	C20orf141	0	0	0	0	0	0	0	0	0	0	0	0	1	0	0	0	0	1	0	0	0	0	0	0	1	0	0	0	0	0	0	0	0	0	0	0	0	0	0	0	0	0	0	0	0	0	0
ENSG00000149609	128864	C20orf144	20	14	3	4	3	21	16	16	5	18	9	8	15	13	10	4	24	9	12	14	11	27	18	15	5	7	5	14	32	28	10	22	18	1	11	10	10	18	15	5	18	12	18	35	28	25	20
ENSG00000125975	140873	C20orf173	0	0	0	0	0	0	0	0	0	0	0	0	0	0	1	0	0	0	0	0	0	1	0	2	0	0	0	0	0	0	0	0	0	0	1	0	0	0	0	1	2	2	0	0	0	0	0
ENSG00000215595	400831	C20orf202	217	112	2	9	0	15	0	1	21	36	2	39	61	29	11	3	3	4	0	19	60	12	4	59	6	8	1	6	1	0	43	5	3	54	46	25	70	0	0	34	18	10	1	0	6	4	7
ENSG00000198547	284805	C20orf203	5	1	0	0	0	3	12	1	0	1	2	0	12	1	2	16	1	0	0	0	4	1	0	2	2	5	0	5	1	4	10	1	0	9	4	13	24	0	1	1	8	5	0	1	0	0	0
ENSG00000196421	284739	C20orf204	87	71	38	22	23	32	77	93	67	79	63	47	130	98	73	130	73	60	99	53	113	170	136	126	65	34	41	449	102	128	50	119	134	69	168	107	406	63	52	71	136	179	70	51	33	84	118
ENSG00000196476	140680	C20orf96	91	112	151	76	125	155	204	108	253	239	170	172	211	293	351	359	228	277	171	319	330	344	229	228	215	133	160	245	73	79	279	93	91	79	107	63	338	52	79	96	136	41	229	95	142	173	188
ENSG00000222018	101928147	C21orf140	0	0	0	0	0	0	0	0	0	0	0	0	0	0	0	0	0	0	0	0	0	0	0	0	0	0	0	0	0	0	0	0	0	0	0	0	0	0	0	0	0	0	0	0	0	0	0
ENSG00000160298	54058	C21orf58	252	221	434	263	337	143	439	356	358	402	456	380	397	593	299	919	294	197	462	594	486	297	1236	1392	1054	368	492	814	818	891	601	549	646	129	196	183	423	639	457	258	141	272	683	590	552	446	533
ENSG00000205929	56245	C21orf62	0	0	0	0	0	0	0	2	0	0	0	0	0	2	0	0	0	0	0	0	0	0	0	0	1	0	0	0	0	0	0	0	0	0	0	0	0	0	0	0	0	0	0	0	0	0	0
ENSG00000154642	54149	C21orf91	634	634	350	410	391	320	359	1089	274	270	672	697	241	575	728	1450	110	320	276	556	1009	793	201	592	472	309	253	464	447	472	402	319	478	593	609	572	1327	393	641	495	192	335	468	478	403	406	746
ENSG00000169314	150248	C22orf15	1	0	0	0	0	0	0	0	0	0	0	0	2	0	0	0	0	0	0	0	3	2	3	0	1	1	0	0	0	0	0	0	0	0	0	0	0	0	0	0	0	0	0	0	0	0	0
ENSG00000128346	84645	C22orf23	3	15	7	1	0	4	3	0	0	2	11	4	5	7	5	7	4	13	9	8	4	11	12	6	9	1	7	6	3	7	5	13	3	5	2	1	5	1	6	1	7	1	4	2	0	4	9
ENSG00000100249	25770	C22orf31	6	9	0	0	0	2	5	3	4	3	2	0	2	2	2	1	0	0	0	6	5	0	1	1	0	1	0	6	0	9	5	0	0	0	57	4	7	0	9	0	0	2	0	1	1	0	4
ENSG00000242259	128977	C22orf39	1857	2548	702	564	674	987	1946	1085	1561	1443	1448	1143	985	2205	735	1485	1051	962	1210	878	1106	723	1244	1406	1754	1558	2308	2285	1294	1405	2068	1190	1499	1371	1458	1000	1579	538	710	1310	924	1583	1435	1145	1058	1012	1212
ENSG00000205856	150297	C22orf42	0	0	1	0	0	0	0	0	0	0	0	0	1	0	0	0	0	0	0	0	0	0	0	0	0	0	0	1	0	0	0	0	0	0	0	0	5	0	0	0	0	0	0	0	0	0	0
ENSG00000157617	25966	C2CD2	1389	1249	2693	2908	2770	1533	866	1970	2735	2499	2092	1977	825	2330	2340	2192	1786	2453	2170	2905	4516	3477	2956	3773	3658	2671	2715	2910	1916	2657	3182	2390	3326	1611	1080	1491	2434	2087	1892	3368	1687	1020	1770	1329	1375	1117	2516
ENSG00000172375	9854	C2CD2L	1814	1596	832	715	823	654	1214	1015	651	647	760	647	609	668	587	572	974	1195	954	882	1568	2060	1045	1127	965	565	1457	682	971	853	1425	1256	1540	664	937	672	406	691	807	886	3149	958	1394	1225	1051	1150	820
ENSG00000168014	26005	C2CD3	1116	872	1077	666	871	809	1186	1015	893	1075	895	1219	536	1189	796	780	1101	1571	915	771	694	758	1366	1180	711	873	1427	985	1249	1074	712	1114	1181	1069	1406	1258	990	1393	1865	1155	1106	888	2248	1815	1406	1324	1158
ENSG00000198535	145741	C2CD4A	415	287	505	272	264	48	6	312	3	2	172	110	88	30	401	907	92	165	510	929	541	956	9	14	264	239	520	29	1073	68	412	754	55	71	97	40	79	46	109	619	30	2787	459	284	433	247	932
ENSG00000205502	388125	C2CD4B	97	101	223	138	149	5	10	98	6	22	100	188	64	13	28	518	4	12	42	15	57	38	27	25	395	89	258	21	151	56	145	42	24	6	1	1	5	23	20	28	63	90	1	0	2	7	81
ENSG00000183186	126567	C2CD4C	1	0	8	4	7	0	0	0	0	0	3	1	0	1	0	0	2	1	0	2	1	1	1	1	4	2	2	1	1	0	2	0	0	0	2	0	17	0	1	1	2	3	9	2	9	12	0
ENSG00000225556	100191040	C2CD4D	57	25	22	6	15	11	45	8	19	41	10	7	40	5	11	28	14	6	15	40	109	41	69	24	6	4	8	17	12	19	35	21	7	33	12	40	26	37	31	6	8	45	10	19	5	5	32
ENSG00000111731	9847	C2CD5	4838	3998	2647	4612	2857	2998	7740	1995	4205	4097	2198	2510	3349	3568	1980	2821	2862	3221	2701	3777	3923	3913	4518	3903	4810	3014	5017	4312	2845	3354	2635	2962	2971	2412	3339	2003	6325	2965	5074	2462	2971	2990	5409	3378	4112	4097	4471
ENSG00000155754	151254	C2CD6	0	0	0	0	0	2	11	2	2	2	0	1	31	130	69	56	1	4	5	4	3	7	168	111	5	1	1	2	0	0	2	1	0	649	471	164	0	0	0	3	9	5	1	3	0	2	0
ENSG00000273045	150590	C2orf15	568	840	222	179	251	515	298	384	544	508	538	588	457	543	533	608	282	488	352	417	424	260	215	324	671	265	489	443	468	520	534	740	919	558	673	529	504	801	731	505	221	489	509	428	584	507	334
ENSG00000221843	84226	C2orf16	0	1	0	0	0	2	0	5	0	0	0	0	3	0	1	2	1	2	1	0	4	5	0	1	2	11	1	0	0	1	3	1	0	0	1	0	1	0	0	1	37	3	0	0	0	1	0
ENSG00000115998	54980	C2orf42	498	730	415	375	382	455	572	298	695	680	432	581	619	427	532	673	558	902	1034	524	632	501	620	649	479	325	520	503	559	581	392	534	650	673	885	631	415	433	658	630	376	357	745	576	728	564	480
ENSG00000135974	79074	C2orf49	1433	1801	1494	1218	1269	1431	1731	1543	2622	2328	1656	2437	1922	2926	1924	2413	3038	2270	2361	1529	2314	2133	2205	2549	2449	1311	2126	2204	1623	1794	1897	2454	2901	2650	3213	2192	2176	1905	1833	1796	1167	2905	1940	1845	1917	2028	1665
ENSG00000150873	130813	C2orf50	5	1	13	5	7	18	3	7	6	20	27	23	39	9	19	22	26	35	28	53	49	47	13	31	50	9	12	22	9	4	4	57	42	32	39	30	28	2	8	18	20	34	67	40	43	52	16
[truncated: 17,512 more rows]
[truncated: 45 more columns]
