# Supplementary material for: Ex vivo modeling of morphological, molecular and pharmacological tumor heterogeneity of metastatic colorectal cancer
Source: Research Square preprint supplement (doi:10.21203/rs.3.rs-6507406/v1), 2025-05-09
Supplement: Supplementary file 3 [file 681ba6a97e3322c915181c26.xlsx]

## Sheet: Data_Set_3_Proteins_mIHC
PDO_id	Prot_marker	mIHC_stain_no	AB_order	Fluor	mean_express_PDO	area_pixels	Slide
Pt26_t1	KRT20	1	1st	Opal 520	0.020436	749872	3
Pt26_t1	CDX2	1	2nd	Opal 570	0.75855	749872	3
Pt26_t1	KRT7	1	3rd	Opal 620	0.05693	749872	3
Pt26_t1	CDH1	1	4th	Opal 690	5.39606	749872	3
Pt26_t1	KRT20	2	1st	Opal 620	0.408631	624096	3
Pt26_t1	UGT1A	2	2nd	Opal 690	0.141135	624096	3
Pt26_t1	ABCG2	2	3rd	Opal 520	0.32262	624096	3
Pt26_t1	KI67	3	1st	Opal 520	2.20783	568373	3
Pt26_t1	UGT1A	3	2nd	Opal 620	0.0573861	568373	3
Pt26_t1	HSF1	3	3rd	Opal 690	4.01011	568373	3
Pt26_t1	RIPK1	4	1st	Opal 520	0.84554	337979	3
Pt26_t1	RCC2	4	2nd	Opal 570	0.182342	337979	3
Pt26_t1	TP53	4	3rd	Opal 690	2.35853	337979	3
Pt26_t1	CFTR	5	1st	Opal 620	0.459273	707524	3
Pt26_t1	ABCB1	5	2nd	Opal 690	1.48279	707524	3
Pt26_t1	ERBB2	5	3rd	Opal 520	0.0825481	707524	3
Pt26_t2	KRT20	1	1st	Opal 520	0.108045	650652	3
Pt26_t2	CDX2	1	2nd	Opal 570	1.67848	650652	3
Pt26_t2	KRT7	1	3rd	Opal 620	0.105249	650652	3
Pt26_t2	CDH1	1	4th	Opal 690	3.8121	650652	3
Pt26_t2	KRT20	2	1st	Opal 620	0.70978	1018864	3
Pt26_t2	UGT1A	2	2nd	Opal 690	0.44735	1018864	3
Pt26_t2	ABCG2	2	3rd	Opal 520	0.566815	1018864	3
Pt26_t2	KI67	3	1st	Opal 520	4.48988	827962	3
Pt26_t2	UGT1A	3	2nd	Opal 620	0.1565	827962	3
Pt26_t2	HSF1	3	3rd	Opal 690	4.63706	827962	3
Pt26_t2	RIPK1	4	1st	Opal 520	1.761	860152	3
Pt26_t2	RCC2	4	2nd	Opal 570	0.238892	860152	3
Pt26_t2	TP53	4	3rd	Opal 690	4.2214	860152	3
Pt26_t2	CFTR	5	1st	Opal 620	0.640441	858670	3
Pt26_t2	ABCB1	5	2nd	Opal 690	1.7399	858670	3
Pt26_t2	ERBB2	5	3rd	Opal 520	0.094284	858670	3
Pt12_t1	KRT20	1	1st	Opal 520	0.050858	218272	2
Pt12_t1	CDX2	1	2nd	Opal 570	0.371996	218272	2
Pt12_t1	KRT7	1	3rd	Opal 620	0.048266	218272	2
Pt12_t1	CDH1	1	4th	Opal 690	4.3451	218272	2
Pt12_t1	KRT20	2	1st	Opal 620	1.5877	257277	2
Pt12_t1	UGT1A	2	2nd	Opal 690	0.149535	257277	2
Pt12_t1	ABCG2	2	3rd	Opal 520	0.103336	257277	2
Pt12_t1	KI67	3	1st	Opal 520	4.55691	158324	2
Pt12_t1	UGT1A	3	2nd	Opal 620	0.052386	158324	2
Pt12_t1	HSF1	3	3rd	Opal 690	6.68283	158324	2
Pt12_t1	RIPK1	4	1st	Opal 520	1.1683	70620	2
Pt12_t1	RCC2	4	2nd	Opal 570	0.101349	70620	2
Pt12_t1	TP53	4	3rd	Opal 690	0.051215	70620	2
Pt12_t1	CFTR	5	1st	Opal 620	0.551017	214377	2
Pt12_t1	ABCB1	5	2nd	Opal 690	0.715862	214377	2
Pt12_t1	ERBB2	5	3rd	Opal 520	0.0607346	214377	2
Pt12_t3	KRT20	1	1st	Opal 520	0.024534	371124	2
Pt12_t3	CDX2	1	2nd	Opal 570	2.4714	371124	2
Pt12_t3	KRT7	1	3rd	Opal 620	0.046617	371124	2
Pt12_t3	CDH1	1	4th	Opal 690	5.7243	371124	2
Pt12_t3	KRT20	2	1st	Opal 620	1.09312	796036	2
Pt12_t3	UGT1A	2	2nd	Opal 690	0.207925	796036	2
Pt12_t3	ABCG2	2	3rd	Opal 520	0.151824	796036	2
Pt12_t3	KI67	3	1st	Opal 520	3.60372	505333	2
Pt12_t3	UGT1A	3	2nd	Opal 620	0.58706	505333	2
Pt12_t3	HSF1	3	3rd	Opal 690	6.6846	505333	2
Pt12_t3	RIPK1	4	1st	Opal 520	1.50263	492127	2
Pt12_t3	RCC2	4	2nd	Opal 570	1.87153	492127	2
Pt12_t3	TP53	4	3rd	Opal 690	0.034064	492127	2
Pt12_t3	CFTR	5	1st	Opal 620	0.503914	699602	2
Pt12_t3	ABCB1	5	2nd	Opal 690	1.65334	699602	2
Pt12_t3	ERBB2	5	3rd	Opal 520	0.0866277	699602	2
Pt12_t4	KRT20	1	1st	Opal 520	0.004936	83520	2
Pt12_t4	CDX2	1	2nd	Opal 570	0.191542	83520	2
Pt12_t4	KRT7	1	3rd	Opal 620	0.036468	83520	2
Pt12_t4	CDH1	1	4th	Opal 690	2.84464	83520	2
Pt12_t4	KRT20	2	1st	Opal 620	1.06068	108131	2
Pt12_t4	UGT1A	2	2nd	Opal 690	0.132758	108131	2
Pt12_t4	ABCG2	2	3rd	Opal 520	0.112695	108131	2
Pt12_t4	KI67	3	1st	Opal 520	3.61451	90406	2
Pt12_t4	UGT1A	3	2nd	Opal 620	0.0236241	90406	2
Pt12_t4	HSF1	3	3rd	Opal 690	5.08886	90406	2
Pt12_t4	RIPK1	4	1st	Opal 520	0.688838	70056	2
Pt12_t4	RCC2	4	2nd	Opal 570	0.02242	70056	2
Pt12_t4	TP53	4	3rd	Opal 690	0.036701	70056	2
Pt12_t4	CFTR	5	1st	Opal 620	0.566997	99280	2
Pt12_t4	ABCB1	5	2nd	Opal 690	0.74721	99280	2
Pt12_t4	ERBB2	5	3rd	Opal 520	0.0812996	99280	2
Pt8_t1	KRT20	1	1st	Opal 520	0.009491	214836	1
Pt8_t1	CDX2	1	2nd	Opal 570	0.070447	214836	1
Pt8_t1	KRT7	1	3rd	Opal 620	0.012389	214836	1
Pt8_t1	CDH1	1	4th	Opal 690	1.11075	214836	1
Pt8_t1	KRT20	2	1st	Opal 620	0.0530387	621418	1
Pt8_t1	UGT1A	2	2nd	Opal 690	0.036189	621418	1
Pt8_t1	ABCG2	2	3rd	Opal 520	0.325374	621418	1
Pt8_t1	KI67	3	1st	Opal 520	0.0704022	702499	1
Pt8_t1	UGT1A	3	2nd	Opal 620	0.106577	702499	1
Pt8_t1	HSF1	3	3rd	Opal 690	0.0683787	702499	1
Pt8_t1	RIPK1	4	1st	Opal 520	0.13962	1002243	1
Pt8_t1	RCC2	4	2nd	Opal 570	0.339473	1002243	1
Pt8_t1	TP53	4	3rd	Opal 690	0.134669	1002243	1
Pt8_t1	CFTR	5	1st	Opal 620	0.273092	1182406	1
Pt8_t1	ABCB1	5	2nd	Opal 690	0.625117	1182406	1
Pt8_t1	ERBB2	5	3rd	Opal 520	0.166742	1182406	1
Pt77_t1	KRT20	1	1st	Opal 520	0.235092	1106150	7
Pt77_t1	CDX2	1	2nd	Opal 570	1.96684	1106150	7
Pt77_t1	KRT7	1	3rd	Opal 620	0.155431	1106150	7
Pt77_t1	CDH1	1	4th	Opal 690	7.07243	1106150	7
Pt77_t1	KRT20	2	1st	Opal 620	3.70128	1238197	7
Pt77_t1	UGT1A	2	2nd	Opal 690	0.539191	1238197	7
Pt77_t1	ABCG2	2	3rd	Opal 520	0.451869	1238197	7
Pt77_t1	KI67	3	1st	Opal 520	1.5759	1067938	7
Pt77_t1	UGT1A	3	2nd	Opal 620	0.742379	1067938	7
Pt77_t1	HSF1	3	3rd	Opal 690	6.20151	1067938	7
Pt77_t1	RIPK1	4	1st	Opal 520	0.938066	1024029	7
Pt77_t1	RCC2	4	2nd	Opal 570	6.05864	1024029	7
Pt77_t1	TP53	4	3rd	Opal 690	3.28781	1024029	7
Pt77_t1	CFTR	5	1st	Opal 620	0.871789	991255	7
Pt77_t1	ABCB1	5	2nd	Opal 690	2.97887	991255	7
Pt77_t1	ERBB2	5	3rd	Opal 520	0.164433	991255	7
Pt77_t2	KRT20	1	1st	Opal 520	0.425985	968618	7
Pt77_t2	CDX2	1	2nd	Opal 570	4.41663	968618	7
Pt77_t2	KRT7	1	3rd	Opal 620	0.232271	968618	7
Pt77_t2	CDH1	1	4th	Opal 690	5.94822	968618	7
Pt77_t2	KRT20	2	1st	Opal 620	3.21892	2154668	7
Pt77_t2	UGT1A	2	2nd	Opal 690	0.247504	2154668	7
Pt77_t2	ABCG2	2	3rd	Opal 520	0.449943	2154668	7
Pt77_t2	KI67	3	1st	Opal 520	2.97448	1311756	7
Pt77_t2	UGT1A	3	2nd	Opal 620	0.554713	1311756	7
Pt77_t2	HSF1	3	3rd	Opal 690	4.83369	1311756	7
Pt77_t2	RIPK1	4	1st	Opal 520	0.524611	1314608	7
Pt77_t2	RCC2	4	2nd	Opal 570	8.08434	1314608	7
Pt77_t2	TP53	4	3rd	Opal 690	2.72354	1314608	7
Pt77_t2	CFTR	5	1st	Opal 620	0.684995	2087066	7
Pt77_t2	ABCB1	5	2nd	Opal 690	2.68475	2087066	7
Pt77_t2	ERBB2	5	3rd	Opal 520	0.191651	2087066	7
Pt13_t1	KRT20	1	1st	Opal 520	0.011891	949012	2
Pt13_t1	CDX2	1	2nd	Opal 570	0.257979	949012	2
Pt13_t1	KRT7	1	3rd	Opal 620	0.042453	949012	2
Pt13_t1	CDH1	1	4th	Opal 690	4.7569	949012	2
Pt13_t1	KRT20	2	1st	Opal 620	0.412135	805963	2
Pt13_t1	UGT1A	2	2nd	Opal 690	0.130533	805963	2
Pt13_t1	ABCG2	2	3rd	Opal 520	0.100897	805963	2
Pt13_t1	KI67	3	1st	Opal 520	1.57531	592933	2
Pt13_t1	UGT1A	3	2nd	Opal 620	0.0817783	592933	2
Pt13_t1	HSF1	3	3rd	Opal 690	7.38705	592933	2
Pt13_t1	RIPK1	4	1st	Opal 520	1.01588	598456	2
Pt13_t1	RCC2	4	2nd	Opal 570	1.77125	598456	2
Pt13_t1	TP53	4	3rd	Opal 690	2.20879	598456	2
Pt13_t1	CFTR	5	1st	Opal 620	0.51672	644678	2
Pt13_t1	ABCB1	5	2nd	Opal 690	0.182445	644678	2
Pt13_t1	ERBB2	5	3rd	Opal 520	0.138778	644678	2
Pt6_t2	KRT20	1	1st	Opal 520	0.056873	387115	1
Pt6_t2	CDX2	1	2nd	Opal 570	0.462892	387115	1
Pt6_t2	KRT7	1	3rd	Opal 620	0.008424	387115	1
Pt6_t2	CDH1	1	4th	Opal 690	3.43686	387115	1
Pt6_t2	KRT20	2	1st	Opal 620	0.75122	12602	1
Pt6_t2	UGT1A	2	2nd	Opal 690	0.242026	12602	1
Pt6_t2	ABCG2	2	3rd	Opal 520	0.220821	12602	1
Pt6_t2	KI67	3	1st	Opal 520	2.81139	548401	1
Pt6_t2	UGT1A	3	2nd	Opal 620	1.20919	548401	1
Pt6_t2	HSF1	3	3rd	Opal 690	5.84872	548401	1
Pt6_t2	RIPK1	4	1st	Opal 520	1.09043	454912	1
Pt6_t2	RCC2	4	2nd	Opal 570	1.49345	454912	1
Pt6_t2	TP53	4	3rd	Opal 690	0.076043	454912	1
Pt6_t2	CFTR	5	1st	Opal 620	0.701851	244110	1
Pt6_t2	ABCB1	5	2nd	Opal 690	1.26527	244110	1
Pt6_t2	ERBB2	5	3rd	Opal 520	0.138956	244110	1
Pt6.2_t1	KRT20	1	1st	Opal 520	0.17807	577548	1
Pt6.2_t1	CDX2	1	2nd	Opal 570	0.281813	577548	1
Pt6.2_t1	KRT7	1	3rd	Opal 620	0.00364	577548	1
Pt6.2_t1	CDH1	1	4th	Opal 690	4.21708	577548	1
Pt6.2_t1	KRT20	2	1st	Opal 620	4.22789	333266	1
Pt6.2_t1	UGT1A	2	2nd	Opal 690	0.689653	333266	1
Pt6.2_t1	ABCG2	2	3rd	Opal 520	1.39665	333266	1
Pt6.2_t1	KI67	3	1st	Opal 520	0.916787	640008	1
Pt6.2_t1	UGT1A	3	2nd	Opal 620	0.834952	640008	1
Pt6.2_t1	HSF1	3	3rd	Opal 690	4.93815	640008	1
Pt6.2_t1	RIPK1	4	1st	Opal 520	1.29082	544372	1
Pt6.2_t1	RCC2	4	2nd	Opal 570	1.76724	544372	1
Pt6.2_t1	TP53	4	3rd	Opal 690	0.051624	544372	1
Pt6.2_t1	CFTR	5	1st	Opal 620	0.731155	843550	1
Pt6.2_t1	ABCB1	5	2nd	Opal 690	4.57827	843550	1
Pt6.2_t1	ERBB2	5	3rd	Opal 520	0.157647	843550	1
Pt6.2_t2	KRT20	1	1st	Opal 520	0.140582	754604	1
Pt6.2_t2	CDX2	1	2nd	Opal 570	0.587901	754604	1
Pt6.2_t2	KRT7	1	3rd	Opal 620	0.005597	754604	1
Pt6.2_t2	CDH1	1	4th	Opal 690	2.56088	754604	1
Pt6.2_t2	KRT20	2	1st	Opal 620	1.91022	1692613	1
Pt6.2_t2	UGT1A	2	2nd	Opal 690	3.02451	1692613	1
Pt6.2_t2	ABCG2	2	3rd	Opal 520	1.20432	1692613	1
Pt6.2_t2	KI67	3	1st	Opal 520	2.51875	1651240	1
Pt6.2_t2	UGT1A	3	2nd	Opal 620	3.15648	1651240	1
Pt6.2_t2	HSF1	3	3rd	Opal 690	4.77329	1651240	1
Pt6.2_t2	RIPK1	4	1st	Opal 520	2.05822	1324350	1
Pt6.2_t2	RCC2	4	2nd	Opal 570	3.58632	1324350	1
Pt6.2_t2	TP53	4	3rd	Opal 690	0.080244	1324350	1
Pt6.2_t2	CFTR	5	1st	Opal 620	0.930371	1550870	1
Pt6.2_t2	ABCB1	5	2nd	Opal 690	5.27286	1550870	1
Pt6.2_t2	ERBB2	5	3rd	Opal 520	0.16904	1550870	1
Pt6.3_t1	KRT20	1	1st	Opal 520	0.657311	1346648	1
Pt6.3_t1	CDX2	1	2nd	Opal 570	0.955991	1346648	1
Pt6.3_t1	KRT7	1	3rd	Opal 620	0.179839	1346648	1
Pt6.3_t1	CDH1	1	4th	Opal 690	4.63747	1346648	1
Pt6.3_t1	KRT20	2	1st	Opal 620	5.03896	2814390	1
Pt6.3_t1	UGT1A	2	2nd	Opal 690	1.36286	2814390	1
Pt6.3_t1	ABCG2	2	3rd	Opal 520	2.05281	2814390	1
Pt6.3_t1	KI67	3	1st	Opal 520	2.20359	2061622	1
Pt6.3_t1	UGT1A	3	2nd	Opal 620	1.27341	2061622	1
Pt6.3_t1	HSF1	3	3rd	Opal 690	4.08615	2061622	1
Pt6.3_t1	RIPK1	4	1st	Opal 520	3.41437	2007663	1
Pt6.3_t1	RCC2	4	2nd	Opal 570	5.12648	2007663	1
Pt6.3_t1	TP53	4	3rd	Opal 690	0.105341	2007663	1
Pt6.3_t1	CFTR	5	1st	Opal 620	0.808374	3430303	1
Pt6.3_t1	ABCB1	5	2nd	Opal 690	2.09478	3430303	1
Pt6.3_t1	ERBB2	5	3rd	Opal 520	0.235126	3430303	1
Pt6.3_t2	KRT20	1	1st	Opal 520	0.121209	2079420	1
Pt6.3_t2	CDX2	1	2nd	Opal 570	0.723538	2079420	1
Pt6.3_t2	KRT7	1	3rd	Opal 620	0.001163	2079420	1
Pt6.3_t2	CDH1	1	4th	Opal 690	3.40941	2079420	1
Pt6.3_t2	KRT20	2	1st	Opal 620	1.50228	2220850	1
Pt6.3_t2	UGT1A	2	2nd	Opal 690	0.166935	2220850	1
Pt6.3_t2	ABCG2	2	3rd	Opal 520	0.633322	2220850	1
Pt6.3_t2	KI67	3	1st	Opal 520	1.77207	2287985	1
Pt6.3_t2	UGT1A	3	2nd	Opal 620	0.245708	2287985	1
Pt6.3_t2	HSF1	3	3rd	Opal 690	4.06188	2287985	1
Pt6.3_t2	RIPK1	4	1st	Opal 520	1.12122	1960594	1
Pt6.3_t2	RCC2	4	2nd	Opal 570	4.41639	1960594	1
Pt6.3_t2	TP53	4	3rd	Opal 690	0.056941	1960594	1
Pt6.3_t2	CFTR	5	1st	Opal 620	0.522058	2396801	1
Pt6.3_t2	ABCB1	5	2nd	Opal 690	2.46948	2396801	1
Pt6.3_t2	ERBB2	5	3rd	Opal 520	0.0734572	2396801	1
Pt10_t2	KRT20	1	1st	Opal 520	0.020479	469364	2
Pt10_t2	CDX2	1	2nd	Opal 570	0.018713	469364	2
Pt10_t2	KRT7	1	3rd	Opal 620	0.001459	469364	2
Pt10_t2	CDH1	1	4th	Opal 690	0.277734	469364	2
Pt10_t2	KRT20	2	1st	Opal 620	0.154923	940204	2
Pt10_t2	UGT1A	2	2nd	Opal 690	0.0955678	940204	2
Pt10_t2	ABCG2	2	3rd	Opal 520	0.147479	940204	2
Pt10_t2	KI67	3	1st	Opal 520	0.757187	1532880	2
Pt10_t2	UGT1A	3	2nd	Opal 620	0.0305926	1532880	2
Pt10_t2	HSF1	3	3rd	Opal 690	2.91436	1532880	2
Pt10_t2	RIPK1	4	1st	Opal 520	0.062807	835723	2
Pt10_t2	RCC2	4	2nd	Opal 570	0.606611	835723	2
Pt10_t2	TP53	4	3rd	Opal 690	0.040028	835723	2
Pt10_t2	CFTR	5	1st	Opal 620	0.193105	1421841	2
Pt10_t2	ABCB1	5	2nd	Opal 690	0.196042	1421841	2
Pt10_t2	ERBB2	5	3rd	Opal 520	0.140519	1421841	2
Pt10_t3	KRT20	1	1st	Opal 520	0.010065	379912	2
Pt10_t3	CDX2	1	2nd	Opal 570	0.071559	379912	2
Pt10_t3	KRT7	1	3rd	Opal 620	0.015796	379912	2
Pt10_t3	CDH1	1	4th	Opal 690	5.674	379912	2
Pt10_t3	KRT20	2	1st	Opal 620	0.146241	24793	2
Pt10_t3	UGT1A	2	2nd	Opal 690	0.286225	24793	2
Pt10_t3	ABCG2	2	3rd	Opal 520	0.17701	24793	2
Pt10_t3	KI67	3	1st	Opal 520	2.44683	202063	2
Pt10_t3	UGT1A	3	2nd	Opal 620	0.429308	202063	2
Pt10_t3	HSF1	3	3rd	Opal 690	5.92225	202063	2
Pt10_t3	RIPK1	4	1st	Opal 520	1.45233	111456	2
Pt10_t3	RCC2	4	2nd	Opal 570	0.03478	111456	2
Pt10_t3	TP53	4	3rd	Opal 690	0.037696	111456	2
Pt10_t3	CFTR	5	1st	Opal 620	2.22619	222996	2
Pt10_t3	ABCB1	5	2nd	Opal 690	0.616439	222996	2
Pt10_t3	ERBB2	5	3rd	Opal 520	0.142572	222996	2
Pt1_t1	KRT20	1	1st	Opal 520	0.003325	557128	1
Pt1_t1	CDX2	1	2nd	Opal 570	2.54906	557128	1
Pt1_t1	KRT7	1	3rd	Opal 620	0.031413	557128	1
Pt1_t1	CDH1	1	4th	Opal 690	3.95417	557128	1
Pt1_t1	KRT20	2	1st	Opal 620	0.42772	951883	1
Pt1_t1	UGT1A	2	2nd	Opal 690	1.58197	951883	1
Pt1_t1	ABCG2	2	3rd	Opal 520	0.249583	951883	1
Pt1_t1	KI67	3	1st	Opal 520	1.18497	940247	1
Pt1_t1	UGT1A	3	2nd	Opal 620	1.61197	940247	1
Pt1_t1	HSF1	3	3rd	Opal 690	6.17603	940247	1
Pt1_t1	RIPK1	4	1st	Opal 520	1.11486	753728	1
Pt1_t1	RCC2	4	2nd	Opal 570	3.63726	753728	1
Pt1_t1	TP53	4	3rd	Opal 690	3.12581	753728	1
Pt1_t1	CFTR	5	1st	Opal 620	0.886902	820883	1
Pt1_t1	ABCB1	5	2nd	Opal 690	0.562087	820883	1
Pt1_t1	ERBB2	5	3rd	Opal 520	0.160453	820883	1
Pt3_t1	KRT20	1	1st	Opal 520	0.008103	182856	1
Pt3_t1	CDX2	1	2nd	Opal 570	0.011534	182856	1
Pt3_t1	KRT7	1	3rd	Opal 620	0.008811	182856	1
Pt3_t1	CDH1	1	4th	Opal 690	4.04683	182856	1
Pt3_t1	KRT20	2	1st	Opal 620	0.587657	458791	1
Pt3_t1	UGT1A	2	2nd	Opal 690	0.105685	458791	1
Pt3_t1	ABCG2	2	3rd	Opal 520	0.58485	458791	1
Pt3_t1	KI67	3	1st	Opal 520	1.65297	186117	1
Pt3_t1	UGT1A	3	2nd	Opal 620	0.133297	186117	1
Pt3_t1	HSF1	3	3rd	Opal 690	5.31422	186117	1
Pt3_t1	RIPK1	4	1st	Opal 520	0.446713	70500	1
Pt3_t1	RCC2	4	2nd	Opal 570	0.085302	70500	1
Pt3_t1	TP53	4	3rd	Opal 690	0.094051	70500	1
Pt3_t1	CFTR	5	1st	Opal 620	0.664213	143435	1
Pt3_t1	ABCB1	5	2nd	Opal 690	0.193922	143435	1
Pt3_t1	ERBB2	5	3rd	Opal 520	0.116653	143435	1
Pt3_t6	KRT20	1	1st	Opal 520	0.00574	758984	1
Pt3_t6	CDX2	1	2nd	Opal 570	0.000809	758984	1
Pt3_t6	KRT7	1	3rd	Opal 620	0.000738	758984	1
Pt3_t6	CDH1	1	4th	Opal 690	5.07136	758984	1
Pt3_t6	KRT20	2	1st	Opal 620	1.55569	1896352	1
Pt3_t6	UGT1A	2	2nd	Opal 690	0.251262	1896352	1
Pt3_t6	ABCG2	2	3rd	Opal 520	0.38784	1896352	1
Pt3_t6	KI67	3	1st	Opal 520	1.83547	1350509	1
Pt3_t6	UGT1A	3	2nd	Opal 620	0.218585	1350509	1
Pt3_t6	HSF1	3	3rd	Opal 690	4.93145	1350509	1
Pt3_t6	RIPK1	4	1st	Opal 520	0.948904	1440231	1
Pt3_t6	RCC2	4	2nd	Opal 570	2.44673	1440231	1
Pt3_t6	TP53	4	3rd	Opal 690	0.06762	1440231	1
Pt3_t6	CFTR	5	1st	Opal 620	0.701509	1904170	1
Pt3_t6	ABCB1	5	2nd	Opal 690	0.232513	1904170	1
Pt3_t6	ERBB2	5	3rd	Opal 520	0.220149	1904170	1
Pt33_t2	KRT20	1	1st	Opal 520	0.173092	1089019	2
Pt33_t2	CDX2	1	2nd	Opal 570	0.35275	1089019	2
Pt33_t2	KRT7	1	3rd	Opal 620	0.004168	1089019	2
Pt33_t2	CDH1	1	4th	Opal 690	3.48091	1089019	2
Pt33_t2	KRT20	2	1st	Opal 620	1.80427	2188691	2
Pt33_t2	UGT1A	2	2nd	Opal 690	1.0344	2188691	2
Pt33_t2	ABCG2	2	3rd	Opal 520	0.777371	2188691	2
Pt33_t2	KI67	3	1st	Opal 520	1.61825	541135	2
Pt33_t2	UGT1A	3	2nd	Opal 620	0.96052	541135	2
Pt33_t2	HSF1	3	3rd	Opal 690	3.42977	541135	2
Pt33_t2	RIPK1	4	1st	Opal 520	1.11586	705847	2
Pt33_t2	RCC2	4	2nd	Opal 570	4.79252	705847	2
Pt33_t2	TP53	4	3rd	Opal 690	2.54782	705847	2
Pt33_t2	CFTR	5	1st	Opal 620	1.30271	1675978	2
Pt33_t2	ABCB1	5	2nd	Opal 690	0.867525	1675978	2
Pt33_t2	ERBB2	5	3rd	Opal 520	0.257849	1675978	2
Pt7_t1	KRT20	1	1st	Opal 520	NA	NA	1
Pt7_t1	CDX2	1	2nd	Opal 570	NA	NA	1
Pt7_t1	KRT7	1	3rd	Opal 620	NA	NA	1
Pt7_t1	CDH1	1	4th	Opal 690	NA	NA	1
Pt7_t1	KRT20	2	1st	Opal 620	0.435134	441725	1
Pt7_t1	UGT1A	2	2nd	Opal 690	0.224166	441725	1
Pt7_t1	ABCG2	2	3rd	Opal 520	0.298003	441725	1
Pt7_t1	KI67	3	1st	Opal 520	2.70601	67045	1
Pt7_t1	UGT1A	3	2nd	Opal 620	2.54059	67045	1
Pt7_t1	HSF1	3	3rd	Opal 690	2.22112	67045	1
Pt7_t1	RIPK1	4	1st	Opal 520	0.784759	116540	1
Pt7_t1	RCC2	4	2nd	Opal 570	3.01877	116540	1
Pt7_t1	TP53	4	3rd	Opal 690	0.097179	116540	1
Pt7_t1	CFTR	5	1st	Opal 620	1.38523	209547	1
Pt7_t1	ABCB1	5	2nd	Opal 690	0.867707	209547	1
Pt7_t1	ERBB2	5	3rd	Opal 520	0.323494	209547	1
Pt9_t1	KRT20	1	1st	Opal 520	0.055328	408748	2
Pt9_t1	CDX2	1	2nd	Opal 570	0.481566	408748	2
Pt9_t1	KRT7	1	3rd	Opal 620	0.044597	408748	2
Pt9_t1	CDH1	1	4th	Opal 690	3.48006	408748	2
Pt9_t1	KRT20	2	1st	Opal 620	0.626599	282136	2
Pt9_t1	UGT1A	2	2nd	Opal 690	0.410678	282136	2
Pt9_t1	ABCG2	2	3rd	Opal 520	0.299803	282136	2
Pt9_t1	KI67	3	1st	Opal 520	2.96526	375966	2
Pt9_t1	UGT1A	3	2nd	Opal 620	0.435058	375966	2
Pt9_t1	HSF1	3	3rd	Opal 690	7.7042	375966	2
Pt9_t1	RIPK1	4	1st	Opal 520	1.05845	352744	2
Pt9_t1	RCC2	4	2nd	Opal 570	0.255657	352744	2
Pt9_t1	TP53	4	3rd	Opal 690	4.07603	352744	2
Pt9_t1	CFTR	5	1st	Opal 620	0.382982	413127	2
Pt9_t1	ABCB1	5	2nd	Opal 690	0.337015	413127	2
Pt9_t1	ERBB2	5	3rd	Opal 520	0.174711	413127	2
Pt20_t1	KRT20	1	1st	Opal 520	0.012507	610624	2
Pt20_t1	CDX2	1	2nd	Opal 570	1.29745	610624	2
Pt20_t1	KRT7	1	3rd	Opal 620	0.052716	610624	2
Pt20_t1	CDH1	1	4th	Opal 690	3.31723	610624	2
Pt20_t1	KRT20	2	1st	Opal 620	0.973337	926554	2
Pt20_t1	UGT1A	2	2nd	Opal 690	0.125256	926554	2
Pt20_t1	ABCG2	2	3rd	Opal 520	0.264862	926554	2
Pt20_t1	KI67	3	1st	Opal 520	2.564	582350	2
Pt20_t1	UGT1A	3	2nd	Opal 620	0.0917063	582350	2
Pt20_t1	HSF1	3	3rd	Opal 690	5.09127	582350	2
Pt20_t1	RIPK1	4	1st	Opal 520	1.09074	511290	2
Pt20_t1	RCC2	4	2nd	Opal 570	2.48826	511290	2
Pt20_t1	TP53	4	3rd	Opal 690	0.23228	511290	2
Pt20_t1	CFTR	5	1st	Opal 620	0.665473	1117629	2
Pt20_t1	ABCB1	5	2nd	Opal 690	1.45059	1117629	2
Pt20_t1	ERBB2	5	3rd	Opal 520	0.359428	1117629	2
Pt11_t1	KRT20	1	1st	Opal 520	0.09763	1220904	2
Pt11_t1	CDX2	1	2nd	Opal 570	3.27265	1220904	2
Pt11_t1	KRT7	1	3rd	Opal 620	0.162785	1220904	2
Pt11_t1	CDH1	1	4th	Opal 690	2.18735	1220904	2
Pt11_t1	KRT20	2	1st	Opal 620	0.514005	1525105	2
Pt11_t1	UGT1A	2	2nd	Opal 690	1.1042	1525105	2
Pt11_t1	ABCG2	2	3rd	Opal 520	0.180634	1525105	2
Pt11_t1	KI67	3	1st	Opal 520	1.09434	891764	2
Pt11_t1	UGT1A	3	2nd	Opal 620	0.599621	891764	2
Pt11_t1	HSF1	3	3rd	Opal 690	0.506775	891764	2
Pt11_t1	RIPK1	4	1st	Opal 520	0.896186	1082344	2
Pt11_t1	RCC2	4	2nd	Opal 570	1.51344	1082344	2
Pt11_t1	TP53	4	3rd	Opal 690	0.125384	1082344	2
Pt11_t1	CFTR	5	1st	Opal 620	3.84357	1223501	2
Pt11_t1	ABCB1	5	2nd	Opal 690	0.8579	1223501	2
Pt11_t1	ERBB2	5	3rd	Opal 520	0.226703	1223501	2
Pt86_t3	KRT20	1	1st	Opal 520	0.347829	651400	7
Pt86_t3	CDX2	1	2nd	Opal 570	0.563329	651400	7
Pt86_t3	KRT7	1	3rd	Opal 620	0.0179411	651400	7
Pt86_t3	CDH1	1	4th	Opal 690	6.64615	651400	7
Pt86_t3	KRT20	2	1st	Opal 620	4.24402	1267998	7
Pt86_t3	UGT1A	2	2nd	Opal 690	1.53396	1267998	7
Pt86_t3	ABCG2	2	3rd	Opal 520	0.581398	1267998	7
Pt86_t3	KI67	3	1st	Opal 520	1.60385	722356	7
Pt86_t3	UGT1A	3	2nd	Opal 620	0.565649	722356	7
Pt86_t3	HSF1	3	3rd	Opal 690	4.27503	722356	7
Pt86_t3	RIPK1	4	1st	Opal 520	1.42563	552548	7
Pt86_t3	RCC2	4	2nd	Opal 570	1.2023	552548	7
Pt86_t3	TP53	4	3rd	Opal 690	0.0487256	552548	7
Pt86_t3	CFTR	5	1st	Opal 620	0.442733	1097759	7
Pt86_t3	ABCB1	5	2nd	Opal 690	0.312589	1097759	7
Pt86_t3	ERBB2	5	3rd	Opal 520	0.0763726	1097759	7
Pt63_t1	KRT20	1	1st	Opal 520	0.321424	1316828	6
Pt63_t1	CDX2	1	2nd	Opal 570	2.59191	1316828	6
Pt63_t1	KRT7	1	3rd	Opal 620	0.116432	1316828	6
Pt63_t1	CDH1	1	4th	Opal 690	6.12564	1316828	6
Pt63_t1	KRT20	2	1st	Opal 620	1.60565	1426872	6
Pt63_t1	UGT1A	2	2nd	Opal 690	0.450621	1426872	6
Pt63_t1	ABCG2	2	3rd	Opal 520	0.320828	1426872	6
Pt63_t1	KI67	3	1st	Opal 520	2.99936	1027739	6
Pt63_t1	UGT1A	3	2nd	Opal 620	0.536423	1027739	6
Pt63_t1	HSF1	3	3rd	Opal 690	6.27678	1027739	6
Pt63_t1	RIPK1	4	1st	Opal 520	1.24666	996364	6
Pt63_t1	RCC2	4	2nd	Opal 570	3.18779	996364	6
Pt63_t1	TP53	4	3rd	Opal 690	0.103728	996364	6
Pt63_t1	CFTR	5	1st	Opal 620	0.442564	1570630	6
Pt63_t1	ABCB1	5	2nd	Opal 690	2.18489	1570630	6
Pt63_t1	ERBB2	5	3rd	Opal 520	0.0909014	1570630	6
Pt63_t2	KRT20	1	1st	Opal 520	0.158379	430628	6
Pt63_t2	CDX2	1	2nd	Opal 570	4.20505	430628	6
Pt63_t2	KRT7	1	3rd	Opal 620	0.221798	430628	6
Pt63_t2	CDH1	1	4th	Opal 690	6.37458	430628	6
Pt63_t2	KRT20	2	1st	Opal 620	0.673872	805118	6
Pt63_t2	UGT1A	2	2nd	Opal 690	0.163592	805118	6
Pt63_t2	ABCG2	2	3rd	Opal 520	0.12084	805118	6
Pt63_t2	KI67	3	1st	Opal 520	2.63086	852725	6
Pt63_t2	UGT1A	3	2nd	Opal 620	0.344492	852725	6
Pt63_t2	HSF1	3	3rd	Opal 690	6.52992	852725	6
Pt63_t2	RIPK1	4	1st	Opal 520	0.964468	726868	6
Pt63_t2	RCC2	4	2nd	Opal 570	4.07805	726868	6
Pt63_t2	TP53	4	3rd	Opal 690	0.07053	726868	6
Pt63_t2	CFTR	5	1st	Opal 620	0.506389	961626	6
Pt63_t2	ABCB1	5	2nd	Opal 690	4.1118	961626	6
Pt63_t2	ERBB2	5	3rd	Opal 520	0.107893	961626	6
Pt15_t3	KRT20	1	1st	Opal 520	0.050362	181224	2
Pt15_t3	CDX2	1	2nd	Opal 570	0.071956	181224	2
Pt15_t3	KRT7	1	3rd	Opal 620	0.0154	181224	2
Pt15_t3	CDH1	1	4th	Opal 690	1.27739	181224	2
Pt15_t3	KRT20	2	1st	Opal 620	0.116126	430091	2
Pt15_t3	UGT1A	2	2nd	Opal 690	0.117091	430091	2
Pt15_t3	ABCG2	2	3rd	Opal 520	0.206709	430091	2
Pt15_t3	KI67	3	1st	Opal 520	1.13018	254478	2
Pt15_t3	UGT1A	3	2nd	Opal 620	0.0871843	254478	2
Pt15_t3	HSF1	3	3rd	Opal 690	1.03802	254478	2
Pt15_t3	RIPK1	4	1st	Opal 520	0.049017	278448	2
Pt15_t3	RCC2	4	2nd	Opal 570	0.076504	278448	2
Pt15_t3	TP53	4	3rd	Opal 690	0.094876	278448	2
Pt15_t3	CFTR	5	1st	Opal 620	0.113942	400413	2
Pt15_t3	ABCB1	5	2nd	Opal 690	0.252878	400413	2
Pt15_t3	ERBB2	5	3rd	Opal 520	0.0775433	400413	2
Pt30_t1	KRT20	1	1st	Opal 520	0.005634	298173	3
Pt30_t1	CDX2	1	2nd	Opal 570	0.039731	298173	3
Pt30_t1	KRT7	1	3rd	Opal 620	0.000852	298173	3
Pt30_t1	CDH1	1	4th	Opal 690	0.414921	298173	3
Pt30_t1	KRT20	2	1st	Opal 620	0.137652	694616	3
Pt30_t1	UGT1A	2	2nd	Opal 690	0.106666	694616	3
Pt30_t1	ABCG2	2	3rd	Opal 520	0.0865285	694616	3
Pt30_t1	KI67	3	1st	Opal 520	0.0151722	294212	3
Pt30_t1	UGT1A	3	2nd	Opal 620	0.0461392	294212	3
Pt30_t1	HSF1	3	3rd	Opal 690	1.3061	294212	3
Pt30_t1	RIPK1	4	1st	Opal 520	0.006882	443905	3
Pt30_t1	RCC2	4	2nd	Opal 570	0.012114	443905	3
Pt30_t1	TP53	4	3rd	Opal 690	0.124396	443905	3
Pt30_t1	CFTR	5	1st	Opal 620	0.226373	328696	3
Pt30_t1	ABCB1	5	2nd	Opal 690	0.130176	328696	3
Pt30_t1	ERBB2	5	3rd	Opal 520	0.0239682	328696	3
Pt30_t2	KRT20	1	1st	Opal 520	0.113532	1350044	3
Pt30_t2	CDX2	1	2nd	Opal 570	0.209297	1350044	3
Pt30_t2	KRT7	1	3rd	Opal 620	0.003184	1350044	3
Pt30_t2	CDH1	1	4th	Opal 690	2.80243	1350044	3
Pt30_t2	KRT20	2	1st	Opal 620	1.52958	2022633	3
Pt30_t2	UGT1A	2	2nd	Opal 690	1.13288	2022633	3
Pt30_t2	ABCG2	2	3rd	Opal 520	0.605769	2022633	3
Pt30_t2	KI67	3	1st	Opal 520	1.7439	504297	3
Pt30_t2	UGT1A	3	2nd	Opal 620	1.31484	504297	3
Pt30_t2	HSF1	3	3rd	Opal 690	5.18877	504297	3
Pt30_t2	RIPK1	4	1st	Opal 520	0.310606	730720	3
Pt30_t2	RCC2	4	2nd	Opal 570	1.12928	730720	3
Pt30_t2	TP53	4	3rd	Opal 690	0.932091	730720	3
Pt30_t2	CFTR	5	1st	Opal 620	0.444019	1476790	3
Pt30_t2	ABCB1	5	2nd	Opal 690	0.567971	1476790	3
Pt30_t2	ERBB2	5	3rd	Opal 520	0.0759061	1476790	3
Pt17_t1	KRT20	1	1st	Opal 520	0.200947	1981745	2
Pt17_t1	CDX2	1	2nd	Opal 570	3.27646	1981745	2
Pt17_t1	KRT7	1	3rd	Opal 620	0.066758	1981745	2
Pt17_t1	CDH1	1	4th	Opal 690	3.83525	1981745	2
Pt17_t1	KRT20	2	1st	Opal 620	2.35701	2063504	2
Pt17_t1	UGT1A	2	2nd	Opal 690	0.271866	2063504	2
Pt17_t1	ABCG2	2	3rd	Opal 520	0.755987	2063504	2
Pt17_t1	KI67	3	1st	Opal 520	4.00262	1243494	2
Pt17_t1	UGT1A	3	2nd	Opal 620	0.181178	1243494	2
Pt17_t1	HSF1	3	3rd	Opal 690	4.49623	1243494	2
Pt17_t1	RIPK1	4	1st	Opal 520	1.04164	1246474	2
Pt17_t1	RCC2	4	2nd	Opal 570	2.17477	1246474	2
Pt17_t1	TP53	4	3rd	Opal 690	0.063237	1246474	2
Pt17_t1	CFTR	5	1st	Opal 620	0.474462	1735008	2
Pt17_t1	ABCB1	5	2nd	Opal 690	0.437562	1735008	2
Pt17_t1	ERBB2	5	3rd	Opal 520	0.267037	1735008	2
Pt17_t2	KRT20	1	1st	Opal 520	0.002234	931996	2
Pt17_t2	CDX2	1	2nd	Opal 570	0.447989	931996	2
Pt17_t2	KRT7	1	3rd	Opal 620	0.018323	931996	2
Pt17_t2	CDH1	1	4th	Opal 690	2.25659	931996	2
Pt17_t2	KRT20	2	1st	Opal 620	0.337391	1275708	2
Pt17_t2	UGT1A	2	2nd	Opal 690	0.181916	1275708	2
Pt17_t2	ABCG2	2	3rd	Opal 520	0.270389	1275708	2
Pt17_t2	KI67	3	1st	Opal 520	4.47042	1119115	2
Pt17_t2	UGT1A	3	2nd	Opal 620	0.0239516	1119115	2
Pt17_t2	HSF1	3	3rd	Opal 690	4.89908	1119115	2
Pt17_t2	RIPK1	4	1st	Opal 520	1.00236	355318	2
Pt17_t2	RCC2	4	2nd	Opal 570	1.05295	355318	2
Pt17_t2	TP53	4	3rd	Opal 690	0.041653	355318	2
Pt17_t2	CFTR	5	1st	Opal 620	0.531872	1173786	2
Pt17_t2	ABCB1	5	2nd	Opal 690	1.26358	1173786	2
Pt17_t2	ERBB2	5	3rd	Opal 520	0.196545	1173786	2
Pt17_t3	KRT20	1	1st	Opal 520	0.046878	2001388	2
Pt17_t3	CDX2	1	2nd	Opal 570	0.943252	2001388	2
Pt17_t3	KRT7	1	3rd	Opal 620	0.02155	2001388	2
Pt17_t3	CDH1	1	4th	Opal 690	1.75536	2001388	2
Pt17_t3	KRT20	2	1st	Opal 620	0.167232	1774661	2
Pt17_t3	UGT1A	2	2nd	Opal 690	0.157521	1774661	2
Pt17_t3	ABCG2	2	3rd	Opal 520	0.436478	1774661	2
Pt17_t3	KI67	3	1st	Opal 520	2.91699	2464951	2
Pt17_t3	UGT1A	3	2nd	Opal 620	0.100597	2464951	2
Pt17_t3	HSF1	3	3rd	Opal 690	4.65614	2464951	2
Pt17_t3	RIPK1	4	1st	Opal 520	0.600626	1202784	2
Pt17_t3	RCC2	4	2nd	Opal 570	1.22298	1202784	2
Pt17_t3	TP53	4	3rd	Opal 690	0.07213	1202784	2
Pt17_t3	CFTR	5	1st	Opal 620	0.336554	2012573	2
Pt17_t3	ABCB1	5	2nd	Opal 690	0.118514	2012573	2
Pt17_t3	ERBB2	5	3rd	Opal 520	0.110781	2012573	2
Pt18_t1	KRT20	1	1st	Opal 520	0.030425	2391248	2
Pt18_t1	CDX2	1	2nd	Opal 570	1.92968	2391248	2
Pt18_t1	KRT7	1	3rd	Opal 620	0.044303	2391248	2
Pt18_t1	CDH1	1	4th	Opal 690	3.45341	2391248	2
Pt18_t1	KRT20	2	1st	Opal 620	0.587033	2499432	2
Pt18_t1	UGT1A	2	2nd	Opal 690	0.255455	2499432	2
Pt18_t1	ABCG2	2	3rd	Opal 520	0.114063	2499432	2
Pt18_t1	KI67	3	1st	Opal 520	1.43975	2229416	2
Pt18_t1	UGT1A	3	2nd	Opal 620	0.178221	2229416	2
Pt18_t1	HSF1	3	3rd	Opal 690	3.65512	2229416	2
Pt18_t1	RIPK1	4	1st	Opal 520	1.91158	2403407	2
Pt18_t1	RCC2	4	2nd	Opal 570	3.49518	2403407	2
Pt18_t1	TP53	4	3rd	Opal 690	0.127594	2403407	2
Pt18_t1	CFTR	5	1st	Opal 620	0.705383	3100148	2
Pt18_t1	ABCB1	5	2nd	Opal 690	2.46143	3100148	2
Pt18_t1	ERBB2	5	3rd	Opal 520	0.287471	3100148	2
Pt18_t3	KRT20	1	1st	Opal 520	0.036708	654763	2
Pt18_t3	CDX2	1	2nd	Opal 570	0.459393	654763	2
Pt18_t3	KRT7	1	3rd	Opal 620	0.070583	654763	2
Pt18_t3	CDH1	1	4th	Opal 690	3.39661	654763	2
Pt18_t3	KRT20	2	1st	Opal 620	0.246951	768465	2
Pt18_t3	UGT1A	2	2nd	Opal 690	0.175203	768465	2
Pt18_t3	ABCG2	2	3rd	Opal 520	0.107325	768465	2
Pt18_t3	KI67	3	1st	Opal 520	3.72435	528942	2
Pt18_t3	UGT1A	3	2nd	Opal 620	0.393192	528942	2
Pt18_t3	HSF1	3	3rd	Opal 690	4.01181	528942	2
Pt18_t3	RIPK1	4	1st	Opal 520	1.62176	472189	2
Pt18_t3	RCC2	4	2nd	Opal 570	5.3591	472189	2
Pt18_t3	TP53	4	3rd	Opal 690	0.188359	472189	2
Pt18_t3	CFTR	5	1st	Opal 620	0.658021	787224	2
Pt18_t3	ABCB1	5	2nd	Opal 690	1.9919	787224	2
Pt18_t3	ERBB2	5	3rd	Opal 520	0.117486	787224	2
Pt18_t4	KRT20	1	1st	Opal 520	0.051415	1438775	2
Pt18_t4	CDX2	1	2nd	Opal 570	0.516506	1438775	2
Pt18_t4	KRT7	1	3rd	Opal 620	0.059895	1438775	2
Pt18_t4	CDH1	1	4th	Opal 690	2.25534	1438775	2
Pt18_t4	KRT20	2	1st	Opal 620	0.322262	3350299	2
Pt18_t4	UGT1A	2	2nd	Opal 690	0.136915	3350299	2
Pt18_t4	ABCG2	2	3rd	Opal 520	0.102497	3350299	2
Pt18_t4	KI67	3	1st	Opal 520	2.41756	1262469	2
Pt18_t4	UGT1A	3	2nd	Opal 620	0.204839	1262469	2
Pt18_t4	HSF1	3	3rd	Opal 690	2.80728	1262469	2
Pt18_t4	RIPK1	4	1st	Opal 520	0.892087	1170144	2
Pt18_t4	RCC2	4	2nd	Opal 570	3.44059	1170144	2
Pt18_t4	TP53	4	3rd	Opal 690	0.308659	1170144	2
Pt18_t4	CFTR	5	1st	Opal 620	0.538109	2573376	2
Pt18_t4	ABCB1	5	2nd	Opal 690	3.04498	2573376	2
Pt18_t4	ERBB2	5	3rd	Opal 520	0.118708	2573376	2
Pt25_t1	KRT20	1	1st	Opal 520	0.013516	365972	3
Pt25_t1	CDX2	1	2nd	Opal 570	0.562908	365972	3
Pt25_t1	KRT7	1	3rd	Opal 620	0.040101	365972	3
Pt25_t1	CDH1	1	4th	Opal 690	3.73461	365972	3
Pt25_t1	KRT20	2	1st	Opal 620	0.254255	638424	3
Pt25_t1	UGT1A	2	2nd	Opal 690	0.148883	638424	3
Pt25_t1	ABCG2	2	3rd	Opal 520	0.0658091	638424	3
Pt25_t1	KI67	3	1st	Opal 520	2.38666	444369	3
Pt25_t1	UGT1A	3	2nd	Opal 620	0.186232	444369	3
Pt25_t1	HSF1	3	3rd	Opal 690	5.10992	444369	3
Pt25_t1	RIPK1	4	1st	Opal 520	1.29467	400745	3
Pt25_t1	RCC2	4	2nd	Opal 570	0.851245	400745	3
Pt25_t1	TP53	4	3rd	Opal 690	0.031648	400745	3
Pt25_t1	CFTR	5	1st	Opal 620	0.492297	462588	3
Pt25_t1	ABCB1	5	2nd	Opal 690	2.58564	462588	3
Pt25_t1	ERBB2	5	3rd	Opal 520	0.0375161	462588	3
Pt21_t1	KRT20	1	1st	Opal 520	0.366006	577532	2
Pt21_t1	CDX2	1	2nd	Opal 570	1.49618	577532	2
Pt21_t1	KRT7	1	3rd	Opal 620	0.037757	577532	2
Pt21_t1	CDH1	1	4th	Opal 690	4.20144	577532	2
Pt21_t1	KRT20	2	1st	Opal 620	3.50194	936520	2
Pt21_t1	UGT1A	2	2nd	Opal 690	0.254543	936520	2
Pt21_t1	ABCG2	2	3rd	Opal 520	2.34614	936520	2
Pt21_t1	KI67	3	1st	Opal 520	2.45312	555835	2
Pt21_t1	UGT1A	3	2nd	Opal 620	0.194991	555835	2
Pt21_t1	HSF1	3	3rd	Opal 690	2.62182	555835	2
Pt21_t1	RIPK1	4	1st	Opal 520	1.42203	595540	2
Pt21_t1	RCC2	4	2nd	Opal 570	1.72314	595540	2
Pt21_t1	TP53	4	3rd	Opal 690	0.069553	595540	2
Pt21_t1	CFTR	5	1st	Opal 620	0.813353	772940	2
Pt21_t1	ABCB1	5	2nd	Opal 690	1.528	772940	2
Pt21_t1	ERBB2	5	3rd	Opal 520	0.204249	772940	2
Pt22.2_t1	KRT20	1	1st	Opal 520	0.136021	418740	2
Pt22.2_t1	CDX2	1	2nd	Opal 570	1.05255	418740	2
Pt22.2_t1	KRT7	1	3rd	Opal 620	0.05154	418740	2
Pt22.2_t1	CDH1	1	4th	Opal 690	4.58792	418740	2
Pt22.2_t1	KRT20	2	1st	Opal 620	1.03261	300259	2
Pt22.2_t1	UGT1A	2	2nd	Opal 690	0.459624	300259	2
Pt22.2_t1	ABCG2	2	3rd	Opal 520	0.29394	300259	2
Pt22.2_t1	KI67	3	1st	Opal 520	1.20088	418708	2
Pt22.2_t1	UGT1A	3	2nd	Opal 620	0.652862	418708	2
Pt22.2_t1	HSF1	3	3rd	Opal 690	1.8491	418708	2
Pt22.2_t1	RIPK1	4	1st	Opal 520	1.06176	225057	2
Pt22.2_t1	RCC2	4	2nd	Opal 570	2.70608	225057	2
Pt22.2_t1	TP53	4	3rd	Opal 690	0.31285	225057	2
Pt22.2_t1	CFTR	5	1st	Opal 620	2.48238	472026	2
Pt22.2_t1	ABCB1	5	2nd	Opal 690	1.51217	472026	2
Pt22.2_t1	ERBB2	5	3rd	Opal 520	0.333613	472026	2
Pt23_t1	KRT20	1	1st	Opal 520	0.001978	707168	3
Pt23_t1	CDX2	1	2nd	Opal 570	1.0383	707168	3
Pt23_t1	KRT7	1	3rd	Opal 620	0.056405	707168	3
Pt23_t1	CDH1	1	4th	Opal 690	2.96101	707168	3
Pt23_t1	KRT20	2	1st	Opal 620	0.104532	627200	3
Pt23_t1	UGT1A	2	2nd	Opal 690	0.0944202	627200	3
Pt23_t1	ABCG2	2	3rd	Opal 520	0.0795122	627200	3
Pt23_t1	KI67	3	1st	Opal 520	2.94259	600597	3
Pt23_t1	UGT1A	3	2nd	Opal 620	0.010272	600597	3
Pt23_t1	HSF1	3	3rd	Opal 690	7.5362	600597	3
Pt23_t1	RIPK1	4	1st	Opal 520	0.384377	544956	3
Pt23_t1	RCC2	4	2nd	Opal 570	0.063797	544956	3
Pt23_t1	TP53	4	3rd	Opal 690	1.16516	544956	3
Pt23_t1	CFTR	5	1st	Opal 620	0.301361	675898	3
Pt23_t1	ABCB1	5	2nd	Opal 690	0.620298	675898	3
Pt23_t1	ERBB2	5	3rd	Opal 520	0.0396653	675898	3
Pt23_t2	KRT20	1	1st	Opal 520	0.006718	852240	3
Pt23_t2	CDX2	1	2nd	Opal 570	1.78704	852240	3
Pt23_t2	KRT7	1	3rd	Opal 620	0.068963	852240	3
Pt23_t2	CDH1	1	4th	Opal 690	3.23444	852240	3
Pt23_t2	KRT20	2	1st	Opal 620	0.189674	1213114	3
Pt23_t2	UGT1A	2	2nd	Opal 690	0.112176	1213114	3
Pt23_t2	ABCG2	2	3rd	Opal 520	0.110068	1213114	3
Pt23_t2	KI67	3	1st	Opal 520	2.48564	982791	3
Pt23_t2	UGT1A	3	2nd	Opal 620	0.287947	982791	3
Pt23_t2	HSF1	3	3rd	Opal 690	7.64279	982791	3
Pt23_t2	RIPK1	4	1st	Opal 520	0.569365	1026100	3
Pt23_t2	RCC2	4	2nd	Opal 570	1.71008	1026100	3
Pt23_t2	TP53	4	3rd	Opal 690	2.75598	1026100	3
Pt23_t2	CFTR	5	1st	Opal 620	0.377942	1161457	3
Pt23_t2	ABCB1	5	2nd	Opal 690	1.67806	1161457	3
Pt23_t2	ERBB2	5	3rd	Opal 520	0.0551437	1161457	3
Pt23_t3	KRT20	1	1st	Opal 520	0.113692	832256	3
Pt23_t3	CDX2	1	2nd	Opal 570	2.13364	832256	3
Pt23_t3	KRT7	1	3rd	Opal 620	0.110369	832256	3
Pt23_t3	CDH1	1	4th	Opal 690	4.93535	832256	3
Pt23_t3	KRT20	2	1st	Opal 620	0.889145	670937	3
Pt23_t3	UGT1A	2	2nd	Opal 690	0.137653	670937	3
Pt23_t3	ABCG2	2	3rd	Opal 520	0.359097	670937	3
Pt23_t3	KI67	3	1st	Opal 520	2.94226	777215	3
Pt23_t3	UGT1A	3	2nd	Opal 620	0.257412	777215	3
Pt23_t3	HSF1	3	3rd	Opal 690	5.40054	777215	3
Pt23_t3	RIPK1	4	1st	Opal 520	0.858037	509184	3
Pt23_t3	RCC2	4	2nd	Opal 570	0.72357	509184	3
Pt23_t3	TP53	4	3rd	Opal 690	1.86271	509184	3
Pt23_t3	CFTR	5	1st	Opal 620	0.777255	1054526	3
Pt23_t3	ABCB1	5	2nd	Opal 690	1.42187	1054526	3
Pt23_t3	ERBB2	5	3rd	Opal 520	0.0841128	1054526	3
Pt23_t4	KRT20	1	1st	Opal 520	0.081398	623868	3
Pt23_t4	CDX2	1	2nd	Opal 570	1.13782	623868	3
Pt23_t4	KRT7	1	3rd	Opal 620	0.14196	623868	3
Pt23_t4	CDH1	1	4th	Opal 690	3.9921	623868	3
Pt23_t4	KRT20	2	1st	Opal 620	0.288639	627838	3
Pt23_t4	UGT1A	2	2nd	Opal 690	0.081512	627838	3
Pt23_t4	ABCG2	2	3rd	Opal 520	0.154253	627838	3
Pt23_t4	KI67	3	1st	Opal 520	3.35853	714469	3
Pt23_t4	UGT1A	3	2nd	Opal 620	0.0273247	714469	3
Pt23_t4	HSF1	3	3rd	Opal 690	4.82194	714469	3
Pt23_t4	RIPK1	4	1st	Opal 520	0.713154	392188	3
Pt23_t4	RCC2	4	2nd	Opal 570	0.83068	392188	3
Pt23_t4	TP53	4	3rd	Opal 690	2.62574	392188	3
Pt23_t4	CFTR	5	1st	Opal 620	0.626809	623690	3
Pt23_t4	ABCB1	5	2nd	Opal 690	2.57726	623690	3
Pt23_t4	ERBB2	5	3rd	Opal 520	0.0853479	623690	3
Pt23_t5	KRT20	1	1st	Opal 520	0.029268	1443168	3
Pt23_t5	CDX2	1	2nd	Opal 570	2.28508	1443168	3
Pt23_t5	KRT7	1	3rd	Opal 620	0.087244	1443168	3
Pt23_t5	CDH1	1	4th	Opal 690	5.45403	1443168	3
Pt23_t5	KRT20	2	1st	Opal 620	0.103727	2558131	3
Pt23_t5	UGT1A	2	2nd	Opal 690	0.149424	2558131	3
Pt23_t5	ABCG2	2	3rd	Opal 520	0.110906	2558131	3
Pt23_t5	KI67	3	1st	Opal 520	4.20773	1717711	3
Pt23_t5	UGT1A	3	2nd	Opal 620	0.468462	1717711	3
Pt23_t5	HSF1	3	3rd	Opal 690	2.4097	1717711	3
Pt23_t5	RIPK1	4	1st	Opal 520	0.796543	1845053	3
Pt23_t5	RCC2	4	2nd	Opal 570	1.6011	1845053	3
Pt23_t5	TP53	4	3rd	Opal 690	2.69524	1845053	3
Pt23_t5	CFTR	5	1st	Opal 620	0.360231	2116592	3
Pt23_t5	ABCB1	5	2nd	Opal 690	0.801863	2116592	3
Pt23_t5	ERBB2	5	3rd	Opal 520	0.0324446	2116592	3
Pt29_t1	KRT20	1	1st	Opal 520	0.019585	1621283	3
Pt29_t1	CDX2	1	2nd	Opal 570	3.59046	1621283	3
Pt29_t1	KRT7	1	3rd	Opal 620	0.134043	1621283	3
Pt29_t1	CDH1	1	4th	Opal 690	3.79783	1621283	3
Pt29_t1	KRT20	2	1st	Opal 620	0.380883	2335863	3
Pt29_t1	UGT1A	2	2nd	Opal 690	0.27689	2335863	3
Pt29_t1	ABCG2	2	3rd	Opal 520	0.312943	2335863	3
Pt29_t1	KI67	3	1st	Opal 520	2.25478	1942975	3
Pt29_t1	UGT1A	3	2nd	Opal 620	0.357944	1942975	3
Pt29_t1	HSF1	3	3rd	Opal 690	0.756187	1942975	3
Pt29_t1	RIPK1	4	1st	Opal 520	0.917981	1884660	3
Pt29_t1	RCC2	4	2nd	Opal 570	1.76258	1884660	3
Pt29_t1	TP53	4	3rd	Opal 690	0.131053	1884660	3
Pt29_t1	CFTR	5	1st	Opal 620	1.21308	2145250	3
Pt29_t1	ABCB1	5	2nd	Opal 690	0.364932	2145250	3
Pt29_t1	ERBB2	5	3rd	Opal 520	0.0870464	2145250	3
Pt29_t2	KRT20	1	1st	Opal 520	0.032857	598600	3
Pt29_t2	CDX2	1	2nd	Opal 570	0.537031	598600	3
Pt29_t2	KRT7	1	3rd	Opal 620	0.046799	598600	3
Pt29_t2	CDH1	1	4th	Opal 690	3.52198	598600	3
Pt29_t2	KRT20	2	1st	Opal 620	0.389043	1127319	3
Pt29_t2	UGT1A	2	2nd	Opal 690	0.224448	1127319	3
Pt29_t2	ABCG2	2	3rd	Opal 520	0.111923	1127319	3
Pt29_t2	KI67	3	1st	Opal 520	2.75785	598543	3
Pt29_t2	UGT1A	3	2nd	Opal 620	0.302769	598543	3
Pt29_t2	HSF1	3	3rd	Opal 690	4.50417	598543	3
Pt29_t2	RIPK1	4	1st	Opal 520	1.5346	499839	3
Pt29_t2	RCC2	4	2nd	Opal 570	4.7419	499839	3
Pt29_t2	TP53	4	3rd	Opal 690	0.091762	499839	3
Pt29_t2	CFTR	5	1st	Opal 620	0.541887	1245906	3
Pt29_t2	ABCB1	5	2nd	Opal 690	1.93227	1245906	3
Pt29_t2	ERBB2	5	3rd	Opal 520	0.076007	1245906	3
Pt29_t3	KRT20	1	1st	Opal 520	0.001265	552144	3
Pt29_t3	CDX2	1	2nd	Opal 570	1.65227	552144	3
Pt29_t3	KRT7	1	3rd	Opal 620	0.050543	552144	3
Pt29_t3	CDH1	1	4th	Opal 690	5.35407	552144	3
Pt29_t3	KRT20	2	1st	Opal 620	0.213376	715517	3
Pt29_t3	UGT1A	2	2nd	Opal 690	0.116899	715517	3
Pt29_t3	ABCG2	2	3rd	Opal 520	0.0409646	715517	3
Pt29_t3	KI67	3	1st	Opal 520	4.1021	739485	3
Pt29_t3	UGT1A	3	2nd	Opal 620	0.239914	739485	3
Pt29_t3	HSF1	3	3rd	Opal 690	0.634672	739485	3
Pt29_t3	RIPK1	4	1st	Opal 520	1.58784	594527	3
Pt29_t3	RCC2	4	2nd	Opal 570	2.00647	594527	3
Pt29_t3	TP53	4	3rd	Opal 690	0.057547	594527	3
Pt29_t3	CFTR	5	1st	Opal 620	0.684605	805041	3
Pt29_t3	ABCB1	5	2nd	Opal 690	1.52594	805041	3
Pt29_t3	ERBB2	5	3rd	Opal 520	0.0506263	805041	3
Pt28_t2	KRT20	1	1st	Opal 520	0.002356	114400	3
Pt28_t2	CDX2	1	2nd	Opal 570	0.445891	114400	3
Pt28_t2	KRT7	1	3rd	Opal 620	0.014313	114400	3
Pt28_t2	CDH1	1	4th	Opal 690	2.3374	114400	3
Pt28_t2	KRT20	2	1st	Opal 620	0.0682432	755273	3
Pt28_t2	UGT1A	2	2nd	Opal 690	0.0574027	755273	3
Pt28_t2	ABCG2	2	3rd	Opal 520	0.159294	755273	3
Pt28_t2	KI67	3	1st	Opal 520	0.659112	327675	3
Pt28_t2	UGT1A	3	2nd	Opal 620	0.0257952	327675	3
Pt28_t2	HSF1	3	3rd	Opal 690	4.36018	327675	3
Pt28_t2	RIPK1	4	1st	Opal 520	0.008186	471825	3
Pt28_t2	RCC2	4	2nd	Opal 570	0.114266	471825	3
Pt28_t2	TP53	4	3rd	Opal 690	0.171314	471825	3
Pt28_t2	CFTR	5	1st	Opal 620	0.102417	337081	3
Pt28_t2	ABCB1	5	2nd	Opal 690	0.140271	337081	3
Pt28_t2	ERBB2	5	3rd	Opal 520	0.0397356	337081	3
Pt28_t4	KRT20	1	1st	Opal 520	0.001927	1505160	3
Pt28_t4	CDX2	1	2nd	Opal 570	3.56004	1505160	3
Pt28_t4	KRT7	1	3rd	Opal 620	0.143156	1505160	3
Pt28_t4	CDH1	1	4th	Opal 690	5.63826	1505160	3
Pt28_t4	KRT20	2	1st	Opal 620	0.107177	2123652	3
Pt28_t4	UGT1A	2	2nd	Opal 690	0.0905777	2123652	3
Pt28_t4	ABCG2	2	3rd	Opal 520	0.075768	2123652	3
Pt28_t4	KI67	3	1st	Opal 520	2.13386	1404016	3
Pt28_t4	UGT1A	3	2nd	Opal 620	0.156231	1404016	3
Pt28_t4	HSF1	3	3rd	Opal 690	0.484101	1404016	3
Pt28_t4	RIPK1	4	1st	Opal 520	0.492508	1119408	3
Pt28_t4	RCC2	4	2nd	Opal 570	2.73039	1119408	3
Pt28_t4	TP53	4	3rd	Opal 690	0.274378	1119408	3
Pt28_t4	CFTR	5	1st	Opal 620	1.34785	1650175	3
Pt28_t4	ABCB1	5	2nd	Opal 690	0.292816	1650175	3
Pt28_t4	ERBB2	5	3rd	Opal 520	0.0474724	1650175	3
Pt24_t1	KRT20	1	1st	Opal 520	0.016735	484812	3
Pt24_t1	CDX2	1	2nd	Opal 570	0.789432	484812	3
Pt24_t1	KRT7	1	3rd	Opal 620	0.022966	484812	3
Pt24_t1	CDH1	1	4th	Opal 690	4.37605	484812	3
Pt24_t1	KRT20	2	1st	Opal 620	0.340097	919352	3
Pt24_t1	UGT1A	2	2nd	Opal 690	0.120845	919352	3
Pt24_t1	ABCG2	2	3rd	Opal 520	0.0944635	919352	3
Pt24_t1	KI67	3	1st	Opal 520	2.47608	612293	3
Pt24_t1	UGT1A	3	2nd	Opal 620	0.0909566	612293	3
Pt24_t1	HSF1	3	3rd	Opal 690	0.437559	612293	3
Pt24_t1	RIPK1	4	1st	Opal 520	0.34258	528783	3
Pt24_t1	RCC2	4	2nd	Opal 570	1.33909	528783	3
Pt24_t1	TP53	4	3rd	Opal 690	0.188393	528783	3
Pt24_t1	CFTR	5	1st	Opal 620	0.775855	915349	3
Pt24_t1	ABCB1	5	2nd	Opal 690	1.27134	915349	3
Pt24_t1	ERBB2	5	3rd	Opal 520	0.0606055	915349	3
Pt24_t2	KRT20	1	1st	Opal 520	0.027759	1622930	3
Pt24_t2	CDX2	1	2nd	Opal 570	2.42363	1622930	3
Pt24_t2	KRT7	1	3rd	Opal 620	0.113765	1622930	3
Pt24_t2	CDH1	1	4th	Opal 690	5.3647	1622930	3
Pt24_t2	KRT20	2	1st	Opal 620	0.0992003	2150956	3
Pt24_t2	UGT1A	2	2nd	Opal 690	0.0878264	2150956	3
Pt24_t2	ABCG2	2	3rd	Opal 520	0.101133	2150956	3
Pt24_t2	KI67	3	1st	Opal 520	3.77635	1652585	3
Pt24_t2	UGT1A	3	2nd	Opal 620	0.422743	1652585	3
Pt24_t2	HSF1	3	3rd	Opal 690	1.25654	1652585	3
Pt24_t2	RIPK1	4	1st	Opal 520	0.402991	1551930	3
Pt24_t2	RCC2	4	2nd	Opal 570	2.59147	1551930	3
Pt24_t2	TP53	4	3rd	Opal 690	1.07345	1551930	3
Pt24_t2	CFTR	5	1st	Opal 620	0.494635	2212949	3
Pt24_t2	ABCB1	5	2nd	Opal 690	0.285758	2212949	3
Pt24_t2	ERBB2	5	3rd	Opal 520	0.0375899	2212949	3
Pt37_t1	KRT20	1	1st	Opal 520	0.069879	114192	4
Pt37_t1	CDX2	1	2nd	Opal 570	0.554395	114192	4
Pt37_t1	KRT7	1	3rd	Opal 620	0.059097	114192	4
Pt37_t1	CDH1	1	4th	Opal 690	4.6088	114192	4
Pt37_t1	KRT20	2	1st	Opal 620	3.37349	97368	4
Pt37_t1	UGT1A	2	2nd	Opal 690	1.38991	97368	4
Pt37_t1	ABCG2	2	3rd	Opal 520	0.235454	97368	4
Pt37_t1	KI67	3	1st	Opal 520	4.90503	177717	4
Pt37_t1	UGT1A	3	2nd	Opal 620	0.645097	177717	4
Pt37_t1	HSF1	3	3rd	Opal 690	1.95278	177717	4
Pt37_t1	RIPK1	4	1st	Opal 520	1.06679	29468	4
Pt37_t1	RCC2	4	2nd	Opal 570	0.017059	29468	4
Pt37_t1	TP53	4	3rd	Opal 690	0.057362	29468	4
Pt37_t1	CFTR	5	1st	Opal 620	1.58953	156497	4
Pt37_t1	ABCB1	5	2nd	Opal 690	0.245295	156497	4
Pt37_t1	ERBB2	5	3rd	Opal 520	0.0646958	156497	4
Pt45_t1	KRT20	1	1st	Opal 520	0.006169	566129	4
Pt45_t1	CDX2	1	2nd	Opal 570	0.712416	566129	4
Pt45_t1	KRT7	1	3rd	Opal 620	0.033973	566129	4
Pt45_t1	CDH1	1	4th	Opal 690	1.29787	566129	4
Pt45_t1	KRT20	2	1st	Opal 620	0.260689	651339	4
Pt45_t1	UGT1A	2	2nd	Opal 690	0.150348	651339	4
Pt45_t1	ABCG2	2	3rd	Opal 520	0.509556	651339	4
Pt45_t1	KI67	3	1st	Opal 520	2.73138	761961	4
Pt45_t1	UGT1A	3	2nd	Opal 620	0.0333071	761961	4
Pt45_t1	HSF1	3	3rd	Opal 690	3.84994	761961	4
Pt45_t1	RIPK1	4	1st	Opal 520	0.23207	458657	4
Pt45_t1	RCC2	4	2nd	Opal 570	0.918209	458657	4
Pt45_t1	TP53	4	3rd	Opal 690	1.21284	458657	4
Pt45_t1	CFTR	5	1st	Opal 620	0.27447	665059	4
Pt45_t1	ABCB1	5	2nd	Opal 690	0.109287	665059	4
Pt45_t1	ERBB2	5	3rd	Opal 520	0.0692933	665059	4
Pt45_t2	KRT20	1	1st	Opal 520	0.075373	1122016	4
Pt45_t2	CDX2	1	2nd	Opal 570	0.353332	1122016	4
Pt45_t2	KRT7	1	3rd	Opal 620	0.034897	1122016	4
Pt45_t2	CDH1	1	4th	Opal 690	5.49342	1122016	4
Pt45_t2	KRT20	2	1st	Opal 620	1.24645	2151051	4
Pt45_t2	UGT1A	2	2nd	Opal 690	0.693221	2151051	4
Pt45_t2	ABCG2	2	3rd	Opal 520	1.5152	2151051	4
Pt45_t2	KI67	3	1st	Opal 520	3.06221	1255815	4
Pt45_t2	UGT1A	3	2nd	Opal 620	0.618598	1255815	4
Pt45_t2	HSF1	3	3rd	Opal 690	6.82615	1255815	4
Pt45_t2	RIPK1	4	1st	Opal 520	0.743638	1056644	4
Pt45_t2	RCC2	4	2nd	Opal 570	1.91248	1056644	4
Pt45_t2	TP53	4	3rd	Opal 690	1.98074	1056644	4
Pt45_t2	CFTR	5	1st	Opal 620	0.817396	1687978	4
Pt45_t2	ABCB1	5	2nd	Opal 690	0.127862	1687978	4
Pt45_t2	ERBB2	5	3rd	Opal 520	0.121117	1687978	4
Pt45_t3	KRT20	1	1st	Opal 520	0.061378	1489308	4
Pt45_t3	CDX2	1	2nd	Opal 570	0.322013	1489308	4
Pt45_t3	KRT7	1	3rd	Opal 620	0.0339	1489308	4
Pt45_t3	CDH1	1	4th	Opal 690	0.876138	1489308	4
Pt45_t3	KRT20	2	1st	Opal 620	0.224803	1191352	4
Pt45_t3	UGT1A	2	2nd	Opal 690	0.218975	1191352	4
Pt45_t3	ABCG2	2	3rd	Opal 520	0.476588	1191352	4
Pt45_t3	KI67	3	1st	Opal 520	2.52438	859954	4
Pt45_t3	UGT1A	3	2nd	Opal 620	0.323216	859954	4
Pt45_t3	HSF1	3	3rd	Opal 690	6.34941	859954	4
Pt45_t3	RIPK1	4	1st	Opal 520	0.257431	1538028	4
Pt45_t3	RCC2	4	2nd	Opal 570	0.751543	1538028	4
Pt45_t3	TP53	4	3rd	Opal 690	1.6587	1538028	4
Pt45_t3	CFTR	5	1st	Opal 620	0.216	1739142	4
Pt45_t3	ABCB1	5	2nd	Opal 690	0.0932031	1739142	4
Pt45_t3	ERBB2	5	3rd	Opal 520	0.0853241	1739142	4
Pt39_t1	KRT20	1	1st	Opal 520	0.12402	1130293	4
Pt39_t1	CDX2	1	2nd	Opal 570	1.07847	1130293	4
Pt39_t1	KRT7	1	3rd	Opal 620	0.069821	1130293	4
Pt39_t1	CDH1	1	4th	Opal 690	7.05792	1130293	4
Pt39_t1	KRT20	2	1st	Opal 620	2.25452	1183474	4
Pt39_t1	UGT1A	2	2nd	Opal 690	4.11862	1183474	4
Pt39_t1	ABCG2	2	3rd	Opal 520	0.282243	1183474	4
Pt39_t1	KI67	3	1st	Opal 520	2.09526	1038209	4
Pt39_t1	UGT1A	3	2nd	Opal 620	4.2286	1038209	4
Pt39_t1	HSF1	3	3rd	Opal 690	0.39608	1038209	4
Pt39_t1	RIPK1	4	1st	Opal 520	2.1539	1010662	4
Pt39_t1	RCC2	4	2nd	Opal 570	2.40504	1010662	4
Pt39_t1	TP53	4	3rd	Opal 690	1.30799	1010662	4
Pt39_t1	CFTR	5	1st	Opal 620	2.62442	1165890	4
Pt39_t1	ABCB1	5	2nd	Opal 690	1.88976	1165890	4
Pt39_t1	ERBB2	5	3rd	Opal 520	0.0276862	1165890	4
Pt39_t2	KRT20	1	1st	Opal 520	0.011451	9032	4
Pt39_t2	CDX2	1	2nd	Opal 570	0.265256	9032	4
Pt39_t2	KRT7	1	3rd	Opal 620	0.004786	9032	4
Pt39_t2	CDH1	1	4th	Opal 690	0.418085	9032	4
Pt39_t2	KRT20	2	1st	Opal 620	0.471667	64458	4
Pt39_t2	UGT1A	2	2nd	Opal 690	0.455329	64458	4
Pt39_t2	ABCG2	2	3rd	Opal 520	0.205093	64458	4
Pt39_t2	KI67	3	1st	Opal 520	0.064357	27886	4
Pt39_t2	UGT1A	3	2nd	Opal 620	1.96212	27886	4
Pt39_t2	HSF1	3	3rd	Opal 690	0.828611	27886	4
Pt39_t2	RIPK1	4	1st	Opal 520	0.084286	20284	4
Pt39_t2	RCC2	4	2nd	Opal 570	0.161784	20284	4
Pt39_t2	TP53	4	3rd	Opal 690	0.351755	20284	4
Pt39_t2	CFTR	5	1st	Opal 620	0.271665	20655	4
Pt39_t2	ABCB1	5	2nd	Opal 690	1.62913	20655	4
Pt39_t2	ERBB2	5	3rd	Opal 520	0.0534123	20655	4
Pt31_t1	KRT20	1	1st	Opal 520	0.024937	1430172	3
Pt31_t1	CDX2	1	2nd	Opal 570	2.5936	1430172	3
Pt31_t1	KRT7	1	3rd	Opal 620	0.02814	1430172	3
Pt31_t1	CDH1	1	4th	Opal 690	5.42535	1430172	3
Pt31_t1	KRT20	2	1st	Opal 620	0.728963	2512547	3
Pt31_t1	UGT1A	2	2nd	Opal 690	0.438444	2512547	3
Pt31_t1	ABCG2	2	3rd	Opal 520	1.20536	2512547	3
Pt31_t1	KI67	3	1st	Opal 520	2.35335	925874	3
Pt31_t1	UGT1A	3	2nd	Opal 620	0.527091	925874	3
Pt31_t1	HSF1	3	3rd	Opal 690	0.932857	925874	3
Pt31_t1	RIPK1	4	1st	Opal 520	0.454398	1378032	3
Pt31_t1	RCC2	4	2nd	Opal 570	1.9649	1378032	3
Pt31_t1	TP53	4	3rd	Opal 690	0.073613	1378032	3
Pt31_t1	CFTR	5	1st	Opal 620	1.25896	2397452	3
Pt31_t1	ABCB1	5	2nd	Opal 690	3.23002	2397452	3
Pt31_t1	ERBB2	5	3rd	Opal 520	0.120697	2397452	3
Pt31_t2	KRT20	1	1st	Opal 520	0.111836	1800500	3
Pt31_t2	CDX2	1	2nd	Opal 570	1.48513	1800500	3
Pt31_t2	KRT7	1	3rd	Opal 620	0.01839	1800500	3
Pt31_t2	CDH1	1	4th	Opal 690	4.07043	1800500	3
Pt31_t2	KRT20	2	1st	Opal 620	1.60301	2906298	3
Pt31_t2	UGT1A	2	2nd	Opal 690	1.50931	2906298	3
Pt31_t2	ABCG2	2	3rd	Opal 520	1.44512	2906298	3
Pt31_t2	KI67	3	1st	Opal 520	1.12495	1044537	3
Pt31_t2	UGT1A	3	2nd	Opal 620	1.10138	1044537	3
Pt31_t2	HSF1	3	3rd	Opal 690	2.19446	1044537	3
Pt31_t2	RIPK1	4	1st	Opal 520	0.496838	1003544	3
Pt31_t2	RCC2	4	2nd	Opal 570	2.11239	1003544	3
Pt31_t2	TP53	4	3rd	Opal 690	0.071509	1003544	3
Pt31_t2	CFTR	5	1st	Opal 620	1.18895	3846426	3
Pt31_t2	ABCB1	5	2nd	Opal 690	3.70125	3846426	3
Pt31_t2	ERBB2	5	3rd	Opal 520	0.168876	3846426	3
Pt43_t1	KRT20	1	1st	Opal 520	0.007913	573496	4
Pt43_t1	CDX2	1	2nd	Opal 570	0.493506	573496	4
Pt43_t1	KRT7	1	3rd	Opal 620	0.024871	573496	4
Pt43_t1	CDH1	1	4th	Opal 690	4.0672	573496	4
Pt43_t1	KRT20	2	1st	Opal 620	0.581825	851613	4
Pt43_t1	UGT1A	2	2nd	Opal 690	0.109603	851613	4
Pt43_t1	ABCG2	2	3rd	Opal 520	0.260376	851613	4
Pt43_t1	KI67	3	1st	Opal 520	3.23148	629751	4
Pt43_t1	UGT1A	3	2nd	Opal 620	0.170003	629751	4
Pt43_t1	HSF1	3	3rd	Opal 690	6.65449	629751	4
Pt43_t1	RIPK1	4	1st	Opal 520	1.48716	521316	4
Pt43_t1	RCC2	4	2nd	Opal 570	0.504019	521316	4
Pt43_t1	TP53	4	3rd	Opal 690	6.5811	521316	4
Pt43_t1	CFTR	5	1st	Opal 620	0.71299	717171	4
Pt43_t1	ABCB1	5	2nd	Opal 690	3.16756	717171	4
Pt43_t1	ERBB2	5	3rd	Opal 520	0.0959417	717171	4
Pt43_t3	KRT20	1	1st	Opal 520	0.037309	2780768	4
Pt43_t3	CDX2	1	2nd	Opal 570	3.4363	2780768	4
Pt43_t3	KRT7	1	3rd	Opal 620	0.104608	2780768	4
Pt43_t3	CDH1	1	4th	Opal 690	5.26	2780768	4
Pt43_t3	KRT20	2	1st	Opal 620	0.662961	4103888	4
Pt43_t3	UGT1A	2	2nd	Opal 690	0.27636	4103888	4
Pt43_t3	ABCG2	2	3rd	Opal 520	0.354701	4103888	4
Pt43_t3	KI67	3	1st	Opal 520	3.15738	3490353	4
Pt43_t3	UGT1A	3	2nd	Opal 620	0.603088	3490353	4
Pt43_t3	HSF1	3	3rd	Opal 690	2.78473	3490353	4
Pt43_t3	RIPK1	4	1st	Opal 520	1.89857	3677988	4
Pt43_t3	RCC2	4	2nd	Opal 570	1.97652	3677988	4
Pt43_t3	TP53	4	3rd	Opal 690	3.06931	3677988	4
Pt43_t3	CFTR	5	1st	Opal 620	0.727657	5371248	4
Pt43_t3	ABCB1	5	2nd	Opal 690	0.831171	5371248	4
Pt43_t3	ERBB2	5	3rd	Opal 520	0.0882578	5371248	4
Pt38_t1	KRT20	1	1st	Opal 520	0.008084	2323340	4
Pt38_t1	CDX2	1	2nd	Opal 570	4.14796	2323340	4
Pt38_t1	KRT7	1	3rd	Opal 620	0.06562	2323340	4
Pt38_t1	CDH1	1	4th	Opal 690	3.89068	2323340	4
Pt38_t1	KRT20	2	1st	Opal 620	0.194468	3214585	4
Pt38_t1	UGT1A	2	2nd	Opal 690	0.132814	3214585	4
Pt38_t1	ABCG2	2	3rd	Opal 520	0.0980887	3214585	4
Pt38_t1	KI67	3	1st	Opal 520	2.71018	2198614	4
Pt38_t1	UGT1A	3	2nd	Opal 620	0.190408	2198614	4
Pt38_t1	HSF1	3	3rd	Opal 690	4.7555	2198614	4
Pt38_t1	RIPK1	4	1st	Opal 520	1.16718	2169531	4
Pt38_t1	RCC2	4	2nd	Opal 570	1.96349	2169531	4
Pt38_t1	TP53	4	3rd	Opal 690	0.159774	2169531	4
Pt38_t1	CFTR	5	1st	Opal 620	0.276282	2695956	4
Pt38_t1	ABCB1	5	2nd	Opal 690	0.847558	2695956	4
Pt38_t1	ERBB2	5	3rd	Opal 520	0.231745	2695956	4
Pt38_t2	KRT20	1	1st	Opal 520	0.018011	2141765	4
Pt38_t2	CDX2	1	2nd	Opal 570	4.5809	2141765	4
Pt38_t2	KRT7	1	3rd	Opal 620	0.085989	2141765	4
Pt38_t2	CDH1	1	4th	Opal 690	5.49188	2141765	4
Pt38_t2	KRT20	2	1st	Opal 620	0.252471	3678124	4
Pt38_t2	UGT1A	2	2nd	Opal 690	0.487364	3678124	4
Pt38_t2	ABCG2	2	3rd	Opal 520	0.212004	3678124	4
Pt38_t2	KI67	3	1st	Opal 520	2.29431	2351059	4
Pt38_t2	UGT1A	3	2nd	Opal 620	0.519231	2351059	4
Pt38_t2	HSF1	3	3rd	Opal 690	2.20867	2351059	4
Pt38_t2	RIPK1	4	1st	Opal 520	1.181	1908609	4
Pt38_t2	RCC2	4	2nd	Opal 570	2.67846	1908609	4
Pt38_t2	TP53	4	3rd	Opal 690	0.225988	1908609	4
Pt38_t2	CFTR	5	1st	Opal 620	0.714846	3202172	4
Pt38_t2	ABCB1	5	2nd	Opal 690	1.47505	3202172	4
Pt38_t2	ERBB2	5	3rd	Opal 520	0.161902	3202172	4
Pt32_t1	KRT20	1	1st	Opal 520	0.99449	1318666	4
Pt32_t1	CDX2	1	2nd	Opal 570	2.22595	1318666	4
Pt32_t1	KRT7	1	3rd	Opal 620	0.060287	1318666	4
Pt32_t1	CDH1	1	4th	Opal 690	5.31396	1318666	4
Pt32_t1	KRT20	2	1st	Opal 620	6.96848	1861652	4
Pt32_t1	UGT1A	2	2nd	Opal 690	4.08178	1861652	4
Pt32_t1	ABCG2	2	3rd	Opal 520	2.62992	1861652	4
Pt32_t1	KI67	3	1st	Opal 520	1.99924	1379229	4
Pt32_t1	UGT1A	3	2nd	Opal 620	8.35344	1379229	4
Pt32_t1	HSF1	3	3rd	Opal 690	0.774487	1379229	4
Pt32_t1	RIPK1	4	1st	Opal 520	3.00513	1190105	4
Pt32_t1	RCC2	4	2nd	Opal 570	1.3242	1190105	4
Pt32_t1	TP53	4	3rd	Opal 690	0.11293	1190105	4
Pt32_t1	CFTR	5	1st	Opal 620	3.47486	1779657	4
Pt32_t1	ABCB1	5	2nd	Opal 690	2.01997	1779657	4
Pt32_t1	ERBB2	5	3rd	Opal 520	0.0608158	1779657	4
Pt32_t2	KRT20	1	1st	Opal 520	0.642447	2103382	4
Pt32_t2	CDX2	1	2nd	Opal 570	4.75918	2103382	4
Pt32_t2	KRT7	1	3rd	Opal 620	0.15353	2103382	4
Pt32_t2	CDH1	1	4th	Opal 690	5.88335	2103382	4
Pt32_t2	KRT20	2	1st	Opal 620	4.36481	3222522	4
Pt32_t2	UGT1A	2	2nd	Opal 690	2.89252	3222522	4
Pt32_t2	ABCG2	2	3rd	Opal 520	2.67946	3222522	4
Pt32_t2	KI67	3	1st	Opal 520	2.17131	2134975	4
Pt32_t2	UGT1A	3	2nd	Opal 620	4.97146	2134975	4
Pt32_t2	HSF1	3	3rd	Opal 690	0.697458	2134975	4
Pt32_t2	RIPK1	4	1st	Opal 520	2.25571	1797702	4
Pt32_t2	RCC2	4	2nd	Opal 570	3.18429	1797702	4
Pt32_t2	TP53	4	3rd	Opal 690	0.150581	1797702	4
Pt32_t2	CFTR	5	1st	Opal 620	2.66181	3226937	4
Pt32_t2	ABCB1	5	2nd	Opal 690	1.67267	3226937	4
Pt32_t2	ERBB2	5	3rd	Opal 520	0.09117	3226937	4
Pt32_t3	KRT20	1	1st	Opal 520	0.80819	1470836	4
Pt32_t3	CDX2	1	2nd	Opal 570	3.52423	1470836	4
Pt32_t3	KRT7	1	3rd	Opal 620	0.109288	1470836	4
Pt32_t3	CDH1	1	4th	Opal 690	6.07792	1470836	4
Pt32_t3	KRT20	2	1st	Opal 620	5.79137	2245115	4
Pt32_t3	UGT1A	2	2nd	Opal 690	3.97174	2245115	4
Pt32_t3	ABCG2	2	3rd	Opal 520	3.3443	2245115	4
Pt32_t3	KI67	3	1st	Opal 520	1.1721	1376643	4
Pt32_t3	UGT1A	3	2nd	Opal 620	9.51856	1376643	4
Pt32_t3	HSF1	3	3rd	Opal 690	1.0521	1376643	4
Pt32_t3	RIPK1	4	1st	Opal 520	2.75756	1349392	4
Pt32_t3	RCC2	4	2nd	Opal 570	3.29116	1349392	4
Pt32_t3	TP53	4	3rd	Opal 690	0.209998	1349392	4
Pt32_t3	CFTR	5	1st	Opal 620	7.5735	2009353	4
Pt32_t3	ABCB1	5	2nd	Opal 690	1.64346	2009353	4
Pt32_t3	ERBB2	5	3rd	Opal 520	0.105408	2009353	4
Pt35_t2	KRT20	1	1st	Opal 520	0.059722	2187441	4
Pt35_t2	CDX2	1	2nd	Opal 570	3.5049	2187441	4
Pt35_t2	KRT7	1	3rd	Opal 620	0.059267	2187441	4
Pt35_t2	CDH1	1	4th	Opal 690	1.18244	2187441	4
Pt35_t2	KRT20	2	1st	Opal 620	0.21993	2685037	4
Pt35_t2	UGT1A	2	2nd	Opal 690	0.0537858	2685037	4
Pt35_t2	ABCG2	2	3rd	Opal 520	0.10019	2685037	4
Pt35_t2	KI67	3	1st	Opal 520	3.55185	1424527	4
Pt35_t2	UGT1A	3	2nd	Opal 620	0.0777403	1424527	4
Pt35_t2	HSF1	3	3rd	Opal 690	5.17891	1424527	4
Pt35_t2	RIPK1	4	1st	Opal 520	0.229918	1728927	4
Pt35_t2	RCC2	4	2nd	Opal 570	1.63995	1728927	4
Pt35_t2	TP53	4	3rd	Opal 690	0.172527	1728927	4
Pt35_t2	CFTR	5	1st	Opal 620	0.184677	3086184	4
Pt35_t2	ABCB1	5	2nd	Opal 690	1.82786	3086184	4
Pt35_t2	ERBB2	5	3rd	Opal 520	0.0944926	3086184	4
Pt42_t2	KRT20	1	1st	Opal 520	0.036343	1047988	4
Pt42_t2	CDX2	1	2nd	Opal 570	1.84415	1047988	4
Pt42_t2	KRT7	1	3rd	Opal 620	0.067936	1047988	4
Pt42_t2	CDH1	1	4th	Opal 690	4.44899	1047988	4
Pt42_t2	KRT20	2	1st	Opal 620	0.293664	1478240	4
Pt42_t2	UGT1A	2	2nd	Opal 690	0.126814	1478240	4
Pt42_t2	ABCG2	2	3rd	Opal 520	0.283139	1478240	4
Pt42_t2	KI67	3	1st	Opal 520	2.44854	1152088	4
Pt42_t2	UGT1A	3	2nd	Opal 620	0.0261395	1152088	4
Pt42_t2	HSF1	3	3rd	Opal 690	7.31242	1152088	4
Pt42_t2	RIPK1	4	1st	Opal 520	0.457288	691508	4
Pt42_t2	RCC2	4	2nd	Opal 570	1.31344	691508	4
Pt42_t2	TP53	4	3rd	Opal 690	0.594291	691508	4
Pt42_t2	CFTR	5	1st	Opal 620	0.15758	1071154	4
Pt42_t2	ABCB1	5	2nd	Opal 690	0.889105	1071154	4
Pt42_t2	ERBB2	5	3rd	Opal 520	0.0467311	1071154	4
Pt40_t2	KRT20	1	1st	Opal 520	0.053168	1793988	4
Pt40_t2	CDX2	1	2nd	Opal 570	1.23328	1793988	4
Pt40_t2	KRT7	1	3rd	Opal 620	0.042069	1793988	4
Pt40_t2	CDH1	1	4th	Opal 690	1.54346	1793988	4
Pt40_t2	KRT20	2	1st	Opal 620	0.170997	1933363	4
Pt40_t2	UGT1A	2	2nd	Opal 690	0.0966866	1933363	4
Pt40_t2	ABCG2	2	3rd	Opal 520	0.303231	1933363	4
Pt40_t2	KI67	3	1st	Opal 520	3.23073	2017753	4
Pt40_t2	UGT1A	3	2nd	Opal 620	0.0909639	2017753	4
Pt40_t2	HSF1	3	3rd	Opal 690	3.8876	2017753	4
Pt40_t2	RIPK1	4	1st	Opal 520	0.668168	1699615	4
Pt40_t2	RCC2	4	2nd	Opal 570	1.59448	1699615	4
Pt40_t2	TP53	4	3rd	Opal 690	0.79294	1699615	4
Pt40_t2	CFTR	5	1st	Opal 620	0.347547	2068518	4
Pt40_t2	ABCB1	5	2nd	Opal 690	0.712509	2068518	4
Pt40_t2	ERBB2	5	3rd	Opal 520	0.0755403	2068518	4
Pt44_t1	KRT20	1	1st	Opal 520	0.14643	1618564	4
Pt44_t1	CDX2	1	2nd	Opal 570	0.761658	1618564	4
Pt44_t1	KRT7	1	3rd	Opal 620	0.032086	1618564	4
Pt44_t1	CDH1	1	4th	Opal 690	2.17689	1618564	4
Pt44_t1	KRT20	2	1st	Opal 620	2.27234	2974389	4
Pt44_t1	UGT1A	2	2nd	Opal 690	0.329947	2974389	4
Pt44_t1	ABCG2	2	3rd	Opal 520	1.30451	2974389	4
Pt44_t1	KI67	3	1st	Opal 520	1.72993	1846957	4
Pt44_t1	UGT1A	3	2nd	Opal 620	0.207755	1846957	4
Pt44_t1	HSF1	3	3rd	Opal 690	5.03636	1846957	4
Pt44_t1	RIPK1	4	1st	Opal 520	0.781033	1665088	4
Pt44_t1	RCC2	4	2nd	Opal 570	1.17462	1665088	4
Pt44_t1	TP53	4	3rd	Opal 690	1.45737	1665088	4
Pt44_t1	CFTR	5	1st	Opal 620	0.304649	1730680	4
Pt44_t1	ABCB1	5	2nd	Opal 690	0.619036	1730680	4
Pt44_t1	ERBB2	5	3rd	Opal 520	0.173104	1730680	4
Pt44_t2	KRT20	1	1st	Opal 520	0.099432	907108	4
Pt44_t2	CDX2	1	2nd	Opal 570	0.118634	907108	4
Pt44_t2	KRT7	1	3rd	Opal 620	0.027052	907108	4
Pt44_t2	CDH1	1	4th	Opal 690	2.21891	907108	4
Pt44_t2	KRT20	2	1st	Opal 620	0.54885	1089719	4
Pt44_t2	UGT1A	2	2nd	Opal 690	0.339897	1089719	4
Pt44_t2	ABCG2	2	3rd	Opal 520	0.970135	1089719	4
Pt44_t2	KI67	3	1st	Opal 520	0.0452153	1017110	4
Pt44_t2	UGT1A	3	2nd	Opal 620	0.36241	1017110	4
Pt44_t2	HSF1	3	3rd	Opal 690	2.78874	1017110	4
Pt44_t2	RIPK1	4	1st	Opal 520	0.214841	817393	4
Pt44_t2	RCC2	4	2nd	Opal 570	0.060438	817393	4
Pt44_t2	TP53	4	3rd	Opal 690	0.322347	817393	4
Pt44_t2	CFTR	5	1st	Opal 620	0.122952	1139091	4
Pt44_t2	ABCB1	5	2nd	Opal 690	0.457245	1139091	4
Pt44_t2	ERBB2	5	3rd	Opal 520	0.12274	1139091	4
Pt44_t4	KRT20	1	1st	Opal 520	0.861967	1280960	4
Pt44_t4	CDX2	1	2nd	Opal 570	0.700281	1280960	4
Pt44_t4	KRT7	1	3rd	Opal 620	0.033958	1280960	4
Pt44_t4	CDH1	1	4th	Opal 690	6.32587	1280960	4
Pt44_t4	KRT20	2	1st	Opal 620	4.93009	1560124	4
Pt44_t4	UGT1A	2	2nd	Opal 690	3.08659	1560124	4
Pt44_t4	ABCG2	2	3rd	Opal 520	3.41576	1560124	4
Pt44_t4	KI67	3	1st	Opal 520	2.63409	893686	4
Pt44_t4	UGT1A	3	2nd	Opal 620	5.89432	893686	4
Pt44_t4	HSF1	3	3rd	Opal 690	7.23567	893686	4
Pt44_t4	RIPK1	4	1st	Opal 520	4.04071	1192347	4
Pt44_t4	RCC2	4	2nd	Opal 570	1.27262	1192347	4
Pt44_t4	TP53	4	3rd	Opal 690	4.73861	1192347	4
Pt44_t4	CFTR	5	1st	Opal 620	0.60683	1004147	4
Pt44_t4	ABCB1	5	2nd	Opal 690	3.23806	1004147	4
Pt44_t4	ERBB2	5	3rd	Opal 520	0.132179	1004147	4
Pt46_t1	KRT20	1	1st	Opal 520	0.058894	1770484	5
Pt46_t1	CDX2	1	2nd	Opal 570	1.22176	1770484	5
Pt46_t1	KRT7	1	3rd	Opal 620	0.032153	1770484	5
Pt46_t1	CDH1	1	4th	Opal 690	2.31749	1770484	5
Pt46_t1	KRT20	2	1st	Opal 620	0.108571	2908096	5
Pt46_t1	UGT1A	2	2nd	Opal 690	0.0580564	2908096	5
Pt46_t1	ABCG2	2	3rd	Opal 520	0.0946431	2908096	5
Pt46_t1	KI67	3	1st	Opal 520	2.63074	2332957	5
Pt46_t1	UGT1A	3	2nd	Opal 620	0.0186268	2332957	5
Pt46_t1	HSF1	3	3rd	Opal 690	4.34316	2332957	5
Pt46_t1	RIPK1	4	1st	Opal 520	0.332609	2099791	5
Pt46_t1	RCC2	4	2nd	Opal 570	1.74891	2099791	5
Pt46_t1	TP53	4	3rd	Opal 690	0.637577	2099791	5
Pt46_t1	CFTR	5	1st	Opal 620	0.231842	3272381	5
Pt46_t1	ABCB1	5	2nd	Opal 690	0.34997	3272381	5
Pt46_t1	ERBB2	5	3rd	Opal 520	0.069828	3272381	5
Pt46_t2	KRT20	1	1st	Opal 520	0.054623	1370212	5
Pt46_t2	CDX2	1	2nd	Opal 570	2.43954	1370212	5
Pt46_t2	KRT7	1	3rd	Opal 620	0.051348	1370212	5
Pt46_t2	CDH1	1	4th	Opal 690	0.782584	1370212	5
Pt46_t2	KRT20	2	1st	Opal 620	0.130966	2015590	5
Pt46_t2	UGT1A	2	2nd	Opal 690	0.102947	2015590	5
Pt46_t2	ABCG2	2	3rd	Opal 520	0.13746	2015590	5
Pt46_t2	KI67	3	1st	Opal 520	3.28457	1598441	5
Pt46_t2	UGT1A	3	2nd	Opal 620	0.183328	1598441	5
Pt46_t2	HSF1	3	3rd	Opal 690	5.85091	1598441	5
Pt46_t2	RIPK1	4	1st	Opal 520	0.262942	1598134	5
Pt46_t2	RCC2	4	2nd	Opal 570	2.28266	1598134	5
Pt46_t2	TP53	4	3rd	Opal 690	1.13792	1598134	5
Pt46_t2	CFTR	5	1st	Opal 620	0.161749	1522529	5
Pt46_t2	ABCB1	5	2nd	Opal 690	0.191781	1522529	5
Pt46_t2	ERBB2	5	3rd	Opal 520	0.0423598	1522529	5
Pt49_t1	KRT20	1	1st	Opal 520	0.075025	1554920	5
Pt49_t1	CDX2	1	2nd	Opal 570	4.26493	1554920	5
Pt49_t1	KRT7	1	3rd	Opal 620	0.129565	1554920	5
Pt49_t1	CDH1	1	4th	Opal 690	2.84356	1554920	5
Pt49_t1	KRT20	2	1st	Opal 620	0.0981043	1971293	5
Pt49_t1	UGT1A	2	2nd	Opal 690	0.168617	1971293	5
Pt49_t1	ABCG2	2	3rd	Opal 520	0.0993976	1971293	5
Pt49_t1	KI67	3	1st	Opal 520	2.44086	1207050	5
Pt49_t1	UGT1A	3	2nd	Opal 620	0.630662	1207050	5
Pt49_t1	HSF1	3	3rd	Opal 690	0.726694	1207050	5
Pt49_t1	RIPK1	4	1st	Opal 520	0.171922	1447346	5
Pt49_t1	RCC2	4	2nd	Opal 570	2.34907	1447346	5
Pt49_t1	TP53	4	3rd	Opal 690	0.07165	1447346	5
Pt49_t1	CFTR	5	1st	Opal 620	0.408592	2259874	5
Pt49_t1	ABCB1	5	2nd	Opal 690	0.710854	2259874	5
Pt49_t1	ERBB2	5	3rd	Opal 520	0.0594535	2259874	5
Pt49_t2	KRT20	1	1st	Opal 520	0.110941	1534944	5
Pt49_t2	CDX2	1	2nd	Opal 570	1.54987	1534944	5
Pt49_t2	KRT7	1	3rd	Opal 620	0.081732	1534944	5
Pt49_t2	CDH1	1	4th	Opal 690	2.26782	1534944	5
Pt49_t2	KRT20	2	1st	Opal 620	0.162669	2714110	5
Pt49_t2	UGT1A	2	2nd	Opal 690	0.133735	2714110	5
Pt49_t2	ABCG2	2	3rd	Opal 520	0.0891577	2714110	5
Pt49_t2	KI67	3	1st	Opal 520	1.38984	1512376	5
Pt49_t2	UGT1A	3	2nd	Opal 620	0.24824	1512376	5
Pt49_t2	HSF1	3	3rd	Opal 690	4.64148	1512376	5
Pt49_t2	RIPK1	4	1st	Opal 520	0.153449	1473687	5
Pt49_t2	RCC2	4	2nd	Opal 570	0.975742	1473687	5
Pt49_t2	TP53	4	3rd	Opal 690	0.060539	1473687	5
Pt49_t2	CFTR	5	1st	Opal 620	0.214306	2153136	5
Pt49_t2	ABCB1	5	2nd	Opal 690	1.00616	2153136	5
Pt49_t2	ERBB2	5	3rd	Opal 520	0.0564747	2153136	5
Pt49_t3	KRT20	1	1st	Opal 520	0.080078	1227202	5
Pt49_t3	CDX2	1	2nd	Opal 570	0.853927	1227202	5
Pt49_t3	KRT7	1	3rd	Opal 620	0.023568	1227202	5
Pt49_t3	CDH1	1	4th	Opal 690	0.425051	1227202	5
Pt49_t3	KRT20	2	1st	Opal 620	0.205792	2018276	5
Pt49_t3	UGT1A	2	2nd	Opal 690	0.117495	2018276	5
Pt49_t3	ABCG2	2	3rd	Opal 520	0.104108	2018276	5
Pt49_t3	KI67	3	1st	Opal 520	1.95551	1684341	5
Pt49_t3	UGT1A	3	2nd	Opal 620	0.238389	1684341	5
Pt49_t3	HSF1	3	3rd	Opal 690	4.80153	1684341	5
Pt49_t3	RIPK1	4	1st	Opal 520	0.053754	1551519	5
Pt49_t3	RCC2	4	2nd	Opal 570	1.23747	1551519	5
Pt49_t3	TP53	4	3rd	Opal 690	0.051627	1551519	5
Pt49_t3	CFTR	5	1st	Opal 620	0.15267	1739971	5
Pt49_t3	ABCB1	5	2nd	Opal 690	0.352982	1739971	5
Pt49_t3	ERBB2	5	3rd	Opal 520	0.0352015	1739971	5
Pt49_t4	KRT20	1	1st	Opal 520	0.060446	2072108	5
Pt49_t4	CDX2	1	2nd	Opal 570	1.3208	2072108	5
Pt49_t4	KRT7	1	3rd	Opal 620	0.034772	2072108	5
Pt49_t4	CDH1	1	4th	Opal 690	3.03884	2072108	5
Pt49_t4	KRT20	2	1st	Opal 620	0.0593095	2252512	5
Pt49_t4	UGT1A	2	2nd	Opal 690	0.0775397	2252512	5
Pt49_t4	ABCG2	2	3rd	Opal 520	0.078895	2252512	5
Pt49_t4	KI67	3	1st	Opal 520	2.37637	2009833	5
Pt49_t4	UGT1A	3	2nd	Opal 620	0.0599419	2009833	5
Pt49_t4	HSF1	3	3rd	Opal 690	2.6028	2009833	5
Pt49_t4	RIPK1	4	1st	Opal 520	0.109171	1899620	5
Pt49_t4	RCC2	4	2nd	Opal 570	1.33479	1899620	5
Pt49_t4	TP53	4	3rd	Opal 690	0.053312	1899620	5
Pt49_t4	CFTR	5	1st	Opal 620	0.197479	2114539	5
Pt49_t4	ABCB1	5	2nd	Opal 690	0.595278	2114539	5
Pt49_t4	ERBB2	5	3rd	Opal 520	0.0351232	2114539	5
Pt52_t1	KRT20	1	1st	Opal 520	0.518261	2156764	5
Pt52_t1	CDX2	1	2nd	Opal 570	0.250104	2156764	5
Pt52_t1	KRT7	1	3rd	Opal 620	0.05162	2156764	5
Pt52_t1	CDH1	1	4th	Opal 690	7.54561	2156764	5
Pt52_t1	KRT20	2	1st	Opal 620	3.6281	2618903	5
Pt52_t1	UGT1A	2	2nd	Opal 690	0.286685	2618903	5
Pt52_t1	ABCG2	2	3rd	Opal 520	0.19121	2618903	5
Pt52_t1	KI67	3	1st	Opal 520	4.13186	1919126	5
Pt52_t1	UGT1A	3	2nd	Opal 620	1.00251	1919126	5
Pt52_t1	HSF1	3	3rd	Opal 690	4.15941	1919126	5
Pt52_t1	RIPK1	4	1st	Opal 520	2.55542	2282290	5
Pt52_t1	RCC2	4	2nd	Opal 570	4.15544	2282290	5
Pt52_t1	TP53	4	3rd	Opal 690	2.41853	2282290	5
Pt52_t1	CFTR	5	1st	Opal 620	2.20357	1676850	5
Pt52_t1	ABCB1	5	2nd	Opal 690	0.241196	1676850	5
Pt52_t1	ERBB2	5	3rd	Opal 520	0.0752497	1676850	5
Pt52_t2	KRT20	1	1st	Opal 520	0.937089	989340	5
Pt52_t2	CDX2	1	2nd	Opal 570	0.824804	989340	5
Pt52_t2	KRT7	1	3rd	Opal 620	0.050097	989340	5
Pt52_t2	CDH1	1	4th	Opal 690	4.36973	989340	5
Pt52_t2	KRT20	2	1st	Opal 620	4.52974	1048615	5
Pt52_t2	UGT1A	2	2nd	Opal 690	0.319835	1048615	5
Pt52_t2	ABCG2	2	3rd	Opal 520	0.167214	1048615	5
Pt52_t2	KI67	3	1st	Opal 520	3.66051	839811	5
Pt52_t2	UGT1A	3	2nd	Opal 620	0.704475	839811	5
Pt52_t2	HSF1	3	3rd	Opal 690	3.85456	839811	5
Pt52_t2	RIPK1	4	1st	Opal 520	1.50371	909085	5
Pt52_t2	RCC2	4	2nd	Opal 570	7.65491	909085	5
Pt52_t2	TP53	4	3rd	Opal 690	0.393363	909085	5
Pt52_t2	CFTR	5	1st	Opal 620	1.48808	1133837	5
Pt52_t2	ABCB1	5	2nd	Opal 690	0.344257	1133837	5
Pt52_t2	ERBB2	5	3rd	Opal 520	0.053719	1133837	5
Pt50_t3	KRT20	1	1st	Opal 520	0.12048	2144392	5
Pt50_t3	CDX2	1	2nd	Opal 570	2.63219	2144392	5
Pt50_t3	KRT7	1	3rd	Opal 620	0.063812	2144392	5
Pt50_t3	CDH1	1	4th	Opal 690	8.05228	2144392	5
Pt50_t3	KRT20	2	1st	Opal 620	0.454578	3107229	5
Pt50_t3	UGT1A	2	2nd	Opal 690	1.05843	3107229	5
Pt50_t3	ABCG2	2	3rd	Opal 520	0.131415	3107229	5
Pt50_t3	KI67	3	1st	Opal 520	2.76696	1978818	5
Pt50_t3	UGT1A	3	2nd	Opal 620	1.44855	1978818	5
Pt50_t3	HSF1	3	3rd	Opal 690	5.64034	1978818	5
Pt50_t3	RIPK1	4	1st	Opal 520	0.637615	1703345	5
Pt50_t3	RCC2	4	2nd	Opal 570	4.56704	1703345	5
Pt50_t3	TP53	4	3rd	Opal 690	2.14571	1703345	5
Pt50_t3	CFTR	5	1st	Opal 620	1.12327	2222157	5
Pt50_t3	ABCB1	5	2nd	Opal 690	0.382494	2222157	5
Pt50_t3	ERBB2	5	3rd	Opal 520	0.0310187	2222157	5
Pt54_t1.1	KRT20	1	1st	Opal 520	0.022076	853244	1
Pt54_t1.1	CDX2	1	2nd	Opal 570	1.15944	853244	1
Pt54_t1.1	KRT7	1	3rd	Opal 620	0.00544	853244	1
Pt54_t1.1	CDH1	1	4th	Opal 690	4.63641	853244	1
Pt54_t1.1	KRT20	2	1st	Opal 620	1.21087	1377206	1
Pt54_t1.1	UGT1A	2	2nd	Opal 690	0.835694	1377206	1
Pt54_t1.1	ABCG2	2	3rd	Opal 520	0.368992	1377206	1
Pt54_t1.1	KI67	3	1st	Opal 520	3.31064	1075500	1
Pt54_t1.1	UGT1A	3	2nd	Opal 620	0.261089	1075500	1
Pt54_t1.1	HSF1	3	3rd	Opal 690	6.68697	1075500	1
Pt54_t1.1	RIPK1	4	1st	Opal 520	2.28921	992511	1
Pt54_t1.1	RCC2	4	2nd	Opal 570	2.90224	992511	1
Pt54_t1.1	TP53	4	3rd	Opal 690	1.42561	992511	1
Pt54_t1.1	CFTR	5	1st	Opal 620	0.838566	1157903	1
Pt54_t1.1	ABCB1	5	2nd	Opal 690	1.86861	1157903	1
Pt54_t1.1	ERBB2	5	3rd	Opal 520	0.563459	1157903	1
Pt54_t1.2	KRT20	1	1st	Opal 520	0.327607	2388756	1
Pt54_t1.2	CDX2	1	2nd	Opal 570	2.44077	2388756	1
Pt54_t1.2	KRT7	1	3rd	Opal 620	0.00313	2388756	1
Pt54_t1.2	CDH1	1	4th	Opal 690	3.27574	2388756	1
Pt54_t1.2	KRT20	2	1st	Opal 620	4.12984	3001453	1
Pt54_t1.2	UGT1A	2	2nd	Opal 690	3.88899	3001453	1
Pt54_t1.2	ABCG2	2	3rd	Opal 520	1.72214	3001453	1
Pt54_t1.2	KI67	3	1st	Opal 520	1.2316	2587939	1
Pt54_t1.2	UGT1A	3	2nd	Opal 620	4.00745	2587939	1
Pt54_t1.2	HSF1	3	3rd	Opal 690	4.43441	2587939	1
Pt54_t1.2	RIPK1	4	1st	Opal 520	1.9721	2115467	1
Pt54_t1.2	RCC2	4	2nd	Opal 570	2.82327	2115467	1
Pt54_t1.2	TP53	4	3rd	Opal 690	1.13906	2115467	1
Pt54_t1.2	CFTR	5	1st	Opal 620	0.747255	3869269	1
Pt54_t1.2	ABCB1	5	2nd	Opal 690	0.8022	3869269	1
Pt54_t1.2	ERBB2	5	3rd	Opal 520	0.433869	3869269	1
Pt54.2_t1	KRT20	1	1st	Opal 520	0.039223	787428	1
Pt54.2_t1	CDX2	1	2nd	Opal 570	0.18882	787428	1
Pt54.2_t1	KRT7	1	3rd	Opal 620	0.006082	787428	1
Pt54.2_t1	CDH1	1	4th	Opal 690	3.76199	787428	1
Pt54.2_t1	KRT20	2	1st	Opal 620	0.782914	1015636	1
Pt54.2_t1	UGT1A	2	2nd	Opal 690	0.158596	1015636	1
Pt54.2_t1	ABCG2	2	3rd	Opal 520	0.248235	1015636	1
Pt54.2_t1	KI67	3	1st	Opal 520	3.20261	1003597	1
Pt54.2_t1	UGT1A	3	2nd	Opal 620	0.307816	1003597	1
Pt54.2_t1	HSF1	3	3rd	Opal 690	3.85585	1003597	1
Pt54.2_t1	RIPK1	4	1st	Opal 520	0.849832	832556	1
Pt54.2_t1	RCC2	4	2nd	Opal 570	0.41733	832556	1
Pt54.2_t1	TP53	4	3rd	Opal 690	0.72721	832556	1
Pt54.2_t1	CFTR	5	1st	Opal 620	0.422633	830358	1
Pt54.2_t1	ABCB1	5	2nd	Opal 690	0.737239	830358	1
Pt54.2_t1	ERBB2	5	3rd	Opal 520	0.069483	830358	1
Pt54.2_t2	KRT20	1	1st	Opal 520	0.029063	1642912	1
Pt54.2_t2	CDX2	1	2nd	Opal 570	0.188912	1642912	1
Pt54.2_t2	KRT7	1	3rd	Opal 620	0.002387	1642912	1
Pt54.2_t2	CDH1	1	4th	Opal 690	4.13351	1642912	1
Pt54.2_t2	KRT20	2	1st	Opal 620	0.411615	1609217	1
Pt54.2_t2	UGT1A	2	2nd	Opal 690	1.10603	1609217	1
Pt54.2_t2	ABCG2	2	3rd	Opal 520	0.329664	1609217	1
Pt54.2_t2	KI67	3	1st	Opal 520	2.20423	2457293	1
Pt54.2_t2	UGT1A	3	2nd	Opal 620	0.666128	2457293	1
Pt54.2_t2	HSF1	3	3rd	Opal 690	4.20069	2457293	1
Pt54.2_t2	RIPK1	4	1st	Opal 520	1.02335	1943177	1
Pt54.2_t2	RCC2	4	2nd	Opal 570	4.53658	1943177	1
Pt54.2_t2	TP53	4	3rd	Opal 690	1.27746	1943177	1
Pt54.2_t2	CFTR	5	1st	Opal 620	1.56352	2615530	1
Pt54.2_t2	ABCB1	5	2nd	Opal 690	0.769388	2615530	1
Pt54.2_t2	ERBB2	5	3rd	Opal 520	0.170711	2615530	1
Pt54.2_t3	KRT20	1	1st	Opal 520	0.055222	1165804	1
Pt54.2_t3	CDX2	1	2nd	Opal 570	0.416259	1165804	1
Pt54.2_t3	KRT7	1	3rd	Opal 620	0.002115	1165804	1
Pt54.2_t3	CDH1	1	4th	Opal 690	5.05423	1165804	1
Pt54.2_t3	KRT20	2	1st	Opal 620	2.29652	4216307	1
Pt54.2_t3	UGT1A	2	2nd	Opal 690	1.04598	4216307	1
Pt54.2_t3	ABCG2	2	3rd	Opal 520	1.08877	4216307	1
Pt54.2_t3	KI67	3	1st	Opal 520	1.96775	1616538	1
Pt54.2_t3	UGT1A	3	2nd	Opal 620	0.796818	1616538	1
Pt54.2_t3	HSF1	3	3rd	Opal 690	5.53887	1616538	1
Pt54.2_t3	RIPK1	4	1st	Opal 520	0.848106	1372924	1
Pt54.2_t3	RCC2	4	2nd	Opal 570	3.27487	1372924	1
Pt54.2_t3	TP53	4	3rd	Opal 690	1.37979	1372924	1
Pt54.2_t3	CFTR	5	1st	Opal 620	0.583554	3142157	1
Pt54.2_t3	ABCB1	5	2nd	Opal 690	0.90941	3142157	1
Pt54.2_t3	ERBB2	5	3rd	Opal 520	0.189709	3142157	1
Pt54.2_t4	KRT20	1	1st	Opal 520	0.044329	2350216	1
Pt54.2_t4	CDX2	1	2nd	Opal 570	0.732291	2350216	1
Pt54.2_t4	KRT7	1	3rd	Opal 620	0.001758	2350216	1
Pt54.2_t4	CDH1	1	4th	Opal 690	5.16485	2350216	1
Pt54.2_t4	KRT20	2	1st	Opal 620	2.13035	3717042	1
Pt54.2_t4	UGT1A	2	2nd	Opal 690	0.976959	3717042	1
Pt54.2_t4	ABCG2	2	3rd	Opal 520	1.29553	3717042	1
Pt54.2_t4	KI67	3	1st	Opal 520	2.41113	2455438	1
Pt54.2_t4	UGT1A	3	2nd	Opal 620	0.629287	2455438	1
Pt54.2_t4	HSF1	3	3rd	Opal 690	5.38144	2455438	1
Pt54.2_t4	RIPK1	4	1st	Opal 520	1.73192	3294990	1
Pt54.2_t4	RCC2	4	2nd	Opal 570	3.14115	3294990	1
Pt54.2_t4	TP53	4	3rd	Opal 690	1.72341	3294990	1
Pt54.2_t4	CFTR	5	1st	Opal 620	0.546184	4258100	1
Pt54.2_t4	ABCB1	5	2nd	Opal 690	1.6868	4258100	1
Pt54.2_t4	ERBB2	5	3rd	Opal 520	0.233937	4258100	1
Pt54.3_t1	KRT20	1	1st	Opal 520	0.12869	1210600	1
Pt54.3_t1	CDX2	1	2nd	Opal 570	0.728969	1210600	1
Pt54.3_t1	KRT7	1	3rd	Opal 620	0.006004	1210600	1
Pt54.3_t1	CDH1	1	4th	Opal 690	5.62333	1210600	1
Pt54.3_t1	KRT20	2	1st	Opal 620	2.75426	1142082	1
Pt54.3_t1	UGT1A	2	2nd	Opal 690	1.69199	1142082	1
Pt54.3_t1	ABCG2	2	3rd	Opal 520	0.556578	1142082	1
Pt54.3_t1	KI67	3	1st	Opal 520	2.78356	557339	1
Pt54.3_t1	UGT1A	3	2nd	Opal 620	0.739805	557339	1
Pt54.3_t1	HSF1	3	3rd	Opal 690	2.40119	557339	1
Pt54.3_t1	RIPK1	4	1st	Opal 520	1.89853	1160707	1
Pt54.3_t1	RCC2	4	2nd	Opal 570	4.15016	1160707	1
Pt54.3_t1	TP53	4	3rd	Opal 690	1.8984	1160707	1
Pt54.3_t1	CFTR	5	1st	Opal 620	0.743671	1629634	1
Pt54.3_t1	ABCB1	5	2nd	Opal 690	1.80654	1629634	1
Pt54.3_t1	ERBB2	5	3rd	Opal 520	0.108749	1629634	1
Pt55_t1	KRT20	1	1st	Opal 520	0.246733	2631120	5
Pt55_t1	CDX2	1	2nd	Opal 570	3.71179	2631120	5
Pt55_t1	KRT7	1	3rd	Opal 620	0.101178	2631120	5
Pt55_t1	CDH1	1	4th	Opal 690	3.92702	2631120	5
Pt55_t1	KRT20	2	1st	Opal 620	2.02126	2313888	5
Pt55_t1	UGT1A	2	2nd	Opal 690	2.21341	2313888	5
Pt55_t1	ABCG2	2	3rd	Opal 520	0.283546	2313888	5
Pt55_t1	KI67	3	1st	Opal 520	2.76519	2439233	5
Pt55_t1	UGT1A	3	2nd	Opal 620	1.7216	2439233	5
Pt55_t1	HSF1	3	3rd	Opal 690	5.25812	2439233	5
Pt55_t1	RIPK1	4	1st	Opal 520	0.87475	2430278	5
Pt55_t1	RCC2	4	2nd	Opal 570	2.91898	2430278	5
Pt55_t1	TP53	4	3rd	Opal 690	2.96605	2430278	5
Pt55_t1	CFTR	5	1st	Opal 620	0.946547	3172195	5
Pt55_t1	ABCB1	5	2nd	Opal 690	0.594894	3172195	5
Pt55_t1	ERBB2	5	3rd	Opal 520	0.12015	3172195	5
Pt55_t2	KRT20	1	1st	Opal 520	0.198738	1238368	5
Pt55_t2	CDX2	1	2nd	Opal 570	4.36182	1238368	5
Pt55_t2	KRT7	1	3rd	Opal 620	0.110594	1238368	5
Pt55_t2	CDH1	1	4th	Opal 690	3.58971	1238368	5
Pt55_t2	KRT20	2	1st	Opal 620	2.56646	1340828	5
Pt55_t2	UGT1A	2	2nd	Opal 690	1.9723	1340828	5
Pt55_t2	ABCG2	2	3rd	Opal 520	0.495916	1340828	5
Pt55_t2	KI67	3	1st	Opal 520	1.40975	1078187	5
Pt55_t2	UGT1A	3	2nd	Opal 620	1.3835	1078187	5
Pt55_t2	HSF1	3	3rd	Opal 690	6.66938	1078187	5
Pt55_t2	RIPK1	4	1st	Opal 520	0.510189	1025468	5
Pt55_t2	RCC2	4	2nd	Opal 570	1.6529	1025468	5
Pt55_t2	TP53	4	3rd	Opal 690	4.05238	1025468	5
Pt55_t2	CFTR	5	1st	Opal 620	0.501253	1150421	5
Pt55_t2	ABCB1	5	2nd	Opal 690	0.535974	1150421	5
Pt55_t2	ERBB2	5	3rd	Opal 520	0.112973	1150421	5
Pt55.3_t1	KRT20	1	1st	Opal 520	0.464261	2401616	5
Pt55.3_t1	CDX2	1	2nd	Opal 570	1.19392	2401616	5
Pt55.3_t1	KRT7	1	3rd	Opal 620	0.0345012	2401616	5
Pt55.3_t1	CDH1	1	4th	Opal 690	6.79979	2401616	5
Pt55.3_t1	KRT20	2	1st	Opal 620	2.53502	3425022	5
Pt55.3_t1	UGT1A	2	2nd	Opal 690	0.851861	3425022	5
Pt55.3_t1	ABCG2	2	3rd	Opal 520	1.48705	3425022	5
Pt55.3_t1	KI67	3	1st	Opal 520	1.95698	2141617	5
Pt55.3_t1	UGT1A	3	2nd	Opal 620	1.31789	2141617	5
Pt55.3_t1	HSF1	3	3rd	Opal 690	5.52761	2141617	5
Pt55.3_t1	RIPK1	4	1st	Opal 520	0.72141	2501083	5
Pt55.3_t1	RCC2	4	2nd	Opal 570	2.32534	2501083	5
Pt55.3_t1	TP53	4	3rd	Opal 690	2.9816	2501083	5
Pt55.3_t1	CFTR	5	1st	Opal 620	0.526975	2210479	5
Pt55.3_t1	ABCB1	5	2nd	Opal 690	0.68176	2210479	5
Pt55.3_t1	ERBB2	5	3rd	Opal 520	0.0603748	2210479	5
Pt56_t1	KRT20	1	1st	Opal 520	0.432204	1112340	5
Pt56_t1	CDX2	1	2nd	Opal 570	0.872467	1112340	5
Pt56_t1	KRT7	1	3rd	Opal 620	0.066066	1112340	5
Pt56_t1	CDH1	1	4th	Opal 690	8.98119	1112340	5
Pt56_t1	KRT20	2	1st	Opal 620	1.8285	1428049	5
Pt56_t1	UGT1A	2	2nd	Opal 690	0.16418	1428049	5
Pt56_t1	ABCG2	2	3rd	Opal 520	0.194829	1428049	5
Pt56_t1	KI67	3	1st	Opal 520	2.87999	781631	5
Pt56_t1	UGT1A	3	2nd	Opal 620	0.103024	781631	5
Pt56_t1	HSF1	3	3rd	Opal 690	6.14081	781631	5
Pt56_t1	RIPK1	4	1st	Opal 520	1.06892	930680	5
Pt56_t1	RCC2	4	2nd	Opal 570	0.991628	930680	5
Pt56_t1	TP53	4	3rd	Opal 690	2.13606	930680	5
Pt56_t1	CFTR	5	1st	Opal 620	0.284156	1175402	5
Pt56_t1	ABCB1	5	2nd	Opal 690	0.930488	1175402	5
Pt56_t1	ERBB2	5	3rd	Opal 520	0.02374	1175402	5
Pt56_t4	KRT20	1	1st	Opal 520	0.335446	370500	5
Pt56_t4	CDX2	1	2nd	Opal 570	1.1108	370500	5
Pt56_t4	KRT7	1	3rd	Opal 620	0.075918	370500	5
Pt56_t4	CDH1	1	4th	Opal 690	7.1765	370500	5
Pt56_t4	KRT20	2	1st	Opal 620	1.51223	439766	5
Pt56_t4	UGT1A	2	2nd	Opal 690	0.05638	439766	5
Pt56_t4	ABCG2	2	3rd	Opal 520	0.0672944	439766	5
Pt56_t4	KI67	3	1st	Opal 520	2.90157	429073	5
Pt56_t4	UGT1A	3	2nd	Opal 620	0.00320683	429073	5
Pt56_t4	HSF1	3	3rd	Opal 690	2.06487	429073	5
Pt56_t4	RIPK1	4	1st	Opal 520	0.211894	320370	5
Pt56_t4	RCC2	4	2nd	Opal 570	0.28781	320370	5
Pt56_t4	TP53	4	3rd	Opal 690	2.13223	320370	5
Pt56_t4	CFTR	5	1st	Opal 620	0.327592	378700	5
Pt56_t4	ABCB1	5	2nd	Opal 690	0.143418	378700	5
Pt56_t4	ERBB2	5	3rd	Opal 520	0.0153825	378700	5
Pt62_t1	KRT20	1	1st	Opal 520	0.224965	525292	6
Pt62_t1	CDX2	1	2nd	Opal 570	0.952109	525292	6
Pt62_t1	KRT7	1	3rd	Opal 620	0.07842	525292	6
Pt62_t1	CDH1	1	4th	Opal 690	5.25455	525292	6
Pt62_t1	KRT20	2	1st	Opal 620	1.98738	735738	6
Pt62_t1	UGT1A	2	2nd	Opal 690	1.25808	735738	6
Pt62_t1	ABCG2	2	3rd	Opal 520	0.240722	735738	6
Pt62_t1	KI67	3	1st	Opal 520	3.05254	667329	6
Pt62_t1	UGT1A	3	2nd	Opal 620	3.62824	667329	6
Pt62_t1	HSF1	3	3rd	Opal 690	0.744105	667329	6
Pt62_t1	RIPK1	4	1st	Opal 520	2.15036	386995	6
Pt62_t1	RCC2	4	2nd	Opal 570	4.89642	386995	6
Pt62_t1	TP53	4	3rd	Opal 690	0.220004	386995	6
Pt62_t1	CFTR	5	1st	Opal 620	1.82447	706437	6
Pt62_t1	ABCB1	5	2nd	Opal 690	0.470378	706437	6
Pt62_t1	ERBB2	5	3rd	Opal 520	0.0488612	706437	6
Pt62_t2	KRT20	1	1st	Opal 520	0.362364	1242844	6
Pt62_t2	CDX2	1	2nd	Opal 570	1.56291	1242844	6
Pt62_t2	KRT7	1	3rd	Opal 620	0.088532	1242844	6
Pt62_t2	CDH1	1	4th	Opal 690	7.21949	1242844	6
Pt62_t2	KRT20	2	1st	Opal 620	2.26574	1215223	6
Pt62_t2	UGT1A	2	2nd	Opal 690	0.716818	1215223	6
Pt62_t2	ABCG2	2	3rd	Opal 520	0.199294	1215223	6
Pt62_t2	KI67	3	1st	Opal 520	3.71618	1104352	6
Pt62_t2	UGT1A	3	2nd	Opal 620	1.88358	1104352	6
Pt62_t2	HSF1	3	3rd	Opal 690	6.01097	1104352	6
Pt62_t2	RIPK1	4	1st	Opal 520	2.79297	999713	6
Pt62_t2	RCC2	4	2nd	Opal 570	4.79551	999713	6
Pt62_t2	TP53	4	3rd	Opal 690	0.794563	999713	6
Pt62_t2	CFTR	5	1st	Opal 620	1.25437	1110177	6
Pt62_t2	ABCB1	5	2nd	Opal 690	1.04682	1110177	6
Pt62_t2	ERBB2	5	3rd	Opal 520	0.227254	1110177	6
Pt59_t1	KRT20	1	1st	Opal 520	0.085041	906800	5
Pt59_t1	CDX2	1	2nd	Opal 570	0.461182	906800	5
Pt59_t1	KRT7	1	3rd	Opal 620	0.032429	906800	5
Pt59_t1	CDH1	1	4th	Opal 690	4.89351	906800	5
Pt59_t1	KRT20	2	1st	Opal 620	0.560867	1225368	5
Pt59_t1	UGT1A	2	2nd	Opal 690	0.857898	1225368	5
Pt59_t1	ABCG2	2	3rd	Opal 520	0.298055	1225368	5
Pt59_t1	KI67	3	1st	Opal 520	1.17422	817039	5
Pt59_t1	UGT1A	3	2nd	Opal 620	1.32418	817039	5
Pt59_t1	HSF1	3	3rd	Opal 690	6.42925	817039	5
Pt59_t1	RIPK1	4	1st	Opal 520	0.782687	827308	5
Pt59_t1	RCC2	4	2nd	Opal 570	3.18844	827308	5
Pt59_t1	TP53	4	3rd	Opal 690	0.185389	827308	5
Pt59_t1	CFTR	5	1st	Opal 620	0.464737	1275149	5
Pt59_t1	ABCB1	5	2nd	Opal 690	2.21597	1275149	5
Pt59_t1	ERBB2	5	3rd	Opal 520	0.0905447	1275149	5
Pt59_t2	KRT20	1	1st	Opal 520	0.098882	635400	5
Pt59_t2	CDX2	1	2nd	Opal 570	0.921475	635400	5
Pt59_t2	KRT7	1	3rd	Opal 620	0.029349	635400	5
Pt59_t2	CDH1	1	4th	Opal 690	5.25067	635400	5
Pt59_t2	KRT20	2	1st	Opal 620	0.959392	803715	5
Pt59_t2	UGT1A	2	2nd	Opal 690	0.773327	803715	5
Pt59_t2	ABCG2	2	3rd	Opal 520	0.284579	803715	5
Pt59_t2	KI67	3	1st	Opal 520	2.06859	743937	5
Pt59_t2	UGT1A	3	2nd	Opal 620	1.03919	743937	5
Pt59_t2	HSF1	3	3rd	Opal 690	5.63303	743937	5
Pt59_t2	RIPK1	4	1st	Opal 520	1.01231	709585	5
Pt59_t2	RCC2	4	2nd	Opal 570	1.85784	709585	5
Pt59_t2	TP53	4	3rd	Opal 690	1.53484	709585	5
Pt59_t2	CFTR	5	1st	Opal 620	0.637374	981582	5
Pt59_t2	ABCB1	5	2nd	Opal 690	0.502851	981582	5
Pt59_t2	ERBB2	5	3rd	Opal 520	0.0410787	981582	5
Pt59_t3	KRT20	1	1st	Opal 520	0.125903	149669	5
Pt59_t3	CDX2	1	2nd	Opal 570	0.555285	149669	5
Pt59_t3	KRT7	1	3rd	Opal 620	0.018714	149669	5
Pt59_t3	CDH1	1	4th	Opal 690	3.09295	149669	5
Pt59_t3	KRT20	2	1st	Opal 620	1.30604	329485	5
Pt59_t3	UGT1A	2	2nd	Opal 690	0.891932	329485	5
Pt59_t3	ABCG2	2	3rd	Opal 520	0.24274	329485	5
Pt59_t3	KI67	3	1st	Opal 520	1.01383	190248	5
Pt59_t3	UGT1A	3	2nd	Opal 620	0.552382	190248	5
Pt59_t3	HSF1	3	3rd	Opal 690	4.5029	190248	5
Pt59_t3	RIPK1	4	1st	Opal 520	0.884342	181264	5
Pt59_t3	RCC2	4	2nd	Opal 570	0.124522	181264	5
Pt59_t3	TP53	4	3rd	Opal 690	0.417477	181264	5
Pt59_t3	CFTR	5	1st	Opal 620	0.58808	317280	5
Pt59_t3	ABCB1	5	2nd	Opal 690	1.52918	317280	5
Pt59_t3	ERBB2	5	3rd	Opal 520	0.0626714	317280	5
Pt58_t1	KRT20	1	1st	Opal 520	0.354953	1032068	5
Pt58_t1	CDX2	1	2nd	Opal 570	1.01655	1032068	5
Pt58_t1	KRT7	1	3rd	Opal 620	0.045634	1032068	5
Pt58_t1	CDH1	1	4th	Opal 690	3.4709	1032068	5
Pt58_t1	KRT20	2	1st	Opal 620	3.60934	2103357	5
Pt58_t1	UGT1A	2	2nd	Opal 690	0.820387	2103357	5
Pt58_t1	ABCG2	2	3rd	Opal 520	0.307257	2103357	5
Pt58_t1	KI67	3	1st	Opal 520	3.19885	1512346	5
Pt58_t1	UGT1A	3	2nd	Opal 620	1.08694	1512346	5
Pt58_t1	HSF1	3	3rd	Opal 690	4.5833	1512346	5
Pt58_t1	RIPK1	4	1st	Opal 520	0.638827	1245078	5
Pt58_t1	RCC2	4	2nd	Opal 570	1.96035	1245078	5
Pt58_t1	TP53	4	3rd	Opal 690	3.02129	1245078	5
Pt58_t1	CFTR	5	1st	Opal 620	0.572494	1659745	5
Pt58_t1	ABCB1	5	2nd	Opal 690	1.17487	1659745	5
Pt58_t1	ERBB2	5	3rd	Opal 520	0.0562849	1659745	5
Pt58_t2	KRT20	1	1st	Opal 520	0.27137	1112184	5
Pt58_t2	CDX2	1	2nd	Opal 570	3.38367	1112184	5
Pt58_t2	KRT7	1	3rd	Opal 620	0.116588	1112184	5
Pt58_t2	CDH1	1	4th	Opal 690	6.58087	1112184	5
Pt58_t2	KRT20	2	1st	Opal 620	2.74979	2240725	5
Pt58_t2	UGT1A	2	2nd	Opal 690	1.45879	2240725	5
Pt58_t2	ABCG2	2	3rd	Opal 520	0.625567	2240725	5
Pt58_t2	KI67	3	1st	Opal 520	4.20841	1102730	5
Pt58_t2	UGT1A	3	2nd	Opal 620	2.21752	1102730	5
Pt58_t2	HSF1	3	3rd	Opal 690	6.12909	1102730	5
Pt58_t2	RIPK1	4	1st	Opal 520	2.15345	1169147	5
Pt58_t2	RCC2	4	2nd	Opal 570	2.18963	1169147	5
Pt58_t2	TP53	4	3rd	Opal 690	4.61779	1169147	5
Pt58_t2	CFTR	5	1st	Opal 620	1.55252	2152281	5
Pt58_t2	ABCB1	5	2nd	Opal 690	1.2904	2152281	5
Pt58_t2	ERBB2	5	3rd	Opal 520	0.0849674	2152281	5
Pt57_t2	KRT20	1	1st	Opal 520	1.0405	330510	6
Pt57_t2	CDX2	1	2nd	Opal 570	1.16574	330510	6
Pt57_t2	KRT7	1	3rd	Opal 620	0.005607	330510	6
Pt57_t2	CDH1	1	4th	Opal 690	3.15501	330510	6
Pt57_t2	KRT20	2	1st	Opal 620	3.87561	1125977	6
Pt57_t2	UGT1A	2	2nd	Opal 690	1.44676	1125977	6
Pt57_t2	ABCG2	2	3rd	Opal 520	1.20673	1125977	6
Pt57_t2	KI67	3	1st	Opal 520	3.4564	326197	6
Pt57_t2	UGT1A	3	2nd	Opal 620	0.165175	326197	6
Pt57_t2	HSF1	3	3rd	Opal 690	5.24364	326197	6
Pt57_t2	RIPK1	4	1st	Opal 520	1.34413	340740	6
Pt57_t2	RCC2	4	2nd	Opal 570	6.01577	340740	6
Pt57_t2	TP53	4	3rd	Opal 690	2.11564	340740	6
Pt57_t2	CFTR	5	1st	Opal 620	0.975481	565645	6
Pt57_t2	ABCB1	5	2nd	Opal 690	1.91168	565645	6
Pt57_t2	ERBB2	5	3rd	Opal 520	0.340851	565645	6
Pt61_t2	KRT20	1	1st	Opal 520	0.281809	2015023	6
Pt61_t2	CDX2	1	2nd	Opal 570	3.67379	2015023	6
Pt61_t2	KRT7	1	3rd	Opal 620	0.08366	2015023	6
Pt61_t2	CDH1	1	4th	Opal 690	5.23904	2015023	6
Pt61_t2	KRT20	2	1st	Opal 620	0.668879	2284782	6
Pt61_t2	UGT1A	2	2nd	Opal 690	0.0657638	2284782	6
Pt61_t2	ABCG2	2	3rd	Opal 520	0.225419	2284782	6
Pt61_t2	KI67	3	1st	Opal 520	3.42543	2181710	6
Pt61_t2	UGT1A	3	2nd	Opal 620	0.197667	2181710	6
Pt61_t2	HSF1	3	3rd	Opal 690	6.48628	2181710	6
Pt61_t2	RIPK1	4	1st	Opal 520	1.42044	1985617	6
Pt61_t2	RCC2	4	2nd	Opal 570	6.36164	1985617	6
Pt61_t2	TP53	4	3rd	Opal 690	0.121328	1985617	6
Pt61_t2	CFTR	5	1st	Opal 620	0.426571	2329117	6
Pt61_t2	ABCB1	5	2nd	Opal 690	1.82581	2329117	6
Pt61_t2	ERBB2	5	3rd	Opal 520	0.114378	2329117	6
Pt81_t1	KRT20	1	1st	Opal 520	0.040129	2195448	7
Pt81_t1	CDX2	1	2nd	Opal 570	4.77721	2195448	7
Pt81_t1	KRT7	1	3rd	Opal 620	0.080196	2195448	7
Pt81_t1	CDH1	1	4th	Opal 690	5.71422	2195448	7
Pt81_t1	KRT20	2	1st	Opal 620	0.933467	2040813	7
Pt81_t1	UGT1A	2	2nd	Opal 690	1.13183	2040813	7
Pt81_t1	ABCG2	2	3rd	Opal 520	0.282173	2040813	7
Pt81_t1	KI67	3	1st	Opal 520	2.44877	1959289	7
Pt81_t1	UGT1A	3	2nd	Opal 620	0.971157	1959289	7
Pt81_t1	HSF1	3	3rd	Opal 690	4.17932	1959289	7
Pt81_t1	RIPK1	4	1st	Opal 520	0.714876	1306280	7
Pt81_t1	RCC2	4	2nd	Opal 570	2.30664	1306280	7
Pt81_t1	TP53	4	3rd	Opal 690	4.27877	1306280	7
Pt81_t1	CFTR	5	1st	Opal 620	1.10977	1423342	7
Pt81_t1	ABCB1	5	2nd	Opal 690	2.82029	1423342	7
Pt81_t1	ERBB2	5	3rd	Opal 520	0.107818	1423342	7
Pt81_t2	KRT20	1	1st	Opal 520	0.015318	1644590	7
Pt81_t2	CDX2	1	2nd	Opal 570	5.32822	1644590	7
Pt81_t2	KRT7	1	3rd	Opal 620	0.081677	1644590	7
Pt81_t2	CDH1	1	4th	Opal 690	5.64595	1644590	7
Pt81_t2	KRT20	2	1st	Opal 620	0.639038	1447158	7
Pt81_t2	UGT1A	2	2nd	Opal 690	0.852066	1447158	7
Pt81_t2	ABCG2	2	3rd	Opal 520	0.241079	1447158	7
Pt81_t2	KI67	3	1st	Opal 520	2.34644	1272349	7
Pt81_t2	UGT1A	3	2nd	Opal 620	1.28824	1272349	7
Pt81_t2	HSF1	3	3rd	Opal 690	4.20397	1272349	7
Pt81_t2	RIPK1	4	1st	Opal 520	0.512904	851865	7
Pt81_t2	RCC2	4	2nd	Opal 570	1.54643	851865	7
Pt81_t2	TP53	4	3rd	Opal 690	3.90495	851865	7
Pt81_t2	CFTR	5	1st	Opal 620	0.741887	1064400	7
Pt81_t2	ABCB1	5	2nd	Opal 690	1.67828	1064400	7
Pt81_t2	ERBB2	5	3rd	Opal 520	0.052652	1064400	7
Pt65_t1	KRT20	1	1st	Opal 520	0.287205	1007140	6
Pt65_t1	CDX2	1	2nd	Opal 570	1.95862	1007140	6
Pt65_t1	KRT7	1	3rd	Opal 620	0.053581	1007140	6
Pt65_t1	CDH1	1	4th	Opal 690	5.90623	1007140	6
Pt65_t1	KRT20	2	1st	Opal 620	1.64566	1261798	6
Pt65_t1	UGT1A	2	2nd	Opal 690	0.149866	1261798	6
Pt65_t1	ABCG2	2	3rd	Opal 520	0.126638	1261798	6
Pt65_t1	KI67	3	1st	Opal 520	1.97472	1126425	6
Pt65_t1	UGT1A	3	2nd	Opal 620	0.130527	1126425	6
Pt65_t1	HSF1	3	3rd	Opal 690	3.85599	1126425	6
Pt65_t1	RIPK1	4	1st	Opal 520	0.277771	1014940	6
Pt65_t1	RCC2	4	2nd	Opal 570	1.55848	1014940	6
Pt65_t1	TP53	4	3rd	Opal 690	0.040335	1014940	6
Pt65_t1	CFTR	5	1st	Opal 620	0.260299	1620055	6
Pt65_t1	ABCB1	5	2nd	Opal 690	1.76513	1620055	6
Pt65_t1	ERBB2	5	3rd	Opal 520	0.116559	1620055	6
Pt66_t1	KRT20	1	1st	Opal 520	0.134632	1884306	6
Pt66_t1	CDX2	1	2nd	Opal 570	0.342853	1884306	6
Pt66_t1	KRT7	1	3rd	Opal 620	0.038385	1884306	6
Pt66_t1	CDH1	1	4th	Opal 690	7.00007	1884306	6
Pt66_t1	KRT20	2	1st	Opal 620	0.612231	2152116	6
Pt66_t1	UGT1A	2	2nd	Opal 690	0.172694	2152116	6
Pt66_t1	ABCG2	2	3rd	Opal 520	0.361423	2152116	6
Pt66_t1	KI67	3	1st	Opal 520	1.49291	2128322	6
Pt66_t1	UGT1A	3	2nd	Opal 620	0.153488	2128322	6
Pt66_t1	HSF1	3	3rd	Opal 690	4.70554	2128322	6
Pt66_t1	RIPK1	4	1st	Opal 520	1.34426	1691059	6
Pt66_t1	RCC2	4	2nd	Opal 570	5.7949	1691059	6
Pt66_t1	TP53	4	3rd	Opal 690	0.079078	1691059	6
Pt66_t1	CFTR	5	1st	Opal 620	0.632026	2065975	6
Pt66_t1	ABCB1	5	2nd	Opal 690	0.782675	2065975	6
Pt66_t1	ERBB2	5	3rd	Opal 520	0.128858	2065975	6
Pt66_t2	KRT20	1	1st	Opal 520	0.16337	1275952	6
Pt66_t2	CDX2	1	2nd	Opal 570	0.605145	1275952	6
Pt66_t2	KRT7	1	3rd	Opal 620	0.020826	1275952	6
Pt66_t2	CDH1	1	4th	Opal 690	5.82957	1275952	6
Pt66_t2	KRT20	2	1st	Opal 620	1.36818	1578824	6
Pt66_t2	UGT1A	2	2nd	Opal 690	0.222811	1578824	6
Pt66_t2	ABCG2	2	3rd	Opal 520	0.256355	1578824	6
Pt66_t2	KI67	3	1st	Opal 520	1.42098	1184059	6
Pt66_t2	UGT1A	3	2nd	Opal 620	0.327361	1184059	6
Pt66_t2	HSF1	3	3rd	Opal 690	7.54684	1184059	6
Pt66_t2	RIPK1	4	1st	Opal 520	3.3847	826163	6
Pt66_t2	RCC2	4	2nd	Opal 570	3.28251	826163	6
Pt66_t2	TP53	4	3rd	Opal 690	0.064906	826163	6
Pt66_t2	CFTR	5	1st	Opal 620	0.872874	1475876	6
Pt66_t2	ABCB1	5	2nd	Opal 690	1.73059	1475876	6
Pt66_t2	ERBB2	5	3rd	Opal 520	0.231609	1475876	6
Pt66_t3	KRT20	1	1st	Opal 520	0.101458	859976	6
Pt66_t3	CDX2	1	2nd	Opal 570	1.10953	859976	6
Pt66_t3	KRT7	1	3rd	Opal 620	0.038253	859976	6
Pt66_t3	CDH1	1	4th	Opal 690	6.5501	859976	6
Pt66_t3	KRT20	2	1st	Opal 620	1.0929	1033562	6
Pt66_t3	UGT1A	2	2nd	Opal 690	0.283385	1033562	6
Pt66_t3	ABCG2	2	3rd	Opal 520	0.278843	1033562	6
Pt66_t3	KI67	3	1st	Opal 520	2.20292	811914	6
Pt66_t3	UGT1A	3	2nd	Opal 620	0.325746	811914	6
Pt66_t3	HSF1	3	3rd	Opal 690	8.04686	811914	6
Pt66_t3	RIPK1	4	1st	Opal 520	3.65307	852700	6
Pt66_t3	RCC2	4	2nd	Opal 570	4.78329	852700	6
Pt66_t3	TP53	4	3rd	Opal 690	0.097889	852700	6
Pt66_t3	CFTR	5	1st	Opal 620	1.11737	966760	6
Pt66_t3	ABCB1	5	2nd	Opal 690	1.39065	966760	6
Pt66_t3	ERBB2	5	3rd	Opal 520	0.240237	966760	6
Pt80_t1	KRT20	1	1st	Opal 520	0.425715	1905632	7
Pt80_t1	CDX2	1	2nd	Opal 570	4.92034	1905632	7
Pt80_t1	KRT7	1	3rd	Opal 620	0.08915	1905632	7
Pt80_t1	CDH1	1	4th	Opal 690	5.26627	1905632	7
Pt80_t1	KRT20	2	1st	Opal 620	4.82102	2241609	7
Pt80_t1	UGT1A	2	2nd	Opal 690	0.579444	2241609	7
Pt80_t1	ABCG2	2	3rd	Opal 520	0.37966	2241609	7
Pt80_t1	KI67	3	1st	Opal 520	2.52775	1793632	7
Pt80_t1	UGT1A	3	2nd	Opal 620	0.269976	1793632	7
Pt80_t1	HSF1	3	3rd	Opal 690	4.69283	1793632	7
Pt80_t1	RIPK1	4	1st	Opal 520	0.992674	1620795	7
Pt80_t1	RCC2	4	2nd	Opal 570	3.86256	1620795	7
Pt80_t1	TP53	4	3rd	Opal 690	1.23777	1620795	7
Pt80_t1	CFTR	5	1st	Opal 620	0.952396	2462896	7
Pt80_t1	ABCB1	5	2nd	Opal 690	0.442037	2462896	7
Pt80_t1	ERBB2	5	3rd	Opal 520	0.26282	2462896	7
Pt67_t1	KRT20	1	1st	Opal 520	0.144368	27964	6
Pt67_t1	CDX2	1	2nd	Opal 570	0.26401	27964	6
Pt67_t1	KRT7	1	3rd	Opal 620	0.08583	27964	6
Pt67_t1	CDH1	1	4th	Opal 690	5.7408	27964	6
Pt67_t1	KRT20	2	1st	Opal 620	1.11364	220218	6
Pt67_t1	UGT1A	2	2nd	Opal 690	0.228023	220218	6
Pt67_t1	ABCG2	2	3rd	Opal 520	0.298682	220218	6
Pt67_t1	KI67	3	1st	Opal 520	2.99737	99217	6
Pt67_t1	UGT1A	3	2nd	Opal 620	0.111875	99217	6
Pt67_t1	HSF1	3	3rd	Opal 690	3.97879	99217	6
Pt67_t1	RIPK1	4	1st	Opal 520	0.846477	176740	6
Pt67_t1	RCC2	4	2nd	Opal 570	0.905292	176740	6
Pt67_t1	TP53	4	3rd	Opal 690	0.052112	176740	6
Pt67_t1	CFTR	5	1st	Opal 620	0.471665	239755	6
Pt67_t1	ABCB1	5	2nd	Opal 690	0.997205	239755	6
Pt67_t1	ERBB2	5	3rd	Opal 520	0.0475003	239755	6
Pt68_t1	KRT20	1	1st	Opal 520	0.379182	1007420	6
Pt68_t1	CDX2	1	2nd	Opal 570	0.140137	1007420	6
Pt68_t1	KRT7	1	3rd	Opal 620	0.018211	1007420	6
Pt68_t1	CDH1	1	4th	Opal 690	6.11982	1007420	6
Pt68_t1	KRT20	2	1st	Opal 620	1.78689	1143862	6
Pt68_t1	UGT1A	2	2nd	Opal 690	0.0945904	1143862	6
Pt68_t1	ABCG2	2	3rd	Opal 520	0.0967054	1143862	6
Pt68_t1	KI67	3	1st	Opal 520	2.66389	1044635	6
Pt68_t1	UGT1A	3	2nd	Opal 620	0.050971	1044635	6
Pt68_t1	HSF1	3	3rd	Opal 690	5.11306	1044635	6
Pt68_t1	RIPK1	4	1st	Opal 520	0.888098	1157122	6
Pt68_t1	RCC2	4	2nd	Opal 570	2.56837	1157122	6
Pt68_t1	TP53	4	3rd	Opal 690	0.048447	1157122	6
Pt68_t1	CFTR	5	1st	Opal 620	0.480387	1225161	6
Pt68_t1	ABCB1	5	2nd	Opal 690	0.979562	1225161	6
Pt68_t1	ERBB2	5	3rd	Opal 520	0.0842647	1225161	6
Pt70_t1	KRT20	1	1st	Opal 520	0.110592	1965400	6
Pt70_t1	CDX2	1	2nd	Opal 570	2.23899	1965400	6
Pt70_t1	KRT7	1	3rd	Opal 620	0.070675	1965400	6
Pt70_t1	CDH1	1	4th	Opal 690	7.76713	1965400	6
Pt70_t1	KRT20	2	1st	Opal 620	0.981514	2355518	6
Pt70_t1	UGT1A	2	2nd	Opal 690	0.0856973	2355518	6
Pt70_t1	ABCG2	2	3rd	Opal 520	0.106201	2355518	6
Pt70_t1	KI67	3	1st	Opal 520	3.17842	1890417	6
Pt70_t1	UGT1A	3	2nd	Opal 620	0.0389334	1890417	6
Pt70_t1	HSF1	3	3rd	Opal 690	5.12402	1890417	6
Pt70_t1	RIPK1	4	1st	Opal 520	1.95833	1584312	6
Pt70_t1	RCC2	4	2nd	Opal 570	3.80153	1584312	6
Pt70_t1	TP53	4	3rd	Opal 690	0.310352	1584312	6
Pt70_t1	CFTR	5	1st	Opal 620	1.0663	2572867	6
Pt70_t1	ABCB1	5	2nd	Opal 690	0.74242	2572867	6
Pt70_t1	ERBB2	5	3rd	Opal 520	0.241664	2572867	6
Pt74_t1	KRT20	1	1st	Opal 520	0.216542	653732	6
Pt74_t1	CDX2	1	2nd	Opal 570	0.96196	653732	6
Pt74_t1	KRT7	1	3rd	Opal 620	0.01463	653732	6
Pt74_t1	CDH1	1	4th	Opal 690	4.90824	653732	6
Pt74_t1	KRT20	2	1st	Opal 620	1.69403	628907	6
Pt74_t1	UGT1A	2	2nd	Opal 690	0.589946	628907	6
Pt74_t1	ABCG2	2	3rd	Opal 520	0.391709	628907	6
Pt74_t1	KI67	3	1st	Opal 520	5.94247	619762	6
Pt74_t1	UGT1A	3	2nd	Opal 620	0.553834	619762	6
Pt74_t1	HSF1	3	3rd	Opal 690	5.02591	619762	6
Pt74_t1	RIPK1	4	1st	Opal 520	0.87791	506136	6
Pt74_t1	RCC2	4	2nd	Opal 570	1.12281	506136	6
Pt74_t1	TP53	4	3rd	Opal 690	0.605523	506136	6
Pt74_t1	CFTR	5	1st	Opal 620	0.909224	707497	6
Pt74_t1	ABCB1	5	2nd	Opal 690	2.41926	707497	6
Pt74_t1	ERBB2	5	3rd	Opal 520	0.0796456	707497	6
Pt74_t2	KRT20	1	1st	Opal 520	0.116176	822984	6
Pt74_t2	CDX2	1	2nd	Opal 570	0.180962	822984	6
Pt74_t2	KRT7	1	3rd	Opal 620	0.02895	822984	6
Pt74_t2	CDH1	1	4th	Opal 690	5.20737	822984	6
Pt74_t2	KRT20	2	1st	Opal 620	0.825107	1251881	6
Pt74_t2	UGT1A	2	2nd	Opal 690	0.122177	1251881	6
Pt74_t2	ABCG2	2	3rd	Opal 520	0.316361	1251881	6
Pt74_t2	KI67	3	1st	Opal 520	4.19805	1194511	6
Pt74_t2	UGT1A	3	2nd	Opal 620	0.208228	1194511	6
Pt74_t2	HSF1	3	3rd	Opal 690	3.99187	1194511	6
Pt74_t2	RIPK1	4	1st	Opal 520	0.820219	895369	6
Pt74_t2	RCC2	4	2nd	Opal 570	3.4502	895369	6
Pt74_t2	TP53	4	3rd	Opal 690	2.3529	895369	6
Pt74_t2	CFTR	5	1st	Opal 620	0.685158	1358582	6
Pt74_t2	ABCB1	5	2nd	Opal 690	2.21663	1358582	6
Pt74_t2	ERBB2	5	3rd	Opal 520	0.0791647	1358582	6
Pt74_t3	KRT20	1	1st	Opal 520	0.053738	1631840	6
Pt74_t3	CDX2	1	2nd	Opal 570	0.232856	1631840	6
Pt74_t3	KRT7	1	3rd	Opal 620	0.014881	1631840	6
Pt74_t3	CDH1	1	4th	Opal 690	4.91505	1631840	6
Pt74_t3	KRT20	2	1st	Opal 620	0.439468	3063950	6
Pt74_t3	UGT1A	2	2nd	Opal 690	0.297598	3063950	6
Pt74_t3	ABCG2	2	3rd	Opal 520	0.548642	3063950	6
Pt74_t3	KI67	3	1st	Opal 520	3.97639	2362630	6
Pt74_t3	UGT1A	3	2nd	Opal 620	0.302043	2362630	6
Pt74_t3	HSF1	3	3rd	Opal 690	4.02719	2362630	6
Pt74_t3	RIPK1	4	1st	Opal 520	1.39101	1972643	6
Pt74_t3	RCC2	4	2nd	Opal 570	2.06916	1972643	6
Pt74_t3	TP53	4	3rd	Opal 690	1.64305	1972643	6
Pt74_t3	CFTR	5	1st	Opal 620	0.600907	3434022	6
Pt74_t3	ABCB1	5	2nd	Opal 690	2.07215	3434022	6
Pt74_t3	ERBB2	5	3rd	Opal 520	0.0811072	3434022	6
Pt74_t4	KRT20	1	1st	Opal 520	0.07011	1844120	6
Pt74_t4	CDX2	1	2nd	Opal 570	0.27326	1844120	6
Pt74_t4	KRT7	1	3rd	Opal 620	0.016405	1844120	6
Pt74_t4	CDH1	1	4th	Opal 690	6.03348	1844120	6
Pt74_t4	KRT20	2	1st	Opal 620	0.66544	3447360	6
Pt74_t4	UGT1A	2	2nd	Opal 690	0.160375	3447360	6
Pt74_t4	ABCG2	2	3rd	Opal 520	0.579003	3447360	6
Pt74_t4	KI67	3	1st	Opal 520	4.57879	1766731	6
Pt74_t4	UGT1A	3	2nd	Opal 620	0.10213	1766731	6
Pt74_t4	HSF1	3	3rd	Opal 690	4.35812	1766731	6
Pt74_t4	RIPK1	4	1st	Opal 520	1.89978	1900549	6
Pt74_t4	RCC2	4	2nd	Opal 570	2.52557	1900549	6
Pt74_t4	TP53	4	3rd	Opal 690	2.19709	1900549	6
Pt74_t4	CFTR	5	1st	Opal 620	0.883088	2685951	6
Pt74_t4	ABCB1	5	2nd	Opal 690	2.24474	2685951	6
Pt74_t4	ERBB2	5	3rd	Opal 520	0.0855786	2685951	6
Pt79_t1	KRT20	1	1st	Opal 520	0.068753	1733560	7
Pt79_t1	CDX2	1	2nd	Opal 570	0.29833	1733560	7
Pt79_t1	KRT7	1	3rd	Opal 620	0.006167	1733560	7
Pt79_t1	CDH1	1	4th	Opal 690	5.85305	1733560	7
Pt79_t1	KRT20	2	1st	Opal 620	1.68672	3332762	7
Pt79_t1	UGT1A	2	2nd	Opal 690	1.09258	3332762	7
Pt79_t1	ABCG2	2	3rd	Opal 520	0.891365	3332762	7
Pt79_t1	KI67	3	1st	Opal 520	3.86859	1554813	7
Pt79_t1	UGT1A	3	2nd	Opal 620	2.0503	1554813	7
Pt79_t1	HSF1	3	3rd	Opal 690	1.32767	1554813	7
Pt79_t1	RIPK1	4	1st	Opal 520	1.63848	1633400	7
Pt79_t1	RCC2	4	2nd	Opal 570	0.929954	1633400	7
Pt79_t1	TP53	4	3rd	Opal 690	1.96683	1633400	7
Pt79_t1	CFTR	5	1st	Opal 620	0.755137	2716559	7
Pt79_t1	ABCB1	5	2nd	Opal 690	3.02853	2716559	7
Pt79_t1	ERBB2	5	3rd	Opal 520	0.0775067	2716559	7
Pt79_t2	KRT20	1	1st	Opal 520	0.007667	60600	7
Pt79_t2	CDX2	1	2nd	Opal 570	0.030889	60600	7
Pt79_t2	KRT7	1	3rd	Opal 620	0.006439	60600	7
Pt79_t2	CDH1	1	4th	Opal 690	2.77593	60600	7
Pt79_t2	KRT20	2	1st	Opal 620	0.20878	31454	7
Pt79_t2	UGT1A	2	2nd	Opal 690	0.0693584	31454	7
Pt79_t2	ABCG2	2	3rd	Opal 520	0.0962082	31454	7
Pt79_t2	KI67	3	1st	Opal 520	3.31448	39614	7
Pt79_t2	UGT1A	3	2nd	Opal 620	0.165776	39614	7
Pt79_t2	HSF1	3	3rd	Opal 690	4.75096	39614	7
Pt79_t2	RIPK1	4	1st	Opal 520	0.610011	9936	7
Pt79_t2	RCC2	4	2nd	Opal 570	0.045709	9936	7
Pt79_t2	TP53	4	3rd	Opal 690	0.665962	9936	7
Pt79_t2	CFTR	5	1st	Opal 620	0.247621	15986	7
Pt79_t2	ABCB1	5	2nd	Opal 690	0.827657	15986	7
Pt79_t2	ERBB2	5	3rd	Opal 520	0.0220668	15986	7
Pt79_t3	KRT20	1	1st	Opal 520	0.00568	183744	7
Pt79_t3	CDX2	1	2nd	Opal 570	0.04542	183744	7
Pt79_t3	KRT7	1	3rd	Opal 620	0.007219	183744	7
Pt79_t3	CDH1	1	4th	Opal 690	4.97197	183744	7
Pt79_t3	KRT20	2	1st	Opal 620	0.693068	288590	7
Pt79_t3	UGT1A	2	2nd	Opal 690	0.0606309	288590	7
Pt79_t3	ABCG2	2	3rd	Opal 520	0.669202	288590	7
Pt79_t3	KI67	3	1st	Opal 520	3.64152	285360	7
Pt79_t3	UGT1A	3	2nd	Opal 620	0.248	285360	7
Pt79_t3	HSF1	3	3rd	Opal 690	5.32016	285360	7
Pt79_t3	RIPK1	4	1st	Opal 520	0.607518	103380	7
Pt79_t3	RCC2	4	2nd	Opal 570	1.61153	103380	7
Pt79_t3	TP53	4	3rd	Opal 690	0.985904	103380	7
Pt79_t3	CFTR	5	1st	Opal 620	0.53338	98987	7
Pt79_t3	ABCB1	5	2nd	Opal 690	0.740315	98987	7
Pt79_t3	ERBB2	5	3rd	Opal 520	0.0439143	98987	7
Pt79_t4	KRT20	1	1st	Opal 520	0.526524	1110483	7
Pt79_t4	CDX2	1	2nd	Opal 570	0.039948	1110483	7
Pt79_t4	KRT7	1	3rd	Opal 620	0.00246	1110483	7
Pt79_t4	CDH1	1	4th	Opal 690	5.37178	1110483	7
Pt79_t4	KRT20	2	1st	Opal 620	5.00508	2020577	7
Pt79_t4	UGT1A	2	2nd	Opal 690	0.115251	2020577	7
Pt79_t4	ABCG2	2	3rd	Opal 520	0.156518	2020577	7
Pt79_t4	KI67	3	1st	Opal 520	3.54072	1141461	7
Pt79_t4	UGT1A	3	2nd	Opal 620	0.537498	1141461	7
Pt79_t4	HSF1	3	3rd	Opal 690	2.57458	1141461	7
Pt79_t4	RIPK1	4	1st	Opal 520	2.38963	1655922	7
Pt79_t4	RCC2	4	2nd	Opal 570	1.11176	1655922	7
Pt79_t4	TP53	4	3rd	Opal 690	1.52985	1655922	7
Pt79_t4	CFTR	5	1st	Opal 620	3.26194	2448519	7
Pt79_t4	ABCB1	5	2nd	Opal 690	0.954156	2448519	7
Pt79_t4	ERBB2	5	3rd	Opal 520	0.0551455	2448519	7
Pt76_t1	KRT20	1	1st	Opal 520	0.087991	1087744	7
Pt76_t1	CDX2	1	2nd	Opal 570	0.269379	1087744	7
Pt76_t1	KRT7	1	3rd	Opal 620	0.003774	1087744	7
Pt76_t1	CDH1	1	4th	Opal 690	4.69339	1087744	7
Pt76_t1	KRT20	2	1st	Opal 620	1.78825	1666097	7
Pt76_t1	UGT1A	2	2nd	Opal 690	0.160952	1666097	7
Pt76_t1	ABCG2	2	3rd	Opal 520	0.555459	1666097	7
Pt76_t1	KI67	3	1st	Opal 520	1.83559	1054365	7
Pt76_t1	UGT1A	3	2nd	Opal 620	0.115226	1054365	7
Pt76_t1	HSF1	3	3rd	Opal 690	4.59782	1054365	7
Pt76_t1	RIPK1	4	1st	Opal 520	0.6668	939312	7
Pt76_t1	RCC2	4	2nd	Opal 570	4.65544	939312	7
Pt76_t1	TP53	4	3rd	Opal 690	0.047231	939312	7
Pt76_t1	CFTR	5	1st	Opal 620	0.789079	1190612	7
Pt76_t1	ABCB1	5	2nd	Opal 690	1.87928	1190612	7
Pt76_t1	ERBB2	5	3rd	Opal 520	0.106166	1190612	7
Pt76_t3	KRT20	1	1st	Opal 520	0.193812	371128	7
Pt76_t3	CDX2	1	2nd	Opal 570	0.340022	371128	7
Pt76_t3	KRT7	1	3rd	Opal 620	0.020481	371128	7
Pt76_t3	CDH1	1	4th	Opal 690	7.33653	371128	7
Pt76_t3	KRT20	2	1st	Opal 620	3.02506	432004	7
Pt76_t3	UGT1A	2	2nd	Opal 690	0.0863258	432004	7
Pt76_t3	ABCG2	2	3rd	Opal 520	0.738643	432004	7
Pt76_t3	KI67	3	1st	Opal 520	0.654085	210112	7
Pt76_t3	UGT1A	3	2nd	Opal 620	0.0638187	210112	7
Pt76_t3	HSF1	3	3rd	Opal 690	4.64768	210112	7
Pt76_t3	RIPK1	4	1st	Opal 520	2.53454	306892	7
Pt76_t3	RCC2	4	2nd	Opal 570	1.6737	306892	7
Pt76_t3	TP53	4	3rd	Opal 690	0.028404	306892	7
Pt76_t3	CFTR	5	1st	Opal 620	0.809371	450414	7
Pt76_t3	ABCB1	5	2nd	Opal 690	2.3741	450414	7
Pt76_t3	ERBB2	5	3rd	Opal 520	0.0986906	450414	7
Pt84_t1	KRT20	1	1st	Opal 520	0.0452998	925560	7
Pt84_t1	CDX2	1	2nd	Opal 570	0.405115	925560	7
Pt84_t1	KRT7	1	3rd	Opal 620	0.0154018	925560	7
Pt84_t1	CDH1	1	4th	Opal 690	6.42279	925560	7
Pt84_t1	KRT20	2	1st	Opal 620	0.488461	777703	7
Pt84_t1	UGT1A	2	2nd	Opal 690	4.055	777703	7
Pt84_t1	ABCG2	2	3rd	Opal 520	0.194887	777703	7
Pt84_t1	KI67	3	1st	Opal 520	3.08198	1162337	7
Pt84_t1	UGT1A	3	2nd	Opal 620	6.41186	1162337	7
Pt84_t1	HSF1	3	3rd	Opal 690	5.56062	1162337	7
Pt84_t1	RIPK1	4	1st	Opal 520	2.0685	505768	7
Pt84_t1	RCC2	4	2nd	Opal 570	1.55783	505768	7
Pt84_t1	TP53	4	3rd	Opal 690	5.50353	505768	7
Pt84_t1	CFTR	5	1st	Opal 620	0.859255	515118	7
Pt84_t1	ABCB1	5	2nd	Opal 690	0.535458	515118	7
Pt84_t1	ERBB2	5	3rd	Opal 520	0.0694939	515118	7
Pt85_t3	KRT20	1	1st	Opal 520	0.645771	1052364	7
Pt85_t3	CDX2	1	2nd	Opal 570	0.54632	1052364	7
Pt85_t3	KRT7	1	3rd	Opal 620	0.0152234	1052364	7
Pt85_t3	CDH1	1	4th	Opal 690	5.83284	1052364	7
Pt85_t3	KRT20	2	1st	Opal 620	5.97282	1181482	7
Pt85_t3	UGT1A	2	2nd	Opal 690	0.225314	1181482	7
Pt85_t3	ABCG2	2	3rd	Opal 520	0.371146	1181482	7
Pt85_t3	KI67	3	1st	Opal 520	2.4931	812467	7
Pt85_t3	UGT1A	3	2nd	Opal 620	0.2648	812467	7
Pt85_t3	HSF1	3	3rd	Opal 690	4.51876	812467	7
Pt85_t3	RIPK1	4	1st	Opal 520	0.857346	1045766	7
Pt85_t3	RCC2	4	2nd	Opal 570	4.96085	1045766	7
Pt85_t3	TP53	4	3rd	Opal 690	2.01994	1045766	7
Pt85_t3	CFTR	5	1st	Opal 620	1.2618	1390710	7
Pt85_t3	ABCB1	5	2nd	Opal 690	0.983516	1390710	7
Pt85_t3	ERBB2	5	3rd	Opal 520	0.162147	1390710	7
Pt88_t2	KRT20	1	1st	Opal 520	0.243557	2495916	7
Pt88_t2	CDX2	1	2nd	Opal 570	0.456022	2495916	7
Pt88_t2	KRT7	1	3rd	Opal 620	1.05275	2495916	7
Pt88_t2	CDH1	1	4th	Opal 690	4.22588	2495916	7
Pt88_t2	KRT20	2	1st	Opal 620	1.99953	4436571	7
Pt88_t2	UGT1A	2	2nd	Opal 690	0.80661	4436571	7
Pt88_t2	ABCG2	2	3rd	Opal 520	1.28593	4436571	7
Pt88_t2	KI67	3	1st	Opal 520	3.27624	2476451	7
Pt88_t2	UGT1A	3	2nd	Opal 620	1.00776	2476451	7
Pt88_t2	HSF1	3	3rd	Opal 690	3.40425	2476451	7
Pt88_t2	RIPK1	4	1st	Opal 520	0.742654	2095754	7
Pt88_t2	RCC2	4	2nd	Opal 570	1.92265	2095754	7
Pt88_t2	TP53	4	3rd	Opal 690	0.338064	2095754	7
Pt88_t2	CFTR	5	1st	Opal 620	1.11402	3677209	7
Pt88_t2	ABCB1	5	2nd	Opal 690	0.291311	3677209	7
[truncated: 177 more rows]
